# Supplementary material for: Screening of pesticide distributions in foods of animal origin: a matrix-based approach for biotransfer factor modeling of grazing mammals
Source: Royal Society of Chemistry journal article supplement (doi:10.1039/d1em00454a), 2022-01-01
Supplement: d1em00454a1.xlsx [file d1em00454a1.xlsx]

## Sheet: Cattle
																		Partition coefficient (cattle)											Rate constants in the liver compartment				Rate constants in the kidney compartment			Rate constants in the lung compartment			Rate constants in the fat compartment		Rate constants in the muscle compartment		Rate constants in the mammary gland compartment			Rate constants in the blood compartment
CAS RN	Name	PesticideTargetClass	PesticideChemClass	Biotransformation half-life (fish)	Metabolic rate constant (fish) at 15 oC	KOW	log KOW	KH25C	KAir/Water	Euptake								KLiver/Blood	KLiver/Bile	KKidney/Blood	KKidney/Urine	KLung/Blood	KLung/Air (mass based)	KFat/Blood	KMuscle/Blood	Kmammary gland/Blood	Kmammary gland/Milk		k-Liver→Blood	km,Liver	ke,Bile	k+Blood→Liver	k-Kidney→Blood	ke,Urine	k+Blood→Kidney	k-Lung→Blood	ke,Exhalation	k+Blood→Lung	k-Fat→Blood	k+Blood→Fat	k-Muscle→Blood	k+Blood→Muscle	k-Mammary gland→Blood	ke,Milk	k+Blood→Mammary gland	k+Liver→Blood	k+Kidney→Blood	k+Lung→Blood	k+Fat→Blood
				Day	Day-1	L.L-1		Pa.m3.mol-1	Unitless	Unitless								Unitless	Unitless	Unitless	Unitless	Unitless	Unitless	Unitless	Unitless	Unitless	Unitless		day-1	day-1	day-1	day-1	day-1	day-1	day-1	day-1	day-1	day-1	day-1	day-1	day-1	day-1	day-1	day-1	day-1	day-1	day-1	day-1	day-1
1918-02-1	PICLORAM	Herbicide	Other pesticide class	0.0235	29.4956	79.4328	1.9	5.3833e-09	2.17172e-12	0.999926		Media/Products	Contents (g g-1)					3.09149	3.48265	2.69955	4.59428	2.31978	2.0724e+09	47.8231	2.60576	9.66026	3.30747		2352.99	186.546	0.239282	2488.55	424.454	3.6277	60.307	231.614	2.61372e-08	113.114	1.10727	256.404	2.6112	71.6228	111.241	0.746702	622.149	2352.99	424.454	231.614	1.10727
2164-08-1	LENACIL	Herbicide	Other pesticide class	0.0969	7.15322	1230.27	3.09	7.7871e-06	3.14146e-09	0.999947			Lipid (fat)	Non-lipid organics	Water	Others		5.04175	7.23979	4.2277	59.2766	3.49743	1.77952e+07	89.6876	4.1036	17.3777	3.82569		1442.8	45.2409	0.115105	2488.55	271.03	0.281168	60.307	153.625	3.04389e-06	113.114	0.590415	256.404	1.6581	71.6228	61.8392	0.645557	622.149	1442.8	271.03	153.625	0.590415
2425-06-1	CAPTAFOL	Fungicide	Other pesticide class	5.65	0.122681	6309.57	3.8	0.00049692	2.00466e-07	0.999893		Blood	0.0023	0.1737	0.809	0.015		5.25594	7.78213	4.39553	300.621	3.62677	1.41056e+06	94.2854	4.2681	18.2253	3.8609		1384	0.775901	0.107083	2488.55	260.682	0.0554407	60.307	148.146	3.84008e-05	113.114	0.561623	256.404	1.59419	71.6228	58.9633	0.639669	622.149	1384	260.682	148.146	0.561623
2439-01-2	OXYTHIOQUINOX	Fungicide, Acaricide, Miticide, Insecticide	Dithiocarbamate	0.255	2.71822	6025.6	3.78	0.0062317	2.51398e-06	0.999896		Urine	0	0	0.95	0.05		5.25337	7.77543	4.39352	287.128	3.62522	107434	94.2303	4.26613	18.2151	3.86049		1384.68	17.1915	0.107175	2488.55	260.801	0.0580461	60.307	148.209	0.000504186	113.114	0.561952	256.404	1.59493	71.6228	58.9962	0.639736	622.149	1384.68	260.801	148.209	0.561952
2439-10-3	DODINE	Fungicide	Other pesticide class	0.0741	9.35421	14.1254	1.15	9.1001e-06	3.67114e-09	0.999757		Bile	0.0056	0.0004	0.894	0.1		1.54404	1.48543	1.48703	1.49117	1.38536	431394	14.6056	1.4173	3.53685	2.16447		4711.16	59.1611	0.561006	2488.55	770.551	11.1769	60.307	387.835	0.000125562	113.114	3.62552	256.404	4.80079	71.6228	303.835	1.14102	622.149	4711.16	770.551	387.835	3.62552
2497-07-6	DISULFOTON SULFOXIDE	Metabolite	Organophosphate	0.201	3.44849	53.7032	1.73	0.000353308	1.42531e-07	0.999908		Milk	0.037	0.084	0.872	0.007		2.6629	2.8642	2.36372	3.37172	2.06098	23513.9	38.6231	2.2766	7.9643	3.10575		2731.7	21.8101	0.290948	2488.55	484.758	4.94307	60.307	260.697	0.0023036	113.114	1.37102	256.404	2.98874	71.6228	134.93	0.795202	622.149	2731.7	484.758	260.697	1.37102
2597-03-7	FENTHOATE	Insecticide, Acaricide	Organophosphate	0.0646	10.7298	4897.79	3.69	0.00055348	2.23284e-07	0.999908		Liver	0.036	0.243	0.708	0.013		5.24027	7.74132	4.38325	233.54	3.61731	984007	93.9491	4.25607	18.1633	3.85841		1388.14	67.8613	0.107647	2488.55	261.412	0.0713654	60.307	148.534	5.5047e-05	113.114	0.563634	256.404	1.5987	71.6228	59.1646	0.640081	622.149	1388.14	261.412	148.534	0.563634
3813-05-6	BENAZOLIN	Herbicide	Other pesticide class	0.133	5.21163	21.8776	1.34	4.04e-08	1.62981e-11	0.99983		Kidney	0.031	0.177	0.779	0.013		1.83196	1.81163	1.71263	1.85952	1.55922	1.18417e+08	20.7861	1.63843	4.67617	2.49602		3970.74	32.9612	0.459991	2488.55	669.048	8.96288	60.307	344.59	4.57424e-07	113.114	2.54752	256.404	4.15287	71.6228	229.808	0.989453	622.149	3970.74	669.048	344.59	2.54752
8018-01-7	MANCOZEB	Fungicide	Dithiocarbamate	0.0237	29.2467	4.16869	0.62	1.86281e-08	7.5149e-12	0.999266		Muscle	0.028	0.232	0.731	0.009		1.09603	1.01166	1.13599	1.01808	1.11484	1.51565e+08	4.98862	1.07322	1.76403	1.39832		6636.87	184.972	0.82373	2488.55	1008.67	16.3707	60.307	481.947	3.57383e-07	113.114	10.6147	256.404	6.33994	71.6228	609.185	1.76618	622.149	6636.87	1008.67	481.947	10.6147
10004-44-1	3-HYDROXY-5-METHYLISOXAZOLE	Fungicide	Other pesticide class	0.0172	40.2993	2.88403	0.46	0.0002121	8.55649e-08	0.998955		Fat	0.8	0	0.2	0		1.03035	0.945406	1.08452	0.957036	1.07517	12640.9	3.57859	1.02277	1.5041	1.24624		7059.98	254.874	0.881456	2488.55	1056.54	17.4149	60.307	499.727	0.00428504	113.114	14.7972	256.404	6.65265	71.6228	714.461	1.98173	622.149	7059.98	1056.54	499.727	14.7972
100-44-7	Benzyl chloride	Other product constituent	Other pesticide class	0.148	4.68343	199.526	2.3	41.612	0.016787	0.999946		Lung	0.025	0.162	0.794	0.0098		4.04666	5.09658	3.44799	10.3006	2.89655	0.587635	68.327	3.33935	13.44	3.6178		1797.59	29.6205	0.163508	2488.55	332.32	1.61804	60.307	185.493	92.1774	113.114	0.774993	256.404	2.03757	71.6228	79.9569	0.682651	622.149	1797.59	332.32	185.493	0.774993
100-51-6	benzyl alcohol	Metabolite	Other pesticide class	0.0267	25.9606	12.5893	1.1	0.034037	1.37311e-05	0.999732		Mammary gland	0.15	0.13	0.72	0		1.48124	1.41661	1.43782	1.41818	1.34744	110.34	13.2575	1.36907	3.28834	2.07882		4910.91	164.189	0.588258	2488.55	796.923	11.7521	60.307	398.75	0.490905	113.114	3.99419	256.404	4.96993	71.6228	326.798	1.18803	622.149	4910.91	796.923	398.75	3.99419
100-52-7	benzyldehyde	Metabolite	Other pesticide class	0.156	4.44325	30.1995	1.48	2.6967	0.0010879	0.999866								2.09577	2.12694	1.91934	2.25494	1.71852	2.1157	26.449	1.84104	5.72009	2.73322		3470.91	28.1015	0.3918	2488.55	596.993	7.39118	60.307	312.648	25.6023	113.114	2.00208	256.404	3.69584	71.6228	187.868	0.903586	622.149	3470.91	596.993	312.648	2.00208
100784-20-1	HALOSULFURON-METHYL	Herbicide	Other pesticide class	0.000649	1068.02	2.51189	0.4	1.06287e-08	4.2878e-12	0.998806								1.01093	0.925976	1.06931	0.939353	1.06345	2.48377e+08	3.16188	1.00787	1.42728	1.19862		7195.55	6754.76	0.899952	2488.55	1071.56	17.7427	60.307	505.235	2.18082e-07	113.114	16.7473	256.404	6.75106	71.6228	752.914	2.06045	622.149	7195.55	1071.56	505.235	16.7473
101-05-3	ANILAZINE	Fungicide	Other pesticide class	2.62	0.26456	7585.78	3.88	2.8381e-05	1.14494e-08	0.999879		Physiological variables	Symbol	Unit	Value			5.26514	7.80617	4.40274	361.261	3.63232	2.96759e+07	94.4828	4.27516	18.2616	3.86235		1381.58	1.67322	0.106753	2488.55	260.255	0.0461347	60.307	147.92	1.82527e-06	113.114	0.56045	256.404	1.59156	71.6228	58.8458	0.639428	622.149	1381.58	260.255	147.92	0.56045
101200-48-0	Tribenuron-methyl	Herbicide	Other pesticide class	0.00398	174.158	354.813	2.55	1.0302e-08	4.15601e-12	0.999951		Food intake rate	IRFood	kg day-1	20			4.49873	6.00106	3.80221	17.6791	3.16953	4.04247e+09	78.0311	3.68655	15.2289	3.72267		1616.95	1101.47	0.138864	2488.55	301.36	0.942734	60.307	169.518	1.33994e-08	113.114	0.678613	256.404	1.84567	71.6228	70.5647	0.663421	622.149	1616.95	301.36	169.518	0.678613
101205-02-1	Cycloxydim	Herbicide	Other pesticide class	0.555	1.24891	7585.78	3.88	8.13675e-05	3.28251e-08	0.999879		Exhalation rate	ERExhalation	kg day-1	260			5.26514	7.80617	4.40274	361.261	3.63232	1.0351e+07	94.4828	4.27516	18.2616	3.86235		1381.58	7.89881	0.106753	2488.55	260.255	0.0461347	60.307	147.92	5.233e-06	113.114	0.56045	256.404	1.59156	71.6228	58.8458	0.639428	622.149	1381.58	260.255	147.92	0.56045
101-21-3	CHLORPROPHAM	Herbicide, Plant growth regulator	Carbamate	0.34	2.03867	3235.94	3.51	0.057469	2.3184e-05	0.999926		Urine excretion rate	ERUrine	kg day-1	20			5.20474	7.64943	4.35541	154.577	3.59585	6275.27	93.1863	4.22877	18.0226	3.85273		1397.62	12.8936	0.108941	2488.55	263.083	0.107821	60.307	149.42	0.00863176	113.114	0.568248	256.404	1.60902	71.6228	59.6262	0.641026	622.149	1397.62	263.083	149.42	0.568248
101-27-9	BARBAN	Herbicide	Carbamate	0.314	2.20748	2570.4	3.41	0.0011817	4.76719e-07	0.999933		Bile excretion rate	ERBile	kg day-1	6.5			5.178	7.58093	4.33446	122.953	3.57971	242826	92.6124	4.20824	17.9168	3.8484		1404.83	13.9613	0.109925	2488.55	264.354	0.135553	60.307	150.094	0.000223068	113.114	0.571769	256.404	1.61687	71.6228	59.9783	0.641747	622.149	1404.83	264.354	150.094	0.571769
101-42-8	FENURON	Herbicide	Other pesticide class	0.00757	91.565	9.54993	0.98	0.00020301	8.18979e-08	0.999658		Milk excretion rate	ERMilk	kg day-1	32.6			1.3506	1.27604	1.33546	1.27377	1.26855	16842.3	10.4532	1.26873	2.77138	1.88119		5385.93	579.107	0.653065	2488.55	858.008	13.0845	60.307	423.547	0.00321611	113.114	5.06573	256.404	5.36296	71.6228	387.757	1.31284	622.149	5385.93	858.008	423.547	5.06573
1014-69-3	DESMETRYNE	Herbicide	Other pesticide class	0.0702	9.87389	239.883	2.38	4.8783e-05	1.96799e-08	0.999948		Body mass	---	kg	600			4.20642	5.40444	3.57316	12.2181	2.99302	592847	71.7563	3.46205	14.0722	3.6572		1729.32	62.4479	0.154194	2488.55	320.677	1.36409	60.307	179.515	9.1367e-05	113.114	0.737955	256.404	1.96536	71.6228	76.365	0.675297	622.149	1729.32	320.677	179.515	0.737955
1014-70-6	SIMETRYN	Herbicide	Other pesticide class	0.0933	7.42923	630.957	2.8	4.4743e-05	1.80501e-08	0.999951		Blood mass	Mblood	kg	22.8			4.81449	6.69903	4.04963	30.8001	3.3602	1.61409e+06	84.8092	3.92906	16.4784	3.78517		1510.9	46.9865	0.124396	2488.55	282.948	0.541123	60.307	159.899	3.35586e-05	113.114	0.624377	256.404	1.73176	71.6228	65.214	0.652466	622.149	1510.9	282.948	159.899	0.624377
101-77-9	4,4'-Methylenedianiline	Otehr product constituent	Other pesticide class	0.096	7.22028	38.9045	1.59	5.47225e-05	2.2076e-08	0.999888		Liver mass	Mliver	kg	7.8			2.33206	2.42375	2.10449	2.66856	1.8612	121873	31.5212	2.02251	6.65511	2.90708		3119.23	45.665	0.34382	2488.55	544.471	6.24556	60.307	288.68	0.000444452	113.114	1.67992	256.404	3.36422	71.6228	161.473	0.849546	622.149	3119.23	544.471	288.68	1.67992
101-79-1	Benzenamine, 4-(4-chlorophenoxy)-	Metabolite	Other pesticide class	2.27	0.305351	6025.6	3.78	0.0354548	1.43031e-05	0.999896		Kidney mass	Mkidney	kg	1.2			5.25337	7.77543	4.39352	287.128	3.62522	18883.1	94.2303	4.26613	18.2151	3.86049		1384.68	1.93121	0.107175	2488.55	260.801	0.0580461	60.307	148.209	0.00286853	113.114	0.561952	256.404	1.59493	71.6228	58.9962	0.639736	622.149	1384.68	260.801	148.209	0.561952
10222-01-2	2,2-DIBROMO-2-CYANOACETAMIDE	Microbiocide, Fungicide, Algicide	Other pesticide class	0.00798	86.8605	6.60693	0.82	0.0019291	7.78233e-07	0.999523		Lung mass	Mlung	kg	4.8			1.21532	1.13401	1.22946	1.13393	1.18686	1603.5	7.54918	1.16484	2.23605	1.64329		5985.46	549.353	0.734858	2488.55	931.984	14.6981	60.307	452.699	0.0337802	113.114	7.01439	256.404	5.84131	71.6228	480.589	1.5029	622.149	5985.46	931.984	452.699	7.01439
1024-57-3	Heptachlor epoxide	Metabolite	Other pesticide class	33.7	0.0205682	95499.3	4.98	2.121	0.000855649	0.998904		Fat mass	Mfat	kg	110.4			5.30748	7.91771	4.43592	4538.5	3.65789	4986.19	95.3918	4.30768	18.4292	3.86898		1370.56	0.130084	0.105249	2488.55	258.308	0.00367229	60.307	146.886	0.0108633	113.114	0.555109	256.404	1.57954	71.6228	58.3108	0.638333	622.149	1370.56	258.308	146.886	0.555109
10265-92-6	METHAMIDPHOS	Insecticide, Acaricide, Metabolite	Organophosphate	0.0222	31.2228	0.158489	-0.8	6.64252e-07	2.67971e-10	0.981935		Muscle mass	Mmuscle	kg	240			0.883975	0.800554	0.969828	0.827531	0.986785	3.58202e+06	0.436551	0.910359	0.92489	0.85227		8229	197.47	1.04095	2488.55	1181.48	20.1402	60.307	544.487	1.51218e-05	113.114	121.298	256.404	7.47416	71.6228	1161.89	2.89779	622.149	8229	1181.48	544.487	121.298
102851-06-9	tau-Fluvalinate	Insecticide, Acaricide, Veterinary treatment	Pyrethroid	1.88	0.368695	6.45654e+06	6.81	0.270906	0.000109288	0.933093		Mammary gland mass	MMammary gland	kg	13.2			5.31112	7.92736	4.43877	306786	3.66009	2.63873e+06	95.4699	4.31048	18.4436	3.86955		1369.62	2.33183	0.105121	2488.55	258.142	5.43268e-05	60.307	146.797	2.05275e-05	113.114	0.554655	256.404	1.57852	71.6228	58.2652	0.638239	622.149	1369.62	258.142	146.797	0.554655
1031-07-8	ENDOSULFAN SULFATE	Metabolite	Other pesticide class	4.34	0.159711	4570.88	3.66	0.032825	1.32422e-05	0.999912		Blood flow rate of liver	QBlood⇔Liver	kg day-1	56739			5.23529	7.72838	4.37935	218.007	3.6143	15489.2	93.8421	4.25224	18.1435	3.85762		1389.46	1.0101	0.107828	2488.55	261.645	0.0764502	60.307	148.657	0.00349705	113.114	0.564276	256.404	1.60014	71.6228	59.2289	0.640212	622.149	1389.46	261.645	148.657	0.564276
103112-35-2	FENCHLORAZOLE-ETHYL	Herbicide safener	Other pesticide class	3.63	0.19095	33113.1	4.52	0.00039794	1.60536e-07	0.999596		Blood flow rate of kidney	QBlood⇔Kidney	kg day-1	1375			5.30054	7.89934	4.43048	1574.2	3.6537	9.21881e+06	95.2429	4.30235	18.4017	3.8679		1372.36	1.20767	0.105494	2488.55	258.625	0.0105874	60.307	147.054	5.87567e-06	113.114	0.555978	256.404	1.5815	71.6228	58.3978	0.638511	622.149	1372.36	258.625	147.054	0.555978
10311-84-9	DIALIFOR	Insecticide, Acaricide	Organophosphate	9.12	0.076003	48977.9	4.69	0.017978	7.25265e-06	0.99942		Blood flow rate of lung	QBlood⇔Lung	kg day-1	2579			5.30398	7.90844	4.43317	2328.02	3.65578	301759	95.3167	4.30499	18.4154	3.86844		1371.47	0.480684	0.105373	2488.55	258.468	0.00715916	60.307	146.97	0.000179503	113.114	0.555547	256.404	1.58053	71.6228	58.3546	0.638422	622.149	1371.47	258.468	146.97	0.555547
103-33-3	AZOBENZENE	Acaricide, Ovicide, Miticide	Other pesticide class	0.591	1.17284	6606.93	3.82	1.3635	0.00055006	0.999889		Blood flow rate of fat	QBlood⇔Fat	kg day-1	5846			5.2584	7.78855	4.39745	314.751	3.62825	538.217	94.3382	4.26999	18.235	3.86129		1383.35	7.41766	0.106995	2488.55	260.567	0.052952	60.307	148.085	0.100641	113.114	0.561309	256.404	1.59349	71.6228	58.9319	0.639604	622.149	1383.35	260.567	148.085	0.561309
103361-09-7	Flumioxazin	Herbicide	Other pesticide class	0.507	1.36715	354.813	2.55	0.063428	2.5588e-05	0.999951		Blood flow rate of muscle	QBlood⇔Muscle	kg day-1	1633			4.49873	6.00106	3.80221	17.6791	3.16953	656.58	78.0311	3.68655	15.2289	3.72267		1616.95	8.64663	0.138864	2488.55	301.36	0.942734	60.307	169.518	0.0824982	113.114	0.678613	256.404	1.84567	71.6228	70.5647	0.663421	622.149	1616.95	301.36	169.518	0.678613
104-40-5	P-NONYLPHENOL	Adjuvant, Other product constituent	Other pesticide class	1.33	0.521163	575440	5.76	3.434	0.00138534	0.993617		Blood flow rate of mammary gland	QBlood⇔Mammary gland	kg day-1	14185			5.31056	7.92588	4.43833	27343	3.65975	18553.6	95.4579	4.31005	18.4414	3.86946		1369.77	3.29612	0.105141	2488.55	258.168	0.00060954	60.307	146.811	0.00291947	113.114	0.554725	256.404	1.57868	71.6228	58.2722	0.638254	622.149	1369.77	258.168	146.811	0.554725
104-46-1	ANETHOLE	Insecticide, Miticide, Other, Repellent	Botanical insecticide	2.4	0.288811	2454.71	3.39	12.5511	0.00506335	0.999935								5.17192	7.56542	4.3297	117.456	3.57604	21.8418	92.4819	4.20357	17.8928	3.84741		1406.48	1.8266	0.11015	2488.55	264.645	0.141897	60.307	150.248	2.47996	113.114	0.572576	256.404	1.61866	71.6228	60.0589	0.641912	622.149	1406.48	264.645	150.248	0.572576
10453-86-8	RESMETHRIN	Insecticide	Pyrethroid	0.323	2.14597	1.38038e+06	6.14	0.013433	5.41911e-06	0.984873								5.31092	7.92682	4.43861	65590.2	3.65997	1.13775e+07	95.4656	4.31032	18.4428	3.86951		1369.67	13.5723	0.105128	2488.55	258.151	0.000254103	60.307	146.802	4.76086e-06	113.114	0.55468	256.404	1.57857	71.6228	58.2678	0.638245	622.149	1369.67	258.151	146.802	0.55468
105512-06-9	CLODINAFOP-PROPARGYL	Herbicide	Other pesticide class	0.0734	9.44342	7943.28	3.9	0.00027876	1.12457e-07	0.999875								5.26719	7.81154	4.40434	378.248	3.63356	3.16335e+06	94.5269	4.27674	18.2698	3.86268		1381.05	59.7253	0.10668	2488.55	260.16	0.0440628	60.307	147.869	1.71232e-05	113.114	0.560189	256.404	1.59097	71.6228	58.8197	0.639375	622.149	1381.05	260.16	147.869	0.560189
10552-74-6	Nitrothal-isopropyl	Fungicide	Other pesticide class	0.014	49.5105	1995.26	3.3	0.567248	0.000228838	0.99994								5.14109	7.48719	4.30554	95.6255	3.55742	393.603	91.82	4.17989	17.7708	3.84235		1414.92	313.131	0.111301	2488.55	266.13	0.174291	60.307	151.034	0.137618	113.114	0.576703	256.404	1.62783	71.6228	60.4713	0.642756	622.149	1414.92	266.13	151.034	0.576703
105-67-9	2,4-dimethylphenol	Fungicide, Microbiocide, Disinfectant, Bactericide, Other product constituent	Other pesticide class	0.0865	8.01326	199.526	2.3	0.096051	3.87487e-05	0.999946								4.04666	5.09658	3.44799	10.3006	2.89655	254.58	68.327	3.33935	13.44	3.6178		1797.59	50.6802	0.163508	2488.55	332.32	1.61804	60.307	185.493	0.212769	113.114	0.774993	256.404	2.03757	71.6228	79.9569	0.682651	622.149	1797.59	332.32	185.493	0.774993
10605-21-7	CARBENDAZIM	Fungicide, Metabolite	Imidazole	0.0249	27.8372	33.1131	1.52	2.1412e-06	8.63798e-10	0.999875								2.17892	2.22978	1.9845	2.39338	1.76873	2.81524e+06	28.2339	1.9049	6.04913	2.798		3338.46	176.058	0.373729	2488.55	577.392	6.96365	60.307	303.773	1.92405e-05	113.114	1.87551	256.404	3.57193	71.6228	177.649	0.882664	622.149	3338.46	577.392	303.773	1.87551
106-24-1	GERANIOL	Fungicide, Insect attractant/repellent, Veterinary treatment	Botanical insecticide	1.2	0.577623	3630.78	3.56	1.1615	0.00046857	0.999922								5.21606	7.67862	4.36428	173.338	3.60269	348.127	93.4294	4.23747	18.0674	3.85455		1394.58	3.6532	0.108527	2488.55	262.548	0.0961514	60.307	149.136	0.155595	113.114	0.566769	256.404	1.60571	71.6228	59.4783	0.640723	622.149	1394.58	262.548	149.136	0.566769
106325-08-0	BAS 480F	Fungicide	Triazole	5	0.138629	2754.23	3.44	0.0018635	7.51769e-07	0.999931								5.18664	7.60301	4.34123	131.688	3.58492	164905	92.7979	4.21488	17.951	3.8498		1402.49	0.876768	0.109606	2488.55	263.942	0.126562	60.307	149.875	0.000328472	113.114	0.570626	256.404	1.61432	71.6228	59.864	0.641513	622.149	1402.49	263.942	149.875	0.570626
106-89-8	Epichlorohydrin	Fungicide, Insecticide, Microbiocide, Other product constituent	Organochlorine	0.0683	10.1486	2.81838	0.45	3.0704	0.00123865	0.998932								1.02694	0.941986	1.08185	0.953916	1.07311	0.870851	3.50535	1.02015	1.4906	1.23796		7083.44	64.1851	0.884656	2488.55	1059.15	17.4718	60.307	500.686	62.1997	113.114	15.1063	256.404	6.66974	71.6228	720.932	1.99497	622.149	7083.44	1059.15	500.686	15.1063
106-93-4	Ethylene dibromide	Insecticide, Fumigant	Other pesticide class	0.151	4.59038	91.2011	1.96	65.65	0.0264844	0.99993								3.24447	3.71783	2.81942	5.15345	2.41215	0.189784	51.107	2.72325	10.2656	3.36805		2242.04	29.0321	0.224145	2488.55	406.408	3.23408	60.307	222.744	285.413	113.114	1.03612	256.404	2.49854	71.6228	104.682	0.733272	622.149	2242.04	406.408	222.744	1.03612
106-99-0	1,3-butadiene	Other product constituent	Other pesticide class	0.338	2.05073	97.7237	1.99	7433.6	2.99885	0.999932								3.32051	3.83776	2.879	5.46337	2.45807	0.00177323	52.7393	2.78165	10.5665	3.39632		2190.7	12.9699	0.21714	2488.55	397.997	3.05062	60.307	218.583	30547	113.114	1.00405	256.404	2.44609	71.6228	101.701	0.727168	622.149	2190.7	397.997	218.583	1.00405
107-02-8	Acrolein	Herbicide	Other pesticide class	0.0723	9.5871	0.977237	-0.01	12.322	0.00497092	0.996994								0.928986	0.844695	1.0051	0.866434	1.01396	0.200456	1.40276	0.944928	1.103	0.982514		7830.29	60.634	0.986549	2488.55	1140.02	19.2359	60.307	529.892	270.218	113.114	37.7491	256.404	7.20073	71.6228	974.268	2.51365	622.149	7830.29	1140.02	529.892	37.7491
1071-83-6	Glyphosate	Herbicide	Other pesticide class	0.0025	277.259	0.000398107	-3.4	2.121e-07	8.55649e-11	0.120342								0.875177	0.791968	0.962935	0.820019	0.981472	1.11356e+07	0.247695	0.903602	0.890075	0.825755		8311.73	1753.54	1.05223	2488.55	1189.94	20.3247	60.307	547.435	4.86427e-06	113.114	213.782	256.404	7.53005	71.6228	1207.34	2.99083	622.149	8311.73	1189.94	547.435	213.782
107-21-1	Ethylene glycol	Other product constituent	Other pesticide class	0.00647	107.132	0.0436516	-1.36	0.00606	2.44471e-06	0.93747								0.877587	0.794319	0.964823	0.822074	0.982928	390.537	0.29944	0.905453	0.899614	0.833056		8288.9	677.564	1.04912	2488.55	1187.61	20.2739	60.307	546.624	0.138698	113.114	176.84	256.404	7.51465	71.6228	1194.54	2.96462	622.149	8288.9	1187.61	546.624	176.84
107-41-5	2-METHYL-2,4-PENTANEDIOL	Other product constituent	Other pesticide class	0.0352	19.6917	3.80189	0.58	0.000204845	8.26383e-08	0.999198								1.07749	0.99287	1.12146	1.00065	1.10363	13584.6	4.59046	1.05898	1.69063	1.35673		6751.12	124.541	0.839318	2488.55	1021.74	16.6559	60.307	486.838	0.00398734	113.114	11.5354	256.404	6.42522	71.6228	635.633	1.82033	622.149	6751.12	1021.74	486.838	11.5354
107-49-3	TETRAETHYL PYROPHOSPHATE	Insecticide, Acaricide	Organophosphate	0.00535	129.56	2.81838	0.45	1.01e-05	4.07452e-09	0.998932								1.02694	0.941986	1.08185	0.953916	1.07311	264739	3.50535	1.02015	1.4906	1.23796		7083.44	819.409	0.884656	2488.55	1059.15	17.4718	60.307	500.686	0.000204604	113.114	15.1063	256.404	6.66974	71.6228	720.932	1.99497	622.149	7083.44	1059.15	500.686	15.1063
107534-96-3	TEBUCONAZOLE	Fungicide, Plant growth regulator	Triazole	5.13	0.135116	5011.87	3.7	1.4645e-05	5.90806e-09	0.999907								5.24186	7.74545	4.3845	238.961	3.61827	3.80512e+07	93.9832	4.25729	18.1695	3.85867		1387.72	0.85455	0.10759	2488.55	261.337	0.0697465	60.307	148.494	1.42352e-06	113.114	0.563429	256.404	1.59824	71.6228	59.1441	0.640039	622.149	1387.72	261.337	148.494	0.563429
108-10-1	Methyl isobutyl ketone	Other product constituent	Other pesticide class	0.0993	6.98033	20.4174	1.31	13.938	0.00562284	0.99982								1.78114	1.75274	1.67281	1.79014	1.52853	0.331637	19.6952	1.5994	4.47508	2.4438		4084.03	44.1474	0.475447	2488.55	684.974	9.31027	60.307	351.508	163.331	113.114	2.68862	256.404	4.25421	71.6228	240.135	1.0106	622.149	4084.03	684.974	351.508	2.68862
108-44-1	M-TOLUIDINE	Metabolite	Other pesticide class	0.114	6.08024	25.1189	1.4	0.16766	6.7637e-05	0.999847								1.9397	1.93843	1.79705	2.01353	1.62428	30.6745	23.0987	1.72117	5.1025	2.59929		3750.19	38.4547	0.429901	2488.55	637.619	8.27733	60.307	330.788	1.76585	113.114	2.29246	256.404	3.95322	71.6228	210.607	0.950141	622.149	3750.19	637.619	330.788	2.29246
1085-98-9	DICHLOFLUANID	Fungicide	Other pesticide class	1.72	0.402993	5011.87	3.7	0.0038178	1.54017e-06	0.999907								5.24186	7.74545	4.3845	238.961	3.61827	145963	93.9832	4.25729	18.1695	3.85867		1387.72	2.54874	0.10759	2488.55	261.337	0.0697465	60.307	148.494	0.000371098	113.114	0.563429	256.404	1.59824	71.6228	59.1441	0.640039	622.149	1387.72	261.337	148.494	0.563429
108-62-3	Metaldehyde (tetramer)	Molluscicide	Other pesticide class	0.108	6.41803	1.31826	0.12	0.0713307	2.87761e-05	0.997761								0.947465	0.862919	1.01958	0.882637	1.02512	35.157	1.79943	0.95912	1.17613	1.0335		7677.58	40.5911	0.965714	2488.55	1123.83	18.8828	60.307	524.124	1.54071	113.114	29.4276	256.404	7.09418	71.6228	913.695	2.38964	622.149	7677.58	1123.83	524.124	29.4276
108-78-1	Melamine	Metabolite	Other pesticide class	0.000691	1003.11	0.042658	-1.37	1.8584e-09	7.49712e-13	0.936107								0.877532	0.794265	0.96478	0.822027	0.982894	1.27343e+09	0.298252	0.905411	0.899395	0.832889		8289.42	6344.2	1.04919	2488.55	1187.66	20.2751	60.307	546.642	4.2536e-08	113.114	177.544	256.404	7.51501	71.6228	1194.83	2.96522	622.149	8289.42	1187.66	546.642	177.544
108-94-1	cyclohexanone	Other product constituent	Other pesticide class	0.0577	12.0129	6.45654	0.81	0.909	0.000366707	0.999513								1.20816	1.12658	1.22384	1.12678	1.18254	3.38467	7.39544	1.15934	2.20771	1.62959		6020.94	75.9764	0.739699	2488.55	936.258	14.7913	60.307	454.354	16.0035	113.114	7.16021	256.404	5.86903	71.6228	486.758	1.51553	622.149	6020.94	936.258	454.354	7.16021
109-79-5	BUTANETHIOL	Repellent, Other product constituent	Other pesticide class	0.192	3.61014	190.546	2.28	458.54	0.184983	0.999946								4.00462	5.01757	3.41504	9.87386	2.87117	0.051159	67.4245	3.30706	13.2736	3.60696		1816.46	22.8325	0.166083	2488.55	335.525	1.68796	60.307	187.134	1058.79	113.114	0.785366	256.404	2.05746	71.6228	80.9591	0.684703	622.149	1816.46	335.525	187.134	0.785366
109-86-4	2-Methoxyethanol	Other product constituent	Other pesticide class	0.0174	39.836	0.169824	-0.77	0.03333	1.34459e-05	0.983118								0.884604	0.801169	0.970321	0.828069	0.987165	71.4258	0.450063	0.910842	0.92738	0.854153		8223.15	251.945	1.04015	2488.55	1180.88	20.1271	60.307	544.278	0.758363	113.114	117.657	256.404	7.47019	71.6228	1158.77	2.8914	622.149	8223.15	1180.88	544.278	117.657
110-17-8	FUMARIC ACID	Other product constituent	Other pesticide class	0.184	3.7671	2.88403	0.46	0.000340472	1.37352e-07	0.998955								1.03035	0.945406	1.08452	0.957036	1.07517	7874.74	3.57859	1.02277	1.5041	1.24624		7059.98	23.8252	0.881456	2488.55	1056.54	17.4149	60.307	499.727	0.00687853	113.114	14.7972	256.404	6.65265	71.6228	714.461	1.98173	622.149	7059.98	1056.54	499.727	14.7972
110-27-0	ISOPROPYL MYRISTATE	Other product constituent	Other pesticide class	1.21	0.572849	1.47911e+07	7.17	249.02	0.100459	0.858946								5.31115	7.92744	4.43879	702804	3.66011	6576.25	95.4706	4.3105	18.4437	3.86955		1369.61	3.62301	0.10512	2488.55	258.141	2.37145e-05	60.307	146.797	0.00823671	113.114	0.554651	256.404	1.57851	71.6228	58.2649	0.638239	622.149	1369.61	258.141	146.797	0.554651
110488-70-5	DIMETHOMORPH	Fungicide	Morpholine	0.787	0.880746	478.63	2.68	2.0301e-05	8.18979e-09	0.999952								4.67895	6.39218	3.94342	23.5623	3.27836	2.72667e+06	81.8996	3.82496	15.942	3.75929		1554.67	5.57032	0.130368	2488.55	290.568	0.707346	60.307	163.891	1.98655e-05	113.114	0.646558	256.404	1.77889	71.6228	67.4081	0.656958	622.149	1554.67	290.568	163.891	0.646558
110-96-3	DIISOBUTYLAMINE	Metabolite	Other pesticide class	0.982	0.705853	426.58	2.63	56.762	0.0228988	0.999952								4.61393	6.24892	3.89247	21.0891	3.23909	0.87367	80.5039	3.77502	15.6847	3.74638		1576.58	4.4642	0.133356	2488.55	294.372	0.790299	60.307	165.877	61.999	113.114	0.657768	256.404	1.80242	71.6228	68.5138	0.659222	622.149	1576.58	294.372	165.877	0.657768
1113-02-6	DIMETHOXON	Insecticide, Acaricide, Metabolite	Organophosphate	0.00178	389.409	0.18197	-0.74	7.04948e-07	2.84389e-10	0.984224								0.885278	0.801828	0.97085	0.828646	0.987572	3.37892e+06	0.464537	0.91136	0.930049	0.856168		8216.89	2462.83	1.03929	2488.55	1180.24	20.1131	60.307	544.053	1.60307e-05	113.114	113.991	256.404	7.46595	71.6228	1155.45	2.88459	622.149	8216.89	1180.24	544.053	113.991
111-30-8	PENTANE-1,5-DIAL	Fungicide, Bactericide, Other product consitituent	Other pesticide class	0.052	13.3298	0.660693	-0.18	0.0479043	1.93255e-05	0.995578								0.911692	0.827695	0.991547	0.851393	1.00352	50.8298	1.03154	0.931646	1.03457	0.933515		7978.82	84.3046	1.00681	2488.55	1155.6	19.5758	60.307	535.406	1.06565	113.114	51.3336	256.404	7.30338	71.6228	1038.71	2.64559	622.149	7978.82	1155.6	535.406	51.3336
11141-17-6	Azadirachtin	Insecticide, Fungicide	Botanical insecticide	0.00473	146.543	12.3027	1.09	9.9485e-09	4.0134e-12	0.999727								1.46929	1.40361	1.42846	1.40457	1.34022	3.74321e+08	13.001	1.35989	3.24105	2.06188		4950.84	926.816	0.593706	2488.55	802.146	11.8661	60.307	400.897	1.44707e-07	113.114	4.07299	256.404	5.00346	71.6228	331.565	1.19779	622.149	4950.84	802.146	400.897	4.07299
1114-71-2	PEBULATE	Herbicide	Other pesticide class	0.181	3.82954	6760.83	3.83	23.937	0.00965661	0.999888								5.25959	7.79165	4.39838	322.063	3.62897	31.3698	94.3636	4.2709	18.2397	3.86148		1383.04	24.2201	0.106952	2488.55	260.512	0.0517497	60.307	148.056	1.72672	113.114	0.561158	256.404	1.59315	71.6228	58.9167	0.639573	622.149	1383.04	260.512	148.056	0.561158
111479-05-1	PROPAQUIZAFOP	Herbicide	Other pesticide class	0.228	3.04012	39810.7	4.6	3.0906e-07	1.2468e-10	0.999521								5.30233	7.90406	4.43188	1892.44	3.65478	1.42693e+10	95.2812	4.30373	18.4088	3.86818		1371.89	19.2274	0.105431	2488.55	258.544	0.00880698	60.307	147.011	3.79603e-09	113.114	0.555754	256.404	1.58099	71.6228	58.3754	0.638465	622.149	1371.89	258.544	147.011	0.555754
111-76-2	Ethylene glycol, monobutyl ether	Other product constituent	Other pesticide class	0.0537	12.9078	6.76083	0.83	0.1616	6.51923e-05	0.999533								1.22262	1.14158	1.23518	1.14124	1.19127	19.2472	7.70594	1.17044	2.26495	1.65713		5949.7	81.6357	0.729981	2488.55	927.667	14.604	60.307	451.023	2.81426	113.114	6.8717	256.404	5.81332	71.6228	474.457	1.49034	622.149	5949.7	927.667	451.023	6.8717
111-92-2	DIBUTYLAMINE	Metabolite	Other pesticide class	1.29	0.537323	676.083	2.83	8.989	0.00362632	0.999951								4.84415	6.7677	4.07287	32.9443	3.37811	8.58999	85.4459	3.95184	16.5958	3.79066		1501.65	3.39833	0.123134	2488.55	281.333	0.505904	60.307	159.051	6.30579	113.114	0.619724	256.404	1.72177	71.6228	64.7528	0.651522	622.149	1501.65	281.333	159.051	0.619724
111991-09-4	Nicosulfuron	Herbicide	Other pesticide class	0.00037	1873.37	1.02329	0.01	9.02902e-12	3.64247e-15	0.997128								0.93149	0.847162	1.00706	0.868622	1.01548	2.74129e+11	1.45653	0.946852	1.11292	0.989507		7809.24	11848.2	0.983677	2488.55	1137.8	19.1875	60.307	529.103	1.97596e-10	113.114	36.3556	256.404	7.1861	71.6228	965.591	2.49589	622.149	7809.24	1137.8	529.103	36.3556
112-05-0	NONANOIC ACID	Herbicide, Plant growth regulator, Adjuvant	Botanical insecticide	0.865	0.801326	2630.27	3.42	0.16362	6.60072e-05	0.999933								5.18095	7.58844	4.33677	125.798	3.58148	1794.26	92.6756	4.2105	17.9285	3.84888		1404.04	5.06802	0.109816	2488.55	264.214	0.132487	60.307	150.019	0.0301889	113.114	0.571379	256.404	1.616	71.6228	59.9393	0.641667	622.149	1404.04	264.214	150.019	0.571379
112-12-9	UNDECANONE	Repellent, Sterilant	Other pesticide class	0.662	1.04705	12302.7	4.09	6.4236	0.0025914	0.999826								5.28268	7.8522	4.41648	585.386	3.64291	212.416	94.8593	4.28863	18.331	3.86511		1377	6.62211	0.106127	2488.55	259.445	0.0284712	60.307	147.49	0.255003	113.114	0.558226	256.404	1.58656	71.6228	58.623	0.638972	622.149	1377	259.445	147.49	0.558226
112226-61-6	HALOFENOZIDE	Insecticide	Other pesticide class	2.28	0.304012	1659.59	3.22	1.0623e-06	4.28551e-10	0.999943								5.10826	7.40466	4.27981	79.6758	3.53759	1.75191e+08	91.1153	4.15468	17.6409	3.83691		1424.01	1.92274	0.112542	2488.55	267.73	0.209181	60.307	151.881	3.09186e-07	113.114	0.581164	256.404	1.63771	71.6228	60.9166	0.643668	622.149	1424.01	267.73	151.881	0.581164
112-30-1	1-DECANOL	Plant growth regulator, Other product constituent	Other pesticide class	0.789	0.878514	37153.5	4.57	3.232	0.00130385	0.999551								5.3017	7.90239	4.43138	1766.18	3.6544	1273.48	95.2676	4.30324	18.4063	3.86808		1372.06	5.5562	0.105453	2488.55	258.572	0.00943655	60.307	147.026	0.0425345	113.114	0.555833	256.404	1.58117	71.6228	58.3833	0.638481	622.149	1372.06	258.572	147.026	0.555833
112410-23-8	TEBUFENOZIDE	Insecticide	Other pesticide class	3.8	0.182407	17782.8	4.25	0.0012726	5.1339e-07	0.999766								5.29142	7.87524	4.42333	845.775	3.64819	1.54896e+06	95.047	4.29535	18.3656	3.86648		1374.72	1.15364	0.105817	2488.55	259.043	0.0197058	60.307	147.276	3.49696e-05	113.114	0.557123	256.404	1.58408	71.6228	58.5126	0.638746	622.149	1374.72	259.043	147.276	0.557123
112-53-8	DODECANOL	Insecticide, Adjuvant, Other product constituent	Botanical insecticide	1.11	0.624457	134896	5.13	2.2422	0.000904544	0.998468								5.30856	7.92057	4.43676	6410.46	3.65854	6662.04	95.415	4.30851	18.4335	3.86915		1370.28	3.94941	0.105211	2488.55	258.259	0.00259992	60.307	146.859	0.00813065	113.114	0.554975	256.404	1.57924	71.6228	58.2973	0.638305	622.149	1370.28	258.259	146.859	0.554975
1129-41-5	N-METHYL-M-TOLYLCARBAMATE	Insecticide, Acaricide	Carbamate	0.0574	12.0757	50.1187	1.7	0.0091203	3.67929e-06	0.999904								2.58969	2.76411	2.30636	3.20141	2.01677	867.383	37.0516	2.22038	7.67462	3.06555		2808.91	76.3735	0.301483	2488.55	496.814	5.20604	60.307	266.412	0.0624484	113.114	1.42917	256.404	3.06442	71.6228	140.023	0.805629	622.149	2808.91	496.814	266.412	1.42917
113136-77-9	Cyclanilide	Plant growth regulator	Other pesticide class	0.223	3.10828	63.0957	1.8	7.3831e-05	2.97847e-08	0.999916								2.83727	3.10894	2.50036	3.81801	2.16627	126608	42.3661	2.41052	8.65431	3.19422		2563.81	19.6585	0.268044	2488.55	458.268	4.36527	60.307	248.026	0.000427831	113.114	1.24989	256.404	2.82269	71.6228	124.172	0.773176	622.149	2563.81	458.268	248.026	1.24989
1134-23-2	CYCLOATE	Herbicide	Other pesticide class	0.229	3.02684	7585.78	3.88	0.6767	0.000272993	0.999879								5.26514	7.80617	4.40274	361.261	3.63232	1244.62	94.4828	4.27516	18.2616	3.86235		1381.58	19.1434	0.106753	2488.55	260.255	0.0461347	60.307	147.92	0.0435207	113.114	0.56045	256.404	1.59156	71.6228	58.8458	0.639428	622.149	1381.58	260.255	147.92	0.56045
114-26-1	Propoxur	Insecticide, Acaricide, Veterinary treatment	Carbamate	0.0536	12.9319	33.1131	1.52	0.00014443	5.82656e-08	0.999875								2.17892	2.22978	1.9845	2.39338	1.76873	41736.4	28.2339	1.9049	6.04913	2.798		3338.46	81.7881	0.373729	2488.55	577.392	6.96365	60.307	303.773	0.00129783	113.114	1.87551	256.404	3.57193	71.6228	177.649	0.882664	622.149	3338.46	577.392	303.773	1.87551
114311-32-9	Imazamox	Herbicide	Other pesticide class	0.00118	587.413	5.37032	0.73	1.1632e-10	4.69256e-14	0.999422								1.15568	1.0725	1.18272	1.07517	1.15085	2.54161e+10	6.2689	1.11903	2.00004	1.52544		6294.35	3715.12	0.777001	2488.55	968.81	15.5014	60.307	466.865	2.13119e-09	113.114	8.44692	256.404	6.08042	71.6228	537.299	1.61901	622.149	6294.35	968.81	466.865	8.44692
114369-43-6	Fenbuconazole	Fungicide	Triazole	3.23	0.214597	1698.24	3.23	0.0083931	3.38593e-06	0.999943								5.11267	7.41571	4.28327	81.5126	3.54026	22683.6	91.21	4.15807	17.6583	3.83765		1422.78	1.35723	0.112374	2488.55	267.514	0.204467	60.307	151.766	0.00238792	113.114	0.58056	256.404	1.63638	71.6228	60.8564	0.643545	622.149	1422.78	267.514	151.766	0.58056
115-29-7	Endosulfan	Insecticide, Acaricide	Organochlorine	5.39	0.128599	6760.83	3.83	6.565	0.00264844	0.999888								5.25959	7.79165	4.39838	322.063	3.62897	114.379	94.3636	4.2709	18.2397	3.86148		1383.04	0.813328	0.106952	2488.55	260.512	0.0517497	60.307	148.056	0.473572	113.114	0.561158	256.404	1.59315	71.6228	58.9167	0.639573	622.149	1383.04	260.512	148.056	0.561158
115-32-2	DICOFOL	Acaricide	Organochlorine	37.4	0.0185333	104713	5.02	0.024442	9.86034e-06	0.998802								5.30781	7.91857	4.43617	4976.29	3.65809	474422	95.3988	4.30793	18.4305	3.86903		1370.48	0.117215	0.105238	2488.55	258.293	0.00334922	60.307	146.878	0.000114174	113.114	0.555069	256.404	1.57945	71.6228	58.3067	0.638324	622.149	1370.48	258.293	146.878	0.555069
115-90-2	FENSULFOTHION	Insecticide, Nematicide	Organophosphate	0.948	0.731168	169.824	2.23	0.0010201	4.11527e-07	0.999944								3.89605	4.81727	3.32998	8.88926	2.80561	20747.2	65.094	3.22368	12.844	3.57799		1867.08	4.6243	0.172989	2488.55	344.097	1.87492	60.307	191.506	0.0026108	113.114	0.813483	256.404	2.11068	71.6228	83.667	0.690247	622.149	1867.08	344.097	191.506	0.813483
116-06-3	Aldicarb	Insecticide, Acaricide, Nematicide	Carbamate	0.065	10.6638	13.4896	1.13	0.00014544	5.86731e-08	0.999747								1.5183	1.45712	1.46686	1.46096	1.36982	26508.1	14.0531	1.39753	3.435	2.13004		4791.03	67.4437	0.571903	2488.55	781.146	11.408	60.307	392.235	0.0020434	113.114	3.76807	256.404	4.8687	71.6228	312.845	1.15946	622.149	4791.03	781.146	392.235	3.76807
116255-48-2	BROMUCONAZOLE	Fungicide	Triazole	4.52	0.153351	1737.8	3.24	3.0199e-05	1.21828e-08	0.999942								5.11699	7.42654	4.28665	83.3922	3.54287	6.44939e+06	91.3027	4.16138	17.6754	3.83837		1421.58	0.969876	0.11221	2488.55	267.302	0.199859	60.307	151.655	8.39873e-06	113.114	0.579971	256.404	1.63507	71.6228	60.7975	0.643424	622.149	1421.58	267.302	151.655	0.579971
116-29-0	TETRADIFON	Acaricide	Other pesticide class	16.6	0.0417559	40738	4.61	0.00014544	5.86731e-08	0.999511								5.30253	7.90459	4.43203	1936.5	3.6549	3.10282e+07	95.2855	4.30388	18.4096	3.86821		1371.84	0.264087	0.105424	2488.55	258.534	0.00860659	60.307	147.006	1.74573e-06	113.114	0.555729	256.404	1.58094	71.6228	58.3728	0.63846	622.149	1371.84	258.534	147.006	0.555729
117-18-0	2,3,5,6-TETRACHLORONITROBENZENE	Fungicide, Plant growth regulator	Other pesticide class	2.94	0.235764	23988.3	4.38	29.9587	0.0120859	0.999697								5.29651	7.88868	4.42732	1140.63	3.65127	88.7312	95.1563	4.29926	18.3858	3.86727		1373.4	1.4911	0.105637	2488.55	258.81	0.0146118	60.307	147.152	0.610458	113.114	0.556483	256.404	1.58264	71.6228	58.4484	0.638615	622.149	1373.4	258.81	147.152	0.556483
117337-19-6	Fluthiacet-methyl	Herbicide	Other pesticide class	0.769	0.901362	5888.44	3.77	0.00020907	8.43426e-08	0.999897								5.25204	7.77196	4.39248	280.611	3.62442	3.12962e+06	94.2018	4.26511	18.2098	3.86028		1385.03	5.7007	0.107223	2488.55	260.863	0.0593942	60.307	148.242	1.73078e-05	113.114	0.562122	256.404	1.59531	71.6228	59.0133	0.639771	622.149	1385.03	260.863	148.242	0.562122
117718-60-2	Thiazopyr	Herbicide	Other pesticide class	0.0193	35.9144	7762.47	3.89	0.047369	1.91095e-05	0.999877								5.26617	7.80889	4.40355	369.656	3.63295	18193.2	94.5051	4.27596	18.2657	3.86252		1381.31	227.142	0.106716	2488.55	260.207	0.0450869	60.307	147.894	0.00297729	113.114	0.560318	256.404	1.59126	71.6228	58.8326	0.639401	622.149	1381.31	260.207	147.894	0.560318
117-80-6	DICHLONE	Fungicide, Algicide	Other pesticide class	1.55	0.447192	446.684	2.65	0.00416258	1.67926e-06	0.999952								4.64057	6.30731	3.91335	22.0443	3.25518	12448.3	81.0757	3.79548	15.7901	3.75171		1567.53	2.82828	0.132122	2488.55	292.801	0.756053	60.307	165.057	0.00435133	113.114	0.653129	256.404	1.7927	71.6228	68.0565	0.658286	622.149	1567.53	292.801	165.057	0.653129
118-74-1	hexachlorobenzene	Fungicide, Metabolite	Other pesticide class	21.5	0.0322394	537032	5.73	171.7	0.0692669	0.994038								5.31052	7.92576	4.43829	25518.1	3.65973	346.306	95.457	4.31002	18.4412	3.86945		1369.78	0.2039	0.105142	2488.55	258.17	0.000653132	60.307	146.812	0.156413	113.114	0.55473	256.404	1.57869	71.6228	58.2728	0.638255	622.149	1369.78	258.17	146.812	0.55473
118-75-2	CHLORANIL	Fungicide	Other pesticide class	0.395	1.7548	165.959	2.22	0.00029899	1.20618e-07	0.999944								3.87377	4.77681	3.31252	8.70558	2.79216	69354.1	64.6157	3.20657	12.7559	3.57186		1877.82	11.0983	0.174454	2488.55	345.91	1.91448	60.307	192.429	0.000781016	113.114	0.819505	256.404	2.12194	71.6228	84.2453	0.691431	622.149	1877.82	345.91	192.429	0.819505
119-12-0	PYRIDAPHENTHION	Insecticide	Organophosphate	0.644	1.07632	1584.89	3.2	4.9793e-06	2.00874e-09	0.999944								5.09915	7.3819	4.27268	76.1267	3.53209	3.5715e+07	90.9198	4.14768	17.6048	3.83539		1426.56	6.8072	0.112889	2488.55	268.177	0.218933	60.307	152.117	1.51664e-06	113.114	0.582413	256.404	1.64047	71.6228	61.0413	0.643923	622.149	1426.56	268.177	152.117	0.582413
119-38-0	ISOLAN	Insecticide, Fumigant	Carbamate	0.0629	11.0198	44.6684	1.65	2.81693e-05	1.1364e-08	0.999897								2.47029	2.60411	2.2128	2.94243	1.94467	259408	34.4884	2.12867	7.2021	2.99562		2944.69	69.6954	0.320007	2488.55	517.821	5.66425	60.307	276.289	0.000208809	113.114	1.53538	256.404	3.19644	71.6228	149.209	0.824437	622.149	2944.69	517.821	276.289	1.53538
119446-68-3	Difenoconazole	Fungicide	Triazole	21.2	0.0326956	19952.6	4.3	8.9991e-07	3.6304e-10	0.999742								5.29356	7.88088	4.42501	948.875	3.64949	2.45741e+09	95.0929	4.29699	18.3741	3.86681		1374.17	0.206785	0.105741	2488.55	258.945	0.0175647	60.307	147.224	2.20422e-08	113.114	0.556854	256.404	1.58347	71.6228	58.4856	0.638691	622.149	1374.17	258.945	147.224	0.556854
1194-65-6	2,6-DICHLOROBENZONITRILE	Herbicide, Metabolite	Other pesticide class	1.4	0.495105	549.541	2.74	1.0201	0.000411527	0.999952								4.75021	6.55211	3.99926	26.9316	3.32139	61.9597	83.4294	3.87969	16.224	3.77307		1531.35	3.13131	0.127186	2488.55	286.511	0.618851	60.307	161.767	0.874224	113.114	0.634703	256.404	1.75379	71.6228	66.2364	0.65456	622.149	1531.35	286.511	161.767	0.634703
12002-53-8	Trimedlure	Pheromone, Insecticide	Other pesticide class	0.775	0.894383	39810.7	4.6	218773	88.2569	0.999521								5.30233	7.90406	4.43188	1892.44	3.65478	0.0201582	95.2812	4.30373	18.4088	3.86818		1371.89	5.65657	0.105431	2488.55	258.544	0.00880698	60.307	147.011	2687.08	113.114	0.555754	256.404	1.58099	71.6228	58.3754	0.638465	622.149	1371.89	258.544	147.011	0.555754
120068-37-3	Fipronil	Insecticide, Veterinary treatment	Other pesticide class	3.77	0.183859	10000	4	8.5042e-05	3.43075e-08	0.999852								5.27616	7.83508	4.41138	475.973	3.63898	1.30468e+07	94.7195	4.28363	18.3053	3.86409		1378.7	1.16282	0.106359	2488.55	259.745	0.035016	60.307	147.649	4.15171e-06	113.114	0.559049	256.404	1.58841	71.6228	58.7055	0.639141	622.149	1378.7	259.745	147.649	0.559049
120-36-5	DICHLORPROP	Herbicide	Other pesticide class	1.14	0.608024	2691.53	3.43	4.1641e-05	1.67987e-08	0.999932								5.18383	7.5958	4.33902	128.709	3.58322	7.21307e+06	92.7374	4.21271	17.9399	3.84934		1403.26	3.84547	0.10971	2488.55	264.076	0.129491	60.307	149.946	7.50951e-06	113.114	0.570998	256.404	1.61515	71.6228	59.9012	0.641589	622.149	1403.26	264.076	149.946	0.570998
120-51-4	BENZYL BENZOATE	Acaricide, Insecticide, Veterinary treatment, Other product constituent	Other pesticide class	0.044	15.7533	9332.54	3.97	0.411904	0.000166169	0.999859								5.27368	7.82857	4.40943	444.259	3.63748	2514.25	94.6662	4.28172	18.2955	3.8637		1379.35	99.6327	0.106448	2488.55	259.86	0.0375157	60.307	147.71	0.0215439	113.114	0.559364	256.404	1.58912	71.6228	58.7371	0.639205	622.149	1379.35	259.86	147.71	0.559364
12071-83-9	(PROPYLENEBIS(DITHIOCARBAMATO))ZINC	Fungicide	Dithiocarbamate	0.0179	38.7233	114.815	2.06	7.14171e-06	2.88109e-09	0.999936								3.49555	4.12187	3.01616	6.27549	2.56377	2.11067e+06	56.4969	2.91609	11.2592	3.45722		2080.99	244.907	0.202174	2488.55	379.898	2.65584	60.307	209.571	2.56633e-05	113.114	0.937271	256.404	2.33332	71.6228	95.4438	0.714358	622.149	2080.99	379.898	209.571	0.937271
120-83-2	2,4-dichlorophenol	Metabolite	Other pesticide class	0.436	1.58979	1148.15	3.06	0.43329	0.000174797	0.999948								5.02373	7.19565	4.21358	55.3749	3.48655	298.833	89.3008	4.08976	17.3064	3.8226		1447.97	10.0547	0.115811	2488.55	271.938	0.300979	60.307	154.104	0.181261	113.114	0.592973	256.404	1.66371	71.6228	62.094	0.646078	622.149	1447.97	271.938	154.104	0.592973
120-93-4	2-Imidazolidinone	Metabolite	Other pesticide class	0.000899	771.02	0.18197	-0.74	0.00559618	2.2576e-06	0.984224								0.885278	0.801828	0.97085	0.828646	0.987572	425.642	0.464537	0.91136	0.930049	0.856168		8216.89	4876.35	1.03929	2488.55	1180.24	20.1131	60.307	544.053	0.127259	113.114	113.991	256.404	7.46595	71.6228	1155.45	2.88459	622.149	8216.89	1180.24	544.053	113.991
12122-67-7	ZINEB	Fungicide	Dithiocarbamate	0.0223	31.0828	0.40738	-0.39	2.08092e-05	8.3948e-09	0.992871								0.897755	0.814031	0.980626	0.839357	0.995106	115666	0.732362	0.920942	0.97942	0.893089		8102.69	196.585	1.02371	2488.55	1168.47	19.8565	60.307	539.934	0.000468301	113.114	72.3043	256.404	7.38827	71.6228	1097.2	2.76534	622.149	8102.69	1168.47	539.934	72.3043
1214-39-7	1H-PURIN-6-AMINE, N-(PHENYLMETHYL)-	Plant growth regulator	Botanical insecticide	0.00996	69.5931	37.1535	1.57	8.9284e-09	3.60188e-12	0.999884								2.28736	2.36651	2.06947	2.58536	1.83421	7.25251e+08	30.5617	1.98818	6.47824	2.87652		3180.19	440.145	0.352136	2488.55	553.686	6.44655	60.307	292.928	7.46868e-08	113.114	1.73266	256.404	3.42231	71.6228	165.882	0.858572	622.149	3180.19	553.686	292.928	1.73266
121552-61-2	CGA 219417 (CYPRODINIL)	Fungicide	Anilinopyrimidine	0.246	2.81767	10000	4	0.0084739	3.41852e-06	0.999852								5.27616	7.83508	4.41138	475.973	3.63898	130935	94.7195	4.28363	18.3053	3.86409		1378.7	17.8205	0.106359	2488.55	259.745	0.035016	60.307	147.649	0.000413692	113.114	0.559049	256.404	1.58841	71.6228	58.7055	0.639141	622.149	1378.7	259.745	147.649	0.559049
121-75-5	Malathion	Insecticide, Acaricide, Veterinary treatment	Organophosphate	0.00758	91.4442	229.087	2.36	0.00049389	1.99244e-07	0.999948								4.16777	5.32884	3.54288	11.7051	2.96969	56137	70.9268	3.43237	13.9192	3.64792		1745.35	578.343	0.156382	2488.55	323.418	1.42388	60.307	180.925	0.000964901	113.114	0.746586	256.404	1.98235	71.6228	77.204	0.677014	622.149	1745.35	323.418	180.925	0.746586
121-86-8	2-CHLORO-4-NITROTOLUENE	Metabolite	Other pesticide class	0.581	1.19302	1000	3	2.20669	0.000890216	0.999949								4.98428	7.0998	4.18267	48.3353	3.46273	51.2436	88.454	4.05946	17.1503	3.81576		1459.43	7.54534	0.117374	2488.55	273.948	0.344813	60.307	155.164	1.05704	113.114	0.598649	256.404	1.67613	71.6228	62.6592	0.647236	622.149	1459.43	273.948	155.164	0.598649
122-14-5	FENITROTHION	Insecticide	Organophosphate	0.785	0.88299	1995.26	3.3	0.09393	3.7893e-05	0.99994								5.14109	7.48719	4.30554	95.6255	3.55742	2376.99	91.82	4.17989	17.7708	3.84235		1414.92	5.58451	0.111301	2488.55	266.13	0.174291	60.307	151.034	0.0227879	113.114	0.576703	256.404	1.62783	71.6228	60.4713	0.642756	622.149	1414.92	266.13	151.034	0.576703
122-20-3	2-Propanol, 1,1',1''-nitrilotris-	Other product constituent	Other pesticide class	0.00073	949.517	0.060256	-1.22	5.71506e-07	2.30556e-10	0.953897								0.878512	0.795221	0.965548	0.822863	0.983486	4.1443e+06	0.31929	0.906163	0.903273	0.835849		8280.17	6005.26	1.04793	2488.55	1186.72	20.2545	60.307	546.314	1.30702e-05	113.114	165.846	256.404	7.50876	71.6228	1189.7	2.95472	622.149	8280.17	1186.72	546.314	165.846
122-34-9	simazine	Herbicide	Other pesticide class	0.0875	7.92168	151.356	2.18	9.5142e-05	3.8382e-08	0.999942								3.78287	4.61399	3.24129	8.01174	2.73727	200957	62.6644	3.13676	12.3962	3.54619		1922.94	50.101	0.18061	2488.55	353.512	2.08028	60.307	196.288	0.000269544	113.114	0.845023	256.404	2.16917	71.6228	86.6899	0.696436	622.149	1922.94	353.512	196.288	0.845023
122-39-4	diphenylamine	Fungicide, Insecticide, Plant growth regulator	Other pesticide class	0.262	2.6456	3162.28	3.5	0.27169	0.000109605	0.999927								5.20232	7.64321	4.35351	151.077	3.59439	1297.35	93.1343	4.22691	18.0131	3.85234		1398.27	16.7322	0.109029	2488.55	263.197	0.110319	60.307	149.481	0.0417516	113.114	0.568565	256.404	1.60972	71.6228	59.6579	0.641091	622.149	1398.27	263.197	149.481	0.568565
122-42-9	ISOPROPYL PHENYL CARBAMATE	Herbicide, Plant growth regulator	Carbamate	0.0422	16.4253	398.107	2.6	0.018584	7.49712e-06	0.999951								4.57237	6.15862	3.85991	19.7362	3.214	2498.86	79.6118	3.7431	15.5203	3.73795		1590.91	103.882	0.135312	2488.55	296.855	0.844472	60.307	167.172	0.0216765	113.114	0.665139	256.404	1.81779	71.6228	69.2398	0.660709	622.149	1590.91	296.855	167.172	0.665139
122836-35-5	Sulfentrazone	Herbicide	Other pesticide class	0.017	40.7734	446.684	2.65	6.4337e-08	2.59547e-11	0.999952								4.64057	6.30731	3.91335	22.0443	3.25518	8.05401e+08	81.0757	3.79548	15.7901	3.75171		1567.53	257.873	0.132122	2488.55	292.801	0.756053	60.307	165.057	6.72543e-08	113.114	0.653129	256.404	1.7927	71.6228	68.0565	0.658286	622.149	1567.53	292.801	165.057	0.653129
122-88-3	P-CHLOROPHENOXYACETIC ACID	Plant growth regulator, Herbicide	Other pesticide class	1.06	0.653912	177.828	2.25	0.0012687	5.11815e-07	0.999945								3.94006	4.89782	3.36446	9.26955	2.83218	17380.3	66.0386	3.25748	13.0182	3.58991		1846.22	4.1357	0.170144	2488.55	340.57	1.798	60.307	189.709	0.00311656	113.114	0.801847	256.404	2.08878	71.6228	82.5479	0.687955	622.149	1846.22	340.57	189.709	0.801847
122931-48-0	RIMSULFURON	Herbicide	Other pesticide class	0.000944	734.266	1.94984	0.29	6.4842e-05	2.61584e-08	0.998473								0.98128	0.896425	1.04607	0.912648	1.04554	39753.5	2.52531	0.985091	1.30994	1.12333		7413	4643.9	0.929618	2488.55	1095.37	18.2619	60.307	513.888	0.00136256	113.114	20.9688	256.404	6.90715	71.6228	820.36	2.19854	622.149	7413	1095.37	513.888	20.9688
123312-89-0	Pymetrozine	Insecticide	Other pesticide class	0.000434	1597.11	0.660693	-0.18	1.37829e-06	5.56026e-10	0.995578								0.911692	0.827695	0.991547	0.851393	1.00352	1.76666e+06	1.03154	0.931646	1.03457	0.933515		7978.82	10101	1.00681	2488.55	1155.6	19.5758	60.307	535.406	3.06604e-05	113.114	51.3336	256.404	7.30338	71.6228	1038.71	2.64559	622.149	7978.82	1155.6	535.406	51.3336
123-31-9	Hydroquinone	Other product constituent	Other pesticide class	0.0113	61.3405	3.89045	0.59	4.7773e-06	1.92725e-09	0.999216								1.08198	0.997415	1.12498	1.00486	1.10635	584547	4.68691	1.06243	1.70841	1.3669		6723.08	387.95	0.835493	2488.55	1018.54	16.5861	60.307	485.644	9.26644e-05	113.114	11.298	256.404	6.40435	71.6228	629.017	1.80679	622.149	6723.08	1018.54	485.644	11.298
123-33-1	MALEIC HYDRAZIDE	Plant growth regulator, Herbicide	Other pesticide class	0.013	53.319	0.144544	-0.84	1.21949e-07	4.91963e-11	0.98023								0.8832	0.799798	0.969221	0.826868	0.986317	1.94986e+07	0.419922	0.909764	0.921824	0.849949		8236.22	337.218	1.04193	2488.55	1182.22	20.1564	60.307	544.746	2.77798e-06	113.114	126.102	256.404	7.47905	71.6228	1165.76	2.9057	622.149	8236.22	1182.22	544.746	126.102
123343-16-8	Pyrithiobac-sodium salt	Herbicide	Other pesticide class	0.598	1.15911	3.98107	0.6	2.2927e-12	9.24916e-16	0.999233								1.08657	1.00206	1.12857	1.00916	1.10912	1.2224e+12	4.78539	1.06595	1.72657	1.37722		6694.7	7.33084	0.83162	2488.55	1015.3	16.5154	60.307	484.431	4.43118e-11	113.114	11.0655	256.404	6.38318	71.6228	622.403	1.79325	622.149	6694.7	1015.3	484.431	11.0655
123-91-1	1,4-Dioxane	Other product constituent	Other pesticide class	0.0311	22.2877	0.537032	-0.27	0.4848	0.000195577	0.994574								0.9049	0.821031	0.986224	0.845517	0.99942	4.99438	0.885727	0.926429	1.00769	0.913918		8038.72	140.959	1.01498	2488.55	1161.84	19.7118	60.307	537.604	10.8455	113.114	59.7847	256.404	7.34451	71.6228	1066.42	2.70232	622.149	8038.72	1161.84	537.604	59.7847
12427-38-2	MANEB	Fungicide	Dithiocarbamate	0.0237	29.2467	4.16869	0.62	1.86281e-08	7.5149e-12	0.999266								1.09603	1.01166	1.13599	1.01808	1.11484	1.51565e+08	4.98862	1.07322	1.76403	1.39832		6636.87	184.972	0.82373	2488.55	1008.67	16.3707	60.307	481.947	3.57383e-07	113.114	10.6147	256.404	6.33994	71.6228	609.185	1.76618	622.149	6636.87	1008.67	481.947	10.6147
124-40-3	Dimethylamine	Metabolite	Other pesticide class	0.134	5.17274	0.416869	-0.38	1.7877	0.00072119	0.993031								0.898279	0.814544	0.981036	0.839808	0.995422	1.34697	0.743603	0.921344	0.981493	0.894623		8097.97	32.7152	1.02307	2488.55	1167.98	19.8458	60.307	539.763	40.2138	113.114	71.2112	256.404	7.38504	71.6228	1094.88	2.7606	622.149	8097.97	1167.98	539.763	71.2112
124-58-3	METHANE ARSONATE	Herbicide	Other pesticide class	0.00966	71.7544	0.0660693	-1.18	8.96683e-06	3.61738e-09	0.95778								0.878836	0.795537	0.965802	0.823139	0.983681	264211	0.326237	0.906412	0.904554	0.836826		8277.12	453.814	1.04751	2488.55	1186.41	20.2477	60.307	546.205	0.000205013	113.114	162.314	256.404	7.50671	71.6228	1188.01	2.95127	622.149	8277.12	1186.41	546.205	162.314
125401-92-5	Bispyribac-sodium	Herbicide	Other pesticide class	0.143	4.84718	0.0933254	-1.03	4.98767e-17	2.01211e-20	0.969727								0.880352	0.797018	0.96699	0.824434	0.984597	4.75603e+16	0.358797	0.907577	0.910556	0.841397		8262.86	30.6562	1.04556	2488.55	1184.95	20.2159	60.307	545.697	1.1389e-15	113.114	147.585	256.404	7.49707	71.6228	1180.18	2.93523	622.149	8262.86	1184.95	545.697	147.585
126-22-7	BUTONATE	Insecticide	Organophosphate	0.0582	11.9097	51.2861	1.71	0.0167275	6.74816e-06	0.999906								2.61398	2.79714	2.32539	3.25688	2.03144	480.649	37.5729	2.23903	7.7707	3.0791		2782.82	75.3237	0.297924	2488.55	492.749	5.11738	60.307	264.489	0.112695	113.114	1.40934	256.404	3.03889	71.6228	138.291	0.802084	622.149	2782.82	492.749	264.489	1.40934
126535-15-7	Triflusulfuron-methyl	Herbicide	Other pesticide class	0.00189	366.745	8709.64	3.94	4.01749e-08	1.62073e-11	0.999866								5.27102	7.8216	4.40735	414.661	3.63588	2.40613e+10	94.6092	4.27968	18.2849	3.86328		1380.04	2319.49	0.106543	2488.55	259.983	0.0401935	60.307	147.775	2.25119e-09	113.114	0.559701	256.404	1.58988	71.6228	58.7708	0.639275	622.149	1380.04	259.983	147.775	0.559701
127-20-8	DALAPON (SODIUM SALT)	Herbicide	Other pesticide class	0.0887	7.81451	0.0074131	-2.13	1.36603e-09	5.51081e-13	0.718089								0.875568	0.792349	0.963241	0.820352	0.981708	1.72957e+09	0.256091	0.903902	0.891623	0.826942		8308.02	49.4232	1.05172	2488.55	1189.56	20.3165	60.307	547.303	3.13181e-08	113.114	206.773	256.404	7.52755	71.6228	1205.24	2.98654	622.149	8308.02	1189.56	547.303	206.773
12771-68-5	ANCYMIDOL	Plant growth regulator	Other pesticide class	0.817	0.848405	81.2831	1.91	1.5756e-06	6.35625e-10	0.999926								3.11702	3.52135	2.71956	4.68219	2.3352	7.21071e+06	48.3712	2.62537	9.7613	3.31795		2333.71	5.36578	0.236652	2488.55	421.331	3.55959	60.307	230.084	7.51197e-06	113.114	1.09472	256.404	2.59169	71.6228	110.09	0.744345	622.149	2333.71	421.331	230.084	1.09472
128639-02-1	Carfentrazone-ethyl	Herbicide	Other pesticide class	0.0117	59.2433	2290.87	3.36	0.00029896	1.20606e-07	0.999936								5.1623	7.54093	4.32216	109.671	3.57022	856298	92.2753	4.19618	17.8547	3.84584		1409.11	374.687	0.110508	2488.55	265.107	0.151969	60.307	150.492	6.32568e-05	113.114	0.573858	256.404	1.62151	71.6228	60.187	0.642174	622.149	1409.11	265.107	150.492	0.573858
13071-79-9	TERBUFOS	Insecticide, Nematicide	Organophosphate	1.98	0.350074	30199.5	4.48	2.424	0.000977885	0.999628								5.29952	7.89663	4.42968	1435.76	3.65309	1380.34	95.2209	4.30157	18.3977	3.86774		1372.62	2.21406	0.10553	2488.55	258.672	0.0116083	60.307	147.079	0.0392415	113.114	0.556106	256.404	1.58179	71.6228	58.4106	0.638537	622.149	1372.62	258.672	147.079	0.556106
13121-70-5	TRICYCLOHEXYLHYDROXYSTANNANE	Insecticide, Acaricide, Metabolite	Other pesticide class	9.87	0.0702277	4.2658e+06	6.63	0.012844	5.1815e-06	0.954757								5.31109	7.92728	4.43874	202691	3.66007	3.67717e+07	95.4693	4.31046	18.4435	3.86954		1369.63	0.444158	0.105122	2488.55	258.144	8.22268e-05	60.307	146.798	1.47305e-06	113.114	0.554659	256.404	1.57853	71.6228	58.2656	0.63824	622.149	1369.63	258.144	146.798	0.554659
131341-86-1	FLUDIOXONIL	Fungicide	Other pesticide class	5.8	0.119508	13182.6	4.12	5.3732e-05	2.16765e-08	0.999817								5.28457	7.85718	4.41796	627.194	3.64405	2.72071e+07	94.8999	4.29008	18.3385	3.86541		1376.5	0.755834	0.10606	2488.55	259.358	0.0265734	60.307	147.443	1.9909e-06	113.114	0.557987	256.404	1.58602	71.6228	58.5991	0.638923	622.149	1376.5	259.358	147.443	0.557987
13171-21-6	PHOSPHAMIDON	Insecticide, Acaricide	Organophosphate	0.0236	29.3706	6.16595	0.79	6.5751e-07	2.65251e-10	0.999491								1.19425	1.1122	1.21295	1.11298	1.17414	4.63034e+06	7.09686	1.14865	2.15267	1.60265		6091.06	185.756	0.749266	2488.55	944.67	14.9749	60.307	457.604	1.16982e-05	113.114	7.46145	256.404	5.92361	71.6228	499.204	1.54101	622.149	6091.06	944.67	457.604	7.46145
13181-17-4	BROMOFENOXIM	Herbicide	Other pesticide class	0.0384	18.0507	1995.26	3.3	1.05113e-05	4.24043e-09	0.99994								5.14109	7.48719	4.30554	95.6255	3.55742	2.12411e+07	91.82	4.17989	17.7708	3.84235		1414.92	114.162	0.111301	2488.55	266.13	0.174291	60.307	151.034	2.55009e-06	113.114	0.576703	256.404	1.62783	71.6228	60.4713	0.642756	622.149	1414.92	266.13	151.034	0.576703
131860-33-8	Azoxystrobin	Fungicide	Strobilurin	0.67	1.03455	316.228	2.5	7.373e-09	2.9744e-12	0.99995								4.41952	5.83493	3.74014	15.8457	3.1217	5.06896e+09	76.3308	3.62572	14.9154	3.70571		1645.93	6.54304	0.142818	2488.55	306.361	1.05181	60.307	172.115	1.06859e-08	113.114	0.693729	256.404	1.87664	71.6228	72.0475	0.666457	622.149	1645.93	306.361	172.115	0.693729
13194-48-4	O-ETHYL S,S-DIPROPYL PHOSPHORODITHIOATE	Insecticide, Nematicide	Organophosphate	0.158	4.38701	3890.45	3.59	0.016362	6.60072e-06	0.999919								5.22228	7.69469	4.36916	185.676	3.60645	26469.8	93.5629	4.24225	18.0921	3.85554		1392.92	27.7458	0.1083	2488.55	262.255	0.0897621	60.307	148.981	0.00204636	113.114	0.56596	256.404	1.60391	71.6228	59.3974	0.640557	622.149	1392.92	262.255	148.981	0.56596
1330-20-7	Xylenes	Other product constituent	Other pesticide class	0.958	0.723536	1318.26	3.12	523.18	0.21106	0.999946								5.05871	7.28154	4.24099	63.4574	3.50767	0.283487	90.0516	4.11662	17.4448	3.82857		1437.96	4.57603	0.114445	2488.55	270.181	0.262643	60.307	153.176	191.073	113.114	0.588028	256.404	1.65285	71.6228	61.6013	0.64507	622.149	1437.96	270.181	153.176	0.588028
133-06-2	Captan	Fungicide, Bactericide	Other pesticide class	2.51	0.276154	630.957	2.8	0.000707	2.85216e-07	0.999951								4.81449	6.69903	4.04963	30.8001	3.3602	102149	84.8092	3.92906	16.4784	3.78517		1510.9	1.74655	0.124396	2488.55	282.948	0.541123	60.307	159.899	0.000530272	113.114	0.624377	256.404	1.73176	71.6228	65.214	0.652466	622.149	1510.9	282.948	159.899	0.624377
133-07-3	FOLPET	Fungicide	Other pesticide class	3.14	0.220748	707.946	2.85	0.0077366	3.12108e-06	0.999951								4.86305	6.81174	4.08767	34.4583	3.38952	10436.5	85.8516	3.96635	16.6705	3.79412		1495.82	1.39613	0.122338	2488.55	280.314	0.483677	60.307	158.515	0.00519011	113.114	0.616796	256.404	1.71547	71.6228	64.4623	0.650927	622.149	1495.82	280.314	158.515	0.616796
133-32-4	3-INDOLEBUTYRIC ACID	Plant growth regulator	Botanical insecticide	0.471	1.47165	199.526	2.3	0.00019511	7.8711e-08	0.999946								4.04666	5.09658	3.44799	10.3006	2.89655	125327	68.327	3.33935	13.44	3.6178		1797.59	9.30752	0.163508	2488.55	332.32	1.61804	60.307	185.493	0.000432201	113.114	0.774993	256.404	2.03757	71.6228	79.9569	0.682651	622.149	1797.59	332.32	185.493	0.774993
13356-08-6	FENBUTATIN OXIDE	Acaricide	Other pesticide class	8750	7.92168e-05	4.46684e+14	14.65	0.000199319	8.04089e-08	2.01687e-07								5.31118	7.9275	4.43881	2.12243e+13	3.66012	2.48121e+17	95.4711	4.31052	18.4438	3.86955		1369.61	0.00050101	0.105119	2488.55	258.14	7.85263e-13	60.307	146.796	2.18307e-16	113.114	0.554649	256.404	1.5785	71.6228	58.2646	0.638238	622.149	1369.61	258.14	146.796	0.554649
13360-45-7	CHLORBROMURON	Herbicide	Other pesticide class	0.11	6.30134	1230.27	3.09	0.00044238	1.78464e-07	0.999947								5.04175	7.23979	4.2277	59.2766	3.49743	313244	89.6876	4.1036	17.3777	3.82569		1442.8	39.8531	0.115105	2488.55	271.03	0.281168	60.307	153.625	0.000172922	113.114	0.590415	256.404	1.6581	71.6228	61.8392	0.645557	622.149	1442.8	271.03	153.625	0.590415
133-90-4	3-AMINO-2,5-DICHLOROBENZOIC ACID	Herbicide	Other pesticide class	0.123	5.63534	79.4328	1.9	3.9087e-06	1.57684e-09	0.999926								3.09149	3.48265	2.69955	4.59428	2.31978	2.85424e+06	47.8231	2.60576	9.66026	3.30747		2352.99	35.641	0.239282	2488.55	424.454	3.6277	60.307	231.614	1.89776e-05	113.114	1.10727	256.404	2.6112	71.6228	111.241	0.746702	622.149	2352.99	424.454	231.614	1.10727
134-20-3	METHYL ANTHRANILATE	Repellent	Botanical insecticide	0.0307	22.5781	75.8578	1.88	0.19089	7.70084e-05	0.999924								3.04042	3.40591	2.65954	4.42441	2.28894	56.3703	46.727	2.56655	9.4582	3.28606		2392.51	142.796	0.244673	2488.55	430.839	3.76698	60.307	234.733	0.960908	113.114	1.13324	256.404	2.6511	71.6228	113.618	0.751568	622.149	2392.51	430.839	234.733	1.13324
13457-18-6	PYRAZOPHOS	Fungicide	Other pesticide class	0.0921	7.52603	6309.57	3.8	0.00269063	1.08545e-06	0.999893								5.25594	7.78213	4.39553	300.621	3.62677	260510	94.2854	4.2681	18.2253	3.8609		1384	47.5987	0.107083	2488.55	260.682	0.0554407	60.307	148.146	0.000207926	113.114	0.561623	256.404	1.59419	71.6228	58.9633	0.639669	622.149	1384	260.682	148.146	0.561623
134-62-3	DEET [N,N,-DIET-3-ME BENZAMIDE]	Insecticide, Repellent	Other pesticide class	0.206	3.36479	151.356	2.18	0.0765886	3.08972e-05	0.999942								3.78287	4.61399	3.24129	8.01174	2.73727	249.638	62.6644	3.13676	12.3962	3.54619		1922.94	21.2808	0.18061	2488.55	353.512	2.08028	60.307	196.288	0.216981	113.114	0.845023	256.404	2.16917	71.6228	86.6899	0.696436	622.149	1922.94	353.512	196.288	0.845023
135158-54-2	CGA 245704	Fungicide, Insecticide	Other pesticide class	0.22	3.15067	1258.93	3.1	0.012019	4.84868e-06	0.999947								5.04752	7.25397	4.23222	60.6383	3.50092	11793.5	89.8114	4.10803	17.4005	3.82667		1441.15	19.9265	0.11488	2488.55	270.741	0.274854	60.307	153.472	0.00459294	113.114	0.589601	256.404	1.65631	71.6228	61.7581	0.645391	622.149	1441.15	270.741	153.472	0.589601
13593-03-8	QUINALPHOS	Insecticide, Acaricide	Organophosphate	0.944	0.734266	27542.3	4.44	0.0046864	1.89058e-06	0.999657								5.2984	7.89367	4.4288	1309.5	3.65241	651193	95.1968	4.30071	18.3933	3.86757		1372.91	4.6439	0.10557	2488.55	258.723	0.0127275	60.307	147.106	8.31807e-05	113.114	0.556246	256.404	1.5821	71.6228	58.4247	0.638566	622.149	1372.91	258.723	147.106	0.556246
13684-56-5	DESMEDIPHAM	Herbicide	Carbamate	0.0245	28.2917	2454.71	3.39	1.7069e-05	6.88594e-09	0.999935								5.17192	7.56542	4.3297	117.456	3.57604	1.60606e+07	92.4819	4.20357	17.8928	3.84741		1406.48	178.932	0.11015	2488.55	264.645	0.141897	60.307	150.248	3.37264e-06	113.114	0.572576	256.404	1.61866	71.6228	60.0589	0.641912	622.149	1406.48	264.645	150.248	0.572576
13684-63-4	PHENMEDIPHAM	Herbicide	Carbamate	0.0715	9.69437	3890.45	3.59	8.4941e-08	3.42667e-11	0.999919								5.22228	7.69469	4.36916	185.676	3.60645	5.09882e+09	93.5629	4.24225	18.0921	3.85554		1392.92	61.3124	0.1083	2488.55	262.255	0.0897621	60.307	148.981	1.06234e-08	113.114	0.56596	256.404	1.60391	71.6228	59.3974	0.640557	622.149	1392.92	262.255	148.981	0.56596
137-26-8	Thiram	Fungicide, Repellent, Metabolite	Dithiocarbamate	0.228	3.04012	53.7032	1.73	0.018382	7.41563e-06	0.999908								2.6629	2.8642	2.36372	3.37172	2.06098	451.945	38.6231	2.2766	7.9643	3.10575		2731.7	19.2274	0.290948	2488.55	484.758	4.94307	60.307	260.697	0.119852	113.114	1.37102	256.404	2.98874	71.6228	134.93	0.795202	622.149	2731.7	484.758	260.697	1.37102
137-30-4	ZIRAM	Fungicide, Repellent	Dithiocarbamate	0.109	6.35915	16.9824	1.23	6.2519e-05	2.52213e-08	0.999792								1.65553	1.60962	1.57439	1.62693	1.45269	67852.3	16.9989	1.50293	3.97804	2.30377		4393.89	40.2187	0.517721	2488.55	727.794	10.2443	60.307	369.861	0.000798303	113.114	3.11508	256.404	4.52727	71.6228	270.139	1.07203	622.149	4393.89	727.794	369.861	3.11508
137-41-7	Methylcarbamodithioic acid, Monopotassium salt	Fungicide, Insecticide, Nematicide, Soil sterilent	Dithiocarbamate	0.0381	18.1928	3.01995	0.48	0.0316086	1.27515e-05	0.999								1.03739	0.952475	1.09004	0.963494	1.07943	85.299	3.72985	1.02819	1.53198	1.26321		7012.03	115.061	0.874913	2488.55	1051.18	17.2982	60.307	497.757	0.635021	113.114	14.1971	256.404	6.61764	71.6228	701.457	1.9551	622.149	7012.03	1051.18	497.757	14.1971
137-42-8	METHYLDITHIOCARBAMIC ACID, NA SALT	Herbicide, Fungicide, Nematicide, Insecticide	Dithiocarbamate	0.0334	20.7529	0.00239883	-2.62	1.08059e-10	4.3593e-14	0.451849								0.875288	0.792077	0.963022	0.820114	0.981539	2.18592e+10	0.25009	0.903687	0.890517	0.826094		8310.67	131.253	1.05209	2488.55	1189.83	20.3224	60.307	547.397	2.47798e-09	113.114	211.735	256.404	7.52934	71.6228	1206.74	2.98961	622.149	8310.67	1189.83	547.397	211.735
138261-41-3	IMIDACLOPRID	Insecticide, Veterinary treatment	Neonicotinoid	0.013	53.319	3.71535	0.57	1.6665e-10	6.72296e-14	0.99918								1.07308	0.988422	1.11801	0.996536	1.10098	1.66407e+10	4.496	1.0556	1.67322	1.34671		6778.8	337.218	0.843094	2488.55	1024.89	16.7246	60.307	488.013	3.25507e-09	113.114	11.7778	256.404	6.44579	71.6228	642.247	1.83388	622.149	6778.8	1024.89	488.013	11.7778
138-86-3	LIMONENE	Insecticide, Repellent, Adjuvant, Veterinary treatment	Botanical insecticide	3.53	0.196359	37153.5	4.57	3221.9	1.29977	0.999551								5.3017	7.90239	4.43138	1766.18	3.6544	1.27747	95.2676	4.30324	18.4063	3.86808		1372.06	1.24188	0.105453	2488.55	258.572	0.00943655	60.307	147.026	42.4016	113.114	0.555833	256.404	1.58117	71.6228	58.3833	0.638481	622.149	1372.06	258.572	147.026	0.555833
139-40-2	PROPAZINE	Herbicide	Other pesticide class	0.145	4.78033	851.138	2.93	0.0004646	1.87428e-07	0.99995								4.932	6.97437	4.1417	41.2621	3.43116	207914	87.3316	4.0193	16.9434	3.80655		1474.91	30.2334	0.119485	2488.55	276.658	0.403922	60.307	156.592	0.000260524	113.114	0.606343	256.404	1.69287	71.6228	63.4243	0.648802	622.149	1474.91	276.658	156.592	0.606343
140-38-5	P-CHLOROPHENYLUREA	Metabolite	Other pesticide class	0.0218	31.7957	63.0957	1.8	0.00211686	8.53981e-07	0.999916								2.83727	3.10894	2.50036	3.81801	2.16627	4415.76	42.3661	2.41052	8.65431	3.19422		2563.81	201.094	0.268044	2488.55	458.268	4.36527	60.307	248.026	0.0122667	113.114	1.24989	256.404	2.82269	71.6228	124.172	0.773176	622.149	2563.81	458.268	248.026	1.24989
140-56-7	FENAMINOSULF	Fungicide, Bactericide	Other pesticide class	0.00931	74.4519	0.0218776	-1.66	9.54712e-13	3.85148e-16	0.882574								0.876374	0.793136	0.963873	0.82104	0.982195	2.47639e+12	0.273399	0.904521	0.894814	0.829385		8300.37	470.874	1.05068	2488.55	1188.78	20.2995	60.307	547.032	2.18732e-11	113.114	193.684	256.404	7.52239	71.6228	1200.94	2.97774	622.149	8300.37	1188.78	547.032	193.684
140-57-8	ARAMITE	Insecticide, Miticide, Acaricide	Other pesticide class	3.77	0.183859	66069.3	4.82	0.293518	0.00011841	0.99923								5.30584	7.91336	4.43463	3140.13	3.6569	24929.8	95.3566	4.30642	18.4227	3.86873		1370.99	1.16282	0.105307	2488.55	258.383	0.00530764	60.307	146.925	0.00217277	113.114	0.555315	256.404	1.58	71.6228	58.3313	0.638375	622.149	1370.99	258.383	146.925	0.555315
140-67-0	Benzene, 1-methoxy-4-(2-propenyl)-	Insecticide, Semiochemical, Pheromone, Repellent	Botanical insecticide	1.26	0.550117	2951.21	3.47	18.3181	0.00738985	0.999929								5.19474	7.62374	4.34757	141.048	3.58981	17.9664	92.9716	4.22109	17.9831	3.85111		1400.31	3.47924	0.109308	2488.55	263.557	0.118163	60.307	149.671	3.01489	113.114	0.56956	256.404	1.61194	71.6228	59.7574	0.641295	622.149	1400.31	263.557	149.671	0.56956
141112-29-0	Isoxaflutole	Herbicide	Other pesticide class	0.319	2.17288	208.93	2.32	1.8685e-05	7.53786e-09	0.999947								4.08788	5.17484	3.48028	10.7474	2.92144	1.3644e+06	69.2118	3.37101	13.6031	3.62824		1779.46	13.7424	0.161036	2488.55	329.236	1.55077	60.307	183.913	3.97e-05	113.114	0.765085	256.404	2.01844	71.6228	78.9982	0.680688	622.149	1779.46	329.236	183.913	0.765085
141-66-2	DICROTOPHOS	Insecticide, Acaricide	Organophosphate	0.00957	72.4292	1	0	5.0803e-06	2.04948e-09	0.997062								0.930224	0.845915	1.00607	0.867515	1.01471	486691	1.42934	0.945879	1.1079	0.985974		7819.87	458.081	0.985127	2488.55	1138.92	19.212	60.307	529.502	0.000111296	113.114	37.047	256.404	7.19349	71.6228	969.959	2.50483	622.149	7819.87	1138.92	529.502	37.047
141776-32-1	SULFOSULFURON	Herbicide	Other pesticide class	0.00478	145.01	9.77237	0.99	2.3028e-06	9.28991e-10	0.999665								1.36046	1.28653	1.34319	1.28434	1.27451	1.49548e+06	10.6649	1.27631	2.81041	1.89712		5346.88	917.121	0.647737	2488.55	853.071	12.9769	60.307	421.568	3.62203e-05	113.114	4.96517	256.404	5.33113	71.6228	382.372	1.30181	622.149	5346.88	853.071	421.568	4.96517
1420-06-0	TRIFENMORPH	Insecticide, Molluscicide	Morpholine	0.125	5.54518	16218.1	4.21	0.0610581	2.46319e-05	0.999783								5.28952	7.87023	4.42184	771.428	3.64705	29447	95.0063	4.29389	18.3581	3.86618		1375.21	35.0707	0.105884	2488.55	259.13	0.0216049	60.307	147.322	0.00183947	113.114	0.557362	256.404	1.58462	71.6228	58.5365	0.638795	622.149	1375.21	259.13	147.322	0.557362
1420-07-1	Dinoterb	Herbicide	Other pesticide class	0.0977	7.09465	4365.16	3.64	0.00868351	3.50308e-06	0.999914								5.23178	7.71927	4.3766	208.232	3.61218	55928.7	93.7667	4.24954	18.1296	3.85706		1390.39	44.8704	0.107955	2488.55	261.809	0.080039	60.307	148.744	0.000968495	113.114	0.56473	256.404	1.60115	71.6228	59.2743	0.640305	622.149	1390.39	261.809	148.744	0.56473
14214-32-5	DIFENOXURON	Herbicide	Other pesticide class	0.134	5.17274	346.737	2.54	5.51662e-05	2.22551e-08	0.999951								4.48334	5.96851	3.79015	17.2953	3.16024	738701	77.7006	3.67473	15.168	3.71942		1622.5	32.7152	0.139622	2488.55	302.319	0.963652	60.307	170.016	7.3327e-05	113.114	0.681499	256.404	1.85161	71.6228	70.8481	0.664001	622.149	1622.5	302.319	170.016	0.681499
142459-58-3	Fluthiamide	Herbicide	Other pesticide class	0.533	1.30046	1584.89	3.2	0.00058176	2.34692e-07	0.999944								5.09915	7.3819	4.27268	76.1267	3.53209	305686	90.9198	4.14768	17.6048	3.83539		1426.56	8.22484	0.112889	2488.55	268.177	0.218933	60.307	152.117	0.000177197	113.114	0.582413	256.404	1.64047	71.6228	61.0413	0.643923	622.149	1426.56	268.177	152.117	0.582413
142-59-6	NABAM	Fungicide, Algicide, Bactericide	Dithiocarbamate	0.0183	37.8769	5.7544e-05	-4.24	1.62001e-13	6.53539e-17	0.0193911								0.875158	0.791949	0.96292	0.820003	0.981461	1.45791e+13	0.247288	0.903587	0.89	0.825698		8311.91	239.554	1.05226	2488.55	1189.96	20.3251	60.307	547.441	3.71536e-12	113.114	214.135	256.404	7.53017	71.6228	1207.44	2.99104	622.149	8311.91	1189.96	547.441	214.135
143390-89-0	BAS 490F	Fungicide, Bacteriacide	Strobilurin	0.248	2.79495	2511.89	3.4	0.00035855	1.44645e-07	0.999934								5.175	7.57326	4.3321	120.173	3.57789	782232	92.5479	4.20593	17.9049	3.84791		1405.65	17.6768	0.110036	2488.55	264.498	0.138689	60.307	150.17	6.92463e-05	113.114	0.572168	256.404	1.61775	71.6228	60.0181	0.641828	622.149	1405.65	264.498	150.17	0.572168
143-50-0	Kepone	Insecticide, Fungicide, Metabolite	Organochlorine	13.2	0.0525112	257040	5.41	0.0054338	2.19209e-06	0.997118								5.3098	7.92386	4.43773	12214.1	3.65929	5.23775e+06	95.4416	4.30947	18.4384	3.86934		1369.96	0.332109	0.105168	2488.55	258.202	0.00136454	60.307	146.829	1.03416e-05	113.114	0.55482	256.404	1.57889	71.6228	58.2817	0.638273	622.149	1369.96	258.202	146.829	0.55482
144-21-8	DSMA	Herbicide	Other pesticide class	0.00745	93.0399	4.57088e-06	-5.34	5.67685e-09	2.29014e-12	0.00156829								0.875155	0.791947	0.962917	0.82	0.981459	4.16044e+08	0.247224	0.903585	0.889989	0.825689		8311.94	588.435	1.05226	2488.55	1189.96	20.3252	60.307	547.442	1.30195e-07	113.114	214.19	256.404	7.53019	71.6228	1207.45	2.99107	622.149	8311.94	1189.96	547.442	214.19
14437-17-3	CHLORFENPROP METHYL	Herbicide	Other pesticide class	0.263	2.63554	2511.89	3.4	1.57731	0.000636315	0.999934								5.175	7.57326	4.3321	120.173	3.57789	177.815	92.5479	4.20593	17.9049	3.84791		1405.65	16.6686	0.110036	2488.55	264.498	0.138689	60.307	150.17	0.304624	113.114	0.572168	256.404	1.61775	71.6228	60.0181	0.641828	622.149	1405.65	264.498	150.17	0.572168
14484-64-1	FERBAM	Fungicide	Dithiocarbamate	0.0237	29.2467	0.0251189	-1.6	2.81491e-07	1.13559e-10	0.896149								0.876555	0.793312	0.964014	0.821194	0.982304	8.40027e+06	0.277276	0.90466	0.895528	0.829932		8298.66	184.972	1.05045	2488.55	1188.61	20.2957	60.307	546.971	6.44821e-06	113.114	190.975	256.404	7.52124	71.6228	1199.99	2.97578	622.149	8298.66	1188.61	546.971	190.975
145-73-3	ENDOTHAL	Herbicide, Algicide, Plant growth regulator	Other pesticide class	1.59	0.435942	81.2831	1.91	3.8885e-11	1.56869e-14	0.999926								3.11702	3.52135	2.71956	4.68219	2.3352	2.92174e+11	48.3712	2.62537	9.7613	3.31795		2333.71	2.75713	0.236652	2488.55	421.331	3.55959	60.307	230.084	1.85392e-10	113.114	1.09472	256.404	2.59169	71.6228	110.09	0.744345	622.149	2333.71	421.331	230.084	1.09472
14698-29-4	OXOLINIC ACID	Veterinary treatment; Fungicide	Other pesticide class	0.0268	25.8637	8.70964	0.94	1.11027e-05	4.47903e-09	0.999629								1.31289	1.23609	1.30591	1.23384	1.24578	299578	9.64376	1.23978	2.62217	1.81861		5540.61	163.576	0.674168	2488.55	877.42	13.508	60.307	431.288	0.00018081	113.114	5.4909	256.404	5.48822	71.6228	409.821	1.35801	622.149	5540.61	877.42	431.288	5.4909
14816-18-3	PHOXIM	Insecticide, Disinfectant	Organophosphate	1.1	0.630134	24547.1	4.39	0.15251	6.15253e-05	0.999691								5.29685	7.88956	4.42758	1167.18	3.65147	17835.8	95.1635	4.29951	18.3871	3.86733		1373.31	3.98531	0.105625	2488.55	258.794	0.0142794	60.307	147.144	0.00303697	113.114	0.556441	256.404	1.58254	71.6228	58.4443	0.638606	622.149	1373.31	258.794	147.144	0.556441
14816-20-7	Chlorphoxim	Insecticide	Organophosphate	7.34	0.0944342	107152	5.03	0.0349703	1.41077e-05	0.998775								5.30789	7.91878	4.43623	5092.18	3.65814	339312	95.4004	4.30799	18.4308	3.86904		1370.46	0.597253	0.105235	2488.55	258.29	0.00327299	60.307	146.876	0.000159637	113.114	0.555059	256.404	1.57943	71.6228	58.3057	0.638322	622.149	1370.46	258.29	146.876	0.555059
148-24-3	8-QUINOLINOL	Fungicide, Bactericide	Other pesticide class	0.0426	16.2711	104.713	2.02	0.05757	2.32248e-05	0.999934								3.39601	3.95891	2.93816	5.79547	2.50366	242.405	54.3601	2.83964	10.8653	3.42328		2141.99	102.907	0.210495	2488.55	389.983	2.87581	60.307	214.602	0.223455	113.114	0.974114	256.404	2.39613	71.6228	98.9039	0.721443	622.149	2141.99	389.983	214.602	0.974114
148-79-8	THIABENDAZOLE	Fungicide	Imidazole	0.193	3.59144	295.121	2.47	2.1412e-06	8.63798e-10	0.99995								4.36929	5.73133	3.70079	14.8428	3.09137	1.63631e+07	75.2526	3.58714	14.7167	3.69467		1664.85	22.7142	0.1454	2488.55	309.619	1.12288	60.307	173.804	3.3103e-06	113.114	0.703669	256.404	1.89682	71.6228	73.0206	0.668449	622.149	1664.85	309.619	173.804	0.703669
149979-41-9	BAS 620H	Herbicide	Other pesticide class	0.595	1.16495	1778.28	3.25	4.76895e-07	1.92388e-10	0.999942								5.12122	7.43716	4.28997	85.3155	3.54542	4.178e+08	91.3936	4.16463	17.6922	3.83907		1420.41	7.3678	0.11205	2488.55	267.096	0.195353	60.307	151.545	1.29647e-07	113.114	0.579394	256.404	1.6338	71.6228	60.74	0.643306	622.149	1420.41	267.096	151.545	0.579394
150-50-5	MERPHOS	Plant growth regulator, Herbicide	Organophosphate	12.9	0.0537323	4.67735e+07	7.67	150.509	0.060718	0.658231								5.31117	7.92748	4.4388	2.22246e+06	3.66012	34407.3	95.4709	4.31051	18.4438	3.86955		1369.61	0.339833	0.10512	2488.55	258.14	7.4992e-06	60.307	146.796	0.00157428	113.114	0.554649	256.404	1.5785	71.6228	58.2647	0.638238	622.149	1369.61	258.14	146.796	0.554649
150-68-5	MONURON	Herbicide	Other pesticide class	0.0632	10.9675	87.0964	1.94	5.7772e-05	2.33063e-08	0.999929								3.19356	3.63868	2.77953	4.95841	2.38141	207797	50.0142	2.68416	10.0642	3.34846		2277.78	69.3646	0.229021	2488.55	412.24	3.36129	60.307	225.619	0.000260671	113.114	1.05876	256.404	2.53494	71.6228	106.777	0.737561	622.149	2277.78	412.24	225.619	1.05876
152-16-9	OCTAMETHYLPYROPHOSPHORAMIDE	Insecticide, Acaricide	Organophosphate	0.24	2.88811	0.0977237	-1.01	3.81667e-05	1.53971e-08	0.971048								0.880597	0.797257	0.967182	0.824643	0.984745	62165.2	0.364049	0.907765	0.911524	0.842133		8260.57	18.266	1.04525	2488.55	1184.71	20.2108	60.307	545.615	0.000871334	113.114	145.455	256.404	7.49552	71.6228	1178.93	2.93267	622.149	8260.57	1184.71	545.615	145.455
15263-53-3	Cartap	Insecticide	Other pesticide class	3.75e-05	18483.9	0.112202	-0.95	1.50315e-09	6.06399e-13	0.974685								0.881402	0.798043	0.967813	0.825331	0.985231	1.57951e+09	0.381333	0.908383	0.914711	0.844555		8253.02	116902	1.04422	2488.55	1183.94	20.1939	60.307	545.346	3.42934e-08	113.114	138.862	256.404	7.49042	71.6228	1174.82	2.92426	622.149	8253.02	1183.94	545.346	138.862
15299-99-7	N,N-DIETHYL-2-(1-NAPHTHALENYLOXY)PROPANAMIDE	Herbicide	Other pesticide class	0.739	0.937953	2290.87	3.36	8.4941e-05	3.42667e-08	0.999936								5.1623	7.54093	4.32216	109.671	3.57022	3.01384e+06	92.2753	4.19618	17.8547	3.84584		1409.11	5.93212	0.110508	2488.55	265.107	0.151969	60.307	150.492	1.79726e-05	113.114	0.573858	256.404	1.62151	71.6228	60.187	0.642174	622.149	1409.11	265.107	150.492	0.573858
15310-01-7	BENZAMIDE, 2-IODO-N-PHENYL	Fungicide	Other pesticide class	0.117	5.92433	7413.1	3.87	0.000284354	1.14714e-07	0.99988								5.26408	7.80339	4.4019	353.056	3.63168	2.89468e+06	94.4601	4.27435	18.2574	3.86219		1381.86	37.4687	0.106791	2488.55	260.304	0.0472069	60.307	147.946	1.87125e-05	113.114	0.560585	256.404	1.59186	71.6228	58.8593	0.639456	622.149	1381.86	260.304	147.946	0.560585
15457-05-3	FLUORODIFEN	Herbicide	Other pesticide class	1.9	0.364814	4466.84	3.65	0.0450742	1.81837e-05	0.999913								5.23355	7.72387	4.37799	213.063	3.61325	11024.4	93.8049	4.2509	18.1367	3.85734		1389.92	2.30728	0.107891	2488.55	261.726	0.0782241	60.307	148.7	0.00491335	113.114	0.564501	256.404	1.60064	71.6228	59.2513	0.640258	622.149	1389.92	261.726	148.7	0.564501
15545-48-9	CHLORTOLURON	Herbicide	Other pesticide class	0.0542	12.7887	257.04	2.41	1.4544e-05	5.86731e-09	0.999949								4.26273	5.51593	3.61729	13.0333	3.02702	2.11911e+06	72.9651	3.5053	14.295	3.67045		1706.47	80.8827	0.151078	2488.55	316.766	1.27877	60.307	177.498	2.5561e-05	113.114	0.725729	256.404	1.94111	71.6228	75.1746	0.67286	622.149	1706.47	316.766	177.498	0.725729
1563-38-8	CARBOFURAN PHENOL	Metabolite	Other pesticide class	0.11	6.30134	120.226	2.08	0.0421512	1.70046e-05	0.999938								3.54473	4.20377	3.05469	6.5326	2.59347	371.825	57.5525	2.95386	11.4538	3.47337		2052.12	39.8531	0.198235	2488.55	375.106	2.55131	60.307	207.171	0.145678	113.114	0.92008	256.404	2.30348	71.6228	93.8222	0.711038	622.149	2052.12	375.106	207.171	0.92008
1563-66-2	Carbofuran	Insecticide, Nematicide, Acaricide, Metabolite	Carbamate	0.0813	8.5258	208.93	2.32	0.00031209	1.25903e-07	0.999947								4.08788	5.17484	3.48028	10.7474	2.92144	81687.3	69.2118	3.37101	13.6031	3.62824		1779.46	53.9218	0.161036	2488.55	329.236	1.55077	60.307	183.913	0.000663098	113.114	0.765085	256.404	2.01844	71.6228	78.9982	0.680688	622.149	1779.46	329.236	183.913	0.765085
15662-33-6	Ryanodine	Insecticide	Botanical insecticide	0.0149	46.5199	56.2341	1.75	4.82091e-15	1.94484e-18	0.999911								2.71226	2.93256	2.4024	3.49198	2.09078	1.78138e+15	39.6826	2.31451	8.15962	3.13179		2681.98	294.217	0.284166	2488.55	476.953	4.77284	60.307	256.981	3.04071e-14	113.114	1.33441	256.404	2.93978	71.6228	131.7	0.788588	622.149	2681.98	476.953	256.981	1.33441
1570-64-5	2-METHYL-4-CHLOROPHENOL	Metabolite	Other pesticide class	0.209	3.31649	602.56	2.78	0.11413	4.60421e-05	0.999952								4.79381	6.65149	4.03342	29.4508	3.34772	605.232	84.3654	3.91318	16.3966	3.78131		1517.42	20.9753	0.125285	2488.55	284.085	0.565915	60.307	160.495	0.0894973	113.114	0.627662	256.404	1.73878	71.6228	65.5394	0.653133	622.149	1517.42	284.085	160.495	0.627662
1582-09-8	trifluralin	Herbicide	Other pesticide class	0.561	1.23556	218776	5.34	10.403	0.00419676	0.997541								5.30956	7.92323	4.43755	10396	3.65915	2328.61	95.4365	4.30928	18.4374	3.8693		1370.02	7.81433	0.105176	2488.55	258.213	0.00160317	60.307	146.835	0.0232614	113.114	0.55485	256.404	1.57896	71.6228	58.2847	0.638279	622.149	1370.02	258.213	146.835	0.55485
15879-93-3	CHLORALOSE	Rodenticide, Avicide, Repellent	Other pesticide class	0.12	5.77623	10.4713	1.02	1.02247e-08	4.12483e-12	0.999685								1.39113	1.31929	1.36722	1.31755	1.29303	3.44378e+08	11.3233	1.29987	2.93178	1.94556		5228.99	36.532	0.631654	2488.55	838.076	12.6498	60.307	415.529	1.57289e-07	113.114	4.67646	256.404	5.23452	71.6228	366.542	1.2694	622.149	5228.99	838.076	415.529	4.67646
1593-77-7	DODEMORPH	Fungicide	Morpholine	2.93	0.236569	501187	5.7	0.0626694	2.5282e-05	0.994431								5.31047	7.92563	4.43826	23814.9	3.6597	885474	95.456	4.30998	18.441	3.86945		1369.79	1.49619	0.105144	2488.55	258.172	0.000699842	60.307	146.813	6.11725e-05	113.114	0.554736	256.404	1.5787	71.6228	58.2734	0.638256	622.149	1369.79	258.172	146.813	0.554736
1596-84-5	DAMINOZIDE	Plant growth regulator	Other pesticide class	0.324	2.13934	0.0316228	-1.5	4.2723e-05	1.72352e-08	0.915701								0.876917	0.793666	0.964298	0.821503	0.982523	55364.1	0.285056	0.904938	0.896963	0.831029		8295.23	13.5304	1.04998	2488.55	1188.26	20.288	60.307	546.849	0.000978372	113.114	185.763	256.404	7.51893	71.6228	1198.07	2.97185	622.149	8295.23	1188.26	546.849	185.763
15972-60-8	ALACHLOR	Herbicide	Other pesticide class	0.271	2.55774	3311.31	3.52	0.00084032	3.39e-07	0.999925								5.2071	7.65552	4.35726	158.158	3.59728	439093	93.237	4.23059	18.032	3.85311		1396.98	16.1765	0.108854	2488.55	262.971	0.10538	60.307	149.361	0.00012336	113.114	0.567938	256.404	1.60833	71.6228	59.5953	0.640963	622.149	1396.98	262.971	149.361	0.567938
1610-18-0	PROMETON	Herbicide	Other pesticide class	0.0972	7.13114	977.237	2.99	9.1809e-05	3.70374e-08	0.999949								4.97724	7.0828	4.17715	47.2537	3.45848	1.20422e+06	88.3028	4.05405	17.1224	3.81453		1461.5	45.1012	0.117656	2488.55	274.31	0.352706	60.307	155.355	4.49807e-05	113.114	0.599674	256.404	1.67836	71.6228	62.7611	0.647444	622.149	1461.5	274.31	155.355	0.599674
161050-58-4	RH-2485	Insecticide	Other pesticide class	1.92	0.361014	5011.87	3.7	1.71957e-06	6.93707e-10	0.999907								5.24186	7.74545	4.3845	238.961	3.61827	3.24068e+08	93.9832	4.25729	18.1695	3.85867		1387.72	2.28325	0.10759	2488.55	261.337	0.0697465	60.307	148.494	1.67146e-07	113.114	0.563429	256.404	1.59824	71.6228	59.1441	0.640039	622.149	1387.72	261.337	148.494	0.563429
16118-49-3	Carbetamide	Herbicide	Carbamate	0.00408	169.889	42.658	1.63	1.27811e-05	5.15612e-09	0.999894								2.42355	2.54256	2.17618	2.84691	1.91645	554316	33.4852	2.09278	7.01717	2.96665		3001.47	1074.47	0.327754	2488.55	526.534	5.85431	60.307	280.358	9.7718e-05	113.114	1.58138	256.404	3.25126	71.6228	153.142	0.832488	622.149	3001.47	526.534	280.358	1.58138
1646-87-3	ALDICARB SULFOXIDE	Metabolite	Other pesticide class	0.0153	45.3037	0.165959	-0.78	9.7869e-05	3.94821e-08	0.982732								0.884389	0.80096	0.970153	0.827886	0.987035	24320.2	0.445455	0.910677	0.926531	0.853511		8225.14	286.525	1.04042	2488.55	1181.08	20.1316	60.307	544.349	0.00222723	113.114	118.874	256.404	7.47155	71.6228	1159.83	2.89357	622.149	8225.14	1181.08	544.349	118.874
1646-88-4	ALDICARB SULFONE	Insecticide, Nematicide, Metabolite	Carbamate	0.0162	42.7869	0.269153	-0.57	0.00034037	1.37311e-07	0.989268								0.890112	0.806553	0.974638	0.832789	0.990491	7026.53	0.568305	0.915073	0.949178	0.870556		8172.26	270.607	1.0332	2488.55	1175.65	20.0131	60.307	542.45	0.00770888	113.114	93.1769	256.404	7.43566	71.6228	1132.16	2.83692	622.149	8172.26	1175.65	542.45	93.1769
16484-77-8	Mecoprop-P	Herbicide	Other pesticide class	1.26	0.550117	1584.89	3.2	9.0496e-05	3.65077e-08	0.999944								5.09915	7.3819	4.27268	76.1267	3.53209	1.96512e+06	90.9198	4.14768	17.6048	3.83539		1426.56	3.47924	0.112889	2488.55	268.177	0.218933	60.307	152.117	2.7564e-05	113.114	0.582413	256.404	1.64047	71.6228	61.0413	0.643923	622.149	1426.56	268.177	152.117	0.582413
16672-87-0	ETHEPHON	Plant growth regulator	Other pesticide class	0.0272	25.4834	0.60256	-0.22	1.88813e-09	7.61707e-13	0.995157								0.908502	0.824563	0.989047	0.848631	1.0016	1.28621e+09	0.963051	0.929196	1.02195	0.924335		8006.84	161.171	1.01064	2488.55	1158.52	19.6395	60.307	536.436	4.21135e-08	113.114	54.9845	256.404	7.32264	71.6228	1051.54	2.67186	622.149	8006.84	1158.52	536.436	54.9845
16752-77-5	METHOMYL	Insecticide, Acaricide, Metabolite	Carbamate	0.0926	7.48539	3.98107	0.6	1.9897e-06	8.02681e-10	0.999233								1.08657	1.00206	1.12857	1.00916	1.10912	1.40855e+06	4.78539	1.06595	1.72657	1.37722		6694.7	47.3417	0.83162	2488.55	1015.3	16.5154	60.307	484.431	3.84557e-05	113.114	11.0655	256.404	6.38318	71.6228	622.403	1.79325	622.149	6694.7	1015.3	484.431	11.0655
1689-83-4	IOXYNIL	Herbicide, Metabolite	Other pesticide class	0.0603	11.495	2691.53	3.43	0.000136499	5.5066e-08	0.999932								5.18383	7.5958	4.33902	128.709	3.58322	2.20046e+06	92.7374	4.21271	17.9399	3.84934		1403.26	72.7005	0.10971	2488.55	264.076	0.129491	60.307	149.946	2.46161e-05	113.114	0.570998	256.404	1.61515	71.6228	59.9012	0.641589	622.149	1403.26	264.076	149.946	0.570998
1689-84-5	BROMOXYNIL	Herbicide, Metabolite	Other pesticide class	0.237	2.92467	2454.71	3.39	1.3332e-05	5.37837e-09	0.999935								5.17192	7.56542	4.3297	117.456	3.57604	2.05625e+07	92.4819	4.20357	17.8928	3.84741		1406.48	18.4972	0.11015	2488.55	264.645	0.141897	60.307	150.248	2.63425e-06	113.114	0.572576	256.404	1.61866	71.6228	60.0589	0.641912	622.149	1406.48	264.645	150.248	0.572576
1689-99-2	Bromoxynil octanoate	Herbicide	Other pesticide class	0.638	1.08644	251189	5.4	3.2219	0.00129977	0.997183								5.30977	7.92378	4.43771	11936.1	3.65927	8632.52	95.4409	4.30944	18.4383	3.86934		1369.97	6.87122	0.105169	2488.55	258.204	0.00139632	60.307	146.83	0.00627472	113.114	0.554824	256.404	1.5789	71.6228	58.2821	0.638274	622.149	1369.97	258.204	146.83	0.554824
1698-60-8	CHLORIDAZON	Herbicide	Other pesticide class	0.212	3.26956	13.8038	1.14	3.3633e-05	1.35682e-08	0.999752								1.53107	1.47114	1.47687	1.47589	1.37753	115664	14.3271	1.40734	3.48551	2.14723		4751.08	20.6785	0.566453	2488.55	775.855	11.2926	60.307	390.04	0.00046831	113.114	3.696	256.404	4.83478	71.6228	308.311	1.15018	622.149	4751.08	775.855	390.04	3.696
1702-17-6	3,6-DICHLOROPICOLINIC ACID	Herbicide	Other pesticide class	0.0482	14.3806	11.4815	1.06	0.00030603	1.23458e-07	0.99971								1.43464	1.36607	1.40131	1.36555	1.3193	11871.4	12.2571	1.33328	3.10392	2.01151		5070.43	90.951	0.610022	2488.55	817.69	12.2051	60.307	407.256	0.00456277	113.114	4.32018	256.404	5.10334	71.6228	346.214	1.22778	622.149	5070.43	817.69	407.256	4.32018
17109-49-8	EDIFENPHOS	Fungicide	Organophosphate	0.101	6.86284	3019.95	3.48	7.6861e-05	3.10071e-08	0.999929								5.19732	7.63037	4.3496	144.314	3.59137	4.3809e+06	93.027	4.22308	17.9933	3.85153		1399.61	43.4044	0.109213	2488.55	263.434	0.115489	60.307	149.606	1.23643e-05	113.114	0.569221	256.404	1.61119	71.6228	59.7235	0.641225	622.149	1399.61	263.434	149.606	0.569221
173584-44-6	DPX-MP062	Insecticide	Other pesticide class	0.121	5.72849	162181	5.21	0.000489263	1.97378e-07	0.998166								5.309	7.92173	4.4371	7706.9	3.65881	3.67051e+07	95.4244	4.30885	18.4352	3.86922		1370.17	36.2301	0.105196	2488.55	258.239	0.00216256	60.307	146.849	1.47572e-06	113.114	0.55492	256.404	1.57911	71.6228	58.2918	0.638294	622.149	1370.17	258.239	146.849	0.55492
1746-81-2	MONOLINURON	Herbicide	Other pesticide class	0.0742	9.34161	199.526	2.3	0.004646	1.87428e-06	0.999946								4.04666	5.09658	3.44799	10.3006	2.89655	5263.17	68.327	3.33935	13.44	3.6178		1797.59	59.0814	0.163508	2488.55	332.32	1.61804	60.307	185.493	0.0102916	113.114	0.774993	256.404	2.03757	71.6228	79.9569	0.682651	622.149	1797.59	332.32	185.493	0.774993
17606-31-4	BENSULTAP	Insecticide	Other pesticide class	0.0359	19.3077	2290.87	3.36	0.1212	4.88942e-05	0.999936								5.1623	7.54093	4.32216	109.671	3.57022	2112.2	92.2753	4.19618	17.8547	3.84584		1409.11	122.113	0.110508	2488.55	265.107	0.151969	60.307	150.492	0.0256446	113.114	0.573858	256.404	1.62151	71.6228	60.187	0.642174	622.149	1409.11	265.107	150.492	0.573858
17804-35-2	Benomyl	Fungicide, Miticide	Imidazole	0.0476	14.5619	131.826	2.12	4.9793e-07	2.00874e-10	0.99994								3.64166	4.36797	3.13064	7.08374	2.652	3.40552e+07	59.6332	3.02831	11.8374	3.50404		1997.5	92.0975	0.190783	2488.55	366.006	2.35281	60.307	202.599	1.59055e-06	113.114	0.887976	256.404	2.24685	71.6228	90.7821	0.704814	622.149	1997.5	366.006	202.599	0.887976
18181-70-9	IODOFENPHOS	Insecticide, Acaricide, Veterinary treatment	Other pesticide class	7.24	0.0957386	323594	5.51	0.45248	0.000182539	0.996384								5.31009	7.92461	4.43795	15376.5	3.65946	79184.8	95.4477	4.30968	18.4395	3.86939		1369.89	0.605503	0.105158	2488.55	258.19	0.00108391	60.307	146.822	0.000684054	113.114	0.554785	256.404	1.57881	71.6228	58.2782	0.638266	622.149	1369.89	258.19	146.822	0.554785
18181-80-1	ISOPROPYL 4,4'DIBROMOBENZILATE	Acaricide	Other pesticide class	2.15	0.322394	251189	5.4	0.046662	1.88243e-05	0.997183								5.30977	7.92378	4.43771	11936.1	3.65927	596055	95.4409	4.30944	18.4383	3.86934		1369.97	2.039	0.105169	2488.55	258.204	0.00139632	60.307	146.83	9.08753e-05	113.114	0.554824	256.404	1.5789	71.6228	58.2821	0.638274	622.149	1369.97	258.204	146.83	0.554824
1836-75-5	NITROFEN	Herbicide	Other pesticide class	6.83	0.101486	43651.6	4.64	0.30304	0.000122252	0.999479								5.30311	7.90612	4.43249	2074.94	3.65525	15956	95.2979	4.30432	18.4119	3.8683		1371.69	0.641851	0.105404	2488.55	258.508	0.00803236	60.307	146.992	0.00339475	113.114	0.555657	256.404	1.58078	71.6228	58.3656	0.638445	622.149	1371.69	258.508	146.992	0.555657
18467-77-1	,ALPHA,-L-XYLO-2-HEXULOFURANOSONIC ACID, 2,3:4,6	Plant growth regulator	Other pesticide class	0.237	2.92467	22.3872	1.35	0.000219392	8.85066e-08	0.999833								1.84935	1.83192	1.72626	1.88374	1.56972	22063.1	21.1594	1.65178	4.745	2.51336		3933.39	18.4972	0.454896	2488.55	663.766	8.84767	60.307	342.285	0.00245508	113.114	2.50257	256.404	4.11928	71.6228	226.475	0.982629	622.149	3933.39	663.766	342.285	2.50257
18530-56-8	NOREA	Herbicide	Other pesticide class	0.105	6.6014	190.546	2.28	0.000743076	2.9977e-07	0.999946								4.00462	5.01757	3.41504	9.87386	2.87117	31569.3	67.4245	3.30706	13.2736	3.60696		1816.46	41.7509	0.166083	2488.55	335.525	1.68796	60.307	187.134	0.0017158	113.114	0.785366	256.404	2.05746	71.6228	80.9591	0.684703	622.149	1816.46	335.525	187.134	0.785366
1861-32-1	Dimethyl tetrachloroterephthalate	Herbicide	Other pesticide class	0.0955	7.25809	19054.6	4.28	0.22018	8.88246e-05	0.999752								5.29273	7.8787	4.42436	906.206	3.64899	9592.25	95.0752	4.29635	18.3708	3.86668		1374.38	45.9041	0.10577	2488.55	258.983	0.0183917	60.307	147.244	0.00564692	113.114	0.556958	256.404	1.58371	71.6228	58.496	0.638712	622.149	1374.38	258.983	147.244	0.556958
1861-40-1	Benefin	Herbicide	Other pesticide class	0.586	1.18285	194984	5.29	29.391	0.0118569	0.997804								5.30937	7.9227	4.43739	9265.57	3.65903	734.591	95.4323	4.30913	18.4367	3.86927		1370.07	7.48096	0.105183	2488.55	258.222	0.00179877	60.307	146.84	0.0737371	113.114	0.554874	256.404	1.57901	71.6228	58.2872	0.638284	622.149	1370.07	258.222	146.84	0.554874
18691-97-9	Methabenzthiazuron	Herbicide	Other pesticide class	0.00975	71.092	436.516	2.64	5.6358e-05	2.27358e-08	0.999952								4.62735	6.27829	3.90299	21.5612	3.2472	899453	80.7921	3.78533	15.7379	3.74907		1572.01	449.625	0.132732	2488.55	293.578	0.772994	60.307	165.463	6.02218e-05	113.114	0.655422	256.404	1.79751	71.6228	68.2826	0.658749	622.149	1572.01	293.578	165.463	0.655422
18854-01-8	ISOXATHION	Insecticide	Organophosphate	1.29	0.537323	5370.32	3.73	0.188646	7.6103e-05	0.999903								5.24642	7.75731	4.38807	255.992	3.62102	3164.37	94.0811	4.26079	18.1876	3.85939		1386.51	3.39833	0.107426	2488.55	261.125	0.0651061	60.307	148.381	0.0171177	113.114	0.562843	256.404	1.59693	71.6228	59.0854	0.639919	622.149	1386.51	261.125	148.381	0.562843
1897-45-6	Chlorothalonil	Fungicide	Other pesticide class	1.29	0.537323	1122.02	3.05	0.202	8.14904e-05	0.999948								5.01748	7.18039	4.20868	54.1331	3.48277	626.673	89.1665	4.08495	17.2816	3.82152		1449.78	3.39833	0.116057	2488.55	272.255	0.307883	60.307	154.271	0.0864354	113.114	0.593865	256.404	1.66567	71.6228	62.1829	0.64626	622.149	1449.78	272.255	154.271	0.593865
19044-88-3	ORYZALIN	Herbicide	Other pesticide class	0.0386	17.9572	5370.32	3.73	5.52329e-05	2.22819e-08	0.999903								5.24642	7.75731	4.38807	255.992	3.62102	1.08078e+07	94.0811	4.26079	18.1876	3.85939		1386.51	113.571	0.107426	2488.55	261.125	0.0651061	60.307	148.381	5.01182e-06	113.114	0.562843	256.404	1.59693	71.6228	59.0854	0.639919	622.149	1386.51	261.125	148.381	0.562843
1910-42-5	Paraquat dichloride	Herbicide	Other pesticide class	0.11	6.30134	0.00194984	-2.71	4.94727e-09	1.99582e-12	0.401209								0.875263	0.792052	0.963002	0.820093	0.981524	4.77442e+08	0.249553	0.903668	0.890418	0.826018		8310.91	39.8531	1.05212	2488.55	1189.86	20.3229	60.307	547.405	1.13452e-07	113.114	212.191	256.404	7.5295	71.6228	1206.87	2.98988	622.149	8310.91	1189.86	547.405	212.191
1912-24-9	atrazine	Herbicide	Other pesticide class	0.117	5.92433	407.38	2.61	0.00023836	9.61587e-08	0.999951								4.58644	6.18908	3.87093	20.1768	3.22249	199134	79.9138	3.75391	15.5759	3.74082		1586.03	37.4687	0.134646	2488.55	296.01	0.826031	60.307	166.732	0.000272011	113.114	0.662625	256.404	1.81256	71.6228	68.9923	0.660202	622.149	1586.03	296.01	166.732	0.662625
1912-26-1	TRIETAZINE	Herbicide	Other pesticide class	0.1	6.93147	2187.76	3.34	0.162328	6.54862e-05	0.999937								5.15553	7.52374	4.31685	104.772	3.56614	1506.72	92.13	4.19098	17.8279	3.84473		1410.96	43.8384	0.11076	2488.55	265.433	0.159075	60.307	150.665	0.0359501	113.114	0.574763	256.404	1.62353	71.6228	60.2775	0.642359	622.149	1410.96	265.433	150.665	0.574763
1918-00-9	dicamba	Herbicide	Other pesticide class	2.48	0.279495	162.181	2.21	0.00022018	8.88246e-08	0.999943								3.85131	4.73624	3.29492	8.52608	2.77859	92278.8	64.1335	3.18932	12.667	3.56562		1888.77	1.76768	0.175948	2488.55	347.758	1.95479	60.307	193.368	0.000586989	113.114	0.825667	256.404	2.13342	71.6228	84.8365	0.692641	622.149	1888.77	347.758	193.368	0.825667
1918-13-4	CHLORTHIAMID	Herbicide	Other pesticide class	0.238	2.91238	912.011	2.96	2.8886e-06	1.16531e-09	0.99995								4.95527	7.02999	4.15994	44.1545	3.44521	3.57739e+07	87.8313	4.03718	17.0355	3.81067		1467.98	18.4195	0.11854	2488.55	275.445	0.377463	60.307	155.953	1.51414e-06	113.114	0.602893	256.404	1.68538	71.6228	63.0814	0.6481	622.149	1467.98	275.445	155.953	0.602893
1918-16-7	PROPACHLOR	Herbicide	Other pesticide class	0.0954	7.26569	151.356	2.18	0.03636	1.46683e-05	0.999942								3.78287	4.61399	3.24129	8.01174	2.73727	525.837	62.6644	3.13676	12.3962	3.54619		1922.94	45.9522	0.18061	2488.55	353.512	2.08028	60.307	196.288	0.10301	113.114	0.845023	256.404	2.16917	71.6228	86.6899	0.696436	622.149	1922.94	353.512	196.288	0.845023
1929-77-7	VERNOLATE	Herbicide	Other pesticide class	0.168	4.12588	6918.31	3.84	3.1209	0.00125903	0.999886								5.26075	7.79468	4.39929	329.546	3.62967	246.19	94.3886	4.27179	18.2443	3.86166		1382.74	26.0943	0.10691	2488.55	260.458	0.0505747	60.307	148.028	0.22002	113.114	0.56101	256.404	1.59281	71.6228	58.9019	0.639543	622.149	1382.74	260.458	148.028	0.56101
1929-82-4	NITRAPYRIN	Bactericide	Other pesticide class	0.95	0.729629	2570.4	3.41	2.0503	0.000827128	0.999933								5.178	7.58093	4.33446	122.953	3.57971	139.954	92.6124	4.20824	17.9168	3.8484		1404.83	4.61457	0.109925	2488.55	264.354	0.135553	60.307	150.094	0.387033	113.114	0.571769	256.404	1.61687	71.6228	59.9783	0.641747	622.149	1404.83	264.354	150.094	0.571769
1929-88-0	Benzthiazuron	Herbicide	Other pesticide class	0.00411	168.649	125.893	2.1	0.00153365	6.18702e-07	0.999939								3.59345	4.28583	3.09287	6.80183	2.62288	10628.4	58.5983	2.99128	11.6466	3.48897		2024.3	1066.63	0.194439	2488.55	370.476	2.45032	60.307	204.848	0.00509642	113.114	0.90366	256.404	2.27467	71.6228	92.2692	0.707859	622.149	2024.3	370.476	204.848	0.90366
19666-30-9	OXADIAZON	Herbicide	Other pesticide class	23.1	0.0300064	63095.7	4.8	0.0073427	2.96218e-06	0.999263								5.30559	7.91269	4.43443	2998.83	3.65675	951708	95.3512	4.30623	18.4217	3.86869		1371.05	0.189777	0.105316	2488.55	258.395	0.00555771	60.307	146.931	5.69152e-05	113.114	0.555346	256.404	1.58008	71.6228	58.3345	0.638381	622.149	1371.05	258.395	146.931	0.555346
1967-16-4	CHLORBUFAM	Herbicide	Other pesticide class	0.129	5.37323	1047.13	3.02	0.00086961	3.50816e-07	0.999949								4.99796	7.13291	4.19338	50.5747	3.47099	136034	88.7475	4.06996	17.2044	3.81814		1455.44	33.9833	0.116829	2488.55	273.248	0.329546	60.307	154.795	0.000398186	113.114	0.596669	256.404	1.6718	71.6228	62.4621	0.646832	622.149	1455.44	273.248	154.795	0.596669
1982-47-4	CHLOROXURON	Herbicide	Other pesticide class	0.472	1.46853	5011.87	3.7	4.0703e-05	1.64203e-08	0.999907								5.24186	7.74545	4.3845	238.961	3.61827	1.36909e+07	93.9832	4.25729	18.1695	3.85867		1387.72	9.2878	0.10759	2488.55	261.337	0.0697465	60.307	148.494	3.95641e-06	113.114	0.563429	256.404	1.59824	71.6228	59.1441	0.640039	622.149	1387.72	261.337	148.494	0.563429
1982-49-6	SIDURON	Herbicide	Other pesticide class	0.0545	12.7183	6309.57	3.8	6.8579e-06	2.7666e-09	0.999893								5.25594	7.78213	4.39553	300.621	3.62677	1.02209e+08	94.2854	4.2681	18.2253	3.8609		1384	80.4374	0.107083	2488.55	260.682	0.0554407	60.307	148.146	5.29962e-07	113.114	0.561623	256.404	1.59419	71.6228	58.9633	0.639669	622.149	1384	260.682	148.146	0.561623
19937-59-8	METOXURON	Herbicide	Other pesticide class	0.211	3.28506	43.6516	1.64	0.0014443	5.82656e-07	0.999896								2.44684	2.57315	2.19443	2.89412	1.93051	4981.49	33.9851	2.11067	7.10933	2.9812		2972.91	20.7765	0.323857	2488.55	522.155	5.7588	60.307	278.316	0.0108736	113.114	1.55812	256.404	3.22371	71.6228	151.156	0.828424	622.149	2972.91	522.155	278.316	1.55812
2008-41-5	BUTYLATE	Herbicide	Other pesticide class	0.209	3.31649	14125.4	4.15	8.5345	0.00344297	0.999806								5.28633	7.86183	4.41934	671.992	3.64512	183.523	94.9378	4.29144	18.3455	3.86568		1376.04	20.9753	0.105997	2488.55	259.277	0.0248019	60.307	147.4	0.29515	113.114	0.557764	256.404	1.58552	71.6228	58.5768	0.638877	622.149	1376.04	259.277	147.4	0.557764
2008-58-4	2,6-DICHLOROBENZAMIDE	Metabolite	Other pesticide class	0.0555	12.4891	5.88844	0.77	4.40851e-05	1.77847e-08	0.999469								1.18087	1.0984	1.20247	1.09979	1.16607	68362.5	6.80982	1.13838	2.09976	1.5763		6160.04	78.9881	0.758676	2488.55	952.902	15.1544	60.307	460.773	0.000792345	113.114	7.77596	256.404	5.97705	71.6228	511.784	1.56677	622.149	6160.04	952.902	460.773	7.77596
20301-63-7	Phosphorodithioic acid, S-[2-(ethylsulfonyl)ethy	Metabolite	Other pesticide class	0.104	6.66488	7.07946	0.85	0.00294576	1.18837e-06	0.999552								1.23766	1.15722	1.24696	1.15638	1.20035	1067.85	8.02873	1.18199	2.32445	1.68525		5877.42	42.1523	0.720119	2488.55	918.901	14.4128	60.307	447.611	0.050725	113.114	6.59542	256.404	5.75652	71.6228	462.311	1.46548	622.149	5877.42	918.901	447.611	6.59542
2032-59-9	AMINOCARB	Insecticide	Carbamate	0.0142	48.8132	79.4328	1.9	0.0145972	5.88876e-06	0.999926								3.09149	3.48265	2.69955	4.59428	2.31978	764.282	47.8231	2.60576	9.66026	3.30747		2352.99	308.721	0.239282	2488.55	424.454	3.6277	60.307	231.614	0.0708726	113.114	1.10727	256.404	2.6112	71.6228	111.241	0.746702	622.149	2352.99	424.454	231.614	1.10727
2032-65-7	METHIOCARB	Insecticide, Molluscicide, Bird repellent	Carbamate	0.0607	11.4192	831.764	2.92	0.00011918	4.80793e-08	0.99995								4.92393	6.9552	4.13538	40.3415	3.42629	792514	87.1585	4.01311	16.9115	3.80511		1477.32	72.2214	0.119814	2488.55	277.08	0.413139	60.307	156.814	6.83479e-05	113.114	0.607547	256.404	1.69548	71.6228	63.544	0.649047	622.149	1477.32	277.08	156.814	0.607547
2079-00-7	BLASTICIDIN-S	Fungicide	Other pesticide class	2.6e-05	26659.5	2.0893e-05	-4.68	9.85717e-18	3.97656e-21	0.00712853								0.875156	0.791947	0.962918	0.820001	0.981459	2.39604e+17	0.247244	0.903586	0.889992	0.825692		8311.93	168609	1.05226	2488.55	1189.96	20.3252	60.307	547.442	2.26067e-16	113.114	214.173	256.404	7.53019	71.6228	1207.45	2.99106	622.149	8311.93	1189.96	547.442	214.173
2104-64-5	EPN	Insecticide, Acaricide	Organophosphate	1.95	0.35546	60256	4.78	0.044844	1.80909e-05	0.999295								5.30533	7.912	4.43423	2863.9	3.65659	148820	95.3455	4.30603	18.4207	3.86865		1371.12	2.24812	0.105325	2488.55	258.407	0.00581957	60.307	146.938	0.000363974	113.114	0.555379	256.404	1.58015	71.6228	58.3378	0.638388	622.149	1371.12	258.407	146.938	0.555379
2104-96-3	BROMOPHOS	Insecticide	Other pesticide class	11.8	0.0587413	162181	5.21	20.705	0.00835277	0.998166								5.309	7.92173	4.4371	7706.9	3.65881	867.35	95.4244	4.30885	18.4352	3.86922		1370.17	0.371512	0.105196	2488.55	258.239	0.00216256	60.307	146.849	0.0624507	113.114	0.55492	256.404	1.57911	71.6228	58.2918	0.638294	622.149	1370.17	258.239	146.849	0.55492
21087-64-9	METRIBUZIN	Herbicide	Other pesticide class	0.131	5.2912	50.1187	1.7	1.1817e-05	4.76719e-09	0.999904								2.58969	2.76411	2.30636	3.20141	2.01677	669442	37.0516	2.22038	7.67462	3.06555		2808.91	33.4644	0.301483	2488.55	496.814	5.20604	60.307	266.412	8.09132e-05	113.114	1.42917	256.404	3.06442	71.6228	140.023	0.805629	622.149	2808.91	496.814	266.412	1.42917
21564-17-0	2-(THIOCYANATEMETHYLTHIO)BENZOTHIAZOLE	Fungicide, Microbiocide, Wood preservative	Other pesticide class	0.0865	8.01326	1995.26	3.3	7.93196e-05	3.19989e-08	0.99994								5.14109	7.48719	4.30554	95.6255	3.55742	2.81482e+06	91.82	4.17989	17.7708	3.84235		1414.92	50.6802	0.111301	2488.55	266.13	0.174291	60.307	151.034	1.92434e-05	113.114	0.576703	256.404	1.62783	71.6228	60.4713	0.642756	622.149	1414.92	266.13	151.034	0.576703
21609-90-5	LEPTOPHOS	Insecticide	Organophosphate	14.1	0.0491594	2.04174e+06	6.31	0.26765	0.000107975	0.977804								5.311	7.92704	4.43867	97014.7	3.66002	844598	95.4674	4.31039	18.4431	3.86953		1369.65	0.310911	0.105125	2488.55	258.148	0.000171795	60.307	146.8	6.41331e-05	113.114	0.55467	256.404	1.57855	71.6228	58.2667	0.638243	622.149	1369.65	258.148	146.8	0.55467
2163-80-6	MSMA	Herbicide	Other pesticide class	0.00849	81.6428	0.000794328	-3.1	2.79224e-09	1.12644e-12	0.214431								0.875199	0.79199	0.962952	0.820038	0.981485	8.45882e+08	0.24817	0.903619	0.890163	0.825822		8311.52	516.353	1.0522	2488.55	1189.92	20.3243	60.307	547.427	6.40357e-08	113.114	213.374	256.404	7.52991	71.6228	1207.22	2.99059	622.149	8311.52	1189.92	547.427	213.374
2164-17-2	FLUOMETURON	Herbicide	Other pesticide class	0.133	5.21163	263.027	2.42	0.00026361	1.06345e-07	0.999949								4.28105	5.55255	3.63164	13.3178	3.03809	119431	73.3584	3.51937	14.3675	3.67469		1699.17	32.9612	0.150081	2488.55	315.514	1.25146	60.307	176.852	0.000453539	113.114	0.721838	256.404	1.93335	71.6228	74.7952	0.672083	622.149	1699.17	315.514	176.852	0.721838
21725-46-2	CYANAZINE	Herbicide	Other pesticide class	0.0853	8.12599	165.959	2.22	2.5957e-07	1.04715e-10	0.999944								3.87377	4.77681	3.31252	8.70558	2.79216	7.98867e+07	64.6157	3.20657	12.7559	3.57186		1877.82	51.3932	0.174454	2488.55	345.91	1.91448	60.307	192.429	6.78043e-07	113.114	0.819505	256.404	2.12194	71.6228	84.2453	0.691431	622.149	1877.82	345.91	192.429	0.819505
21757-82-4	ACETIC ACID, 1-(3,4-DICHLOROPHENYL)-2,2,2-TRICHL	Insecticide	Other pesticide class	1.11	0.624457	83176.4	4.92	0.0477282	1.92544e-05	0.999041								5.30694	7.91626	4.43549	3952.97	3.65756	192996	95.3801	4.30726	18.427	3.8689		1370.7	3.94941	0.105269	2488.55	258.333	0.00421624	60.307	146.899	0.000280662	113.114	0.555178	256.404	1.5797	71.6228	58.3176	0.638347	622.149	1370.7	258.333	146.899	0.555178
2212-67-1	MOLINATE	Herbicide	Other pesticide class	0.109	6.35915	1621.81	3.21	0.4141	0.000167055	0.999943								5.10375	7.39339	4.27628	77.8808	3.53487	439.322	91.0186	4.15122	17.623	3.83616		1425.27	40.2187	0.112713	2488.55	267.951	0.214002	60.307	151.997	0.123296	113.114	0.581781	256.404	1.63908	71.6228	60.9782	0.643794	622.149	1425.27	267.951	151.997	0.581781
22212-55-1	BENZOYLPROP ETHYL	Herbicide	Other pesticide class	0.17	4.07734	18620.9	4.27	2.51492e-05	1.01456e-08	0.999756								5.2923	7.87757	4.42402	885.597	3.64873	8.20704e+07	95.066	4.29603	18.3691	3.86662		1374.49	25.7873	0.105786	2488.55	259.003	0.0188197	60.307	147.255	6.60003e-07	113.114	0.557012	256.404	1.58383	71.6228	58.5014	0.638723	622.149	1374.49	259.003	147.255	0.557012
22224-92-6	FENAMIPHOS	Nematicide	Organophosphate	0.898	0.771879	1698.24	3.23	0.00012221	4.93017e-08	0.999943								5.11267	7.41571	4.28327	81.5126	3.54026	1.55786e+06	91.21	4.15807	17.6583	3.83765		1422.78	4.88178	0.112374	2488.55	267.514	0.204467	60.307	151.766	3.477e-05	113.114	0.58056	256.404	1.63638	71.6228	60.8564	0.643545	622.149	1422.78	267.514	151.766	0.58056
22248-79-9	TETRACHLORVINPHOS	Insecticide, Acaricide, Veterinary treatment	Organophosphate	1.57	0.441495	3388.44	3.53	0.00018584	7.49712e-08	0.999925								5.20942	7.66148	4.35907	161.823	3.59868	2.03142e+06	93.2867	4.23237	18.0411	3.85348		1396.36	2.79225	0.108769	2488.55	262.862	0.102993	60.307	149.303	2.66645e-05	113.114	0.567636	256.404	1.60765	71.6228	59.565	0.640901	622.149	1396.36	262.862	149.303	0.567636
2227-13-6	TETRASUL	Acaricide, Insecticide, Nematicide	Other pesticide class	99.3	0.00698033	7.4131e+06	6.87	3.2549	0.00131309	0.923939								5.31113	7.92738	4.43877	352237	3.66009	252160	95.4701	4.31048	18.4436	3.86955		1369.62	0.0441474	0.105121	2488.55	258.142	4.73167e-05	60.307	146.797	0.000214811	113.114	0.554654	256.404	1.57852	71.6228	58.2652	0.638239	622.149	1369.62	258.142	146.797	0.554654
2227-17-0	DIENOCHLOR	Acaricide, Insecticide	Organochlorine	685	0.00101189	2.45471e+08	8.39	5.5146	0.00222469	0.268473								5.31117	7.9275	4.43881	1.16636e+07	3.66012	4.92832e+06	95.4711	4.31052	18.4438	3.86955		1369.61	0.00639977	0.105119	2488.55	258.14	1.42894e-06	60.307	146.796	1.09909e-05	113.114	0.554649	256.404	1.5785	71.6228	58.2646	0.638238	622.149	1369.61	258.14	146.796	0.554649
2274-67-1	PHOSPHORIC ACID,2-CHLORO-(2,4-DICHLOROPHENYL)VIN	Insecticide	Organophosphate	1.12	0.618881	1348.96	3.13	0.0033027	1.33237e-06	0.999946								5.06414	7.29494	4.24524	64.9164	3.51095	45936.5	90.1681	4.12079	17.4663	3.82949		1436.42	3.91414	0.114234	2488.55	269.91	0.25674	60.307	153.033	0.00117916	113.114	0.587268	256.404	1.65118	71.6228	61.5256	0.644915	622.149	1436.42	269.91	153.033	0.587268
2275-14-1	PHENKAPTON	Insecticide, Acaricide	Organophosphate	18	0.0385082	691831	5.84	0.872891	0.00035214	0.992343								5.31067	7.92615	4.43841	32873.4	3.65981	87753.9	95.4601	4.31013	18.4418	3.86948		1369.74	0.243547	0.105137	2488.55	258.163	0.000506996	60.307	146.808	0.000617257	113.114	0.554712	256.404	1.57865	71.6228	58.2709	0.638251	622.149	1369.74	258.163	146.808	0.554712
2275-23-2	VAMIDOTHION	Insecticide, Acaricide	Organophosphate	0.00242	286.424	1.44544	0.16	5.24856e-08	2.11736e-11	0.997954								0.954316	0.869692	1.02495	0.888681	1.02926	4.80485e+07	1.94651	0.964382	1.20324	1.05206		7622.45	1811.5	0.958193	2488.55	1117.95	18.7544	60.307	522.017	1.12733e-06	113.114	27.204	256.404	7.05547	71.6228	893.106	2.34748	622.149	7622.45	1117.95	522.017	27.204
22781-23-3	BENDIOCARB	Insecticide, Veterinary treatment	Carbamate	0.0636	10.8985	50.1187	1.7	0.003939	1.58906e-06	0.999904								2.58969	2.76411	2.30636	3.20141	2.01677	2008.33	37.0516	2.22038	7.67462	3.06555		2808.91	68.9283	0.301483	2488.55	496.814	5.20604	60.307	266.412	0.0269711	113.114	1.42917	256.404	3.06442	71.6228	140.023	0.805629	622.149	2808.91	496.814	266.412	1.42917
22936-75-0	DIMETHAMRTRYNE	Herbicide	Other pesticide class	0.192	3.61014	7943.28	3.9	0.00095041	3.83412e-07	0.999875								5.26719	7.81154	4.40434	378.248	3.63356	927826	94.5269	4.27674	18.2698	3.86268		1381.05	22.8325	0.10668	2488.55	260.16	0.0440628	60.307	147.869	5.83802e-05	113.114	0.560189	256.404	1.59097	71.6228	58.8197	0.639375	622.149	1381.05	260.16	147.869	0.560189
23031-36-9	PRALLETHRIN	Insecticide	Pyrethroid	0.207	3.34854	30903	4.49	0.134179	5.41301e-05	0.99962								5.29979	7.89733	4.42988	1469.18	3.65324	25517	95.2266	4.30177	18.3987	3.86778		1372.55	21.178	0.105521	2488.55	258.66	0.0113442	60.307	147.072	0.00212277	113.114	0.556073	256.404	1.58171	71.6228	58.4073	0.63853	622.149	1372.55	258.66	147.072	0.556073
2303-16-4	diallate	Herbicide	Other pesticide class	0.654	1.05986	30903	4.49	0.3838	0.000154832	0.99962								5.29979	7.89733	4.42988	1469.18	3.65324	8920.87	95.2266	4.30177	18.3987	3.86778		1372.55	6.70312	0.105521	2488.55	258.66	0.0113442	60.307	147.072	0.0060719	113.114	0.556073	256.404	1.58171	71.6228	58.4073	0.63853	622.149	1372.55	258.66	147.072	0.556073
2303-17-5	triallate	Herbicide	Other pesticide class	1.06	0.653912	39810.7	4.6	1.212	0.000488942	0.999521								5.30233	7.90406	4.43188	1892.44	3.65478	3638.67	95.2812	4.30373	18.4088	3.86818		1371.89	4.1357	0.105431	2488.55	258.544	0.00880698	60.307	147.011	0.0148864	113.114	0.555754	256.404	1.58099	71.6228	58.3754	0.638465	622.149	1371.89	258.544	147.011	0.555754
2307-68-8	PENTANOCHLOR	Herbicide	Other pesticide class	0.582	1.19097	20417.4	4.31	0.0322299	1.30021e-05	0.999736								5.29396	7.88194	4.42532	970.959	3.64973	70211.3	95.1015	4.2973	18.3757	3.86687		1374.06	7.53237	0.105727	2488.55	258.927	0.0171652	60.307	147.214	0.000771481	113.114	0.556804	256.404	1.58336	71.6228	58.4806	0.63868	622.149	1374.06	258.927	147.214	0.556804
2310-17-0	PHOSALONE	Insecticide, Acaricide	Organophosphate	1.25	0.554518	23988.3	4.38	0.00186513	7.52426e-07	0.999697								5.29651	7.88868	4.42732	1140.63	3.65127	1.42525e+06	95.1563	4.29926	18.3858	3.86727		1373.4	3.50707	0.105637	2488.55	258.81	0.0146118	60.307	147.152	3.80051e-05	113.114	0.556483	256.404	1.58264	71.6228	58.4484	0.638615	622.149	1373.4	258.81	147.152	0.556483
23103-98-2	PIRIMICARB	Insecticide	Carbamate	0.00949	73.0397	50.1187	1.7	8.5345e-05	3.44297e-08	0.999904								2.58969	2.76411	2.30636	3.20141	2.01677	92691.9	37.0516	2.22038	7.67462	3.06555		2808.91	461.943	0.301483	2488.55	496.814	5.20604	60.307	266.412	0.000584373	113.114	1.42917	256.404	3.06442	71.6228	140.023	0.805629	622.149	2808.91	496.814	266.412	1.42917
2312-35-8	PROPARGITE	Acaricide	Other pesticide class	3.47	0.199754	100000	5	0.06464	2.60769e-05	0.998854								5.30765	7.91815	4.43605	4752.35	3.65799	171318	95.3954	4.30781	18.4299	3.86901		1370.52	1.26335	0.105243	2488.55	258.301	0.00350703	60.307	146.882	0.000316175	113.114	0.555089	256.404	1.57949	71.6228	58.3087	0.638328	622.149	1370.52	258.301	146.882	0.555089
23135-22-0	OXAMYL	Insecticide, Acaricide, Nematicide	Carbamate	0.0138	50.2281	0.338844	-0.47	2.3937e-05	9.65661e-09	0.991449								0.893969	0.810325	0.977659	0.8361	0.99282	100235	0.651089	0.918034	0.964438	0.881959		8137.01	317.67	1.02839	2488.55	1172.02	19.9338	60.307	541.178	0.000540395	113.114	81.3297	256.404	7.41167	71.6228	1114.25	2.80024	622.149	8137.01	1172.02	541.178	81.3297
23184-66-9	BUTACHLOR	Herbicide	Other pesticide class	0.541	1.28123	31622.8	4.5	0.005151	2.07801e-06	0.999612								5.30004	7.89802	4.43009	1503.39	3.6534	680165	95.2321	4.30197	18.3998	3.86782		1372.48	8.10322	0.105512	2488.55	258.648	0.0110861	60.307	147.066	7.96376e-05	113.114	0.55604	256.404	1.58164	71.6228	58.4041	0.638524	622.149	1372.48	258.648	147.066	0.55604
23560-59-0	Heptenophos	Insecticide	Organophosphate	0.56	1.23776	208.93	2.32	0.017069	6.88594e-06	0.999947								4.08788	5.17484	3.48028	10.7474	2.92144	1493.57	69.2118	3.37101	13.6031	3.62824		1779.46	7.82829	0.161036	2488.55	329.236	1.55077	60.307	183.913	0.0362665	113.114	0.765085	256.404	2.01844	71.6228	78.9982	0.680688	622.149	1779.46	329.236	183.913	0.765085
23564-05-8	THIOPHANATE-METHYL	Fungicide	Imidazole	0.000251	2761.54	25.1189	1.4	0.00012221	4.93017e-08	0.999847								1.9397	1.93843	1.79705	2.01353	1.62428	42082.4	23.0987	1.72117	5.1025	2.59929		3750.19	17465.5	0.429901	2488.55	637.619	8.27733	60.307	330.788	0.00128716	113.114	2.29246	256.404	3.95322	71.6228	210.607	0.950141	622.149	3750.19	637.619	330.788	2.29246
2385-85-5	Mirex	Insecticide	Organochlorine	109	0.00635915	7.76247e+06	6.89	81.911	0.0330444	0.92064								5.31113	7.92738	4.43877	368837	3.6601	10492.3	95.4701	4.31048	18.4436	3.86955		1369.62	0.0402187	0.105121	2488.55	258.142	4.51871e-05	60.307	146.797	0.00516251	113.114	0.554654	256.404	1.57852	71.6228	58.2651	0.638239	622.149	1369.62	258.142	146.797	0.554654
23947-60-6	Ethyrimol	Fungicide, Metabolite	Other pesticide class	0.0238	29.1238	165.959	2.22	0.00037067	1.49535e-07	0.999944								3.87377	4.77681	3.31252	8.70558	2.79216	55942.5	64.6157	3.20657	12.7559	3.57186		1877.82	184.195	0.174454	2488.55	345.91	1.91448	60.307	192.429	0.000968257	113.114	0.819505	256.404	2.12194	71.6228	84.2453	0.691431	622.149	1877.82	345.91	192.429	0.819505
23950-58-5	PRONAMIDE	Herbicide	Other pesticide class	0.384	1.80507	2691.53	3.43	0.00098677	3.98081e-07	0.999932								5.18383	7.5958	4.33902	128.709	3.58322	304386	92.7374	4.21271	17.9399	3.84934		1403.26	11.4162	0.10971	2488.55	264.076	0.129491	60.307	149.946	0.000177954	113.114	0.570998	256.404	1.61515	71.6228	59.9012	0.641589	622.149	1403.26	264.076	149.946	0.570998
24017-47-8	TRIAZOPHOS	Insecticide, Acaricide, Nematicide	Organophosphate	2.05	0.338121	2187.76	3.34	0.0048884	1.97207e-06	0.999937								5.15553	7.52374	4.31685	104.772	3.56614	50033.4	92.13	4.19098	17.8279	3.84473		1410.96	2.13846	0.11076	2488.55	265.433	0.159075	60.307	150.665	0.00108261	113.114	0.574763	256.404	1.62353	71.6228	60.2775	0.642359	622.149	1410.96	265.433	150.665	0.574763
24151-93-7	PIPEROPHOS	Herbicide	Organophosphate	0.451	1.53691	10964.8	4.04	0.00045046	1.81724e-07	0.999841								5.27922	7.84312	4.41377	521.815	3.64083	2.70023e+06	94.7852	4.28598	18.3174	3.86457		1377.9	9.72027	0.10625	2488.55	259.604	0.0319398	60.307	147.574	2.006e-05	113.114	0.558662	256.404	1.58754	71.6228	58.6668	0.639062	622.149	1377.9	259.604	147.574	0.558662
24307-26-4	Mepiquat chloride	Plant growth regulator	Other pesticide class	0.0153	45.3037	0.00151356	-2.82	1.48074e-08	5.97355e-12	0.342155								0.875239	0.792029	0.962983	0.820072	0.98151	1.59514e+08	0.24903	0.903649	0.890322	0.825944		8311.14	286.525	1.05215	2488.55	1189.88	20.3234	60.307	547.414	3.39572e-07	113.114	212.636	256.404	7.52965	71.6228	1207	2.99015	622.149	8311.14	1189.88	547.414	212.636
24353-61-5	BENZOIC ACID, 2-[(AMINOMETHOXYPHOSPHINOTHIOYL)OX	Acarcicide, Insecticide	Organophosphate	0.0938	7.38963	501.187	2.7	0.0158538	6.39569e-06	0.999952								4.7035	6.44695	3.96266	24.6341	3.29318	3649.07	82.4268	3.84382	16.0392	3.76408		1546.56	46.736	0.12926	2488.55	289.158	0.67657	60.307	163.153	0.014844	113.114	0.642424	256.404	1.77016	71.6228	66.9997	0.656122	622.149	1546.56	289.158	163.153	0.642424
24579-73-5	Propamocarb	Fungicide	Carbamate	0.00418	165.825	13.1826	1.12	0.00014948	6.03029e-08	0.999742								1.50574	1.44336	1.45702	1.44637	1.36224	25564.3	13.7835	1.38789	3.3853	2.1129		4830.99	1048.77	0.577355	2488.55	786.421	11.5231	60.307	394.419	0.00211884	113.114	3.84177	256.404	4.90254	71.6228	317.438	1.16887	622.149	4830.99	786.421	394.419	3.84177
24602-86-6	Tridemorph	Fungicide	Morpholine	1.36	0.509667	2.39883e+06	6.38	9.74307	0.00393053	0.974029								5.31103	7.92711	4.43869	113982	3.66003	27259.7	95.4679	4.31041	18.4432	3.86953		1369.65	3.22341	0.105124	2488.55	258.147	0.000146222	60.307	146.8	0.00198706	113.114	0.554667	256.404	1.57854	71.6228	58.2664	0.638242	622.149	1369.65	258.147	146.8	0.554667
2464-37-1	9H-FLUORENE-9-CARBOXYLIC AICD, 2-CHLORO-9-HYDROX	Herbicide, Plant growth regulator	Other pesticide class	0.706	0.981795	758.578	2.88	2.6626e-06	1.07414e-09	0.999951								4.89012	6.87523	4.10889	36.8641	3.40587	3.24303e+07	86.4327	3.98714	16.7777	3.79904		1487.54	6.2094	0.121208	2488.55	278.867	0.452111	60.307	157.755	1.67025e-06	113.114	0.612649	256.404	1.70653	71.6228	64.0507	0.650085	622.149	1487.54	278.867	157.755	0.612649
24691-80-3	Fenfuram	Fungicide	Other pesticide class	0.0529	13.103	416.869	2.62	4.0097e-05	1.61758e-08	0.999951								4.60029	6.21918	3.88179	20.6277	3.23086	1.20997e+06	80.2112	3.76455	15.6308	3.74363		1581.25	82.8703	0.133994	2488.55	295.182	0.807976	60.307	166.3	4.47669e-05	113.114	0.660169	256.404	1.80743	71.6228	68.7504	0.659707	622.149	1581.25	295.182	166.3	0.660169
24934-91-6	CHLORMEPHOS	Insecticide	Organophosphate	0.827	0.838147	1096.48	3.04	29.593	0.0119383	0.999948								5.0111	7.16485	4.20368	52.9195	3.47892	4.18207	89.0296	4.08006	17.2564	3.82042		1451.62	5.30089	0.116309	2488.55	272.579	0.314944	60.307	154.442	12.9521	113.114	0.594778	256.404	1.66767	71.6228	62.2738	0.646447	622.149	1451.62	272.579	154.442	0.594778
25057-89-0	BENTAZONE	Herbicide	Other pesticide class	1	0.693147	218.776	2.34	0.00022018	8.88246e-08	0.999947								4.12826	5.25228	3.51192	11.2152	2.94582	120737	70.0785	3.40202	13.7629	3.63827		1762.06	4.38384	0.158661	2488.55	326.27	1.48608	60.307	182.391	0.000448632	113.114	0.755623	256.404	2.00004	71.6228	78.0812	0.67881	622.149	1762.06	326.27	182.391	0.755623
25311-71-1	ISOFENPHOS	Insecticide	Organophosphate	0.387	1.79108	13182.6	4.12	0.0062317	2.51398e-06	0.999817								5.28457	7.85718	4.41796	627.194	3.64405	234589	94.8999	4.29008	18.3385	3.86541		1376.5	11.3278	0.10606	2488.55	259.358	0.0265734	60.307	147.443	0.0002309	113.114	0.557987	256.404	1.58602	71.6228	58.5991	0.638923	622.149	1376.5	259.358	147.443	0.557987
25319-90-8	MCPA-thioethyl	Herbicide	Other pesticide class	1.39	0.498667	11220.2	4.05	2.2321	0.000900469	0.999838								5.27995	7.84502	4.41434	533.951	3.64126	557.601	94.8007	4.28653	18.3202	3.86468		1377.71	3.15384	0.106225	2488.55	259.571	0.0312139	60.307	147.556	0.0971423	113.114	0.558571	256.404	1.58734	71.6228	58.6576	0.639043	622.149	1377.71	259.571	147.556	0.558571
25366-23-8	THIAZAFLURON	Herbicide	Other pesticide class	0.0195	35.546	70.7946	1.85	7.6254e-05	3.07622e-08	0.999921								2.96395	3.29258	2.59962	4.18383	2.24277	133763	45.0855	2.50782	9.1556	3.25279		2454.23	224.812	0.253094	2488.55	440.77	3.98359	60.307	239.566	0.000404945	113.114	1.1745	256.404	2.71318	71.6228	117.373	0.759256	622.149	2454.23	440.77	239.566	1.1745
2540-82-1	FORMOTHION	Insecticide, Acaricide	Other pesticide class	0.164	4.22651	30.1995	1.48	1.111e-05	4.48197e-09	0.999866								2.09577	2.12694	1.91934	2.25494	1.71852	513538	26.449	1.84104	5.72009	2.73322		3470.91	26.7307	0.3918	2488.55	596.993	7.39118	60.307	312.648	0.000105477	113.114	2.00208	256.404	3.69584	71.6228	187.868	0.903586	622.149	3470.91	596.993	312.648	2.00208
25606-41-1	PROPAMOCARB HCL	Fungicide	Carbamate	0.00701	98.8798	0.40738	-0.39	8.6596e-09	3.49344e-12	0.992871								0.897755	0.814031	0.980626	0.839357	0.995106	2.77949e+08	0.732362	0.920942	0.97942	0.893089		8102.69	625.369	1.02371	2488.55	1168.47	19.8565	60.307	539.934	1.9488e-07	113.114	72.3043	256.404	7.38827	71.6228	1097.2	2.76534	622.149	8102.69	1168.47	539.934	72.3043
2581-34-2	3-METHYL-4-NITROPHENOL	Metabolite	Other pesticide class	0.0631	10.9849	301.995	2.48	0.0016261	6.55998e-07	0.99995								4.38626	5.76618	3.71408	15.1694	3.10162	22014.4	75.6168	3.60017	14.7838	3.69842		1658.41	69.4745	0.144521	2488.55	308.51	1.0987	60.307	173.229	0.00246051	113.114	0.700279	256.404	1.88996	71.6228	72.689	0.66777	622.149	1658.41	308.51	173.229	0.700279
2593-15-9	ETRIDAZOLE	Fungicide	Other pesticide class	0.704	0.984584	2344.23	3.37	0.028078	1.13272e-05	0.999936								5.16558	7.54926	4.32472	112.207	3.5722	9327.83	92.3457	4.1987	17.8677	3.84637		1408.21	6.22705	0.110386	2488.55	264.949	0.148535	60.307	150.409	0.005807	113.114	0.573421	256.404	1.62054	71.6228	60.1433	0.642085	622.149	1408.21	264.949	150.409	0.573421
2595-54-2	MECARBAM	Insecticide, Acaricide	Organophosphate	0.54	1.28361	194.984	2.29	0.000141849	5.72243e-08	0.999946								4.02574	5.05716	3.43159	10.0848	2.88392	168841	67.8779	3.32329	13.3572	3.61244		1806.93	8.11822	0.164783	2488.55	333.907	1.65266	60.307	186.306	0.000320815	113.114	0.78012	256.404	2.04742	71.6228	80.4525	0.683665	622.149	1806.93	333.907	186.306	0.78012
26002-80-2	PHENOTHRIN	Insecticide	Pyrethroid	0.977	0.709465	3.46737e+07	7.54	0.6868	0.000277067	0.722066								5.31117	7.92748	4.4388	1.64753e+06	3.66012	5.58962e+06	95.4709	4.31051	18.4438	3.86955		1369.61	4.48704	0.10512	2488.55	258.14	1.01161e-05	60.307	146.796	9.69057e-06	113.114	0.55465	256.404	1.57851	71.6228	58.2647	0.638238	622.149	1369.61	258.14	146.796	0.55465
26087-47-8	IBP (IPROBENFOS)	Fungicide	Organophosphate	0.0512	13.538	2187.76	3.34	0.0038784	1.56462e-06	0.999937								5.15553	7.52374	4.31685	104.772	3.56614	63062.9	92.13	4.19098	17.8279	3.84473		1410.96	85.6219	0.11076	2488.55	265.433	0.159075	60.307	150.665	0.00085893	113.114	0.574763	256.404	1.62353	71.6228	60.2775	0.642359	622.149	1410.96	265.433	150.665	0.574763
26225-79-6	ETHOFUMESATE	Herbicide	Other pesticide class	1.13	0.613405	501.187	2.7	0.0037269	1.5035e-06	0.999952								4.7035	6.44695	3.96266	24.6341	3.29318	15522.7	82.4268	3.84382	16.0392	3.76408		1546.56	3.8795	0.12926	2488.55	289.158	0.67657	60.307	163.153	0.00348951	113.114	0.642424	256.404	1.77016	71.6228	66.9997	0.656122	622.149	1546.56	289.158	163.153	0.642424
26259-45-0	SECBUMETON	Herbicide	Other pesticide class	0.152	4.56018	4365.16	3.64	0.00035249	1.42201e-07	0.999914								5.23178	7.71927	4.3766	208.232	3.61218	1.37779e+06	93.7667	4.24954	18.1296	3.85706		1390.39	28.8411	0.107955	2488.55	261.809	0.080039	60.307	148.744	3.93142e-05	113.114	0.56473	256.404	1.60115	71.6228	59.2743	0.640305	622.149	1390.39	261.809	148.744	0.56473
2631-37-0	3-I-PR-5-MEPHENYL-N-ME CARBAMATE	Insecticide	Carbamate	0.105	6.6014	1258.93	3.1	0.0089789	3.62225e-06	0.999947								5.04752	7.25397	4.23222	60.6383	3.50092	15786.5	89.8114	4.10803	17.4005	3.82667		1441.15	41.7509	0.11488	2488.55	270.741	0.274854	60.307	153.472	0.00343119	113.114	0.589601	256.404	1.65631	71.6228	61.7581	0.645391	622.149	1441.15	270.741	153.472	0.589601
2631-40-5	ISOPROCARB	Insecticide	Carbamate	0.0975	7.1092	204.174	2.31	0.0013534	5.45986e-07	0.999947								4.06738	5.13581	3.46422	10.5214	2.90906	18447.8	68.7716	3.35526	13.522	3.62307		1788.43	44.9625	0.162259	2488.55	330.763	1.58408	60.307	184.696	0.00293621	113.114	0.769982	256.404	2.02791	71.6228	79.4723	0.681658	622.149	1788.43	330.763	184.696	0.769982
2634-33-5	1,2-Benzisothiazol-3(2H)-one	Microbiocide, Other product constituent, Additive	Other pesticide class	0.255	2.71822	4.36516	0.64	2.41738e-05	9.75212e-09	0.999297								1.1059	1.02168	1.14372	1.02741	1.12079	117694	5.20045	1.0808	1.80308	1.42004		6577.65	17.1915	0.815651	2488.55	1001.85	16.222	60.307	479.385	0.000460232	113.114	10.1824	256.404	6.29548	71.6228	595.992	1.73917	622.149	6577.65	1001.85	479.385	10.1824
2636-26-2	CYANOPHOS	Insecticide	Organophosphate	1.42	0.488132	512.861	2.71	0.55348	0.000223284	0.999952								4.71548	6.47378	3.97204	25.1888	3.30041	106.859	82.6838	3.85301	16.0866	3.7664		1542.63	3.08721	0.128724	2488.55	288.474	0.66167	60.307	162.795	0.506901	113.114	0.640426	256.404	1.76593	71.6228	66.8023	0.655718	622.149	1542.63	288.474	162.795	0.640426
2642-71-9	AZINPHOS ETHYL	Insecticide, Acaricide	Organophosphate	3.3	0.210045	2511.89	3.4	0.0100495	4.05415e-06	0.999934								5.175	7.57326	4.3321	120.173	3.57789	27908.8	92.5479	4.20593	17.9049	3.84791		1405.65	1.32844	0.110036	2488.55	264.498	0.138689	60.307	150.17	0.00194085	113.114	0.572168	256.404	1.61775	71.6228	60.0181	0.641828	622.149	1405.65	264.498	150.17	0.572168
26471-62-5	2,4/2,6-TOLUENEDIISOCYANATE	Other product constituent	Other pesticide class	0.425	1.63093	5495.41	3.74	14.2159	0.00573494	0.999902								5.24788	7.7611	4.38921	261.936	3.6219	42.9657	94.1123	4.2619	18.1933	3.85962		1386.13	10.3149	0.107373	2488.55	261.057	0.0636287	60.307	148.345	1.2607	113.114	0.562657	256.404	1.59651	71.6228	59.0668	0.63988	622.149	1386.13	261.057	148.345	0.562657
26530-20-1	3(2H)-ISOTHIAZOLONE, 2-OCTYL-	Fungicide, Bactericide	Other pesticide class	0.207	3.34854	281.838	2.45	0.0020907	8.43426e-07	0.99995								4.33467	5.66071	3.67366	14.2116	3.07047	16054.9	74.5094	3.56055	14.5797	3.68692		1678.15	21.178	0.147213	2488.55	311.905	1.17275	60.307	174.987	0.00337384	113.114	0.710687	256.404	1.91099	71.6228	73.7067	0.669854	622.149	1678.15	311.905	174.987	0.710687
26644-46-2	TRIFORINE	Fungicide	Other pesticide class	0.000688	1007.48	158.489	2.2	0.00038582	1.55647e-07	0.999943								3.82867	4.69558	3.27717	8.35067	2.76492	51602.3	63.6475	3.17193	12.5774	3.55926		1899.94	6371.86	0.177472	2488.55	349.641	1.99585	60.307	194.324	0.00104969	113.114	0.831971	256.404	2.14512	71.6228	85.4408	0.693878	622.149	1899.94	349.641	194.324	0.831971
2686-99-9	N-ME-3,4,5-TRIMEPHENYL CARBAMATE	Insecticide, Molluscicide, Repellent	Carbamate	0.0722	9.60038	457.088	2.66	222.882	0.0899145	0.999952								4.65357	6.33596	3.92353	22.5387	3.26303	0.237656	81.3548	3.80547	15.8416	3.75429		1563.15	60.718	0.131524	2488.55	292.041	0.739469	60.307	164.66	227.921	113.114	0.650888	256.404	1.788	71.6228	67.8354	0.657833	622.149	1563.15	292.041	164.66	0.650888
2703-37-9	Phosphorodithioic acid, S-[2-(ethylsulfinyl)ethy	Metabolite	Other pesticide class	0.105	6.6014	5.37032	0.73	0.000143194	5.7767e-08	0.999422								1.15568	1.0725	1.18272	1.07517	1.15085	20646.1	6.2689	1.11903	2.00004	1.52544		6294.35	41.7509	0.777001	2488.55	968.81	15.5014	60.307	466.865	0.00262357	113.114	8.44692	256.404	6.08042	71.6228	537.299	1.61901	622.149	6294.35	968.81	466.865	8.44692
27304-13-8	OXYCHLORDANE	Metabolite	Organochlorine	44.1	0.0157176	301995	5.48	8.75341	0.00353128	0.996622								5.31001	7.9244	4.43789	14350.2	3.65942	3820.03	95.446	4.30962	18.4392	3.86937		1369.91	0.0994068	0.10516	2488.55	258.193	0.00116142	60.307	146.824	0.0141797	113.114	0.554794	256.404	1.57883	71.6228	58.2792	0.638268	622.149	1369.91	258.193	146.824	0.554794
27314-13-2	NORFLURAZON	Herbicide	Other pesticide class	4.94	0.140313	199.526	2.3	3.4643e-05	1.39756e-08	0.999946								4.04666	5.09658	3.44799	10.3006	2.89655	705848	68.327	3.33935	13.44	3.6178		1797.59	0.887417	0.163508	2488.55	332.32	1.61804	60.307	185.493	7.67399e-05	113.114	0.774993	256.404	2.03757	71.6228	79.9569	0.682651	622.149	1797.59	332.32	185.493	0.774993
27355-22-2	TETRACHLOROPHTHALIDE	Fungicide	Other pesticide class	0.171	4.05349	1584.89	3.2	0.00032522	1.312e-07	0.999944								5.09915	7.3819	4.27268	76.1267	3.53209	546817	90.9198	4.14768	17.6048	3.83539		1426.56	25.6365	0.112889	2488.55	268.177	0.218933	60.307	152.117	9.90582e-05	113.114	0.582413	256.404	1.64047	71.6228	61.0413	0.643923	622.149	1426.56	268.177	152.117	0.582413
2764-72-9	DIQUAT	Herbicide	Other pesticide class	0.766	0.904892	229.087	2.36	3.535e-06	1.42608e-09	0.999948								4.16777	5.32884	3.54288	11.7051	2.96969	7.84315e+06	70.9268	3.43237	13.9192	3.64792		1745.35	5.72303	0.156382	2488.55	323.418	1.42388	60.307	180.925	6.90624e-06	113.114	0.746586	256.404	1.98235	71.6228	77.204	0.677014	622.149	1745.35	323.418	180.925	0.746586
2797-51-5	2-AMINO-3-CHLORO-1,4-NAPHTHOQUINONE	Herbicide, Algicide, Acaricide	Other pesticide class	1.33	0.521163	131.826	2.12	1.97733e-06	7.97692e-10	0.99994								3.64166	4.36797	3.13064	7.08374	2.652	8.57574e+06	59.6332	3.02831	11.8374	3.50404		1997.5	3.29612	0.190783	2488.55	366.006	2.35281	60.307	202.599	6.31626e-06	113.114	0.887976	256.404	2.24685	71.6228	90.7821	0.704814	622.149	1997.5	366.006	202.599	0.887976
2814-20-2	4(1H)-Pyrimidinone, 6-methyl-2-(1-methylethyl)-	Metabolite	Other pesticide class	0.0215	32.2394	162.181	2.21	0.00584057	2.35619e-06	0.999943								3.85131	4.73624	3.29492	8.52608	2.77859	3478.76	64.1335	3.18932	12.667	3.56562		1888.77	203.9	0.175948	2488.55	347.758	1.95479	60.307	193.368	0.0155707	113.114	0.825667	256.404	2.13342	71.6228	84.8365	0.692641	622.149	1888.77	347.758	193.368	0.825667
28249-77-6	THIOBENCARB	Herbicide	Other pesticide class	0.194	3.57292	2511.89	3.4	0.026967	1.0879e-05	0.999934								5.175	7.57326	4.3321	120.173	3.57789	10400.5	92.5479	4.20593	17.9049	3.84791		1405.65	22.5971	0.110036	2488.55	264.498	0.138689	60.307	150.17	0.0052081	113.114	0.572168	256.404	1.61775	71.6228	60.0181	0.641828	622.149	1405.65	264.498	150.17	0.572168
28434-01-7	BIORESMETHRIN	Insecticide	Pyrethroid	0.323	2.14597	1.38038e+06	6.14	0.013433	5.41911e-06	0.984873								5.31092	7.92682	4.43861	65590.2	3.65997	1.13775e+07	95.4656	4.31032	18.4428	3.86951		1369.67	13.5723	0.105128	2488.55	258.151	0.000254103	60.307	146.802	4.76086e-06	113.114	0.55468	256.404	1.57857	71.6228	58.2678	0.638245	622.149	1369.67	258.151	146.802	0.55468
2905-69-3	METHYL 2,5-DICHLOROBENZOATE	Plant growth regulator, Fungicide	Other pesticide class	0.321	2.15934	1318.26	3.12	4.63006	0.00186785	0.999946								5.05871	7.28154	4.24099	63.4574	3.50767	32.033	90.0516	4.11662	17.4448	3.82857		1437.96	13.6568	0.114445	2488.55	270.181	0.262643	60.307	153.176	1.69096	113.114	0.588028	256.404	1.65285	71.6228	61.6013	0.64507	622.149	1437.96	270.181	153.176	0.588028
29091-05-2	DINITRAMINE	Herbicide	Other pesticide class	0.0723	9.5871	19952.6	4.3	0.14039	5.66358e-05	0.999742								5.29356	7.88088	4.42501	948.875	3.64949	15752.2	95.0929	4.29699	18.3741	3.86681		1374.17	60.634	0.105741	2488.55	258.945	0.0175647	60.307	147.224	0.00343868	113.114	0.556854	256.404	1.58347	71.6228	58.4856	0.638691	622.149	1374.17	258.945	147.224	0.556854
29091-21-2	PRODIAMINE	Herbicide	Other pesticide class	0.0595	11.6495	12589.3	4.1	0.088779	3.5815e-05	0.999823								5.28332	7.8539	4.41698	599.003	3.6433	15726.7	94.8731	4.28913	18.3336	3.86521		1376.83	73.678	0.106104	2488.55	259.415	0.027824	60.307	147.474	0.00344425	113.114	0.558144	256.404	1.58638	71.6228	58.6149	0.638955	622.149	1376.83	259.415	147.474	0.558144
29104-30-1	BENZOXIMATE	Acaricide, Miticide	Other pesticide class	1.27	0.545785	5370.32	3.73	0.0054439	2.19617e-06	0.999903								5.24642	7.75731	4.38807	255.992	3.62102	109654	94.0811	4.26079	18.1876	3.85939		1386.51	3.45184	0.107426	2488.55	261.125	0.0651061	60.307	148.381	0.000493978	113.114	0.562843	256.404	1.59693	71.6228	59.0854	0.639919	622.149	1386.51	261.125	148.381	0.562843
2921-88-2	Chloropyrifos	Insecticide	Organophosphate	2.1	0.33007	91201.1	4.96	0.29593	0.000119383	0.998952								5.30731	7.91725	4.43578	4334.27	3.65779	34129.1	95.3881	4.30755	18.4285	3.86895		1370.61	2.08754	0.105255	2488.55	258.316	0.00384532	60.307	146.89	0.00158711	113.114	0.555131	256.404	1.57959	71.6228	58.3129	0.638337	622.149	1370.61	258.316	146.89	0.555131
29232-93-7	PIRIMIPHOS-METHYL	Insecticide, Acaricide	Organophosphate	0.591	1.17284	15848.9	4.2	0.070801	2.85624e-05	0.999787								5.28902	7.86891	4.42145	753.887	3.64674	24817.5	94.9955	4.2935	18.3562	3.8661		1375.35	7.41766	0.105902	2488.55	259.153	0.0221076	60.307	147.335	0.0021826	113.114	0.557425	256.404	1.58476	71.6228	58.5428	0.638808	622.149	1375.35	259.153	147.335	0.557425
2961-62-8	IOXYNIL-SODIUM	Herbicide	Other pesticide class	0.157	4.41495	5.12861	0.71	1.04399e-14	4.21165e-18	0.999396								1.14381	1.06035	1.17343	1.06369	1.14369	2.80619e+14	6.0143	1.10992	1.95311	1.50093		6359.62	27.9225	0.785906	2488.55	976.483	15.6688	60.307	469.789	1.93025e-13	113.114	8.80451	256.404	6.13032	71.6228	550.211	1.64544	622.149	6359.62	976.483	469.789	8.80451
297-78-9	ISOBENZAN	Insecticide	Organochlorine	28.8	0.0240676	32359.4	4.51	0.441874	0.00017826	0.999604								5.3003	7.89868	4.43028	1538.39	3.65355	8113.35	95.2376	4.30216	18.4008	3.86786		1372.42	0.152217	0.105503	2488.55	258.636	0.0108339	60.307	147.06	0.00667624	113.114	0.556009	256.404	1.58157	71.6228	58.4009	0.638517	622.149	1372.42	258.636	147.06	0.556009
297-97-2	THIONAZIN	Nematicide, Insecticide	Organophosphate	0.858	0.807864	72.4436	1.86	0.08686	3.50409e-05	0.999922								2.98942	3.33011	2.61957	4.26218	2.25814	119.532	45.6321	2.52737	9.25637	3.26403		2433.33	5.10937	0.250242	2488.55	437.413	3.91036	60.307	237.935	0.453157	113.114	1.16043	256.404	2.69219	71.6228	116.095	0.75664	622.149	2433.33	437.413	237.935	1.16043
298-00-0	Parathion-methyl	Insecticide	Organophosphate	0.935	0.741334	724.436	2.86	0.0101	4.07452e-06	0.999951								4.87224	6.83324	4.09488	35.2418	3.39507	8175.14	86.0489	3.97341	16.7069	3.7958		1493	4.6886	0.121953	2488.55	279.821	0.472923	60.307	158.256	0.00662578	113.114	0.615382	256.404	1.71243	71.6228	64.322	0.65064	622.149	1493	279.821	158.256	0.615382
298-02-2	PHORATE	Insecticide, Acaricide, Nematicide	Organophosphate	0.83	0.835117	3630.78	3.56	0.44137	0.000178057	0.999922								5.21606	7.67862	4.36428	173.338	3.60269	916.123	93.4294	4.23747	18.0674	3.85455		1394.58	5.28173	0.108527	2488.55	262.548	0.0961514	60.307	149.136	0.0591259	113.114	0.566769	256.404	1.60571	71.6228	59.4783	0.640723	622.149	1394.58	262.548	149.136	0.566769
298-04-4	Disulfoton	Insecticide, Acaricide	Organophosphate	1.12	0.618881	10471.3	4.02	0.21816	8.80096e-05	0.999847								5.27773	7.83919	4.4126	498.367	3.63993	5325.02	94.7531	4.28483	18.3115	3.86433		1378.29	3.91414	0.106303	2488.55	259.673	0.0334426	60.307	147.611	0.0101721	113.114	0.558851	256.404	1.58797	71.6228	58.6857	0.6391	622.149	1378.29	259.673	147.611	0.558851
29973-13-5	ETHIOFENCARB	Insecticide	Carbamate	0.0356	19.4704	109.648	2.04	0.00011615	4.6857e-08	0.999935								3.44597	4.04022	2.9773	6.02995	2.53383	124853	55.4324	2.87801	11.063	3.44053		2110.94	123.142	0.206259	2488.55	384.856	2.76398	60.307	212.047	0.000433844	113.114	0.95527	256.404	2.36419	71.6228	97.1367	0.717824	622.149	2110.94	384.856	212.047	0.95527
299-84-3	RONNEL	Insecticide	Other pesticide class	11.6	0.0597541	75857.8	4.88	3.232	0.00130385	0.999122								5.30653	7.91518	4.43517	3605.23	3.65732	2599.34	95.3713	4.30695	18.4254	3.86883		1370.81	0.377917	0.105283	2488.55	258.352	0.00462292	60.307	146.909	0.0208386	113.114	0.555229	256.404	1.57981	71.6228	58.3227	0.638357	622.149	1370.81	258.352	146.909	0.555229
299-86-5	CRUFOMATE	Insecticide, Veterinary treatment	Organophosphate	2.77	0.250234	2630.27	3.42	0.007293	2.94213e-06	0.999933								5.18095	7.58844	4.33677	125.798	3.58148	40254.5	92.6756	4.2105	17.9285	3.84888		1404.04	1.58261	0.109816	2488.55	264.214	0.132487	60.307	150.019	0.00134561	113.114	0.571379	256.404	1.616	71.6228	59.9393	0.641667	622.149	1404.04	264.214	150.019	0.571379
30043-49-3	Ethidimuron	Herbicide	Other pesticide class	0.00167	415.058	0.60256	-0.22	1.13011e-07	4.55909e-11	0.995157								0.908502	0.824563	0.989047	0.848631	1.0016	2.14893e+07	0.963051	0.929196	1.02195	0.924335		8006.84	2625.05	1.01064	2488.55	1158.52	19.6395	60.307	536.436	2.52064e-06	113.114	54.9845	256.404	7.32264	71.6228	1051.54	2.67186	622.149	8006.84	1158.52	536.436	54.9845
300-76-5	NALED	Insecticide, Acaricide	Organophosphate	0.0377	18.3859	23.9883	1.38	6.5751	0.00265251	0.999842								1.90288	1.8948	1.76821	1.95981	1.60205	0.76314	22.3085	1.6929	4.95683	2.56508		3822.74	116.282	0.439799	2488.55	648.02	8.50421	60.307	335.378	70.9786	113.114	2.37366	256.404	4.01924	71.6228	216.796	0.962813	622.149	3822.74	648.02	335.378	2.37366
301-12-2	OXYDEMETON METHYL	Insecticide	Organophosphate	0.00644	107.632	0.18197	-0.74	9.35864e-07	3.77544e-10	0.984224								0.885278	0.801828	0.97085	0.828646	0.987572	2.54521e+06	0.464537	0.91136	0.930049	0.856168		8216.89	680.72	1.03929	2488.55	1180.24	20.1131	60.307	544.053	2.12818e-05	113.114	113.991	256.404	7.46595	71.6228	1155.45	2.88459	622.149	8216.89	1180.24	544.053	113.991
30560-19-1	ACEPHATE	Insecticide	Organophosphate	0.00745	93.0399	0.141254	-0.85	5.0601e-08	2.04133e-11	0.979779								0.883017	0.799619	0.969078	0.826712	0.986206	4.69844e+07	0.415998	0.909623	0.921101	0.849401		8237.93	588.435	1.04216	2488.55	1182.4	20.1602	60.307	544.807	1.15286e-06	113.114	127.291	256.404	7.4802	71.6228	1166.67	2.90757	622.149	8237.93	1182.4	544.807	127.291
3060-89-7	METOBROMURON	Herbicide	Other pesticide class	0.063	11.0023	239.883	2.38	0.0003131	1.2631e-07	0.999948								4.20642	5.40444	3.57316	12.2181	2.99302	92369.5	71.7563	3.46205	14.0722	3.6572		1729.32	69.5848	0.154194	2488.55	320.677	1.36409	60.307	179.515	0.000586413	113.114	0.737955	256.404	1.96536	71.6228	76.365	0.675297	622.149	1729.32	320.677	179.515	0.737955
3064-70-8	Methane, sulfonylbis trichloro-	Fungicide, Algicide, Bactericide, Biocide	Other pesticide class	1.88	0.368695	1202.26	3.08	1.536	0.00061965	0.999947								5.03586	7.22535	4.22309	57.946	3.49388	88.1982	89.5612	4.09908	17.3544	3.82468		1444.49	2.33183	0.115335	2488.55	271.326	0.287624	60.307	153.781	0.614147	113.114	0.591248	256.404	1.65993	71.6228	61.9222	0.645727	622.149	1444.49	271.326	153.781	0.591248
309-00-2	Aldrin	Insecticide	Other pesticide class	100	0.00693147	3.16228e+06	6.5	4.444	0.00179279	0.966055								5.31106	7.92721	4.43872	150257	3.66006	78784.6	95.4687	4.31043	18.4434	3.86954		1369.64	0.0438384	0.105123	2488.55	258.145	0.000110921	60.307	146.799	0.000687528	113.114	0.554662	256.404	1.57853	71.6228	58.266	0.638241	622.149	1369.64	258.145	146.799	0.554662
31218-83-4	PROPETAMPHOS	Insecticide, Acaricide, Veterinary treatment	Organophosphate	0.205	3.38121	6606.93	3.82	0.0048581	1.95984e-06	0.999889								5.2584	7.78855	4.39745	314.751	3.62825	151059	94.3382	4.26999	18.235	3.86129		1383.35	21.3846	0.106995	2488.55	260.567	0.052952	60.307	148.085	0.00035858	113.114	0.561309	256.404	1.59349	71.6228	58.9319	0.639604	622.149	1383.35	260.567	148.085	0.561309
314-40-9	BROMACIL	Herbicide	Other pesticide class	0.0107	64.7801	128.825	2.11	1.3029e-05	5.25613e-09	0.999939								3.61762	4.3269	3.11181	6.94116	2.63748	1.27599e+06	59.1172	3.00984	11.7422	3.49657		2010.78	409.705	0.192594	2488.55	368.221	2.40114	60.307	203.714	4.24507e-05	113.114	0.895728	256.404	2.26064	71.6228	91.5176	0.70632	622.149	2010.78	368.221	203.714	0.895728
315-18-4	MEXACARBATE	Insecticide, Molluscicide	Carbamate	0.0139	49.8667	363.078	2.56	0.0803208	3.24028e-05	0.999951								4.5139	6.03327	3.81409	18.0718	3.17869	529.882	78.3567	3.6982	15.2889	3.72585		1611.52	315.384	0.138123	2488.55	300.421	0.922249	60.307	169.029	0.102224	113.114	0.675793	256.404	1.83986	71.6228	70.2876	0.662854	622.149	1611.52	300.421	169.029	0.675793
319-84-6	alpha-HCH	Insecticide, Other product constituent	Organochlorine	17	0.0407734	6309.57	3.8	0.51914	0.00020943	0.999893								5.25594	7.78213	4.39553	300.621	3.62677	1350.19	94.2854	4.2681	18.2253	3.8609		1384	0.257873	0.107083	2488.55	260.682	0.0554407	60.307	148.146	0.0401179	113.114	0.561623	256.404	1.59419	71.6228	58.9633	0.639669	622.149	1384	260.682	148.146	0.561623
327-98-0	TRICHLORONATE	Insecticide	Organophosphate	9.82	0.0705853	169824	5.23	1.1312	0.000456346	0.998082								5.3091	7.92199	4.43718	8070.08	3.65887	16623.7	95.4265	4.30892	18.4356	3.86923		1370.14	0.44642	0.105192	2488.55	258.234	0.00206524	60.307	146.846	0.0032584	113.114	0.554908	256.404	1.57909	71.6228	58.2905	0.638291	622.149	1370.14	258.234	146.846	0.554908
32809-16-8	PROCYMIDONE	Fungicide	Other pesticide class	2.79	0.24844	1202.26	3.08	1.1716	0.000472644	0.999947								5.03586	7.22535	4.22309	57.946	3.49388	115.63	89.5612	4.09908	17.3544	3.82468		1444.49	1.57127	0.115335	2488.55	271.326	0.287624	60.307	153.781	0.468447	113.114	0.591248	256.404	1.65993	71.6228	61.9222	0.645727	622.149	1444.49	271.326	153.781	0.591248
330-54-1	diuron	Herbicide	Other pesticide class	0.113	6.13405	478.63	2.68	5.0904e-05	2.05356e-08	0.999952								4.67895	6.39218	3.94342	23.5623	3.27836	1.08742e+06	81.8996	3.82496	15.942	3.75929		1554.67	38.795	0.130368	2488.55	290.568	0.707346	60.307	163.891	4.9812e-05	113.114	0.646558	256.404	1.77889	71.6228	67.4081	0.656958	622.149	1554.67	290.568	163.891	0.646558
330-55-2	linuron	Herbicide	Other pesticide class	0.148	4.68343	1584.89	3.2	0.00063125	2.54658e-07	0.999944								5.09915	7.3819	4.27268	76.1267	3.53209	281720	90.9198	4.14768	17.6048	3.83539		1426.56	29.6205	0.112889	2488.55	268.177	0.218933	60.307	152.117	0.000192271	113.114	0.582413	256.404	1.64047	71.6228	61.0413	0.643923	622.149	1426.56	268.177	152.117	0.582413
33089-61-1	AMITRAZ	Insecticide, Acaricide, Veterinary treatment	Other pesticide class	2.34	0.296217	316228	5.5	0.99687	0.000402155	0.996466								5.31006	7.92454	4.43793	15026.5	3.65945	35124	95.4471	4.30966	18.4394	3.86938		1369.9	1.87344	0.105159	2488.55	258.191	0.00110915	60.307	146.823	0.00154216	113.114	0.554788	256.404	1.57882	71.6228	58.2785	0.638267	622.149	1369.9	258.191	146.823	0.554788
33245-39-5	FLUCHLORALIN	Herbicide	Other pesticide class	0.393	1.76373	42658	4.63	1.515	0.000611178	0.99949								5.30292	7.90562	4.43234	2027.73	3.65514	3119.01	95.2938	4.30418	18.4111	3.86827		1371.74	11.1548	0.10541	2488.55	258.517	0.00821939	60.307	146.996	0.0173666	113.114	0.55568	256.404	1.58083	71.6228	58.368	0.63845	622.149	1371.74	258.517	146.996	0.55568
333-41-5	Diazinon	Insecticide, Acaricide, Repellent, Veterinary treatment	Organophosphate	1.42	0.488132	6456.54	3.81	0.011413	4.60421e-06	0.999891								5.25718	7.78537	4.3965	307.605	3.62752	62841.3	94.3121	4.26905	18.2302	3.8611		1383.67	3.08721	0.107038	2488.55	260.624	0.0541821	60.307	148.115	0.000861959	113.114	0.561465	256.404	1.59384	71.6228	58.9474	0.639636	622.149	1383.67	260.624	148.115	0.561465
3337-71-1	ASULAM	Herbicide	Carbamate	0.0242	28.6424	0.537032	-0.27	8.53423e-06	3.44286e-09	0.994574								0.9049	0.821031	0.986224	0.845517	0.99942	283714	0.885727	0.926429	1.00769	0.913918		8038.72	181.15	1.01498	2488.55	1161.84	19.7118	60.307	537.604	0.00019092	113.114	59.7847	256.404	7.34451	71.6228	1066.42	2.70232	622.149	8038.72	1161.84	537.604	59.7847
3347-22-6	DITHIANONE	Fungicide	Other pesticide class	0.457	1.51673	691.831	2.84	5.7065e-06	2.3021e-09	0.999951								4.85369	6.78989	4.08034	33.6926	3.38387	1.38367e+07	85.6506	3.95916	16.6335	3.79241		1498.7	9.59265	0.122732	2488.55	280.818	0.494669	60.307	158.78	3.91472e-06	113.114	0.618243	256.404	1.71859	71.6228	64.6059	0.651221	622.149	1498.7	280.818	158.78	0.618243
33629-47-9	BUTRALIN	Herbicide, Plant growth regulator	Other pesticide class	0.567	1.22248	85113.8	4.93	0.49894	0.000201281	0.999019								5.30703	7.91652	4.43556	4045.03	3.65762	18891.8	95.3822	4.30734	18.4274	3.86891		1370.68	7.73164	0.105265	2488.55	258.329	0.00412028	60.307	146.896	0.00286721	113.114	0.555166	256.404	1.57967	71.6228	58.3164	0.638344	622.149	1370.68	258.329	146.896	0.555166
33693-04-8	TERBUMETON	Herbicide	Other pesticide class	0.135	5.13442	1258.93	3.1	0.00046056	1.85798e-07	0.999947								5.04752	7.25397	4.23222	60.6383	3.50092	307768	89.8114	4.10803	17.4005	3.82667		1441.15	32.4729	0.11488	2488.55	270.741	0.274854	60.307	153.472	0.000175998	113.114	0.589601	256.404	1.65631	71.6228	61.7581	0.645391	622.149	1441.15	270.741	153.472	0.589601
33820-53-0	isopropalin	Herbicide	Other pesticide class	0.334	2.07529	630957	5.8	11.211	0.00452272	0.993009								5.31062	7.92602	4.43837	29981	3.65979	6231.36	95.4591	4.31009	18.4416	3.86947		1369.75	13.1253	0.105139	2488.55	258.165	0.000555908	60.307	146.81	0.00869259	113.114	0.554718	256.404	1.57866	71.6228	58.2716	0.638252	622.149	1369.75	258.165	146.81	0.554718
3383-96-8	ABATE	Insecticide, Veterinary treatment	Organophosphate	56.2	0.0123336	912011	5.96	0.0182207	7.35057e-06	0.989942								5.31079	7.92648	4.43851	43335.3	3.65989	5.54188e+06	95.4628	4.31022	18.4423	3.86949		1369.71	0.0780043	0.105133	2488.55	258.157	0.000384598	60.307	146.805	9.77406e-06	113.114	0.554697	256.404	1.57861	71.6228	58.2694	0.638248	622.149	1369.71	258.157	146.805	0.554697
3397-62-4	2-CHLORO-4,6-DIAMINO-S-TRIAZINE	Metabolite	Other pesticide class	0.00948	73.1168	2.0893	0.32	0.00792439	3.19684e-06	0.998572								0.988676	0.903781	1.05187	0.919274	1.05001	327.235	2.68407	0.990771	1.3392	1.14241		7357.55	462.43	0.922053	2488.55	1089.33	18.1303	60.307	511.703	0.165528	113.114	19.7286	256.404	6.86755	71.6228	802.433	2.16184	622.149	7357.55	1089.33	511.703	19.7286
34014-18-1	TEBUTHIURON	Herbicide	Other pesticide class	0.0126	55.0117	61.6595	1.79	1.212e-05	4.88942e-09	0.999915								2.81211	3.07306	2.48064	3.74977	2.15108	758131	41.826	2.3912	8.55474	3.18205		2586.75	347.924	0.271174	2488.55	461.91	4.44472	60.307	249.778	7.14476e-05	113.114	1.26603	256.404	2.84551	71.6228	125.617	0.776135	622.149	2586.75	461.91	249.778	1.26603
34123-59-6	ISOPROTURON	Herbicide	Other pesticide class	0.0784	8.84116	741.31	2.87	1.1312e-05	4.56346e-09	0.999951								4.88126	6.8544	4.10195	36.0436	3.40052	7.46439e+06	86.2426	3.98034	16.7426	3.79744		1490.24	55.9163	0.121576	2488.55	279.339	0.462403	60.307	158.003	7.25668e-06	113.114	0.614	256.404	1.70944	71.6228	64.1848	0.650359	622.149	1490.24	279.339	158.003	0.614
34256-82-1	ACETOCHLOR	Herbicide	Other pesticide class	0.205	3.38121	1071.52	3.03	0.00451633	1.82197e-06	0.999948								5.00459	7.14902	4.19858	51.7336	3.47499	26791	88.89	4.07506	17.2306	3.81929		1453.51	21.3846	0.116566	2488.55	272.91	0.322163	60.307	154.617	0.00202183	113.114	0.595713	256.404	1.66971	71.6228	62.3669	0.646637	622.149	1453.51	272.91	154.617	0.595713
34622-58-7	ORBENCARB	Herbicide	Other pesticide class	0.198	3.50074	2691.53	3.43	0.13231	5.33762e-05	0.999932								5.18383	7.5958	4.33902	128.709	3.58322	2270.12	92.7374	4.21271	17.9399	3.84934		1403.26	22.1406	0.10971	2488.55	264.076	0.129491	60.307	149.946	0.0238607	113.114	0.570998	256.404	1.61515	71.6228	59.9012	0.641589	622.149	1403.26	264.076	149.946	0.570998
34643-46-4	PROTHIOPHOS	Insecticide	Organophosphate	16.1	0.0430526	467735	5.67	36.5547	0.0147468	0.994798								5.31042	7.9255	4.43822	22225.4	3.65967	1416.74	95.4549	4.30994	18.4408	3.86944		1369.8	0.272288	0.105146	2488.55	258.174	0.000749892	60.307	146.814	0.0382333	113.114	0.554743	256.404	1.57871	71.6228	58.274	0.638257	622.149	1369.8	258.174	146.814	0.554743
34681-10-2	Butocarboxim	Insecticide	Carbamate	0.127	5.45785	12.5893	1.1	5.757e-05	2.32248e-08	0.999732								1.48124	1.41661	1.43782	1.41818	1.34744	65236.4	13.2575	1.36907	3.28834	2.07882		4910.91	34.5184	0.588258	2488.55	796.923	11.7521	60.307	398.75	0.000830314	113.114	3.99419	256.404	4.96993	71.6228	326.798	1.18803	622.149	4910.91	796.923	398.75	3.99419
34681-23-7	Butoxycarboxim	Insecticide, Acaricide	Carbamate	0.0271	25.5774	0.154882	-0.81	2.828e-07	1.14087e-10	0.981522								0.883774	0.800359	0.969671	0.827359	0.986664	8.41219e+06	0.432249	0.910205	0.924097	0.85167		8230.87	161.765	1.0412	2488.55	1181.67	20.1444	60.307	544.554	6.43907e-06	113.114	122.505	256.404	7.47542	71.6228	1162.89	2.89983	622.149	8230.87	1181.67	544.554	122.505
3478-94-2	PIPERALIN	Fungicide	Morpholine	0.174	3.9836	20417.4	4.31	0.0427136	1.72314e-05	0.999736								5.29396	7.88194	4.42532	970.959	3.64973	52978.5	95.1015	4.2973	18.3757	3.86687		1374.06	25.1945	0.105727	2488.55	258.927	0.0171652	60.307	147.214	0.00102243	113.114	0.556804	256.404	1.58336	71.6228	58.4806	0.63868	622.149	1374.06	258.927	147.214	0.556804
35367-38-5	DIFLUBENZURON	Insecticide	Benzoylurea	0.349	1.9861	7585.78	3.88	0.0004646	1.87428e-07	0.999879								5.26514	7.80617	4.40274	361.261	3.63232	1.81281e+06	94.4828	4.27516	18.2616	3.86235		1381.58	12.5611	0.106753	2488.55	260.255	0.0461347	60.307	147.92	2.98799e-05	113.114	0.56045	256.404	1.59156	71.6228	58.8458	0.639428	622.149	1381.58	260.255	147.92	0.56045
35400-43-2	SULPROFOS	Insecticide	Organophosphate	9.2	0.0753421	301995	5.48	0.16564	6.68221e-05	0.996622								5.31001	7.9244	4.43789	14350.2	3.65942	201873	95.446	4.30962	18.4392	3.86937		1369.91	0.476504	0.10516	2488.55	258.193	0.00116142	60.307	146.824	0.000268321	113.114	0.554794	256.404	1.57883	71.6228	58.2792	0.638268	622.149	1369.91	258.193	146.824	0.554794
35554-44-0	IMAZALIL BASE	Fungicide, Veterinary treatment	Imidazole	4.57	0.151673	6606.93	3.82	0.00026159	1.0553e-07	0.999889								5.2584	7.78855	4.39745	314.751	3.62825	2.80538e+06	94.3382	4.26999	18.235	3.86129		1383.35	0.959265	0.106995	2488.55	260.567	0.052952	60.307	148.085	1.93081e-05	113.114	0.561309	256.404	1.59349	71.6228	58.9319	0.639604	622.149	1383.35	260.567	148.085	0.561309
35575-96-3	Azamethiphos	Insecticide, Veterinary treatment	Organophosphate	0.00147	471.529	11.2202	1.05	1.4443e-06	5.82656e-10	0.999704								1.42348	1.35403	1.39256	1.35313	1.31256	2.49538e+06	12.0175	1.3247	3.05976	1.99489		5110.19	2982.2	0.615446	2488.55	822.825	12.3171	60.307	409.347	2.17068e-05	113.114	4.40631	256.404	5.13637	71.6228	351.211	1.23801	622.149	5110.19	822.825	409.347	4.40631
35597-43-4	Bilanafos	Herbicide	Other pesticide class	0.000293	2365.69	0.00229087	-2.64	2.47856e-14	9.99894e-18	0.440471								0.875282	0.792071	0.963017	0.820109	0.981536	9.53003e+13	0.249961	0.903683	0.890493	0.826076		8310.73	14961.9	1.05209	2488.55	1189.84	20.3225	60.307	547.399	5.68379e-13	113.114	211.845	256.404	7.52938	71.6228	1206.77	2.98967	622.149	8310.73	1189.84	547.399	211.845
36335-67-8	BUTAMIFOS	Herbicide	Organophosphate	1.16	0.597541	41686.9	4.62	4.4945	0.00181316	0.999501								5.30273	7.90511	4.43219	1981.59	3.65502	1027.43	95.2897	4.30403	18.4104	3.86824		1371.79	3.77917	0.105417	2488.55	258.525	0.00841076	60.307	147.001	0.0527204	113.114	0.555704	256.404	1.58088	71.6228	58.3704	0.638455	622.149	1371.79	258.525	147.001	0.555704
36734-19-7	ROVRAL (IPRODIONE)	Fungicide	Other pesticide class	0.00356	194.704	1000	3	0.00031512	1.27125e-07	0.999949								4.98428	7.0998	4.18267	48.3353	3.46273	358842	88.454	4.05946	17.1503	3.81576		1459.43	1231.42	0.117374	2488.55	273.948	0.344813	60.307	155.164	0.000150948	113.114	0.598649	256.404	1.67613	71.6228	62.6592	0.647236	622.149	1459.43	273.948	155.164	0.598649
3689-24-5	SULFOTEPP	Insecticide, Acaricide	Organophosphate	2.17	0.319423	9772.37	3.99	0.44945	0.000181316	0.999854								5.27536	7.83296	4.41074	465.157	3.63849	2412.56	94.7022	4.28301	18.3021	3.86396		1378.91	2.0202	0.106388	2488.55	259.782	0.0358302	60.307	147.669	0.0224519	113.114	0.559152	256.404	1.58864	71.6228	58.7158	0.639162	622.149	1378.91	259.782	147.669	0.559152
37248-47-8	Validamycin	Fungicide, Antibiotic	Other pesticide class	5.72e-06	121180	4.7863e-09	-8.32	5.34647e-27	2.15686e-30	1.64477e-06								0.875155	0.791946	0.962917	0.82	0.981459	4.41753e+26	0.247219	0.903585	0.889988	0.825688		8311.94	766406	1.05226	2488.55	1189.96	20.3252	60.307	547.442	1.22617e-25	113.114	214.194	256.404	7.53019	71.6228	1207.46	2.99108	622.149	8311.94	1189.96	547.442	214.194
3739-38-6	M-PHENOXYBENZOIC ACID	Metabolite	Other pesticide class	0.965	0.718287	8128.31	3.91	0.00533755	2.15326e-06	0.999873								5.26818	7.81414	4.40512	387.039	3.63416	169047	94.5481	4.2775	18.2737	3.86283		1380.79	4.54284	0.106644	2488.55	260.114	0.043062	60.307	147.845	0.000320423	113.114	0.560063	256.404	1.59069	71.6228	58.807	0.639349	622.149	1380.79	260.114	147.845	0.560063
3766-81-2	N-METHYL O-SEC-BUTYL PHENYL CARBAMATE	Insecticide	Carbamate	0.132	5.25112	602.56	2.78	0.0059691	2.40804e-06	0.999952								4.79381	6.65149	4.03342	29.4508	3.34772	11572.1	84.3654	3.91318	16.3966	3.78131		1517.42	33.2109	0.125285	2488.55	284.085	0.565915	60.307	160.495	0.00468079	113.114	0.627662	256.404	1.73878	71.6228	65.5394	0.653133	622.149	1517.42	284.085	160.495	0.627662
3811-49-2	SALITHION	Insecticide	Organophosphate	0.935	0.741334	467.735	2.67	1.10331	0.000445097	0.999952								4.66636	6.36426	3.93356	23.0446	3.27076	49.0774	81.6295	3.81529	15.8922	3.75682		1558.87	4.6886	0.13094	2488.55	291.297	0.723236	60.307	164.271	1.1037	113.114	0.648698	256.404	1.78339	71.6228	67.6193	0.657391	622.149	1558.87	291.297	164.271	0.648698
38260-54-7	ETRIMFOS	Insecticide	Other pesticide class	0.732	0.946922	870.964	2.94	0.06262	2.5262e-05	0.99995								4.9399	6.99323	4.1479	42.2041	3.43593	1577.64	87.5014	4.02538	16.9747	3.80795		1472.54	5.98885	0.119163	2488.55	276.245	0.394906	60.307	156.374	0.0343339	113.114	0.605167	256.404	1.69032	71.6228	63.3074	0.648563	622.149	1472.54	276.245	156.374	0.605167
385-00-2	BENZOIC ACID, 2,6-DIFLUORO-	Metabolite	Other pesticide class	0.295	2.34965	38.9045	1.59	0.0121133	4.88674e-06	0.999888								2.33206	2.42375	2.10449	2.66856	1.8612	550.566	31.5212	2.02251	6.65511	2.90708		3119.23	14.8605	0.34382	2488.55	544.471	6.24556	60.307	288.68	0.0983836	113.114	1.67992	256.404	3.36422	71.6228	161.473	0.849546	622.149	3119.23	544.471	288.68	1.67992
38641-94-0	Glyphosate-isopropylammonium	Herbicide	Other pesticide class	0.0016	433.217	0.000398107	-3.4	2.121e-07	8.55649e-11	0.120342								0.875177	0.791968	0.962935	0.820019	0.981472	1.11356e+07	0.247695	0.903602	0.890075	0.825755		8311.73	2739.9	1.05223	2488.55	1189.94	20.3247	60.307	547.435	4.86427e-06	113.114	213.782	256.404	7.53005	71.6228	1207.34	2.99083	622.149	8311.73	1189.94	547.435	213.782
3878-19-1	FUBERIDAZOLE	Fungicide	Imidazole	0.551	1.25798	467.735	2.67	2.323e-06	9.3714e-10	0.999952								4.66636	6.36426	3.93356	23.0446	3.27076	2.33094e+07	81.6295	3.81529	15.8922	3.75682		1558.87	7.95615	0.13094	2488.55	291.297	0.723236	60.307	164.271	2.32381e-06	113.114	0.648698	256.404	1.78339	71.6228	67.6193	0.657391	622.149	1558.87	291.297	164.271	0.648698
39148-24-8	Fosetyl-aluminium	Fungicide	Organophosphate	0.00422	164.253	0.00398107	-2.4	8.67729e-10	3.50057e-13	0.577702								0.875376	0.792163	0.963091	0.820189	0.981593	2.72235e+09	0.251984	0.903755	0.890866	0.826362		8309.83	1038.82	1.05197	2488.55	1189.75	20.3205	60.307	547.367	1.9897e-08	113.114	210.144	256.404	7.52877	71.6228	1206.27	2.98864	622.149	8309.83	1189.75	547.367	210.144
39196-18-4	THIOFANOX	Insecticide, Acaricide	Carbamate	0.501	1.38353	562.341	2.75	0.00094839	3.82598e-07	0.999952								4.7614	6.57749	4.00802	27.5398	3.32814	68139	83.6695	3.88828	16.2683	3.77519		1527.75	8.75018	0.126695	2488.55	285.885	0.605184	60.307	161.439	0.000794944	113.114	0.632882	256.404	1.74992	71.6228	66.0562	0.654191	622.149	1527.75	285.885	161.439	0.632882
39300-45-3	DINOCAP	Fungicide, Acaricide	Other pesticide class	0.237	2.92467	954993	5.98	0.00048379	1.9517e-07	0.989475								5.31081	7.92652	4.43852	45377.6	3.6599	2.18557e+08	95.4632	4.31024	18.4424	3.8695		1369.7	18.4972	0.105132	2488.55	258.157	0.000367288	60.307	146.805	2.47837e-07	113.114	0.554695	256.404	1.57861	71.6228	58.2692	0.638248	622.149	1369.7	258.157	146.805	0.554695
39515-40-7	CYPHENOTHRIN	Insecticide	Pyrethroid	1.26	0.550117	4.16869e+06	6.62	4.50564	0.00181766	0.95574								5.31109	7.92728	4.43874	198078	3.66007	102437	95.4693	4.31045	18.4435	3.86954		1369.63	3.47924	0.105122	2488.55	258.144	8.41421e-05	60.307	146.798	0.000528778	113.114	0.554659	256.404	1.57853	71.6228	58.2656	0.63824	622.149	1369.63	258.144	146.798	0.554659
39515-41-8	FENPROPATHRIN	Insecticide, Acaricide	Pyrethroid	0.405	1.71147	501187	5.7	0.77164	0.000311293	0.994431								5.31047	7.92563	4.43826	23814.9	3.6597	71914.5	95.456	4.30998	18.441	3.86945		1369.79	10.8243	0.105144	2488.55	258.172	0.000699842	60.307	146.813	0.000753209	113.114	0.554736	256.404	1.5787	71.6228	58.2734	0.638256	622.149	1369.79	258.172	146.813	0.554736
404-86-4	6-Nonenamide, N- (4-hydroxy-3-methoxyphenyl)meth	Repellent, Insecticide, Miticide, Rodenticide	Botanical insecticide	0.0441	15.7176	10000	4	0.000121919	4.91842e-08	0.999852								5.27616	7.83508	4.41138	475.973	3.63898	9.10056e+06	94.7195	4.28363	18.3053	3.86409		1378.7	99.4068	0.106359	2488.55	259.745	0.035016	60.307	147.649	5.95202e-06	113.114	0.559049	256.404	1.58841	71.6228	58.7055	0.639141	622.149	1378.7	259.745	147.649	0.559049
40487-42-1	PENDIMETHALIN	Herbicide	Other pesticide class	0.234	2.96217	151356	5.18	0.086456	3.48779e-05	0.998286								5.30885	7.92132	4.43698	7192.56	3.65872	193856	95.4211	4.30873	18.4346	3.86919		1370.21	18.7344	0.105201	2488.55	258.246	0.00231721	60.307	146.853	0.000279417	113.114	0.554939	256.404	1.57916	71.6228	58.2937	0.638298	622.149	1370.21	258.246	146.853	0.554939
40596-69-8	METHOPRENE	Insecticide	Other pesticide class	1	0.693147	316228	5.5	0.69589	0.000280734	0.996466								5.31006	7.92454	4.43793	15026.5	3.65945	50315.4	95.4471	4.30966	18.4394	3.86938		1369.9	4.38384	0.105159	2488.55	258.191	0.00110915	60.307	146.823	0.00107654	113.114	0.554788	256.404	1.57882	71.6228	58.2785	0.638267	622.149	1369.9	258.191	146.823	0.554788
4104-14-7	Acetimidoylphosphoramidothioic acid, O,O-bis(p-Chlorophenyl) ester	Rodenticide	Organophosphate	6.82	0.101634	4897.79	3.69	0.00119269	4.81152e-07	0.999908								5.24027	7.74132	4.38325	233.54	3.61731	456639	93.9491	4.25607	18.1633	3.85841		1388.14	0.642792	0.107647	2488.55	261.412	0.0713654	60.307	148.534	0.00011862	113.114	0.563634	256.404	1.5987	71.6228	59.1646	0.640081	622.149	1388.14	261.412	148.534	0.563634
41083-11-8	Azocyclotin	Acaricide	Other pesticide class	20.4	0.0339778	199526	5.3	2.1715e-07	8.76022e-11	0.997753								5.30941	7.92281	4.43742	9481.37	3.65906	1.01742e+11	95.4331	4.30916	18.4368	3.86928		1370.06	0.214894	0.105181	2488.55	258.22	0.00175783	60.307	146.839	5.32394e-10	113.114	0.554869	256.404	1.579	71.6228	58.2867	0.638283	622.149	1370.06	258.22	146.839	0.554869
41198-08-7	PROFENOFOS	Insecticide, Acaricide	Organophosphate	1.12	0.618881	47863	4.68	0.0022321	9.00469e-07	0.999432								5.30382	7.90799	4.43304	2275.05	3.65568	2.37516e+06	95.3131	4.30487	18.4147	3.86841		1371.51	3.91414	0.105379	2488.55	258.476	0.00732586	60.307	146.975	2.28055e-05	113.114	0.555568	256.404	1.58058	71.6228	58.3567	0.638427	622.149	1371.51	258.476	146.975	0.555568
41394-05-2	Metamitron	Herbicide	Other pesticide class	0.0557	12.4443	6.76083	0.83	9.6253e-08	3.88302e-11	0.999533								1.22262	1.14158	1.23518	1.14124	1.19127	3.23144e+07	7.70594	1.17044	2.26495	1.65713		5949.7	78.7045	0.729981	2488.55	927.667	14.604	60.307	451.023	1.67624e-06	113.114	6.8717	256.404	5.81332	71.6228	474.457	1.49034	622.149	5949.7	927.667	451.023	6.8717
41483-43-6	BUPIRIMATE	Fungicide	Other pesticide class	0.163	4.25244	501.187	2.7	0.0014342	5.78582e-07	0.999952								4.7035	6.44695	3.96266	24.6341	3.29318	40337.2	82.4268	3.84382	16.0392	3.76408		1546.56	26.8947	0.12926	2488.55	289.158	0.67657	60.307	163.153	0.00134285	113.114	0.642424	256.404	1.77016	71.6228	66.9997	0.656122	622.149	1546.56	289.158	163.153	0.642424
41814-78-2	TRICYCLAZOLE	Fungicide	Other pesticide class	0.0913	7.59197	50.1187	1.7	3.1411e-06	1.26718e-09	0.999904								2.58969	2.76411	2.30636	3.20141	2.01677	2.51848e+06	37.0516	2.22038	7.67462	3.06555		2808.91	48.0158	0.301483	2488.55	496.814	5.20604	60.307	266.412	2.15077e-05	113.114	1.42917	256.404	3.06442	71.6228	140.023	0.805629	622.149	2808.91	496.814	266.412	1.42917
420-04-2	CYANAMIDE	Herbicide, Plant growth regulator	Other pesticide class	0.0127	54.5785	0.151356	-0.82	2.6159e-05	1.0553e-08	0.981101								0.883578	0.800168	0.969518	0.827192	0.986545	90927.7	0.428046	0.910054	0.923322	0.851083		8232.69	345.184	1.04145	2488.55	1181.86	20.1485	60.307	544.619	0.000595712	113.114	123.709	256.404	7.47666	71.6228	1163.86	2.90183	622.149	8232.69	1181.86	544.619	123.709
42576-02-3	BIFENOX	Herbicide	Other pesticide class	0.715	0.969437	30199.5	4.48	0.010908	4.40048e-06	0.999628								5.29952	7.89663	4.42968	1435.76	3.65309	306743	95.2209	4.30157	18.3977	3.86774		1372.62	6.13124	0.10553	2488.55	258.672	0.0116083	60.307	147.079	0.000176587	113.114	0.556106	256.404	1.58179	71.6228	58.4106	0.638537	622.149	1372.62	258.672	147.079	0.556106
42874-03-3	OXYFLUORFEN	Herbicide	Other pesticide class	7.21	0.0961369	53703.2	4.73	0.08282	3.34111e-05	0.999367								5.30461	7.91011	4.43367	2552.54	3.65616	71820.7	95.3302	4.30548	18.4179	3.86853		1371.3	0.608022	0.10535	2488.55	258.439	0.00652943	60.307	146.955	0.000754193	113.114	0.555468	256.404	1.58035	71.6228	58.3467	0.638406	622.149	1371.3	258.439	146.955	0.555468
43121-43-3	TRIADIMEFON	Fungicide, Metabolite	Triazole	2.68	0.258637	588.844	2.77	8.1911e-06	3.30444e-09	0.999952								4.7832	6.62718	4.02511	28.7991	3.34131	8.24756e+06	84.1375	3.90502	16.3545	3.77932		1520.79	1.63576	0.125745	2488.55	284.672	0.578722	60.307	160.803	6.5676e-06	113.114	0.629362	256.404	1.74241	71.6228	65.7078	0.653477	622.149	1520.79	284.672	160.803	0.629362
43222-48-6	Difenzoquat metilsulfate	Herbicide, Fungicide	Other pesticide class	0.463	1.49708	4.46684	0.65	2.27052e-12	9.15968e-16	0.999312								1.11099	1.02685	1.14771	1.03224	1.12387	1.25803e+12	5.30969	1.08471	1.82322	1.43113		6547.52	9.46834	0.81154	2488.55	998.365	16.1461	60.307	478.074	4.30569e-11	113.114	9.97287	256.404	6.27279	71.6228	589.409	1.7257	622.149	6547.52	998.365	478.074	9.97287
465-73-6	ISODRIN	Insecticide	Other pesticide class	100	0.00693147	3.16228e+06	6.5	4.444	0.00179279	0.966055								5.31106	7.92721	4.43872	150257	3.66006	78784.6	95.4687	4.31043	18.4434	3.86954		1369.64	0.0438384	0.105123	2488.55	258.145	0.000110921	60.307	146.799	0.000687528	113.114	0.554662	256.404	1.57853	71.6228	58.266	0.638241	622.149	1369.64	258.145	146.799	0.554662
4658-28-0	AZIPROTRYNE	Herbicide	Other pesticide class	0.112	6.18881	1000	3	6.77175e-08	2.73185e-11	0.999949								4.98428	7.0998	4.18267	48.3353	3.46273	1.66985e+09	88.454	4.05946	17.1503	3.81576		1459.43	39.1414	0.117374	2488.55	273.948	0.344813	60.307	155.164	3.2438e-08	113.114	0.598649	256.404	1.67613	71.6228	62.6592	0.647236	622.149	1459.43	273.948	155.164	0.598649
4685-14-7	PARAQUAT	Herbicide	Other pesticide class	0.202	3.43142	0.00194984	-2.71	5.58563e-09	2.25334e-12	0.401209								0.875263	0.792052	0.963002	0.820093	0.981524	4.22877e+08	0.249553	0.903668	0.890418	0.826018		8310.91	21.7022	1.05212	2488.55	1189.86	20.3229	60.307	547.405	1.28091e-07	113.114	212.191	256.404	7.5295	71.6228	1206.87	2.98988	622.149	8310.91	1189.86	547.405	212.191
470-82-6	1,8-CINEOLE	Fungicide	Botanical insecticide	1.17	0.592433	549.541	2.74	11.11	0.00448197	0.999952								4.75021	6.55211	3.99926	26.9316	3.32139	5.68903	83.4294	3.87969	16.224	3.77307		1531.35	3.74687	0.127186	2488.55	286.511	0.618851	60.307	161.767	9.52125	113.114	0.634703	256.404	1.75379	71.6228	66.2364	0.65456	622.149	1531.35	286.511	161.767	0.634703
470-90-6	CHLORFENVINPHOS	Insecticide, Acaricide, Veterinary treatment	Organophosphate	1.71	0.405349	6456.54	3.81	0.0029189	1.17754e-06	0.999891								5.25718	7.78537	4.3965	307.605	3.62752	245712	94.3121	4.26905	18.2302	3.8611		1383.67	2.56365	0.107038	2488.55	260.624	0.0541821	60.307	148.115	0.000220448	113.114	0.561465	256.404	1.59384	71.6228	58.9474	0.639636	622.149	1383.67	260.624	148.115	0.561465
4726-14-1	NITRALIN	Herbicide	Other pesticide class	0.0384	18.0507	831.764	2.92	0.00071104	2.86846e-07	0.99995								4.92393	6.9552	4.13538	40.3415	3.42629	132836	87.1585	4.01311	16.9115	3.80511		1477.32	114.162	0.119814	2488.55	277.08	0.413139	60.307	156.814	0.00040777	113.114	0.607547	256.404	1.69548	71.6228	63.544	0.649047	622.149	1477.32	277.08	156.814	0.607547
4824-78-6	BROMOPHOS ETHYL	Insecticide	Other pesticide class	21.7	0.0319423	1.41254e+06	6.15	0.661526	0.000266872	0.984527								5.31093	7.92684	4.43861	67118	3.65997	236413	95.4657	4.31033	18.4428	3.86952		1369.67	0.20202	0.105128	2488.55	258.151	0.000248319	60.307	146.802	0.000229118	113.114	0.55468	256.404	1.57857	71.6228	58.2677	0.638244	622.149	1369.67	258.151	146.802	0.55468
485-31-4	BINAPACRYL	Fungicide, Insecticide, Miticide	Other pesticide class	0.136	5.09667	30903	4.49	0.013534	5.45986e-06	0.99962								5.29979	7.89733	4.42988	1469.18	3.65324	252980	95.2266	4.30177	18.3987	3.86778		1372.55	32.2341	0.105521	2488.55	258.66	0.0113442	60.307	147.072	0.000214114	113.114	0.556073	256.404	1.58171	71.6228	58.4073	0.63853	622.149	1372.55	258.66	147.072	0.556073
49866-87-7	Difenzoquat	Herbicide, Fungicide	Other pesticide class	0.525	1.32028	5.12861	0.71	1.50381e-07	6.06663e-11	0.999396								1.14381	1.06035	1.17343	1.06369	1.14369	1.94815e+07	6.0143	1.10992	1.95311	1.50093		6359.62	8.35017	0.785906	2488.55	976.483	15.6688	60.307	469.789	2.78042e-06	113.114	8.80451	256.404	6.13032	71.6228	550.211	1.64544	622.149	6359.62	976.483	469.789	8.80451
50-00-0	Formaldehyde	Fungicide, Bactericide, Metabolite, Other product constituent	Other pesticide class	0.055	12.6027	2.23872	0.35	0.034037	1.37311e-05	0.998665								0.996573	0.911645	1.05806	0.926374	1.05478	76.6719	2.85359	0.996836	1.37045	1.16255		7299.25	79.7062	0.914099	2488.55	1082.96	17.9913	60.307	509.389	0.706473	113.114	18.5566	256.404	6.82577	71.6228	784.136	2.12438	622.149	7299.25	1082.96	509.389	18.5566
500-28-7	3-CHLORO-DIMETHYL PARATHION	Insecticide	Organophosphate	1.5	0.462098	2818.38	3.45	0.0039592	1.59721e-06	0.999931								5.1894	7.61007	4.34339	134.736	3.58659	79410.9	92.857	4.21699	17.9619	3.85025		1401.75	2.92256	0.109504	2488.55	263.811	0.123698	60.307	149.806	0.000682106	113.114	0.570263	256.404	1.61351	71.6228	59.8277	0.641438	622.149	1401.75	263.811	149.806	0.570263
50-14-6	Vitamin D2	Rodenticide	Other pesticide class	989	0.000700857	2.75423e+10	10.44	6.7062e-07	2.7054e-10	0.00326031								5.31118	7.9275	4.43881	1.30868e+09	3.66012	4547118234736093	95.4711	4.31052	18.4438	3.86955		1369.61	0.0044326	0.105119	2488.55	258.14	1.27355e-08	60.307	146.796	1.19123e-14	113.114	0.554649	256.404	1.5785	71.6228	58.2646	0.638238	622.149	1369.61	258.14	146.796	0.554649
50-29-3	p,p'-DDT	Insecticide	Organochlorine	161	0.00430526	8.12831e+06	6.91	0.84032	0.000339	0.917211								5.31113	7.92739	4.43877	386220	3.6601	1.07095e+06	95.4702	4.31049	18.4436	3.86955		1369.62	0.0272288	0.105121	2488.55	258.142	4.31533e-05	60.307	146.797	5.05782e-05	113.114	0.554654	256.404	1.57851	71.6228	58.2651	0.638239	622.149	1369.62	258.142	146.797	0.554654
50-30-6	2,6-DICHLOROBENZOIC ACID	Metabolite	Other pesticide class	0.61	1.13631	169.824	2.23	0.000205911	8.30684e-08	0.999944								3.89605	4.81727	3.32998	8.88926	2.80561	102783	65.094	3.22368	12.844	3.57799		1867.08	7.18662	0.172989	2488.55	344.097	1.87492	60.307	191.506	0.000527	113.114	0.813483	256.404	2.11068	71.6228	83.667	0.690247	622.149	1867.08	344.097	191.506	0.813483
50-31-7	2,3,6-TRICHLOROBENZOIC ACID	Herbicide	Other pesticide class	0.903	0.767605	512.861	2.71	0.0021412	8.63798e-07	0.999952								4.71548	6.47378	3.97204	25.1888	3.30041	27621.9	82.6838	3.85301	16.0866	3.7664		1542.63	4.85475	0.128724	2488.55	288.474	0.66167	60.307	162.795	0.001961	113.114	0.640426	256.404	1.76593	71.6228	66.8023	0.655718	622.149	1542.63	288.474	162.795	0.640426
504-24-5	4-AMINOPYRIDINE	Avicide, Acaricide, Repellent	Other pesticide class	0.0156	44.4325	2.0893	0.32	5.22763e-05	2.10892e-08	0.998572								0.988676	0.903781	1.05187	0.919274	1.05001	49604.4	2.68407	0.990771	1.3392	1.14241		7357.55	281.015	0.922053	2488.55	1089.33	18.1303	60.307	511.703	0.00109197	113.114	19.7286	256.404	6.86755	71.6228	802.433	2.16184	622.149	7357.55	1089.33	511.703	19.7286
50471-44-8	VINCLOZOLIN	Fungicide	Other pesticide class	1.13	0.613405	1258.93	3.1	0.0017574	7.08967e-07	0.999947								5.04752	7.25397	4.23222	60.6383	3.50092	80656.5	89.8114	4.10803	17.4005	3.82667		1441.15	3.8795	0.11488	2488.55	270.741	0.274854	60.307	153.472	0.000671572	113.114	0.589601	256.404	1.65631	71.6228	61.7581	0.645391	622.149	1441.15	270.741	153.472	0.589601
50512-35-1	IPT (ISOPROTHIOLANE)	Fungicide, Plant growth regulator	Other pesticide class	0.00746	92.9152	758.578	2.88	10.201	0.00411527	0.999951								4.89012	6.87523	4.10889	36.8641	3.40587	8.46475	86.4327	3.98714	16.7777	3.79904		1487.54	587.646	0.121208	2488.55	278.867	0.452111	60.307	157.755	6.39909	113.114	0.612649	256.404	1.70653	71.6228	64.0507	0.650085	622.149	1487.54	278.867	157.755	0.612649
50563-36-5	Dimethachlor	Herbicide	Other pesticide class	0.122	5.68153	147.911	2.17	0.00016665	6.72296e-08	0.999942								3.75972	4.57309	3.22315	7.84803	2.72329	112439	62.1675	3.11898	12.3045	3.53948		1934.78	35.9331	0.182225	2488.55	355.501	2.12367	60.307	197.295	0.000481742	113.114	0.851777	256.404	2.18154	71.6228	87.3353	0.697757	622.149	1934.78	355.501	197.295	0.851777
50594-66-6	ACIFLUORFEN	Herbicide, Metabolite	Other pesticide class	2.2	0.315067	5011.87	3.7	1.58327e-05	6.38718e-09	0.999907								5.24186	7.74545	4.3845	238.961	3.61827	3.51968e+07	93.9832	4.25729	18.1695	3.85867		1387.72	1.99265	0.10759	2488.55	261.337	0.0697465	60.307	148.494	1.53897e-06	113.114	0.563429	256.404	1.59824	71.6228	59.1441	0.640039	622.149	1387.72	261.337	148.494	0.563429
50-65-7	NICLOSAMIDE	Fungicide, Molluscide, Nematicide, Veterinary treatment	Other pesticide class	0.271	2.55774	36307.8	4.56	4.04e-07	1.62981e-10	0.99956								5.30148	7.90181	4.43121	1726	3.65427	9.95603e+09	95.2629	4.30307	18.4054	3.86805		1372.11	16.1765	0.105461	2488.55	258.583	0.00965625	60.307	147.031	5.44059e-09	113.114	0.555861	256.404	1.58123	71.6228	58.3861	0.638487	622.149	1372.11	258.583	147.031	0.555861
50-81-7	ASCORBIC ACID	Fungicide, Bactericide	Other pesticide class	0.000191	3629.04	0.0141254	-1.85	1.05091e-11	4.23956e-15	0.829154								0.875942	0.792714	0.963534	0.820671	0.981934	2.24889e+11	0.264124	0.904189	0.893104	0.828076		8304.47	22952	1.05124	2488.55	1189.2	20.3086	60.307	547.177	2.40859e-10	113.114	200.485	256.404	7.52516	71.6228	1203.24	2.98245	622.149	8304.47	1189.2	547.177	200.485
510-15-6	Chlorobenzilate	Insecticide, Acaricide, Miticide	Organochlorine	2.13	0.325421	54954.1	4.74	0.0073124	2.94995e-06	0.999353								5.30476	7.91051	4.43378	2611.98	3.65625	832379	95.3334	4.30559	18.4184	3.86856		1371.26	2.05814	0.105345	2488.55	258.432	0.00638085	60.307	146.952	6.50745e-05	113.114	0.555449	256.404	1.58031	71.6228	58.3448	0.638402	622.149	1371.26	258.432	146.952	0.555449
51-03-6	PIPERONYL BUTOXIDE	Other product constituent, Veterinary treatment	Other pesticide class	0.619	1.11979	56234.1	4.75	0.0164728	6.64543e-06	0.999339								5.30491	7.91089	4.4339	2672.8	3.65634	378103	95.3366	4.30571	18.419	3.86858		1371.23	7.08213	0.10534	2488.55	258.426	0.00623565	60.307	146.948	0.000143259	113.114	0.555431	256.404	1.58027	71.6228	58.343	0.638399	622.149	1371.23	258.426	146.948	0.555431
51218-45-2	metolachlor	Herbicide	Other pesticide class	0.184	3.7671	1348.96	3.13	0.000909	3.66707e-07	0.999946								5.06414	7.29494	4.24524	64.9164	3.51095	166902	90.1681	4.12079	17.4663	3.82949		1436.42	23.8252	0.114234	2488.55	269.91	0.25674	60.307	153.033	0.000324541	113.114	0.587268	256.404	1.65118	71.6228	61.5256	0.644915	622.149	1436.42	269.91	153.033	0.587268
51218-49-6	PRETILCHLOR	Herbicide	Other pesticide class	0.372	1.8633	12022.6	4.08	0.000808	3.25962e-07	0.999829								5.28202	7.85046	4.41596	572.08	3.64251	1.65033e+06	94.8451	4.28812	18.3284	3.86501		1377.17	11.7845	0.106151	2488.55	259.475	0.0291335	60.307	147.506	3.28217e-05	113.114	0.558309	256.404	1.58675	71.6228	58.6314	0.638989	622.149	1377.17	259.475	147.506	0.558309
51235-04-2	HEXAZINONE	Herbicide	Other pesticide class	0.00127	545.785	70.7946	1.85	2.2826e-07	9.20842e-11	0.999921								2.96395	3.29258	2.59962	4.18383	2.24277	4.46857e+07	45.0855	2.50782	9.1556	3.25279		2454.23	3451.84	0.253094	2488.55	440.77	3.98359	60.307	239.566	1.21217e-06	113.114	1.1745	256.404	2.71318	71.6228	117.373	0.759256	622.149	2454.23	440.77	239.566	1.1745
51338-27-3	DICLOFOP-METHYL	Herbicide	Other pesticide class	1.49	0.465199	41686.9	4.62	0.19897	8.02681e-05	0.999501								5.30273	7.90511	4.43219	1981.59	3.65502	23208.5	95.2897	4.30403	18.4104	3.86824		1371.79	2.94217	0.105417	2488.55	258.525	0.00841076	60.307	147.001	0.00233391	113.114	0.555704	256.404	1.58088	71.6228	58.3704	0.638455	622.149	1371.79	258.525	147.001	0.555704
51630-58-1	FENVALERATE	Insecticide, Acaricide	Pyrethroid	1.34	0.517274	1.58489e+06	6.2	0.0034845	1.40571e-06	0.982676								5.31095	7.92691	4.43863	75307.5	3.65999	5.03591e+07	95.4663	4.31035	18.4429	3.86952		1369.67	3.27152	0.105127	2488.55	258.15	0.000221315	60.307	146.801	1.07561e-06	113.114	0.554676	256.404	1.57857	71.6228	58.2673	0.638244	622.149	1369.67	258.15	146.801	0.554676
51707-55-2	THIDIAZURON	Plant growth regulator, Herbicide, Other product constituent	Other pesticide class	0.00568	122.033	58.8844	1.77	3.3633e-08	1.35682e-11	0.999913								2.76201	3.00219	2.44139	3.61791	2.12083	2.64065e+08	40.7507	2.35272	8.3565	3.15723		2633.67	771.803	0.277575	2488.55	469.337	4.60671	60.307	253.341	2.05126e-07	113.114	1.29944	256.404	2.89204	71.6228	128.597	0.782236	622.149	2633.67	469.337	253.341	1.29944
5221-53-4	Dimethirimol	Fungicide	Other pesticide class	0.0305	22.7261	2884.03	3.46	0.00025452	1.02678e-07	0.99993								5.1921	7.61698	4.3455	137.856	3.58822	1.26384e+06	92.9149	4.21907	17.9726	3.85068		1401.02	143.732	0.109405	2488.55	263.683	0.120899	60.307	149.738	4.28589e-05	113.114	0.569907	256.404	1.61272	71.6228	59.7922	0.641366	622.149	1401.02	263.683	149.738	0.569907
52315-07-8	CYPERMETHRIN	Insecticide, Veterinary Treatment	Pyrethroid	2.32	0.29877	3.98107e+06	6.6	0.04242	1.7113e-05	0.957646								5.31109	7.92727	4.43874	189163	3.66007	1.03907e+07	95.4692	4.31045	18.4435	3.86954		1369.63	1.88959	0.105122	2488.55	258.144	8.81075e-05	60.307	146.798	5.213e-06	113.114	0.55466	256.404	1.57853	71.6228	58.2657	0.63824	622.149	1369.63	258.144	146.798	0.55466
5234-68-4	CARBOXIN	Fungicide	Other pesticide class	0.0434	15.9711	138.038	2.14	3.232e-05	1.30385e-08	0.99994								3.68933	4.4501	3.168	7.37894	2.68078	545946	60.6565	3.06492	12.026	3.51859		1971.69	101.01	0.187262	2488.55	361.69	2.25868	60.307	200.423	9.92162e-05	113.114	0.872996	256.404	2.22002	71.6228	89.3581	0.701899	622.149	1971.69	361.69	200.423	0.872996
52-51-7	1,3-Propanediol, 2-bromo-2-nitro-	Bactericide, Fungicide, Veterinary treatment	Other pesticide class	0.0045	154.033	0.229087	-0.64	1.3433e-06	5.41911e-10	0.987421								0.887892	0.804382	0.972898	0.830885	0.98915	1.7771e+06	0.520645	0.913367	0.940392	0.863961		8192.7	974.187	1.03599	2488.55	1177.75	20.0589	60.307	543.185	3.04803e-05	113.114	101.706	256.404	7.44954	71.6228	1142.74	2.85857	622.149	8192.7	1177.75	543.185	101.706
5259-88-1	OXYCARBOXIN	Fungicide, Metabolite	Other pesticide class	0.0136	50.9667	5.88844	0.77	1.0706e-06	4.31899e-10	0.999469								1.18087	1.0984	1.20247	1.09979	1.16607	2.81503e+06	6.80982	1.13838	2.09976	1.5763		6160.04	322.341	0.758676	2488.55	952.902	15.1544	60.307	460.773	1.9242e-05	113.114	7.77596	256.404	5.97705	71.6228	511.784	1.56677	622.149	6160.04	952.902	460.773	7.77596
52645-53-1	PERMETHRIN	Insecticide, Veterinary treatment	Pyrethroid	1.85	0.374674	3.16228e+06	6.5	0.18887	7.61935e-05	0.966055								5.31106	7.92721	4.43872	150257	3.66006	1.85376e+06	95.4687	4.31043	18.4434	3.86954		1369.64	2.36964	0.105123	2488.55	258.145	0.000110921	60.307	146.799	2.922e-05	113.114	0.554662	256.404	1.57853	71.6228	58.266	0.638241	622.149	1369.64	258.145	146.799	0.554662
52-68-6	Trichlorofon	Insecticide, Veterinary treatment	Organophosphate	0.0957	7.24292	3.23594	0.51	1.717e-06	6.92669e-10	0.999065								1.04854	0.96368	1.09878	0.973757	1.08616	1.58421e+06	3.96919	1.03675	1.57611	1.28973		6937.47	45.8081	0.864741	2488.55	1042.83	17.1158	60.307	494.672	3.41916e-05	113.114	13.341	256.404	6.56298	71.6228	681.821	1.9149	622.149	6937.47	1042.83	494.672	13.341
527-20-8	PENTACHLOROANILINE	Metabolite	Other pesticide class	2.73	0.2539	66069.3	4.82	0.0833872	3.36399e-05	0.99923								5.30584	7.91336	4.43463	3140.13	3.6569	87751.3	95.3566	4.30642	18.4227	3.86873		1370.99	1.6058	0.105307	2488.55	258.383	0.00530764	60.307	146.925	0.000617275	113.114	0.555315	256.404	1.58	71.6228	58.3313	0.638375	622.149	1370.99	258.383	146.925	0.555315
52888-80-9	PROSULFOCARB	Herbicide	Other pesticide class	0.105	6.6014	44668.4	4.65	0.001313	5.29688e-07	0.999468								5.30329	7.9066	4.43263	2123.25	3.65536	3.76839e+06	95.3018	4.30446	18.4126	3.86833		1371.64	41.7509	0.105397	2488.55	258.5	0.00784959	60.307	146.987	1.4374e-05	113.114	0.555634	256.404	1.58072	71.6228	58.3633	0.63844	622.149	1371.64	258.5	146.987	0.555634
52918-63-5	DELTAMETHRIN	Insecticide, Metabolite, Veterinary treatment	Pyrethroid	0.544	1.27417	1.58489e+06	6.2	0.50399	0.000203319	0.982676								5.31095	7.92691	4.43863	75307.5	3.65999	348174	95.4663	4.31035	18.4429	3.86952		1369.67	8.05853	0.105127	2488.55	258.15	0.000221315	60.307	146.801	0.000155573	113.114	0.554676	256.404	1.57857	71.6228	58.2673	0.638244	622.149	1369.67	258.15	146.801	0.554676
53112-28-0	Pyrimethanil	Fungicide	Anilinopyrimidine	0.193	3.59144	691.831	2.84	0.0036158	1.45868e-06	0.999951								4.85369	6.78989	4.08034	33.6926	3.38387	21837.2	85.6506	3.95916	16.6335	3.79241		1498.7	22.7142	0.122732	2488.55	280.818	0.494669	60.307	158.78	0.00248048	113.114	0.618243	256.404	1.71859	71.6228	64.6059	0.651221	622.149	1498.7	280.818	158.78	0.618243
533-74-4	DMTT (DAZOMET)	Insecticide, Fungicide, Herbicide, Fumigant	Dithiocarbamate	0.00231	300.064	25.1189	1.4	5.0298e-05	2.02911e-08	0.999847								1.9397	1.93843	1.79705	2.01353	1.62428	102248	23.0987	1.72117	5.1025	2.59929		3750.19	1897.77	0.429901	2488.55	637.619	8.27733	60.307	330.788	0.000529755	113.114	2.29246	256.404	3.95322	71.6228	210.607	0.950141	622.149	3750.19	637.619	330.788	2.29246
534-52-1	4,6-Dinitro-o-cresol	Herbicide, Insecticide, Acaricide	Other pesticide class	0.0195	35.546	134.896	2.13	0.1414	5.70433e-05	0.99994								3.66557	4.40904	3.14938	7.22964	2.66643	122.327	60.1464	3.04667	11.932	3.51138		1984.48	224.812	0.189005	2488.55	363.829	2.30532	60.307	201.502	0.442801	113.114	0.8804	256.404	2.23331	71.6228	90.0624	0.70334	622.149	1984.48	363.829	201.502	0.8804
54-11-5	NICOTINE	Insecticide	Botanical insecticide	0.00721	96.1369	14.7911	1.17	0.000822016	3.31616e-07	0.999766								1.57062	1.5148	1.50786	1.5228	1.40141	4865.4	15.1762	1.43772	3.64204	2.1991		4631.43	608.022	0.550129	2488.55	759.907	10.9447	60.307	383.393	0.011133	113.114	3.48921	256.404	4.73262	71.6228	295.06	1.12305	622.149	4631.43	759.907	383.393	3.48921
542-75-6	1,3-Dichloropropene	Nematicide	Other pesticide class	0.557	1.24443	107.152	2.03	358.55	0.144645	0.999935								3.42103	3.99952	2.95777	5.91136	2.51877	0.0396746	54.8971	2.85886	10.9643	3.43197		2126.33	7.87045	0.208358	2488.55	387.398	2.81943	60.307	213.315	1365.27	113.114	0.964584	256.404	2.38003	71.6228	98.0109	0.719614	622.149	2126.33	387.398	213.315	0.964584
54406-48-3	EMPENTHRIN	Insecticide	Pyrethroid	1.36	0.509667	1.62181e+06	6.21	34.542	0.0139349	0.982281								5.31096	7.92693	4.43864	77061.7	3.65999	5198.41	95.4664	4.31035	18.443	3.86952		1369.66	3.22341	0.105127	2488.55	258.15	0.000216277	60.307	146.801	0.0104198	113.114	0.554676	256.404	1.57856	71.6228	58.2673	0.638244	622.149	1369.66	258.15	146.801	0.554676
54593-83-8	CHLORETHOXYFOS	Insecticide	Organophosphate	5.03	0.137803	38904.5	4.59	35.616	0.0143681	0.999531								5.30212	7.90352	4.43172	1849.38	3.65466	121.006	95.2768	4.30357	18.408	3.86815		1371.95	0.871539	0.105438	2488.55	258.553	0.00901203	60.307	147.016	0.447638	113.114	0.55578	256.404	1.58105	71.6228	58.3779	0.63847	622.149	1371.95	258.553	147.016	0.55578
55179-31-2	BITERTANOL	Fungicide	Triazole	8.26	0.0839161	14454.4	4.16	2.7371e-08	1.1042e-11	0.999802								5.2869	7.86331	4.41978	687.625	3.64546	5.85548e+10	94.9499	4.29187	18.3477	3.86577		1375.9	0.530731	0.105977	2488.55	259.251	0.024238	60.307	147.386	9.25059e-10	113.114	0.557693	256.404	1.58536	71.6228	58.5697	0.638863	622.149	1375.9	259.251	147.386	0.557693
55219-65-3	TRIADIMENOL	Fungicide	Triazole	2.79	0.24844	794.328	2.9	1.2928e-07	5.21539e-11	0.999951								4.90735	6.91587	4.12238	38.5628	3.41627	6.98539e+08	86.8025	4.00037	16.8458	3.80214		1482.31	1.57127	0.120496	2488.55	277.954	0.432196	60.307	157.274	7.75428e-08	113.114	0.610039	256.404	1.70088	71.6228	63.7916	0.649554	622.149	1482.31	277.954	157.274	0.610039
55283-68-6	ETHALFLURALIN	Herbicide	Other pesticide class	0.681	1.01784	128825	5.11	12.928	0.00521539	0.998535								5.30844	7.92024	4.43666	6121.98	3.65847	1103.45	95.4123	4.30842	18.433	3.86913		1370.31	6.43736	0.105216	2488.55	258.265	0.00272243	60.307	146.862	0.0490884	113.114	0.55499	256.404	1.57927	71.6228	58.2988	0.638308	622.149	1370.31	258.265	146.862	0.55499
55285-14-8	Carbamic acid, [(dibutylamino)thio]methyl-, 2,3-	Insecticide, Nematicide	Carbamate	9.57	0.0724292	371535	5.57	0.051712	2.08615e-05	0.995856								5.31023	7.92498	4.43806	17654.4	3.65955	795511	95.4507	4.30979	18.4401	3.86941		1369.85	0.458081	0.105153	2488.55	258.183	0.00094405	60.307	146.819	6.80904e-05	113.114	0.554767	256.404	1.57877	71.6228	58.2764	0.638262	622.149	1369.85	258.183	146.819	0.554767
55290-64-7	DIMETHIPIN	Herbicide, Plant growth regulator	Other pesticide class	0.0358	19.3617	0.676083	-0.17	2.323e-06	9.3714e-10	0.995678								0.912536	0.828523	0.992208	0.852124	1.00403	1.04893e+06	1.04966	0.932295	1.03791	0.935935		7971.44	122.454	1.00581	2488.55	1154.83	19.559	60.307	535.134	5.16398e-05	113.114	50.4477	256.404	7.2983	71.6228	1035.37	2.63875	622.149	7971.44	1154.83	535.134	50.4477
55335-06-3	TRICLOPYR	Herbicide	Other pesticide class	1.58	0.438701	338.844	2.53	9.7566e-05	3.93599e-08	0.999951								4.46772	5.93561	3.77791	16.9203	3.15081	408723	77.3654	3.66273	15.1062	3.71609		1628.18	2.77458	0.140395	2488.55	303.298	0.985011	60.307	170.525	0.000132527	113.114	0.684452	256.404	1.85768	71.6228	71.1379	0.664595	622.149	1628.18	303.298	170.525	0.684452
55-38-9	FENTHION	Insecticide, Veterinary treatment	Organophosphate	2.52	0.275058	12302.7	4.09	0.14746	5.9488e-05	0.999826								5.28268	7.8522	4.41648	585.386	3.64291	9253.18	94.8593	4.28863	18.331	3.86511		1377	1.73962	0.106127	2488.55	259.445	0.0284712	60.307	147.49	0.00585385	113.114	0.558226	256.404	1.58656	71.6228	58.623	0.638972	622.149	1377	259.445	147.49	0.558226
554-00-7	2,4-DICHLOROANILINE	Metabolite	Other pesticide class	0.55	1.26027	602.56	2.78	0.522645	0.000210844	0.999952								4.79381	6.65149	4.03342	29.4508	3.34772	132.165	84.3654	3.91318	16.3966	3.78131		1517.42	7.97062	0.125285	2488.55	284.085	0.565915	60.307	160.495	0.409843	113.114	0.627662	256.404	1.73878	71.6228	65.5394	0.653133	622.149	1517.42	284.085	160.495	0.627662
55512-33-9	Pyridate	Herbicide	Other pesticide class	4.44	0.156114	537032	5.73	3.2724e-05	1.32014e-08	0.994038								5.31052	7.92576	4.43829	25518.1	3.65973	1.81704e+09	95.457	4.31002	18.4412	3.86945		1369.78	0.987351	0.105142	2488.55	258.17	0.000653132	60.307	146.812	2.98105e-08	113.114	0.55473	256.404	1.57869	71.6228	58.2728	0.638255	622.149	1369.78	258.17	146.812	0.55473
555-37-3	NEBURON	Herbicide	Other pesticide class	0.307	2.25781	12589.3	4.1	0.02125	8.57263e-06	0.999823								5.28332	7.8539	4.41698	599.003	3.6433	65703.5	94.8731	4.28913	18.3336	3.86521		1376.83	14.2796	0.106104	2488.55	259.415	0.027824	60.307	147.474	0.00082441	113.114	0.558144	256.404	1.58638	71.6228	58.6149	0.638955	622.149	1376.83	259.415	147.474	0.558144
556-61-6	METHYL ISOTHIOCYANATE	Metabolite, Fungicide, Nematicide, Herbicide, Insecticide	Other pesticide class	0.0645	10.7465	8.70964	0.94	4.5248	0.00182539	0.999629								1.31289	1.23609	1.30591	1.23384	1.24578	0.735087	9.64376	1.23978	2.62217	1.81861		5540.61	67.9665	0.674168	2488.55	877.42	13.508	60.307	431.288	73.6875	113.114	5.4909	256.404	5.48822	71.6228	409.821	1.35801	622.149	5540.61	877.42	431.288	5.4909
5598-13-0	CHLORPYRIFOS METHYL	Insecticide, Acaricide	Organophosphate	1.4	0.495105	20417.4	4.31	0.37875	0.000152795	0.999736								5.29396	7.88194	4.42532	970.959	3.64973	5974.66	95.1015	4.2973	18.3757	3.86687		1374.06	3.13131	0.105727	2488.55	258.927	0.0171652	60.307	147.214	0.00906606	113.114	0.556804	256.404	1.58336	71.6228	58.4806	0.63868	622.149	1374.06	258.927	147.214	0.556804
5598-52-7	Fospirate	Insecticide	Organophosphate	0.0446	15.5414	81.2831	1.91	0.00342207	1.38053e-06	0.999926								3.11702	3.52135	2.71956	4.68219	2.3352	3319.98	48.3712	2.62537	9.7613	3.31795		2333.71	98.2924	0.236652	2488.55	421.331	3.55959	60.307	230.084	0.0163154	113.114	1.09472	256.404	2.59169	71.6228	110.09	0.744345	622.149	2333.71	421.331	230.084	1.09472
56073-07-5	DIFENACOUM	Rodenticide	Other pesticide class	55.6	0.0124667	4.16869e+07	7.62	2.29435	0.000925581	0.683638								5.31117	7.92748	4.4388	1.98077e+06	3.66012	2.01166e+06	95.4709	4.31051	18.4438	3.86955		1369.61	0.078846	0.10512	2488.55	258.14	8.41424e-06	60.307	146.796	2.69264e-05	113.114	0.55465	256.404	1.5785	71.6228	58.2647	0.638238	622.149	1369.61	258.14	146.796	0.55465
56073-10-0	Brodifacoum	Rodenticide	Other pesticide class	351	0.00197478	3.16228e+08	8.5	2.03862e-11	8.22417e-15	0.221721								5.31117	7.9275	4.43881	1.50257e+07	3.66012	1.71742e+18	95.4711	4.31052	18.4438	3.86955		1369.61	0.0124896	0.105119	2488.55	258.14	1.10921e-06	60.307	146.796	3.15396e-17	113.114	0.554649	256.404	1.5785	71.6228	58.2646	0.638238	622.149	1369.61	258.14	146.796	0.554649
56-23-5	carbon tetrachloride (CCl4)	Insecticide, Fumigant, Other product constituent	Organochlorine	1.21	0.572849	676.083	2.83	2787.6	1.12457	0.999951								4.84415	6.7677	4.07287	32.9443	3.37811	0.0276996	85.4459	3.95184	16.5958	3.79066		1501.65	3.62301	0.123134	2488.55	281.333	0.505904	60.307	159.051	1955.5	113.114	0.619724	256.404	1.72177	71.6228	64.7528	0.651522	622.149	1501.65	281.333	159.051	0.619724
563-12-2	ETHION	Insecticide, Acaricide, Metabolite	Organophosphate	3.41	0.203269	117490	5.07	0.038279	1.54424e-05	0.998661								5.30817	7.91954	4.43646	5583.38	3.65831	339884	95.4067	4.30821	18.4319	3.86909		1370.38	1.28558	0.105225	2488.55	258.277	0.00298505	60.307	146.869	0.000159368	113.114	0.555023	256.404	1.57935	71.6228	58.3021	0.638315	622.149	1370.38	258.277	146.869	0.555023
56-38-2	Parathion	Insecticide, Acaricide	Organophosphate	1.76	0.393834	6760.83	3.83	0.030098	1.21421e-05	0.999888								5.25959	7.79165	4.39838	322.063	3.62897	24948.4	94.3636	4.2709	18.2397	3.86148		1383.04	2.49082	0.106952	2488.55	260.512	0.0517497	60.307	148.056	0.00217115	113.114	0.561158	256.404	1.59315	71.6228	58.9167	0.639573	622.149	1383.04	260.512	148.056	0.561158
56425-91-3	FLURPRIMIDOL	Plant growth regulator	Other pesticide class	4.97	0.139466	2187.76	3.34	0.00013231	5.33762e-08	0.999937								5.15553	7.52374	4.31685	104.772	3.56614	1.84856e+06	92.13	4.19098	17.8279	3.84473		1410.96	0.88206	0.11076	2488.55	265.433	0.159075	60.307	150.665	2.9302e-05	113.114	0.574763	256.404	1.62353	71.6228	60.2775	0.642359	622.149	1410.96	265.433	150.665	0.574763
56634-95-8	Bromoxynil heptanoate	Herbicide	Other pesticide class	0.643	1.07799	234423	5.37	0.409405	0.000165161	0.997368								5.30967	7.92351	4.43763	11139.5	3.65921	63401.4	95.4388	4.30936	18.4379	3.86932		1370	6.81779	0.105172	2488.55	258.208	0.00149618	60.307	146.833	0.000854345	113.114	0.554836	256.404	1.57893	71.6228	58.2834	0.638277	622.149	1370	258.208	146.833	0.554836
56-81-5	GLYCEROL	Other product constituent, Adjuvant	Other pesticide class	0.00228	304.012	0.017378	-1.76	0.0017473	7.04892e-07	0.856538								0.876123	0.792891	0.963676	0.820826	0.982044	1352.8	0.268015	0.904329	0.893821	0.828626		8302.75	1922.74	1.05101	2488.55	1189.02	20.3048	60.307	547.116	0.0400405	113.114	197.574	256.404	7.524	71.6228	1202.28	2.98047	622.149	8302.75	1189.02	547.116	197.574
56-86-0	GLUTAMIC ACID	Plant growth regulator, Fungicide	Botanical insecticide	0.00946	73.2714	0.000204174	-3.69	3.89142e-08	1.56987e-11	0.0655626								0.875166	0.791957	0.962926	0.82001	0.981465	6.06936e+07	0.247463	0.903593	0.890033	0.825723		8311.83	463.408	1.05225	2488.55	1189.95	20.325	60.307	547.438	8.92461e-07	113.114	213.983	256.404	7.53012	71.6228	1207.4	2.99095	622.149	8311.83	1189.95	547.438	213.983
57018-04-9	TOLCLOFOS-METHYL	Fungicide	Other pesticide class	5.39	0.128599	36307.8	4.56	15.554	0.00627476	0.99956								5.30148	7.90181	4.43121	1726	3.65427	258.598	95.2629	4.30307	18.4054	3.86805		1372.11	0.813328	0.105461	2488.55	258.583	0.00965625	60.307	147.031	0.209463	113.114	0.555861	256.404	1.58123	71.6228	58.3861	0.638487	622.149	1372.11	258.583	147.031	0.555861
57-13-6	UREA	Fungicide, Insecticide, Microbiocide, Other product constitiuent	Other pesticide class	0.000254	2728.93	0.00776247	-2.11	1.7574e-07	7.08967e-11	0.727316								0.875587	0.792368	0.963256	0.820369	0.98172	1.34442e+07	0.256509	0.903917	0.8917	0.827001		8307.83	17259.2	1.0517	2488.55	1189.54	20.3161	60.307	547.296	4.02901e-06	113.114	206.436	256.404	7.52742	71.6228	1205.14	2.98633	622.149	8307.83	1189.54	547.296	206.436
57213-69-1	2,4,5-T triethylammonium salt	Herbicide	Other pesticide class	6.26	0.110726	31.6228	1.5	3.77352e-09	1.52231e-12	0.999871								2.13693	2.17763	1.9516	2.32257	1.74338	1.55372e+09	27.3326	1.87265	5.88298	2.76582		3404.05	0.700294	0.382678	2488.55	587.126	7.17597	60.307	308.191	3.48626e-08	113.114	1.93735	256.404	3.63344	71.6228	182.666	0.892936	622.149	3404.05	587.126	308.191	1.93735
57369-32-1	PYROQUILON	Fungicide	Other pesticide class	0.0447	15.5066	37.1535	1.57	6.9084e-06	2.78697e-09	0.999884								2.28736	2.36651	2.06947	2.58536	1.83421	937312	30.5617	1.98818	6.47824	2.87652		3180.19	98.0725	0.352136	2488.55	553.686	6.44655	60.307	292.928	5.77893e-05	113.114	1.73266	256.404	3.42231	71.6228	165.882	0.858572	622.149	3180.19	553.686	292.928	1.73266
57-55-6	1,2-PROPANEDIOL	Other product constituent, Veterinary treatment	Other pesticide class	0.00871	79.5806	0.120226	-0.92	0.0013029	5.25613e-07	0.976333								0.881848	0.798478	0.968162	0.825713	0.985501	1822.96	0.390911	0.908726	0.916476	0.845895		8248.84	503.311	1.04365	2488.55	1183.51	20.1846	60.307	545.197	0.0297136	113.114	135.46	256.404	7.48759	71.6228	1172.56	2.91963	622.149	8248.84	1183.51	545.197	135.46
57-62-5	AUREOMYCIN	Bactericide, Fungicide, Wood preservative, Antimicrobial, Veterinary treatment	Other pesticide class	3.39e-05	20446.8	0.239883	-0.62	5.91898e-20	2.38782e-23	0.987978								0.888491	0.804967	0.973367	0.831398	0.989512	4.03512e+19	0.533492	0.913827	0.94276	0.865741		8187.18	129317	1.03524	2488.55	1177.19	20.0466	60.307	542.987	1.34238e-18	113.114	99.2572	256.404	7.44579	71.6228	1139.87	2.8527	622.149	8187.18	1177.19	542.987	99.2572
57646-30-7	FURALAXYL	Fungicide	Other pesticide class	0.027	25.6721	407.38	2.61	9.1405e-05	3.68744e-08	0.999951								4.58644	6.18908	3.87093	20.1768	3.22249	519289	79.9138	3.75391	15.5759	3.74082		1586.03	162.364	0.134646	2488.55	296.01	0.826031	60.307	166.732	0.000104309	113.114	0.662625	256.404	1.81256	71.6228	68.9923	0.660202	622.149	1586.03	296.01	166.732	0.662625
57-74-9	Chlordane	Insecticide	Organochlorine	129	0.00537323	1.44544e+06	6.16	4.9086	0.00198022	0.984173								5.31093	7.92685	4.43862	68681.4	3.65998	32603.3	95.4658	4.31033	18.4429	3.86952		1369.67	0.0339833	0.105128	2488.55	258.151	0.000242666	60.307	146.802	0.00166139	113.114	0.554679	256.404	1.57857	71.6228	58.2676	0.638244	622.149	1369.67	258.151	146.802	0.554679
57808-65-8	Closantel	Insecticide, Acaricide, Veterinary treatment	Other pesticide class	1	0.693147	1.28825e+08	8.11	2.47946e-07	1.00026e-10	0.411524								5.31117	7.9275	4.43881	6.12116e+06	3.66012	5.75249e+13	95.471	4.31052	18.4438	3.86955		1369.61	4.38384	0.105119	2488.55	258.14	2.7228e-06	60.307	146.796	9.4162e-13	113.114	0.554649	256.404	1.5785	71.6228	58.2646	0.638238	622.149	1369.61	258.14	146.796	0.554649
57837-19-1	METALAXYL	Fungicide	Other pesticide class	0.0103	67.2958	44.6684	1.65	0.00029795	1.20198e-07	0.999897								2.47029	2.60411	2.2128	2.94243	1.94467	24525.4	34.4884	2.12867	7.2021	2.99562		2944.69	425.616	0.320007	2488.55	517.821	5.66425	60.307	276.289	0.00220859	113.114	1.53538	256.404	3.19644	71.6228	149.209	0.824437	622.149	2944.69	517.821	276.289	1.53538
57966-95-7	Cymoxanil	Fungicide	Other pesticide class	0.00355	195.253	17378	4.24	3.3431e-05	1.34867e-08	0.99977								5.29096	7.87403	4.42297	826.542	3.64792	5.7623e+07	95.0372	4.29499	18.3638	3.86641		1374.84	1234.88	0.105833	2488.55	259.064	0.0201643	60.307	147.287	9.40018e-07	113.114	0.557181	256.404	1.58421	71.6228	58.5184	0.638758	622.149	1374.84	259.064	147.287	0.557181
58138-08-2	Oxirane, 2-(3,5-dichlorophenyl)-2-(2,2,2-trichlo	Herbicide	Other pesticide class	8.76	0.0791264	151356	5.18	47.2959	0.01908	0.998286								5.30885	7.92132	4.43698	7192.56	3.65872	354.364	95.4211	4.30873	18.4346	3.86919		1370.21	0.500438	0.105201	2488.55	258.246	0.00231721	60.307	146.853	0.152856	113.114	0.554939	256.404	1.57916	71.6228	58.2937	0.638298	622.149	1370.21	258.246	146.853	0.554939
5836-29-3	Endrocide (Endox) (Coumatetralyl)	Rodenticide	Other pesticide class	1.62	0.427869	16982.4	4.23	6.2171e-07	2.50809e-10	0.999774								5.29049	7.87279	4.4226	807.746	3.64763	3.0281e+09	95.0271	4.29463	18.362	3.86633		1374.96	2.70607	0.10585	2488.55	259.086	0.0206335	60.307	147.299	1.7888e-08	113.114	0.55724	256.404	1.58434	71.6228	58.5243	0.63877	622.149	1374.96	259.086	147.299	0.55724
584-79-2	ALLETHRIN	Insecticide	Pyrethroid	0.497	1.39466	60256	4.78	0.010504	4.2375e-06	0.999295								5.30533	7.912	4.43423	2863.9	3.65659	635348	95.3455	4.30603	18.4207	3.86865		1371.12	8.8206	0.105325	2488.55	258.407	0.00581957	60.307	146.938	8.52551e-05	113.114	0.555379	256.404	1.58015	71.6228	58.3378	0.638388	622.149	1371.12	258.407	146.938	0.555379
58-89-9	gamma-HCH (lindane)	Insecticide, Acaricide	Organochlorine	17	0.0407734	5248.07	3.72	0.51914	0.00020943	0.999904								5.24494	7.75344	4.38691	250.184	3.62012	1123.8	94.0492	4.25965	18.1817	3.85916		1386.91	0.257873	0.107479	2488.55	261.194	0.0666176	60.307	148.418	0.0481995	113.114	0.563034	256.404	1.59735	71.6228	59.1045	0.639958	622.149	1386.91	261.194	148.418	0.563034
5902-51-2	TERBACIL	Herbicide	Other pesticide class	0.0189	36.6745	77.6247	1.89	1.212e-05	4.88942e-09	0.999925								3.06595	3.44416	2.67954	4.50836	2.30436	903974	47.275	2.58615	9.55922	3.29684		2372.59	231.949	0.241955	2488.55	427.623	3.69683	60.307	233.163	5.99206e-05	113.114	1.1201	256.404	2.631	71.6228	112.417	0.74911	622.149	2372.59	427.623	233.163	1.1201
5902-95-4	CMA	Herbicide	Other pesticide class	0.00966	71.7544	0.0660693	-1.18	8.96683e-06	3.61738e-09	0.95778								0.878836	0.795537	0.965802	0.823139	0.983681	264211	0.326237	0.906412	0.904554	0.836826		8277.12	453.814	1.04751	2488.55	1186.41	20.2477	60.307	546.205	0.000205013	113.114	162.314	256.404	7.50671	71.6228	1188.01	2.95127	622.149	8277.12	1186.41	546.205	162.314
591-27-5	PHENOL, 3-AMINO-	Metabolite	Other pesticide class	0.0133	52.1163	1.62181	0.21	0.00100238	4.04378e-07	0.998172								0.963783	0.879063	1.03236	0.897061	1.03498	2535.35	2.14971	0.971652	1.2407	1.0774		7547.58	329.612	0.947979	2488.55	1109.91	18.5792	60.307	519.134	0.0213646	113.114	24.6325	256.404	7.00268	71.6228	866.142	2.29227	622.149	7547.58	1109.91	519.134	24.6325
5915-41-3	TERBUTHYLAZINE	Herbicide, Microbiocide, Algicide	Other pesticide class	0.226	3.06702	1621.81	3.21	0.0037572	1.51572e-06	0.999943								5.10375	7.39339	4.27628	77.8808	3.53487	48419.9	91.0186	4.15122	17.623	3.83616		1425.27	19.3975	0.112713	2488.55	267.951	0.214002	60.307	151.997	0.00111869	113.114	0.581781	256.404	1.63908	71.6228	60.9782	0.643794	622.149	1425.27	267.951	151.997	0.581781
593-81-7	Trimethylamine, Hydrochloride	Attractant	Other pesticide class	0.013	53.319	0.00186209	-2.73	2.11528e-08	8.53343e-12	0.390198								0.875258	0.792048	0.962999	0.820088	0.981521	1.11665e+08	0.249448	0.903664	0.890399	0.826003		8310.95	337.218	1.05213	2488.55	1189.86	20.323	60.307	547.407	4.85083e-07	113.114	212.281	256.404	7.52953	71.6228	1206.9	2.98994	622.149	8310.95	1189.86	547.407	212.281
59669-26-0	THIODICARB	Insecticide, Molluscicide, Ovicide	Carbamate	0.352	1.96917	50.1187	1.7	0.094233	3.80153e-05	0.999904								2.58969	2.76411	2.30636	3.20141	2.01677	83.9493	37.0516	2.22038	7.67462	3.06555		2808.91	12.4541	0.301483	2488.55	496.814	5.20604	60.307	266.412	0.645231	113.114	1.42917	256.404	3.06442	71.6228	140.023	0.805629	622.149	2808.91	496.814	266.412	1.42917
59756-60-4	Fluridone	Herbicide	Other pesticide class	0.444	1.56114	1445.44	3.16	0.0008181	3.30036e-07	0.999945								5.07977	7.33364	4.25748	69.5005	3.52039	198504	90.5036	4.13279	17.5281	3.83214		1432	9.87351	0.113632	2488.55	269.134	0.239806	60.307	152.623	0.000272875	113.114	0.585092	256.404	1.64638	71.6228	61.3085	0.64447	622.149	1432	269.134	152.623	0.585092
60-00-4	ETHYLENEDIAMINE TETRAACETIC ACID	Adjuvant, Other	Other pesticide class	0.000425	1630.93	0.000138038	-3.86	5.8277e-11	2.351e-14	0.0452876								0.875162	0.791954	0.962923	0.820007	0.981463	4.05277e+10	0.247384	0.903591	0.890018	0.825711		8311.87	10314.9	1.05225	2488.55	1189.95	20.325	60.307	547.439	1.33653e-09	113.114	214.051	256.404	7.53014	71.6228	1207.42	2.99099	622.149	8311.87	1189.95	547.439	214.051
60168-88-9	FENARIMOL	Fungicide	Other pesticide class	17.9	0.0387233	3981.07	3.6	0.000707	2.85216e-07	0.999918								5.22427	7.69982	4.37071	189.982	3.60764	626779	93.6055	4.24377	18.0999	3.85586		1392.39	0.244907	0.108228	2488.55	262.162	0.0877276	60.307	148.931	8.64207e-05	113.114	0.565703	256.404	1.60333	71.6228	59.3716	0.640505	622.149	1392.39	262.162	148.931	0.565703
60207-31-0	AZACONAZOL	Fungicide	Triazole	1.82	0.38085	208.93	2.32	8.6961e-06	3.50816e-09	0.999947								4.08788	5.17484	3.48028	10.7474	2.92144	2.93163e+06	69.2118	3.37101	13.6031	3.62824		1779.46	2.4087	0.161036	2488.55	329.236	1.55077	60.307	183.913	1.84766e-05	113.114	0.765085	256.404	2.01844	71.6228	78.9982	0.680688	622.149	1779.46	329.236	183.913	0.765085
60207-90-1	PROPICONAZOLE	Fungicide	Triazole	6.2	0.111798	5248.07	3.72	0.00017372	7.00818e-08	0.999904								5.24494	7.75344	4.38691	250.184	3.62012	3.35834e+06	94.0492	4.25965	18.1817	3.85916		1386.91	0.707071	0.107479	2488.55	261.194	0.0666176	60.307	148.418	1.6129e-05	113.114	0.563034	256.404	1.59735	71.6228	59.1045	0.639958	622.149	1386.91	261.194	148.418	0.563034
60-35-5	Acetamide	Other product constituent	Other pesticide class	0.00375	184.839	0.0549541	-1.26	0.000140018	5.64857e-08	0.949676								0.878217	0.794933	0.965317	0.822611	0.983308	16911.4	0.312953	0.905937	0.902105	0.834958		8282.96	1169.02	1.04831	2488.55	1187	20.2607	60.307	546.413	0.00320296	113.114	169.204	256.404	7.51064	71.6228	1191.24	2.95787	622.149	8282.96	1187	546.413	169.204
60-51-5	Dimethoate	Insecticide, Acaricide, Metabolite	Organophosphate	0.03	23.1049	6.0256	0.78	2.4543e-05	9.90109e-09	0.99948								1.18749	1.10523	1.20765	1.10631	1.17006	123414	6.95192	1.14347	2.12595	1.5894		6125.7	146.128	0.753991	2488.55	948.809	15.0651	60.307	459.199	0.000438902	113.114	7.61701	256.404	5.95047	71.6228	505.478	1.55386	622.149	6125.7	948.809	459.199	7.61701
60-56-0	METHIMAZOLE	Veterinary treatment, Metabolite	Other pesticide class	0.00819	84.6334	0.457088	-0.34	4.93066e-05	1.98912e-08	0.993637								0.900497	0.816716	0.982774	0.841719	0.996761	48927.1	0.79122	0.923048	0.99027	0.901109		8078.02	535.267	1.02035	2488.55	1165.92	19.8008	60.307	539.037	0.00110709	113.114	66.9256	256.404	7.37141	71.6228	1085.18	2.74073	622.149	8078.02	1165.92	539.037	66.9256
60-57-1	Dieldrin	Insecticide, Metabolite	Other pesticide class	103	0.00672958	251189	5.4	1.01	0.000407452	0.997183								5.30977	7.92378	4.43771	11936.1	3.65927	27537.7	95.4409	4.30944	18.4383	3.86934		1369.97	0.0425616	0.105169	2488.55	258.204	0.00139632	60.307	146.83	0.001967	113.114	0.554824	256.404	1.5789	71.6228	58.2821	0.638274	622.149	1369.97	258.204	146.83	0.554824
608-93-5	pentachlorobenzene	Metabolite	Other pesticide class	13.7	0.0505947	147911	5.17	71.003	0.0286439	0.998324								5.30879	7.92118	4.43694	7028.85	3.65868	230.674	95.4199	4.30869	18.4344	3.86918		1370.22	0.319988	0.105203	2488.55	258.249	0.00237118	60.307	146.854	0.234819	113.114	0.554946	256.404	1.57917	71.6228	58.2944	0.638299	622.149	1370.22	258.249	146.854	0.554946
609-20-1	1,4-Benzenediamine, 2,6-dichloro-	Metabolite, Fungicide	Other pesticide class	0.037	18.7337	7.94328	0.9	0.000836505	3.37461e-07	0.999597								1.27787	1.19924	1.27847	1.19743	1.22464	3874.78	8.89203	1.21288	2.4836	1.75801		5692.45	118.482	0.694883	2488.55	896.252	13.9187	60.307	438.735	0.0139793	113.114	5.9551	256.404	5.60993	71.6228	432.688	1.40483	622.149	5692.45	896.252	438.735	5.9551
61213-25-0	FLUROCHLORIDONE	Herbicide	Other pesticide class	1.76	0.393834	2290.87	3.36	0.0038986	1.57277e-06	0.999936								5.1623	7.54093	4.32216	109.671	3.57022	65664.3	92.2753	4.19618	17.8547	3.84584		1409.11	2.49082	0.110508	2488.55	265.107	0.151969	60.307	150.492	0.000824903	113.114	0.573858	256.404	1.62151	71.6228	60.187	0.642174	622.149	1409.11	265.107	150.492	0.573858
6164-98-3	CHLORDIMEFORM	Acaricide, Insecticide	Other pesticide class	0.968	0.716061	776.247	2.89	0.034845	1.40571e-05	0.999951								4.89881	6.89571	4.1157	37.7036	3.41112	2534.23	86.6193	3.99382	16.8121	3.80061		1484.9	4.52876	0.120848	2488.55	278.406	0.442044	60.307	157.512	0.021374	113.114	0.611329	256.404	1.70367	71.6228	63.9197	0.649816	622.149	1484.9	278.406	157.512	0.611329
61-82-5	Amitrole	Herbicide	Triazole	0.0177	39.1609	0.107152	-0.97	2.2321e-08	9.00469e-12	0.973525								0.881121	0.797768	0.967593	0.825091	0.985062	1.06343e+08	0.375305	0.908167	0.913599	0.84371		8255.65	247.675	1.04458	2488.55	1184.21	20.1998	60.307	545.44	5.09358e-07	113.114	141.093	256.404	7.49219	71.6228	1176.25	2.92719	622.149	8255.65	1184.21	545.44	141.093
6190-65-4	DESETHYLATRAZINE	Metabolite	Other pesticide class	0.0341	20.3269	32.3594	1.51	0.000729412	2.94258e-07	0.999873								2.15782	2.20353	1.96797	2.35757	1.75599	8149.77	27.7811	1.8887	5.96565	2.78196		3371.1	128.558	0.378182	2488.55	582.242	7.06944	60.307	305.976	0.0066464	113.114	1.90608	256.404	3.60258	71.6228	180.135	0.887753	622.149	3371.1	582.242	305.976	1.90608
62-38-4	PHENYLMERCURIC ACETATE	Herbicide, Fungicide, Bacteriocide	Other pesticide class	0.0231	30.0064	5.12861	0.71	5.7166e-05	2.30618e-08	0.999396								1.14381	1.06035	1.17343	1.06369	1.14369	51248	6.0143	1.10992	1.95311	1.50093		6359.62	189.777	0.785906	2488.55	976.483	15.6688	60.307	469.789	0.00105695	113.114	8.80451	256.404	6.13032	71.6228	550.211	1.64544	622.149	6359.62	976.483	469.789	8.80451
62476-59-9	ACIFLUORFEN-SODIUM	Herbicide	Other pesticide class	1.93	0.359144	2.34423	0.37	1.99498e-09	8.04811e-13	0.998723								1.00213	0.917187	1.06241	0.931387	1.05813	1.31398e+09	2.9729	1.0011	1.39245	1.1766		7258.76	2.27142	0.908575	2488.55	1078.52	17.8945	60.307	507.773	4.12234e-08	113.114	17.8118	256.404	6.79666	71.6228	771.75	2.09902	622.149	7258.76	1078.52	507.773	17.8118
62-53-3	aniline	Metabolite	Other pesticide class	0.0326	21.2622	7.94328	0.9	0.20402	8.23053e-05	0.999597								1.27787	1.19924	1.27847	1.19743	1.22464	15.887	8.89203	1.21288	2.4836	1.75801		5692.45	134.474	0.694883	2488.55	896.252	13.9187	60.307	438.735	3.40949	113.114	5.9551	256.404	5.60993	71.6228	432.688	1.40483	622.149	5692.45	896.252	438.735	5.9551
62-56-6	Thiourea	Rodenticide, Insecticide, Acaricide	Other pesticide class	0.00219	316.506	0.0831764	-1.08	0.00019998	8.06755e-08	0.966162								0.879788	0.796467	0.966548	0.823952	0.984256	11856.3	0.346676	0.907143	0.908322	0.839696		8268.17	2001.75	1.04629	2488.55	1185.49	20.2277	60.307	545.886	0.00456859	113.114	152.745	256.404	7.50065	71.6228	1183.08	2.94118	622.149	8268.17	1185.49	545.886	152.745
62-73-7	DICHLORVOS	Insecticide, Acaricide, Metabolite	Organophosphate	0.11	6.30134	26.9153	1.43	0.057974	2.33877e-05	0.999855								1.99658	2.00647	1.84163	2.09889	1.65863	92.1412	24.3199	1.76486	5.32761	2.65011		3643.34	39.8531	0.415324	2488.55	622.186	7.9407	60.307	323.938	0.587866	113.114	2.17735	256.404	3.85536	71.6228	201.708	0.931922	622.149	3643.34	622.186	323.938	2.17735
62-75-9	N-Nitrosodimethylamine	Insecticide, Nematicide, Other product consitutent	Other pesticide class	0.0144	48.1352	0.269153	-0.57	0.18382	7.41563e-05	0.989268								0.890112	0.806553	0.974638	0.832789	0.990491	13.0107	0.568305	0.915073	0.949178	0.870556		8172.26	304.433	1.0332	2488.55	1175.65	20.0131	60.307	542.45	4.16325	113.114	93.1769	256.404	7.43566	71.6228	1132.16	2.83692	622.149	8172.26	1175.65	542.45	93.1769
62924-70-3	FLUMETRALIN	Plant growth regulator	Other pesticide class	0.856	0.809751	281838	5.45	0.1919	7.74159e-05	0.996845								5.30992	7.92418	4.43783	13392.5	3.65937	162619	95.4442	4.30956	18.4389	3.86936		1369.93	5.12131	0.105163	2488.55	258.197	0.00124448	60.307	146.826	0.00033309	113.114	0.554805	256.404	1.57885	71.6228	58.2802	0.63827	622.149	1369.93	258.197	146.826	0.554805
630-20-6	1,1,1,2-Tetrachloroethane	Other product constituent	Other pesticide class	1.27	0.545785	851.138	2.93	252.5	0.101863	0.99995								4.932	6.97437	4.1417	41.2621	3.43116	0.382562	87.3316	4.0193	16.9434	3.80655		1474.91	3.45184	0.119485	2488.55	276.658	0.403922	60.307	156.592	141.589	113.114	0.606343	256.404	1.69287	71.6228	63.4243	0.648802	622.149	1474.91	276.658	156.592	0.606343
631-61-8	Acetic acid, ammonium salt	Fungicide, Insecticide, Attractant	Other pesticide class	0.0045	154.033	0.00162181	-2.79	1.34633e-06	5.43134e-10	0.357868								0.875245	0.792035	0.962988	0.820077	0.981513	1.7544e+06	0.24916	0.903654	0.890345	0.825962		8311.08	974.187	1.05214	2488.55	1189.87	20.3233	60.307	547.412	3.08748e-05	113.114	212.526	256.404	7.52961	71.6228	1206.97	2.99008	622.149	8311.08	1189.87	547.412	212.526
63-25-2	Carbaryl	Insecticide, Plant growth regulator	Carbamate	0.191	3.62904	229.087	2.36	0.00033027	1.33237e-07	0.999948								4.16777	5.32884	3.54288	11.7051	2.96969	83948	70.9268	3.43237	13.9192	3.64792		1745.35	22.952	0.156382	2488.55	323.418	1.42388	60.307	180.925	0.00064524	113.114	0.746586	256.404	1.98235	71.6228	77.204	0.677014	622.149	1745.35	323.418	180.925	0.746586
63284-71-9	5-PYRIMIDINEMETHANOL, ,ALPHA,-(2-CHLOROPHENYL)-,	Fungicide	Other pesticide class	11.6	0.0597541	1513.56	3.18	9.92673e-06	4.00462e-09	0.999944								5.08966	7.35824	4.26524	72.7374	3.52636	1.71192e+07	90.716	4.14039	17.5673	3.8338		1429.22	0.377917	0.113252	2488.55	268.645	0.229135	60.307	152.364	3.16408e-06	113.114	0.583722	256.404	1.64336	71.6228	61.1718	0.64419	622.149	1429.22	268.645	152.364	0.583722
639-58-7	TRIPHENYLTIN CHLORIDE	Fungicide, Algicide, Molluscicide	Other pesticide class	0.462	1.50032	15488.2	4.19	0.296049	0.000119431	0.999791								5.28851	7.86756	4.42105	736.745	3.64643	5800.26	94.9845	4.29311	18.3541	3.86602		1375.48	9.48883	0.10592	2488.55	259.177	0.022622	60.307	147.347	0.00933866	113.114	0.55749	256.404	1.5849	71.6228	58.5493	0.638821	622.149	1375.48	259.177	147.347	0.55749
640-15-3	THIOMETON	Insecticide, Acaricide	Organophosphate	0.638	1.08644	1412.54	3.15	0.0027876	1.12457e-06	0.999945								5.07466	7.32099	4.25349	67.9372	3.51731	56949.8	90.3941	4.12887	17.5079	3.83127		1433.44	6.87122	0.113828	2488.55	269.387	0.245325	60.307	152.757	0.000951131	113.114	0.585801	256.404	1.64795	71.6228	61.3792	0.644615	622.149	1433.44	269.387	152.757	0.585801
64-17-5	Ethanol	Other product constituent, Plant growth regulator precursor, Additive, Insecticide, Preservative	Other pesticide class	0.0287	24.1515	0.489779	-0.31	0.505	0.000203726	0.994057								0.902298	0.818481	0.984186	0.843272	0.997849	4.78425	0.829889	0.924432	0.997399	0.90636		8061.89	152.747	1.01815	2488.55	1164.24	19.7643	60.307	538.45	11.3219	113.114	63.8072	256.404	7.36038	71.6228	1077.42	2.72485	622.149	8061.89	1164.24	538.45	63.8072
64-18-6	Formic acid	Insecticide, Metabolite	Other pesticide class	0.0362	19.1477	0.288403	-0.54	0.016867	6.80445e-06	0.989975								0.891178	0.807595	0.975473	0.833704	0.991134	141.919	0.591186	0.915891	0.953395	0.873715		8162.49	121.101	1.03187	2488.55	1174.64	19.9911	60.307	542.098	0.381673	113.114	89.5707	256.404	7.42901	71.6228	1127.15	2.82666	622.149	8162.49	1174.64	542.098	89.5707
64-19-7	ACETIC ACID	Herbicide, Metabolite	Other pesticide class	0.0762	9.09642	0.676083	-0.17	0.0101	4.07452e-06	0.995678								0.912536	0.828523	0.992208	0.852124	1.00403	241.255	1.04966	0.932295	1.03791	0.935935		7971.44	57.5307	1.00581	2488.55	1154.83	19.559	60.307	535.134	0.224521	113.114	50.4477	256.404	7.2983	71.6228	1035.37	2.63875	622.149	7971.44	1154.83	535.134	50.4477
64628-44-0	Triflumuron	Insecticide, Veterinary treatment	Benzoylurea	1.05	0.66014	81283.1	4.91	0.00057166	2.30618e-07	0.999062								5.30684	7.916	4.43541	3863.01	3.6575	1.57467e+07	95.378	4.30719	18.4267	3.86888		1370.73	4.17509	0.105272	2488.55	258.338	0.00431442	60.307	146.901	3.43988e-06	113.114	0.55519	256.404	1.57972	71.6228	58.3188	0.638349	622.149	1370.73	258.338	146.901	0.55519
64700-56-7	TRICLOPYR ESTER	Herbicide	Other pesticide class	0.43	1.61197	10232.9	4.01	3.76612e-08	1.51932e-11	0.999849								5.27696	7.83716	4.412	487.041	3.63946	3.01455e+10	94.7365	4.28424	18.3084	3.86421		1378.49	10.195	0.106331	2488.55	259.709	0.0342203	60.307	147.63	1.79684e-09	113.114	0.558949	256.404	1.58819	71.6228	58.6955	0.63912	622.149	1378.49	259.709	147.63	0.558949
6485-55-8	cis-2,6-dimethylmorpholine	Metabolite	Other pesticide class	0.221	3.13641	1.90546	0.28	0.116453	4.6979e-05	0.998438								0.978921	0.894081	1.04422	0.910539	1.04412	22.093	2.47467	0.983279	1.3006	1.11721		7430.87	19.8364	0.932055	2488.55	1097.31	18.3042	60.307	514.589	2.45176	113.114	21.3979	256.404	6.91987	71.6228	826.249	2.2106	622.149	7430.87	1097.31	514.589	21.3979
64902-72-3	CHLORSULFURON	Herbicide	Other pesticide class	0.015	46.2098	100	2	3.4542e-11	1.39349e-14	0.999933								3.34574	3.87802	2.89877	5.57153	2.47331	3.88903e+11	53.281	2.80104	10.6664	3.40545		2174.17	292.256	0.214886	2488.55	395.282	2.9914	60.307	217.236	1.39281e-10	113.114	0.993842	256.404	2.42916	71.6228	100.748	0.725219	622.149	2174.17	395.282	217.236	0.993842
650-51-1	SODIUM TRICHLOROACETATE	Herbicide	Other pesticide class	0.151	4.59038	0.0042658	-2.37	6.42616e-10	2.59243e-13	0.594457								0.875392	0.792178	0.963104	0.820203	0.981602	3.67605e+09	0.252325	0.903767	0.890929	0.82641		8309.68	29.0321	1.05195	2488.55	1189.73	20.3202	60.307	547.362	1.4735e-08	113.114	209.86	256.404	7.52867	71.6228	1206.18	2.98847	622.149	8309.68	1189.73	547.362	209.86
6515-38-4	3,5,6-TRICHLORO-2-PYRIDINOL	Metabolite	Other pesticide class	0.0924	7.50159	1621.81	3.21	0.337074	0.000135982	0.999943								5.10375	7.39339	4.27628	77.8808	3.53487	539.713	91.0186	4.15122	17.623	3.83616		1425.27	47.4442	0.112713	2488.55	267.951	0.214002	60.307	151.997	0.100362	113.114	0.581781	256.404	1.63908	71.6228	60.9782	0.643794	622.149	1425.27	267.951	151.997	0.581781
65195-55-3	AVERMECTIN B1A	Insecticide, Acaricide, Nematicide, Metabolite, Veterinary treatment	Other pesticide class	22.7	0.0305351	30199.5	4.48	4.86178e-22	1.96133e-25	0.999628								5.29952	7.89663	4.42968	1435.76	3.65309	6.88215e+24	95.2209	4.30157	18.3977	3.86774		1372.62	0.193121	0.10553	2488.55	258.672	0.0116083	60.307	147.079	7.8706e-24	113.114	0.556106	256.404	1.58179	71.6228	58.4106	0.638537	622.149	1372.62	258.672	147.079	0.556106
65-85-0	benzoic acid	Insecticide, Fungicide, Antimicrobial agent	Other pesticide class	0.106	6.53912	74.131	1.87	0.0038481	1.55239e-06	0.999923								3.01491	3.36789	2.63955	4.34236	2.27354	2746.64	46.1793	2.54695	9.35724	3.27512		2412.75	41.357	0.247435	2488.55	434.102	3.83816	60.307	236.324	0.0197211	113.114	1.14668	256.404	2.67149	71.6228	114.844	0.754078	622.149	2412.75	434.102	236.324	1.14668
66063-05-6	PENCYCURON	Fungicide	Other pesticide class	0.167	4.15058	66069.3	4.82	4.9793e-07	2.00874e-10	0.99923								5.30584	7.91336	4.43463	3140.13	3.6569	1.46955e+10	95.3566	4.30642	18.4227	3.86873		1370.99	26.2505	0.105307	2488.55	258.383	0.00530764	60.307	146.925	3.68593e-09	113.114	0.555315	256.404	1.58	71.6228	58.3313	0.638375	622.149	1370.99	258.383	146.925	0.555315
66215-27-8	Cyromazine	Insecticide, Veterinary treatment	Other pesticide class	0.00455	152.34	9.12011	0.96	5.7065e-09	2.3021e-12	0.999644								1.3314	1.25566	1.32041	1.25334	1.25696	5.90829e+08	10.0411	1.25399	2.69541	1.84967		5463.59	963.481	0.66366	2488.55	867.783	13.2977	60.307	427.453	9.16791e-08	113.114	5.27364	256.404	5.42601	71.6228	398.685	1.33521	622.149	5463.59	867.783	427.453	5.27364
66230-04-4	ESFENVALERATE	Insecticide	Pyrethroid	1.34	0.517274	1.65959e+06	6.22	0.0034845	1.40571e-06	0.981876								5.31096	7.92694	4.43864	78856.6	3.65999	5.27324e+07	95.4665	4.31036	18.443	3.86952		1369.66	3.27152	0.105127	2488.55	258.15	0.000211354	60.307	146.801	1.0272e-06	113.114	0.554675	256.404	1.57856	71.6228	58.2672	0.638244	622.149	1369.66	258.15	146.801	0.554675
66246-88-6	Penconazole	Fungicide	Triazole	15.3	0.0453037	46773.5	4.67	0.0014342	5.78582e-07	0.999444								5.30364	7.90754	4.43291	2223.28	3.65557	3.61244e+06	95.3094	4.30473	18.414	3.86838		1371.55	0.286525	0.105385	2488.55	258.483	0.00749644	60.307	146.979	1.49945e-05	113.114	0.555589	256.404	1.58062	71.6228	58.3589	0.638431	622.149	1371.55	258.483	146.979	0.555589
66332-96-5	Flutolanil	Fungicide	Other pesticide class	2.09	0.331649	5011.87	3.7	0.00032118	1.2957e-07	0.999907								5.24186	7.74545	4.3845	238.961	3.61827	1.73504e+06	93.9832	4.25729	18.1695	3.85867		1387.72	2.09753	0.10759	2488.55	261.337	0.0697465	60.307	148.494	3.12193e-05	113.114	0.563429	256.404	1.59824	71.6228	59.1441	0.640039	622.149	1387.72	261.337	148.494	0.563429
66441-23-4	Fenoxaprop ethyl	Herbicide	Other pesticide class	0.401	1.72855	38018.9	4.58	0.0016059	6.47849e-07	0.999541								5.30191	7.90296	4.43155	1807.3	3.65453	2.62263e+06	95.2723	4.30341	18.4072	3.86811		1372	10.9323	0.105446	2488.55	258.563	0.00922185	60.307	147.021	2.06535e-05	113.114	0.555806	256.404	1.58111	71.6228	58.3806	0.638476	622.149	1372	258.563	147.021	0.555806
66-81-9	CYCLOHEXIMIDE	Fungicide, Plant Growth Regulator	Other pesticide class	0.0268	25.8637	3.54813	0.55	7.94925e-13	3.20687e-16	0.999144								1.06456	0.979812	1.11133	0.988591	1.09583	3.4653e+12	4.31294	1.04905	1.63947	1.32712		6833.11	163.576	0.850503	2488.55	1031.05	16.859	60.307	490.307	1.56312e-11	113.114	12.2777	256.404	6.48603	71.6228	655.467	1.86094	622.149	6833.11	1031.05	490.307	12.2777
66841-25-6	TRALOMETHRIN	Insecticide	Pyrethroid	0.502	1.38077	3.63078e+07	7.56	3.9794e-05	1.60536e-08	0.712731								5.31117	7.92748	4.4388	1.72518e+06	3.66012	1.01017e+11	95.4709	4.31051	18.4438	3.86955		1369.61	8.73275	0.10512	2488.55	258.14	9.66084e-06	60.307	146.796	5.36212e-10	113.114	0.55465	256.404	1.57851	71.6228	58.2647	0.638238	622.149	1369.61	258.14	146.796	0.55465
67129-08-2	Metazachlor	Herbicide	Other pesticide class	0.373	1.8583	134.896	2.13	5.7267e-05	2.31025e-08	0.99994								3.66557	4.40904	3.14938	7.22964	2.66643	302043	60.1464	3.04667	11.932	3.51138		1984.48	11.7529	0.189005	2488.55	363.829	2.30532	60.307	201.502	0.000179335	113.114	0.8804	256.404	2.23331	71.6228	90.0624	0.70334	622.149	1984.48	363.829	201.502	0.8804
67375-30-8	alpha-Cypermethrin	Insecticide, Veterinary treatment	Pyrethroid	2.32	0.29877	1.14815e+06	6.06	0.04242	1.7113e-05	0.98738								5.31087	7.92669	4.43857	54555.7	3.65994	2.99675e+06	95.4645	4.31028	18.4426	3.86951		1369.69	1.88959	0.10513	2488.55	258.154	0.000305498	60.307	146.804	1.80752e-05	113.114	0.554687	256.404	1.57859	71.6228	58.2684	0.638246	622.149	1369.69	258.154	146.804	0.554687
67-48-1	Choline chloride	Plant growth regulator	Other pesticide class	0.00175	396.084	6.91831e-06	-5.16	9.17835e-12	3.70271e-15	0.00237179								0.875155	0.791947	0.962917	0.82	0.981459	2.57325e+11	0.247227	0.903585	0.889989	0.825689		8311.94	2505.05	1.05226	2488.55	1189.96	20.3252	60.307	547.442	2.10499e-10	113.114	214.187	256.404	7.53019	71.6228	1207.45	2.99107	622.149	8311.94	1189.96	547.442	214.187
67485-29-4	HYDRAMETHYLNON	Insecticide	Other pesticide class	17.3	0.0400663	3.23594e+08	8.51	0.2222	8.96395e-05	0.217774								5.31117	7.9275	4.43881	1.53757e+07	3.66012	1.61238e+08	95.4711	4.31052	18.4438	3.86955		1369.61	0.253401	0.105119	2488.55	258.14	1.08396e-06	60.307	146.796	3.35941e-07	113.114	0.554649	256.404	1.5785	71.6228	58.2646	0.638238	622.149	1369.61	258.14	146.796	0.554649
67564-91-4	Fenpropimorph	Fungicide	Morpholine	1.25	0.554518	85113.8	4.93	0.24644	9.94183e-05	0.999019								5.30703	7.91652	4.43556	4045.03	3.65762	38248.1	95.3822	4.30734	18.4274	3.86891		1370.68	3.50707	0.105265	2488.55	258.329	0.00412028	60.307	146.896	0.00141619	113.114	0.555166	256.404	1.57967	71.6228	58.3164	0.638344	622.149	1370.68	258.329	146.896	0.555166
67747-09-5	PROCHLORAZ	Fungicide	Imidazole	70.8	0.00979021	12589.3	4.1	0.0016564	6.68221e-07	0.999823								5.28332	7.8539	4.41698	599.003	3.6433	842913	94.8731	4.28913	18.3336	3.86521		1376.83	0.0619186	0.106104	2488.55	259.415	0.027824	60.307	147.474	6.42613e-05	113.114	0.558144	256.404	1.58638	71.6228	58.6149	0.638955	622.149	1376.83	259.415	147.474	0.558144
68085-85-8	CYHALOTHRIN	Insecticide	Pyrethroid	3.77	0.183859	6.30957e+06	6.8	0.14948	6.03029e-05	0.934516								5.31112	7.92735	4.43877	299802	3.66009	4.67338e+06	95.4699	4.31048	18.4436	3.86955		1369.62	1.16282	0.105121	2488.55	258.142	5.55922e-05	60.307	146.797	1.15905e-05	113.114	0.554655	256.404	1.57852	71.6228	58.2653	0.63824	622.149	1369.62	258.142	146.797	0.554655
68359-37-5	CYFLUTHRIN	Insecticide	Pyrethroid	1.06	0.653912	891251	5.95	0.002929	1.18161e-06	0.990168								5.31078	7.92645	4.4385	42348.9	3.65988	3.36902e+07	95.4626	4.31022	18.4423	3.86949		1369.71	4.1357	0.105133	2488.55	258.158	0.000393556	60.307	146.806	1.60779e-06	113.114	0.554698	256.404	1.57861	71.6228	58.2695	0.638248	622.149	1369.71	258.158	146.806	0.554698
6923-22-4	AZODRIN	Insecticide, Acaricide	Organophosphate	0.00513	135.116	0.630957	-0.2	6.565e-08	2.64844e-11	0.995373								0.910061	0.826093	0.990268	0.84998	1.00254	3.704e+07	0.996521	0.930393	1.02812	0.928826		7993.13	854.55	1.00876	2488.55	1157.09	19.6083	60.307	535.932	1.46238e-06	113.114	53.1377	256.404	7.31322	71.6228	1045.23	2.65894	622.149	7993.13	1157.09	535.932	53.1377
69327-76-0	Buprofezin	Insecticide, Acaricide	Other pesticide class	0.0758	9.14442	19952.6	4.3	0.4242	0.00017113	0.999742								5.29356	7.88088	4.42501	948.875	3.64949	5213.22	95.0929	4.29699	18.3741	3.86681		1374.17	57.8343	0.105741	2488.55	258.945	0.0175647	60.307	147.224	0.0103903	113.114	0.556854	256.404	1.58347	71.6228	58.4856	0.638691	622.149	1374.17	258.945	147.224	0.556854
69377-81-7	Fluroxypyr	Herbicide	Other pesticide class	0.134	5.17274	14.7911	1.17	1.0605e-08	4.27825e-12	0.999766								1.57062	1.5148	1.50786	1.5228	1.40141	3.77127e+08	15.1762	1.43772	3.64204	2.1991		4631.43	32.7152	0.550129	2488.55	759.907	10.9447	60.307	383.393	1.4363e-07	113.114	3.48921	256.404	4.73262	71.6228	295.06	1.12305	622.149	4631.43	759.907	383.393	3.48921
69409-94-5	FLUVALINATE	Insecticide, Acaricide	Pyrethroid	1.88	0.368695	6.45654e+06	6.81	0.270906	0.000109288	0.933093								5.31112	7.92736	4.43877	306786	3.66009	2.63873e+06	95.4699	4.31048	18.4436	3.86955		1369.62	2.33183	0.105121	2488.55	258.142	5.43268e-05	60.307	146.797	2.05275e-05	113.114	0.554655	256.404	1.57852	71.6228	58.2652	0.638239	622.149	1369.62	258.142	146.797	0.554655
69581-33-5	Cyprofuram	Fungicide	Other pesticide class	0.0148	46.8343	14.4544	1.16	2.24824e-05	9.06979e-09	0.999762								1.55723	1.49998	1.49736	1.50681	1.39332	176234	14.8886	1.42743	3.58903	2.18176		4671.27	296.205	0.555564	2488.55	765.234	11.0609	60.307	385.619	0.000307356	113.114	3.5566	256.404	4.76673	71.6228	299.419	1.13197	622.149	4671.27	765.234	385.619	3.5566
69806-50-4	FLUAZIFOP - BUTYL	Herbicide	Other pesticide class	0.35	1.98042	31622.8	4.5	0.021008	8.475e-06	0.999612								5.30004	7.89802	4.43009	1503.39	3.6534	166771	95.2321	4.30197	18.3998	3.86782		1372.48	12.5253	0.105512	2488.55	258.648	0.0110861	60.307	147.066	0.000324796	113.114	0.55604	256.404	1.58164	71.6228	58.4041	0.638524	622.149	1372.48	258.648	147.066	0.55604
6988-21-2	DIOXACARB	Insecticide	Carbamate	0.00769	90.1362	4.67735	0.67	1.4847e-06	5.98955e-10	0.999341								1.12149	1.03754	1.15593	1.04225	1.13021	1.93957e+06	5.53503	1.09277	1.86476	1.45378		6486.23	570.07	0.803179	2488.55	991.261	15.9911	60.307	475.393	2.79272e-05	113.114	9.56686	256.404	6.22651	71.6228	576.279	1.69881	622.149	6486.23	991.261	475.393	9.56686
70124-77-5	FLUCYTHRINATE	Insecticide, Acaricide	Pyrethroid	0.899	0.77102	1.58489e+06	6.2	0.0086961	3.50816e-06	0.982676								5.31095	7.92691	4.43863	75307.5	3.65999	2.01787e+07	95.4663	4.31035	18.4429	3.86952		1369.67	4.87635	0.105127	2488.55	258.15	0.000221315	60.307	146.801	2.68434e-06	113.114	0.554676	256.404	1.57857	71.6228	58.2673	0.638244	622.149	1369.67	258.15	146.801	0.554676
70-30-4	Hexachloroprene	Fungicide, Microbiocide	Other pesticide class	3.78	0.183372	3.46737e+07	7.54	3.2204e-08	1.29917e-11	0.722066								5.31117	7.92748	4.4388	1.64753e+06	3.66012	1.19207e+14	95.4709	4.31051	18.4438	3.86955		1369.61	1.15975	0.10512	2488.55	258.14	1.01161e-05	60.307	146.796	4.54391e-13	113.114	0.55465	256.404	1.57851	71.6228	58.2647	0.638238	622.149	1369.61	258.14	146.796	0.55465
70-38-2	DIMETHRIN	Insecticide, Miticide	Pyrethroid	1.03	0.672958	3.71535e+06	6.57	119.776	0.0483198	0.960359								5.31108	7.92725	4.43873	176537	3.66007	3434.35	95.4691	4.31045	18.4434	3.86954		1369.63	4.25616	0.105123	2488.55	258.144	9.44089e-05	60.307	146.798	0.015772	113.114	0.55466	256.404	1.57853	71.6228	58.2658	0.638241	622.149	1369.63	258.144	146.798	0.55466
70630-17-0	Metalaxyl-M	Fungicide	Other pesticide class	0.0103	67.2958	51.2861	1.71	0.00029795	1.20198e-07	0.999906								2.61398	2.79714	2.32539	3.25688	2.03144	26984.5	37.5729	2.23903	7.7707	3.0791		2782.82	425.616	0.297924	2488.55	492.749	5.11738	60.307	264.489	0.00200732	113.114	1.40934	256.404	3.03889	71.6228	138.291	0.802084	622.149	2782.82	492.749	264.489	1.40934
7085-19-0	mecoprop	Herbicide	Other pesticide class	1.26	0.550117	1584.89	3.2	9.0496e-05	3.65077e-08	0.999944								5.09915	7.3819	4.27268	76.1267	3.53209	1.96512e+06	90.9198	4.14768	17.6048	3.83539		1426.56	3.47924	0.112889	2488.55	268.177	0.218933	60.307	152.117	2.7564e-05	113.114	0.582413	256.404	1.64047	71.6228	61.0413	0.643923	622.149	1426.56	268.177	152.117	0.582413
709-98-8	PROPANIL	Herbicide	Other pesticide class	0.445	1.55763	1174.9	3.07	0.00017271	6.96743e-08	0.999948								5.02986	7.21064	4.21838	56.6456	3.49025	766849	89.4323	4.09446	17.3306	3.82365		1446.21	9.85133	0.11557	2488.55	271.629	0.294227	60.307	153.941	7.06354e-05	113.114	0.5921	256.404	1.6618	71.6228	62.0071	0.645901	622.149	1446.21	271.629	153.941	0.5921
71283-80-2	Fenoxaprop-P-ethyl	Herbicide	Other pesticide class	0.401	1.72855	38018.9	4.58	0.0016059	6.47849e-07	0.999541								5.30191	7.90296	4.43155	1807.3	3.65453	2.62263e+06	95.2723	4.30341	18.4072	3.86811		1372	10.9323	0.105446	2488.55	258.563	0.00922185	60.307	147.021	2.06535e-05	113.114	0.555806	256.404	1.58111	71.6228	58.3806	0.638476	622.149	1372	258.563	147.021	0.555806
71-36-3	1-Butanol	Other product constituent	Other pesticide class	0.0682	10.1634	7.58578	0.88	0.88981	0.000358965	0.99958								1.26133	1.18191	1.26551	1.18044	1.21465	3.59817	8.53682	1.20017	2.41811	1.72849		5767.13	64.2792	0.705072	2488.55	905.434	14.119	60.307	442.344	15.0539	113.114	6.20289	256.404	5.66933	71.6228	444.405	1.42882	622.149	5767.13	905.434	442.344	6.20289
71-55-6	1,1,1-Trichloroethane	Other product constituent	Other pesticide class	0.822	0.843245	309.03	2.49	1737.2	0.700818	0.99995								4.403	5.80072	3.7272	15.5036	3.11173	0.0210549	75.9762	3.61303	14.8501	3.7021		1652.11	5.33314	0.14366	2488.55	307.425	1.07502	60.307	172.667	2572.64	113.114	0.696967	256.404	1.88323	71.6228	72.3646	0.667106	622.149	1652.11	307.425	172.667	0.696967
71561-11-0	Pyrazoxyfen	Herbicide	Other pesticide class	0.835	0.830116	4897.79	3.69	2.1412e-05	8.63798e-09	0.999908								5.24027	7.74132	4.38325	233.54	3.61731	2.54357e+07	93.9491	4.25607	18.1633	3.85841		1388.14	5.25011	0.107647	2488.55	261.412	0.0713654	60.307	148.534	2.12956e-06	113.114	0.563634	256.404	1.5987	71.6228	59.1646	0.640081	622.149	1388.14	261.412	148.534	0.563634
7173-51-5	Didecyldimethylammonium Chloride	Fungicide, Bactericide, Herbicide, Algaecide, Antiseptic, Other product constituent	Other pesticide class	2.82	0.245797	45708.8	4.66	2.0434e-06	8.24345e-10	0.999456								5.30347	7.90708	4.43277	2172.69	3.65547	2.47777e+09	95.3056	4.3046	18.4133	3.86836		1371.6	1.55455	0.105391	2488.55	258.491	0.00767098	60.307	146.983	2.1861e-08	113.114	0.555611	256.404	1.58067	71.6228	58.3611	0.638436	622.149	1371.6	258.491	146.983	0.555611
7212-44-4	Nerolidol	Insecticide, Insect attractant, Pheromone, Parapheromone	Botanical insecticide	8.14	0.0851532	478630	5.68	11.4572	0.00462203	0.994679								5.31044	7.92555	4.43823	22743.1	3.65968	4625.45	95.4553	4.30995	18.4409	3.86944		1369.8	0.538555	0.105145	2488.55	258.173	0.000732823	60.307	146.814	0.0117106	113.114	0.55474	256.404	1.57871	71.6228	58.2738	0.638257	622.149	1369.8	258.173	146.814	0.55474
72178-02-0	FOMESAFEN	Herbicide	Organochlorine	1.39	0.498667	794.328	2.9	0.00087752	3.54007e-07	0.999951								4.90735	6.91587	4.12238	38.5628	3.41627	102912	86.8025	4.00037	16.8458	3.80214		1482.31	3.15384	0.120496	2488.55	277.954	0.432196	60.307	157.274	0.000526341	113.114	0.610039	256.404	1.70088	71.6228	63.7916	0.649554	622.149	1482.31	277.954	157.274	0.610039
72-20-8	ENDRIN	Insecticide, Avicide, Rodenticide	Organochlorine	103	0.00672958	158489	5.2	1.01	0.000407452	0.998207								5.30895	7.9216	4.43707	7531.49	3.65878	17376	95.4233	4.30881	18.435	3.86921		1370.18	0.0425616	0.105198	2488.55	258.241	0.00221293	60.307	146.85	0.00311733	113.114	0.554926	256.404	1.57913	71.6228	58.2924	0.638295	622.149	1370.18	258.241	146.85	0.554926
72-43-5	Methoxychlor	Insecticide	Organochlorine	18.4	0.037671	120226	5.08	0.020503	8.27128e-06	0.99863								5.30824	7.91972	4.43651	5713.42	3.65835	649340	95.4081	4.30827	18.4322	3.8691		1370.37	0.238252	0.105223	2488.55	258.274	0.00291711	60.307	146.867	8.3418e-05	113.114	0.555015	256.404	1.57933	71.6228	58.3013	0.638313	622.149	1370.37	258.274	146.867	0.555015
72-54-8	DDD	Insecticide, Metabolite	Organochlorine	58.8	0.0117882	1.04713e+06	6.02	0.6666	0.000268918	0.988474								5.31084	7.92661	4.43854	49755.5	3.65992	173923	95.4639	4.31026	18.4425	3.8695		1369.7	0.0745551	0.105131	2488.55	258.155	0.000334971	60.307	146.804	0.000311441	113.114	0.554691	256.404	1.5786	71.6228	58.2688	0.638247	622.149	1369.7	258.155	146.804	0.554691
72-55-9	p,p'-DDE	Metabolite	Organochlorine	252	0.00275058	3.23594e+06	6.51	4.2016	0.001695	0.965292								5.31107	7.92721	4.43872	153757	3.66006	85270.9	95.4687	4.31044	18.4434	3.86954		1369.64	0.0173962	0.105123	2488.55	258.145	0.000108396	60.307	146.799	0.00063523	113.114	0.554662	256.404	1.57853	71.6228	58.2659	0.638241	622.149	1369.64	258.145	146.799	0.554662
7287-19-6	PROMETRYNE	Herbicide	Other pesticide class	0.15	4.62098	3235.94	3.51	0.0012019	4.84868e-07	0.999926								5.20474	7.64943	4.35541	154.577	3.59585	300053	93.1863	4.22877	18.0226	3.85273		1397.62	29.2256	0.108941	2488.55	263.083	0.107821	60.307	149.42	0.000180524	113.114	0.568248	256.404	1.60902	71.6228	59.6262	0.641026	622.149	1397.62	263.083	149.42	0.568248
7292-16-2	PROPAPHOS	Insecticide	Organophosphate	0.476	1.45619	4677.35	3.67	0.00029088	1.17346e-07	0.999911								5.23699	7.73279	4.38068	223.066	3.61533	1.78844e+06	93.8786	4.25354	18.1503	3.85789		1389.01	9.20975	0.107766	2488.55	261.565	0.0747163	60.307	148.615	3.02871e-05	113.114	0.564057	256.404	1.59965	71.6228	59.2069	0.640168	622.149	1389.01	261.565	148.615	0.564057
731-27-1	TOLYFLUANIDE	Fungicide	Other pesticide class	4.89	0.141748	7943.28	3.9	0.076861	3.10071e-05	0.999875								5.26719	7.81154	4.40434	378.248	3.63356	11472.9	94.5269	4.27674	18.2698	3.86268		1381.05	0.896491	0.10668	2488.55	260.16	0.0440628	60.307	147.869	0.00472129	113.114	0.560189	256.404	1.59097	71.6228	58.8197	0.639375	622.149	1381.05	260.16	147.869	0.560189
732-11-6	PHOSMET	Insecticide, Acaricide, Veterinary treatment	Organophosphate	2.24	0.309441	602.56	2.78	0.00084638	3.41445e-07	0.999952								4.79381	6.65149	4.03342	29.4508	3.34772	81612.5	84.3654	3.91318	16.3966	3.78131		1517.42	1.95707	0.125285	2488.55	284.085	0.565915	60.307	160.495	0.000663706	113.114	0.627662	256.404	1.73878	71.6228	65.5394	0.653133	622.149	1517.42	284.085	160.495	0.627662
73250-68-7	MEFENACET	Herbicide	Other pesticide class	0.044	15.7533	1698.24	3.23	4.7571e-05	1.9191e-08	0.999943								5.11267	7.41571	4.28327	81.5126	3.54026	4.00213e+06	91.21	4.15807	17.6583	3.83765		1422.78	99.6327	0.112374	2488.55	267.514	0.204467	60.307	151.766	1.35344e-05	113.114	0.58056	256.404	1.63638	71.6228	60.8564	0.643545	622.149	1422.78	267.514	151.766	0.58056
74051-80-2	Sethoxydim	Herbicide	Other pesticide class	0.696	0.995901	23988.3	4.38	0.000279458	1.12738e-07	0.999697								5.29651	7.88868	4.42732	1140.63	3.65127	9.51222e+06	95.1563	4.29926	18.3858	3.86727		1373.4	6.29862	0.105637	2488.55	258.81	0.0146118	60.307	147.152	5.69443e-06	113.114	0.556483	256.404	1.58264	71.6228	58.4484	0.638615	622.149	1373.4	258.81	147.152	0.556483
74070-46-5	ACLONIFEN	Herbicide	Other pesticide class	0.269	2.57676	10964.8	4.04	0.0016867	6.80445e-07	0.999841								5.27922	7.84312	4.41377	521.815	3.64083	721139	94.7852	4.28598	18.3174	3.86457		1377.9	16.2968	0.10625	2488.55	259.604	0.0319398	60.307	147.574	7.51127e-05	113.114	0.558662	256.404	1.58754	71.6228	58.6668	0.639062	622.149	1377.9	259.604	147.574	0.558662
741-58-2	BENSULIDE	Herbicide	Other pesticide class	0.758	0.914442	15848.9	4.2	0.00092415	3.72819e-07	0.999787								5.28902	7.86891	4.42145	753.887	3.64674	1.90132e+06	94.9955	4.2935	18.3562	3.8661		1375.35	5.78343	0.105902	2488.55	259.153	0.0221076	60.307	147.335	2.8489e-05	113.114	0.557425	256.404	1.58476	71.6228	58.5428	0.638808	622.149	1375.35	259.153	147.335	0.557425
74222-97-2	SULFOMETURON (pH 5-7)	Herbicide	Other pesticide class	0.00163	425.244	15.8489	1.2	5.23672e-09	2.11259e-12	0.999779								1.6121	1.56092	1.54036	1.57307	1.42646	7.86095e+08	16.0665	1.46957	3.80616	2.25132		4512.27	2689.47	0.533872	2488.55	743.874	10.595	60.307	376.661	6.8906e-08	113.114	3.29585	256.404	4.63004	71.6228	282.337	1.097	622.149	4512.27	743.874	376.661	3.29585
74223-64-6	METSULFURON-METHYL	Herbicide, Metabolite	Other pesticide class	0.00192	361.014	158.489	2.2	1.3332e-11	5.37837e-15	0.999943								3.82867	4.69558	3.27717	8.35067	2.76492	1.49334e+12	63.6475	3.17193	12.5774	3.55926		1899.94	2283.25	0.177472	2488.55	349.641	1.99585	60.307	194.324	3.62722e-11	113.114	0.831971	256.404	2.14512	71.6228	85.4408	0.693878	622.149	1899.94	349.641	194.324	0.831971
74738-17-3	FENPICLONIL	Fungicide, Wood preservative	Other pesticide class	7.17	0.0966732	7244.36	3.86	0.00054439	2.19617e-07	0.999882								5.26299	7.80056	4.40105	345.038	3.63103	1.47768e+06	94.4368	4.27351	18.2531	3.86201		1382.15	0.611414	0.10683	2488.55	260.354	0.0483038	60.307	147.972	3.66566e-05	113.114	0.560723	256.404	1.59217	71.6228	58.8732	0.639484	622.149	1382.15	260.354	147.972	0.560723
74-83-9	Methyl bromide	Soil sterilant, Fumigant, Insecticide	Other pesticide class	0.127	5.45785	15.4882	1.19	741.34	0.29907	0.999775								1.59806	1.54527	1.52936	1.55593	1.41798	0.00549898	15.7651	1.45879	3.7506	2.23388		4551.92	34.5184	0.539281	2488.55	749.226	10.7117	60.307	378.913	9850.31	113.114	3.35886	256.404	4.66426	71.6228	286.52	1.10556	622.149	4551.92	749.226	378.913	3.35886
74-89-5	METHYLAMINE	Metabolite	Other pesticide class	0.0724	9.57386	0.269153	-0.57	1.1211	0.000452272	0.989268								0.890112	0.806553	0.974638	0.832789	0.990491	2.13328	0.568305	0.915073	0.949178	0.870556		8172.26	60.5503	1.0332	2488.55	1175.65	20.0131	60.307	542.45	25.3913	113.114	93.1769	256.404	7.43566	71.6228	1132.16	2.83692	622.149	8172.26	1175.65	542.45	93.1769
75-05-8	Acetonitrile	Other product constituent	Other pesticide class	0.0449	15.4376	0.457088	-0.34	3.4845	0.00140571	0.993637								0.900497	0.816716	0.982774	0.841719	0.996761	0.692331	0.79122	0.923048	0.99027	0.901109		8078.02	97.6356	1.02035	2488.55	1165.92	19.8008	60.307	539.037	78.2381	113.114	66.9256	256.404	7.37141	71.6228	1085.18	2.74073	622.149	8078.02	1165.92	539.037	66.9256
75-07-0	ACETALDEHYDE	Metabolite	Other pesticide class	0.0546	12.695	0.457088	-0.34	6.7367	0.00271771	0.993637								0.900497	0.816716	0.982774	0.841719	0.996761	0.358102	0.79122	0.923048	0.99027	0.901109		8078.02	80.2901	1.02035	2488.55	1165.92	19.8008	60.307	539.037	151.26	113.114	66.9256	256.404	7.37141	71.6228	1085.18	2.74073	622.149	8078.02	1165.92	539.037	66.9256
75-08-1	ETHYL MERCAPTAN	Rodenticide, Metabolite	Other pesticide class	0.0917	7.55886	18.6209	1.27	457.53	0.184576	0.999807								1.71654	1.6787	1.6222	1.70478	1.48953	0.00966813	18.3085	1.54978	4.21946	2.37384		4237.72	47.8063	0.496415	2488.55	706.347	9.77645	60.307	360.713	5602.6	113.114	2.89225	256.404	4.39039	71.6228	254.682	1.04038	622.149	4237.72	706.347	360.713	2.89225
75-34-3	1,1-Dichloroethane	Other product constituent	Other pesticide class	0.343	2.02084	61.6595	1.79	567.62	0.228988	0.999915								2.81211	3.07306	2.48064	3.74977	2.15108	0.0161879	41.826	2.3912	8.55474	3.18205		2586.75	12.7809	0.271174	2488.55	461.91	4.44472	60.307	249.778	3346.13	113.114	1.26603	256.404	2.84551	71.6228	125.617	0.776135	622.149	2586.75	461.91	249.778	1.26603
75-87-6	TRICHLOROACETALDEHYDE	Metabolite	Other pesticide class	0.263	2.63554	9.77237	0.99	0.00029391	1.18569e-07	0.999665								1.36046	1.28653	1.34319	1.28434	1.27451	11717.1	10.6649	1.27631	2.81041	1.89712		5346.88	16.6686	0.647737	2488.55	853.071	12.9769	60.307	421.568	0.00462286	113.114	4.96517	256.404	5.33113	71.6228	382.372	1.30181	622.149	5346.88	853.071	421.568	4.96517
75-99-0	Dalapon	Herbicide, Plant growth regulator	Organochlorine	0.242	2.86424	47.863	1.68	0.0057166	2.30618e-06	0.999902								2.54152	2.69907	2.26861	3.09423	1.98768	1340.14	36.0174	2.18338	7.48396	3.03801		2862.16	18.115	0.308748	2488.55	505.081	5.38638	60.307	270.311	0.0404186	113.114	1.4702	256.404	3.11635	71.6228	143.59	0.812932	622.149	2862.16	505.081	270.311	1.4702
759-94-4	EPTC	Herbicide	Other pesticide class	0.111	6.24457	1621.81	3.21	1.6059	0.000647849	0.999943								5.10375	7.39339	4.27628	77.8808	3.53487	113.284	91.0186	4.15122	17.623	3.83616		1425.27	39.4941	0.112713	2488.55	267.951	0.214002	60.307	151.997	0.478149	113.114	0.581781	256.404	1.63908	71.6228	60.9782	0.643794	622.149	1425.27	267.951	151.997	0.581781
76-03-9	TRICHLOROACETIC ACID	Metabolite, Herbicide	Other pesticide class	0.414	1.67427	21.3796	1.33	0.0013635	5.5006e-07	0.999827								1.81479	1.79167	1.69918	1.83586	1.54885	3468.2	20.4176	1.62524	4.60825	2.47865		4008.3	10.589	0.465115	2488.55	674.344	9.0784	60.307	346.896	0.0156181	113.114	2.5935	256.404	4.18655	71.6228	233.195	0.996389	622.149	4008.3	674.344	346.896	2.5935
76-06-2	Chloropicrin	Insecticide, Nematicide	Other pesticide class	0.294	2.35764	123.027	2.09	207.05	0.0835277	0.999938								3.56915	4.24478	3.07383	6.66566	2.60821	0.0771936	58.0767	2.97262	11.5504	3.48123		2038.08	14.911	0.196319	2488.55	372.771	2.50038	60.307	206	701.699	113.114	0.911776	256.404	2.28895	71.6228	93.0373	0.709431	622.149	2038.08	372.771	206	0.911776
76-44-8	Heptachlor	Insecticide	Organochlorine	50.1	0.0138353	1.25893e+06	6.1	29.694	0.0119791	0.986183								5.3109	7.92676	4.43859	59819.1	3.65995	4694.09	95.4651	4.3103	18.4427	3.86951		1369.68	0.0875018	0.105129	2488.55	258.153	0.000278618	60.307	146.803	0.0115393	113.114	0.554683	256.404	1.57858	71.6228	58.2681	0.638245	622.149	1369.68	258.153	146.803	0.554683
76578-14-8	QUIZALOFOP-ETHYL	Herbicide	Other pesticide class	0.148	4.68343	19054.6	4.28	0.0010706	4.31899e-07	0.999752								5.29273	7.8787	4.42436	906.206	3.64899	1.97275e+06	95.0752	4.29635	18.3708	3.86668		1374.38	29.6205	0.10577	2488.55	258.983	0.0183917	60.307	147.244	2.74575e-05	113.114	0.556958	256.404	1.58371	71.6228	58.496	0.638712	622.149	1374.38	258.983	147.244	0.556958
7664-93-9	SULFURIC ACID	Herbicide, Desiccant	Other pesticide class	0.00343	202.084	0.00630957	-2.2	7.75407e-07	3.12813e-10	0.68435								0.875506	0.792289	0.963193	0.8203	0.981671	3.04681e+06	0.254771	0.903855	0.89138	0.826755		8308.6	1278.09	1.0518	2488.55	1189.62	20.3178	60.307	547.324	1.77782e-05	113.114	207.845	256.404	7.52794	71.6228	1205.57	2.98722	622.149	8308.6	1189.62	547.324	207.845
76738-62-0	PACLOBUTRAZOL	Plant growth regulator	Triazole	2.5	0.277259	1584.89	3.2	8.3628e-06	3.3737e-09	0.999944								5.09915	7.3819	4.27268	76.1267	3.53209	2.12651e+07	90.9198	4.14768	17.6048	3.83539		1426.56	1.75354	0.112889	2488.55	268.177	0.218933	60.307	152.117	2.54721e-06	113.114	0.582413	256.404	1.64047	71.6228	61.0413	0.643923	622.149	1426.56	268.177	152.117	0.582413
7681-93-8	PIMARICIN (Natamycin)	Fungicide, Veterinary treatment	Other pesticide class	0.00685	101.189	0.000213796	-3.67	2.44646e-28	9.86945e-32	0.068441								0.875166	0.791958	0.962927	0.82001	0.981466	9.65413e+27	0.247475	0.903594	0.890035	0.825724		8311.83	639.977	1.05224	2488.55	1189.95	20.325	60.307	547.438	5.61073e-27	113.114	213.973	256.404	7.53012	71.6228	1207.39	2.99095	622.149	8311.83	1189.95	547.438	213.973
76-87-9	TRIPHENYLTIN HYDROXIDE	Fungicide	Other pesticide class	0.323	2.14597	3388.44	3.53	0.043026	1.73575e-05	0.999925								5.20942	7.66148	4.35907	161.823	3.59868	8774.19	93.2867	4.23237	18.0411	3.85348		1396.36	13.5723	0.108769	2488.55	262.862	0.102993	60.307	149.303	0.00617341	113.114	0.567636	256.404	1.60765	71.6228	59.565	0.640901	622.149	1396.36	262.862	149.303	0.567636
7696-12-0	PHTHALTHRIN	Insecticide	Other pesticide class	1.48	0.468343	53703.2	4.73	0.17069	6.88594e-05	0.999367								5.30461	7.91011	4.43367	2552.54	3.65616	34847.9	95.3302	4.30548	18.4179	3.86853		1371.3	2.96205	0.10535	2488.55	258.439	0.00652943	60.307	146.955	0.00155437	113.114	0.555468	256.404	1.58035	71.6228	58.3467	0.638406	622.149	1371.3	258.439	146.955	0.555468
7700-17-6	CROTOXYPHOS	Insecticide, Acaricide	Organophosphate	0.0168	41.2588	1995.26	3.3	0.00058479	2.35915e-07	0.99994								5.14109	7.48719	4.30554	95.6255	3.55742	381796	91.82	4.17989	17.7708	3.84235		1414.92	260.943	0.111301	2488.55	266.13	0.174291	60.307	151.034	0.000141873	113.114	0.576703	256.404	1.62783	71.6228	60.4713	0.642756	622.149	1414.92	266.13	151.034	0.576703
77-06-5	GIBBERELLIC ACID	Plant growth regulator	Other pesticide class	0.0397	17.4596	1.7378	0.24	1.23773e-12	4.99323e-16	0.998291								0.969986	0.885212	1.03722	0.902572	1.03872	2.06363e+12	2.28287	0.976417	1.26525	1.09382		7499.32	110.424	0.941394	2488.55	1104.71	18.4657	60.307	517.262	2.62482e-11	113.114	23.1958	256.404	6.96851	71.6228	849.338	2.25787	622.149	7499.32	1104.71	517.262	23.1958
77182-82-2	GLUFOSINATE-AMMONIUM	Herbicide	Other pesticide class	0.000665	1042.33	1.54882e-05	-4.81	1.76078e-13	7.1033e-17	0.00529421								0.875155	0.791947	0.962918	0.820001	0.981459	1.34135e+13	0.247237	0.903585	0.889991	0.825691		8311.93	6592.24	1.05226	2488.55	1189.96	20.3252	60.307	547.442	4.03822e-12	113.114	214.178	256.404	7.53019	71.6228	1207.45	2.99107	622.149	8311.93	1189.96	547.442	214.178
7720-78-7	SULFURIC ACID, IRON (2+) SALT (1:1)	Herbicide, Other product constituent	Other pesticide class	0.00911	76.0864	0.42658	-0.37	3.46838e-19	1.39921e-22	0.993188								0.898814	0.815068	0.981456	0.840269	0.995745	6.94574e+18	0.755104	0.921756	0.983613	0.896192		8093.14	481.212	1.02241	2488.55	1167.48	19.8349	60.307	539.587	7.79855e-18	113.114	70.1266	256.404	7.38174	71.6228	1092.52	2.75577	622.149	8093.14	1167.48	539.587	70.1266
77458-01-6	Pyraclofos	Insecticide, Nematicide, Veterinary treatment	Organophosphate	1.6	0.433217	5888.44	3.77	1.7473e-05	7.04892e-09	0.999897								5.25204	7.77196	4.39248	280.611	3.62442	3.74469e+07	94.2018	4.26511	18.2098	3.86028		1385.03	2.7399	0.107223	2488.55	260.863	0.0593942	60.307	148.242	1.44649e-06	113.114	0.562122	256.404	1.59531	71.6228	59.0133	0.639771	622.149	1385.03	260.863	148.242	0.562122
7773-06-0	Sulfamic acid, monoammonium salt	Herbicide	Other pesticide class	0.00113	613.405	4.57088e-05	-4.34	1.32976e-16	5.36448e-20	0.0154646								0.875157	0.791949	0.962919	0.820002	0.98146	1.77613e+16	0.247274	0.903587	0.889998	0.825696		8311.91	3879.5	1.05226	2488.55	1189.96	20.3251	60.307	547.441	3.0497e-15	113.114	214.147	256.404	7.53018	71.6228	1207.44	2.99105	622.149	8311.91	1189.96	547.441	214.147
77732-09-3	Oxadixyl	Fungicide	Other pesticide class	0.097	7.14585	6.30957	0.8	2.6967e-07	1.0879e-10	0.999502								1.20113	1.11932	1.21834	1.1198	1.1783	1.13487e+07	7.24469	1.15394	2.17992	1.61605		6056.14	45.1942	0.744502	2488.55	940.487	14.8836	60.307	455.989	4.77296e-06	113.114	7.3092	256.404	5.89646	71.6228	492.963	1.52823	622.149	6056.14	940.487	455.989	7.3092
77-73-6	DICYCLOPENTADIENE	Plant growth regulator, Repellent	Other pesticide class	2.41	0.287613	1445.44	3.16	778.106	0.313902	0.999945								5.07977	7.33364	4.25748	69.5005	3.52039	0.208707	90.5036	4.13279	17.5281	3.83214		1432	1.81902	0.113632	2488.55	269.134	0.239806	60.307	152.623	259.535	113.114	0.585092	256.404	1.64638	71.6228	61.3085	0.64447	622.149	1432	269.134	152.623	0.585092
7786-34-7	MEVINPHOS	Insecticide, Acaricide	Organophosphate	0.0044	157.533	1.34896	0.13	6.4539e-06	2.60362e-09	0.997811								0.949121	0.864556	1.02087	0.884096	1.02612	389094	1.83498	0.960392	1.18268	1.03801		7664.18	996.327	0.963886	2488.55	1122.4	18.8516	60.307	523.613	0.000139212	113.114	28.8574	256.404	7.08478	71.6228	908.632	2.37927	622.149	7664.18	1122.4	523.613	28.8574
77-92-9	CITRIC ACID	Fungicide, Microbiocide, Other product constituent	Botanical insecticide	0.0228	30.4012	0.0229087	-1.64	4.3733e-09	1.76427e-12	0.887262								0.876432	0.793192	0.963918	0.821089	0.98223	5.40634e+08	0.274632	0.904565	0.895041	0.829559		8299.83	192.274	1.05061	2488.55	1188.73	20.2983	60.307	547.012	1.00191e-07	113.114	192.814	256.404	7.52203	71.6228	1200.64	2.97712	622.149	8299.83	1188.73	547.012	192.814
78-34-2	DIOXATHION	Insecticide, Acaricide	Organophosphate	0.989	0.700857	2818.38	3.45	0.00345131	1.39232e-06	0.999931								5.1894	7.61007	4.34339	134.736	3.58659	91096.9	92.857	4.21699	17.9619	3.85025		1401.75	4.4326	0.109504	2488.55	263.811	0.123698	60.307	149.806	0.000594605	113.114	0.570263	256.404	1.61351	71.6228	59.8277	0.641438	622.149	1401.75	263.811	149.806	0.570263
78-48-8	DEF	Plant growth regulator, Herbicide	Organophosphate	0.725	0.956065	501187	5.7	0.029694	1.19791e-05	0.994431								5.31047	7.92563	4.43826	23814.9	3.6597	1.8688e+06	95.456	4.30998	18.441	3.86945		1369.79	6.04668	0.105144	2488.55	258.172	0.000699842	60.307	146.813	2.89848e-05	113.114	0.554736	256.404	1.5787	71.6228	58.2734	0.638256	622.149	1369.79	258.172	146.813	0.554736
78587-05-0	Hexythiazox	Acaricide	Other pesticide class	0.209	3.31649	371535	5.57	0.0023937	9.65661e-07	0.995856								5.31023	7.92498	4.43806	17654.4	3.65955	1.71857e+07	95.4507	4.30979	18.4401	3.86941		1369.85	20.9753	0.105153	2488.55	258.183	0.00094405	60.307	146.819	3.15184e-06	113.114	0.554767	256.404	1.57877	71.6228	58.2764	0.638262	622.149	1369.85	258.183	146.819	0.554767
78-59-1	Isophorone	Other product constituent	Other pesticide class	0.151	4.59038	50.1187	1.7	0.67064	0.000270548	0.999904								2.58969	2.76411	2.30636	3.20141	2.01677	11.7959	37.0516	2.22038	7.67462	3.06555		2808.91	29.0321	0.301483	2488.55	496.814	5.20604	60.307	266.412	4.592	113.114	1.42917	256.404	3.06442	71.6228	140.023	0.805629	622.149	2808.91	496.814	266.412	1.42917
786-19-6	CARBOPHENTHION	Insecticide, Acaricide	Organophosphate	9.96	0.0695931	213796	5.33	0.021715	8.76022e-06	0.997596								5.30953	7.92313	4.43752	10159.4	3.65913	1.09017e+06	95.4357	4.30925	18.4373	3.8693		1370.03	0.440145	0.105177	2488.55	258.215	0.00164051	60.307	146.836	4.96862e-05	113.114	0.554854	256.404	1.57897	71.6228	58.2852	0.63828	622.149	1370.03	258.215	146.836	0.554854
78-70-6	LINALOOL	Insecticide, Repellent, Veterinary treatment	Botanical insecticide	0.726	0.954748	933.254	2.97	2.1715	0.000876022	0.99995								4.96274	7.0479	4.16579	45.1639	3.44972	48.6708	87.9915	4.04291	17.065	3.81199		1465.77	6.03835	0.118239	2488.55	275.058	0.369026	60.307	155.749	1.11292	113.114	0.601795	256.404	1.68299	71.6228	62.9722	0.647876	622.149	1465.77	275.058	155.749	0.601795
78-87-5	1,2-dichloropropane	Insecticide, Nematicide, Fumigant	Other pesticide class	0.381	1.81928	95.4993	1.98	284.82	0.114901	0.999932								3.29521	3.79763	2.85918	5.35768	2.44279	0.0454152	52.1963	2.76223	10.4664	3.38704		2207.52	11.5061	0.219435	2488.55	400.756	3.1108	60.307	219.95	1192.7	113.114	1.0145	256.404	2.46329	71.6228	102.673	0.72916	622.149	2207.52	400.756	219.95	1.0145
79-09-4	PROPIONIC ACID	Fungicide, Bactericide, Adjuvant, Other product constituent	Other pesticide class	0.106	6.53912	2.13796	0.33	0.044945	1.81316e-05	0.998604								0.991251	0.906344	1.05389	0.921586	1.05156	57.8157	2.73935	0.992749	1.34939	1.149		7338.44	41.357	0.919445	2488.55	1087.25	18.0848	60.307	510.946	0.936885	113.114	19.3305	256.404	6.85387	71.6228	796.373	2.14943	622.149	7338.44	1087.25	510.946	19.3305
79127-80-3	FENOXYCARB	Insecticide	Carbamate	0.225	3.08065	19952.6	4.3	4.343e-05	1.75204e-08	0.999742								5.29356	7.88088	4.42501	948.875	3.64949	5.09198e+07	95.0929	4.29699	18.3741	3.86681		1374.17	19.4837	0.105741	2488.55	258.945	0.0175647	60.307	147.224	1.06376e-06	113.114	0.556854	256.404	1.58347	71.6228	58.4856	0.638691	622.149	1374.17	258.945	147.224	0.556854
79-21-0	Peracetic acid	Fungicide, Nematicide, Microbiocide	Other pesticide class	0.0152	45.6018	0.0851138	-1.07	0.21614	8.71947e-05	0.966906								0.879896	0.796572	0.966632	0.824044	0.984321	10.9709	0.34899	0.907226	0.908748	0.840021		8267.15	288.411	1.04615	2488.55	1185.39	20.2255	60.307	545.85	4.93732	113.114	151.732	256.404	7.49997	71.6228	1182.53	2.94004	622.149	8267.15	1185.39	545.85	151.732
79241-46-6	Fluazifop-P-butyl	Herbicide	Other pesticide class	0.35	1.98042	31622.8	4.5	0.021008	8.475e-06	0.999612								5.30004	7.89802	4.43009	1503.39	3.6534	166771	95.2321	4.30197	18.3998	3.86782		1372.48	12.5253	0.105512	2488.55	258.648	0.0110861	60.307	147.066	0.000324796	113.114	0.55604	256.404	1.58164	71.6228	58.4041	0.638524	622.149	1372.48	258.648	147.066	0.55604
79277-27-3	HARMONY	Herbicide	Other pesticide class	0.000406	1707.26	36.3078	1.56	2.95154e-09	1.19071e-12	0.999883								2.26529	2.33844	2.05217	2.54518	1.82088	2.16216e+09	30.0879	1.97123	6.3909	2.86105		3211.17	10797.6	0.356364	2488.55	558.352	6.54833	60.307	295.072	2.50522e-08	113.114	1.75994	256.404	3.45174	71.6228	168.149	0.863213	622.149	3211.17	558.352	295.072	1.75994
79-43-6	DICHLOROACETIC ACID	Metabolite	Other pesticide class	0.212	3.26956	8.31764	0.92	0.00084638	3.41445e-07	0.999613								1.29506	1.21729	1.29194	1.21522	1.23501	3878.54	9.26088	1.22608	2.55159	1.78805		5616.92	20.6785	0.684579	2488.55	886.911	13.715	60.307	435.049	0.0139657	113.114	5.71791	256.404	5.54954	71.6228	421.157	1.38122	622.149	5616.92	886.911	435.049	5.71791
79538-32-2	TETRAFLUTHRIN	Insecticide	Pyrethroid	2.36	0.293706	3.16228e+06	6.5	166.65	0.0672296	0.966055								5.31106	7.92721	4.43872	150257	3.66006	2100.92	95.4687	4.31043	18.4434	3.86954		1369.64	1.85756	0.105123	2488.55	258.145	0.000110921	60.307	146.799	0.0257823	113.114	0.554662	256.404	1.57853	71.6228	58.266	0.638241	622.149	1369.64	258.145	146.799	0.554662
79-57-2	OXYTETRACYLCINE	Bactericide, Antimicrobial, Veterinary treatment	Other pesticide class	0.328	2.11325	0.125893	-0.9	1.77507e-20	7.16096e-24	0.977372								0.882163	0.798786	0.968409	0.825982	0.985691	1.3384e+20	0.397672	0.908968	0.917723	0.846841		8245.9	13.3654	1.04325	2488.55	1183.21	20.178	60.307	545.091	4.04712e-19	113.114	133.157	256.404	7.4856	71.6228	1170.97	2.91637	622.149	8245.9	1183.21	545.091	133.157
79622-59-6	FLUAZINAM	Fungicide	Other pesticide class	0.472	1.46853	3630.78	3.56	0.00194144	7.83212e-07	0.999922								5.21606	7.67862	4.36428	173.338	3.60269	208273	93.4294	4.23747	18.0674	3.85455		1394.58	9.2878	0.108527	2488.55	262.548	0.0961514	60.307	149.136	0.000260075	113.114	0.566769	256.404	1.60571	71.6228	59.4783	0.640723	622.149	1394.58	262.548	149.136	0.566769
79-92-5	CAMPHENE	Insecticide, Insect attractant, Pheromone	Other pesticide class	5.78	0.119922	16595.9	4.22	9911.95	3.99866	0.999779								5.29001	7.87153	4.42223	789.378	3.64734	0.185614	95.0168	4.29427	18.3601	3.86626		1375.09	0.75845	0.105867	2488.55	259.108	0.0211137	60.307	147.31	291.824	113.114	0.5573	256.404	1.58448	71.6228	58.5303	0.638782	622.149	1375.09	259.108	147.31	0.5573
8001-35-2	TOXAPHENE (example isomer shown below)	Insecticide, Acaricide	Other pesticide class	64.3	0.0107799	602560	5.78	0.606	0.000244471	0.99332								5.31059	7.92595	4.43835	28631.6	3.65977	110092	95.4585	4.31007	18.4415	3.86946		1369.76	0.0681779	0.10514	2488.55	258.167	0.000582107	60.307	146.81	0.000492013	113.114	0.554722	256.404	1.57867	71.6228	58.2719	0.638253	622.149	1369.76	258.167	146.81	0.554722
8003-34-7	Pyrethrum	Insecticide, Acaricide, Veterinary treatment	Botanical insecticide	1.84	0.37671	1.41254e+06	6.15	2.81146	0.00113419	0.984527								5.31093	7.92684	4.43861	67118	3.65997	55627.2	95.4657	4.31033	18.4428	3.86952		1369.67	2.38252	0.105128	2488.55	258.151	0.000248319	60.307	146.802	0.000973745	113.114	0.55468	256.404	1.57857	71.6228	58.2677	0.638244	622.149	1369.67	258.151	146.802	0.55468
80-06-8	DIMITE	Insecticide, Acaricide, Miticide	Other pesticide class	13.3	0.0521163	28183.8	4.45	0.0055969	2.25789e-06	0.99965								5.29869	7.89444	4.42903	1339.98	3.65258	557948	95.2031	4.30093	18.3944	3.86761		1372.84	0.329612	0.10556	2488.55	258.71	0.012438	60.307	147.099	9.7082e-05	113.114	0.55621	256.404	1.58202	71.6228	58.4211	0.638559	622.149	1372.84	258.71	147.099	0.55621
80-33-1	CHLORFENSON	Acaricide, Miticide	Other pesticide class	10.3	0.0672958	16218.1	4.21	0.0256643	1.03535e-05	0.999783								5.28952	7.87023	4.42184	771.428	3.64705	70057.3	95.0063	4.29389	18.3581	3.86618		1375.21	0.425616	0.105884	2488.55	259.13	0.0216049	60.307	147.322	0.000773177	113.114	0.557362	256.404	1.58462	71.6228	58.5365	0.638795	622.149	1375.21	259.13	147.322	0.557362
80-38-6	4-CHLOROPHENYL BENZENESULFONATE	Acaricide, Insecticide, Miticide	Organochlorine	1.54	0.450096	3715.35	3.57	0.00328076	1.32352e-06	0.999921								5.21818	7.68409	4.36594	177.356	3.60397	126103	93.4749	4.2391	18.0758	3.85489		1394.02	2.84665	0.108449	2488.55	262.448	0.0939729	60.307	149.083	0.000429544	113.114	0.566493	256.404	1.6051	71.6228	59.4507	0.640667	622.149	1394.02	262.448	149.083	0.566493
80-56-8	ALPHA-PINENE	Fungicide	Botanical insecticide	7.57	0.091565	67608.3	4.83	29694	11.9791	0.999213								5.30596	7.91368	4.43472	3213.25	3.65697	0.252163	95.3592	4.30652	18.4232	3.86874		1370.95	0.579107	0.105303	2488.55	258.378	0.00518686	60.307	146.922	214.808	113.114	0.555299	256.404	1.57997	71.6228	58.3298	0.638372	622.149	1370.95	258.378	146.922	0.555299
8061-51-6	Lignosulfonic acid, sodium salt	Other product constituent, Adjuvant	Other pesticide class	0.00399	173.721	0.000354813	-3.45	7.7442e-28	3.12415e-31	0.108678								0.875174	0.791966	0.962933	0.820017	0.981471	3.04984e+27	0.247643	0.9036	0.890066	0.825748		8311.75	1098.71	1.05223	2488.55	1189.94	20.3248	60.307	547.435	1.77605e-26	113.114	213.827	256.404	7.53007	71.6228	1207.35	2.99086	622.149	8311.75	1189.94	547.435	213.827
8065-36-9	BUFENCARB	Insecticide	Carbamate	0.232	2.9877	4073.8	3.61	0.908805	0.000366628	0.999917								5.22621	7.70484	4.37223	194.388	3.60882	498.896	93.6472	4.24526	18.1076	3.85617		1391.88	18.8959	0.108157	2488.55	262.071	0.0857391	60.307	148.883	0.108573	113.114	0.565451	256.404	1.60277	71.6228	59.3464	0.640453	622.149	1391.88	262.071	148.883	0.565451
80844-07-1	ETOFENPROX	Insecticide	Pyrethroid	16.9	0.0410146	1.12202e+07	7.05	10.4918	0.00423258	0.88922								5.31114	7.92742	4.43878	533132	3.6601	118403	95.4704	4.3105	18.4437	3.86955		1369.62	0.259399	0.10512	2488.55	258.141	3.12618e-05	60.307	146.797	0.000457476	113.114	0.554652	256.404	1.57851	71.6228	58.265	0.638239	622.149	1369.62	258.141	146.797	0.554652
81-07-2	Saccharin	Metabolite	Other pesticide class	0.256	2.70761	8.12831	0.91	6.28918e-07	2.53717e-10	0.999605								1.28639	1.20818	1.28514	1.20622	1.22978	5.1863e+06	9.07472	1.21942	2.51727	1.77297		5654.78	17.1244	0.689745	2488.55	891.601	13.8173	60.307	436.901	1.04442e-05	113.114	5.83521	256.404	5.57985	71.6228	426.899	1.39297	622.149	5654.78	891.601	436.901	5.83521
81334-34-1	IMAZAPYR	Herbicide	Other pesticide class	0.00256	270.761	1.65959	0.22	2.76541e-10	1.11561e-13	0.998213								0.965805	0.881067	1.03395	0.898856	1.0362	9.20502e+09	2.19312	0.973206	1.2487	1.08277		7531.78	1712.44	0.945823	2488.55	1108.21	18.5421	60.307	518.523	5.88447e-09	113.114	24.145	256.404	6.9915	71.6228	860.591	2.28091	622.149	7531.78	1108.21	518.523	24.145
81335-77-5	Imazethapyr	Herbicide	Other pesticide class	0.00775	89.4383	398.107	2.6	6.25526e-10	2.52348e-13	0.999951								4.57237	6.15862	3.85991	19.7362	3.214	7.42398e+10	79.6118	3.7431	15.5203	3.73795		1590.91	565.657	0.135312	2488.55	296.855	0.844472	60.307	167.172	7.29618e-10	113.114	0.665139	256.404	1.81779	71.6228	69.2398	0.660709	622.149	1590.91	296.855	167.172	0.665139
81405-85-8	Imazamethabenz (isomer mix)	Herbicide	Other pesticide class	0.00687	100.895	3981.07	3.6	3.8986e-07	1.57277e-10	0.999918								5.22427	7.69982	4.37071	189.982	3.60764	1.13665e+09	93.6055	4.24377	18.0999	3.85586		1392.39	638.113	0.108228	2488.55	262.162	0.0877276	60.307	148.931	4.76549e-08	113.114	0.565703	256.404	1.60333	71.6228	59.3716	0.640505	622.149	1392.39	262.162	148.931	0.565703
81406-37-3	Fluroxypyr-meptyl	Herbicide	Other pesticide class	0.153	4.53037	33884.4	4.53	0.0054742	2.20839e-06	0.999587								5.30079	7.89998	4.43067	1610.85	3.65385	685749	95.248	4.30254	18.4027	3.86794		1372.29	28.6525	0.105486	2488.55	258.614	0.0103465	60.307	147.048	7.8989e-05	113.114	0.555947	256.404	1.58143	71.6228	58.3947	0.638505	622.149	1372.29	258.614	147.048	0.555947
81777-89-1	CLOMAZONE	Herbicide	Other pesticide class	0.383	1.80978	316.228	2.5	0.0041713	1.68278e-06	0.99995								4.41952	5.83493	3.74014	15.8457	3.1217	8959.67	76.3308	3.62572	14.9154	3.70571		1645.93	11.4461	0.142818	2488.55	306.361	1.05181	60.307	172.115	0.00604561	113.114	0.693729	256.404	1.87664	71.6228	72.0475	0.666457	622.149	1645.93	306.361	172.115	0.693729
81-81-2	Warfarin	Rodenticide	Other pesticide class	0.0833	8.32109	501.187	2.7	0.00027977	1.12864e-07	0.999952								4.7035	6.44695	3.96266	24.6341	3.29318	206783	82.4268	3.84382	16.0392	3.76408		1546.56	52.6271	0.12926	2488.55	289.158	0.67657	60.307	163.153	0.00026195	113.114	0.642424	256.404	1.77016	71.6228	66.9997	0.656122	622.149	1546.56	289.158	163.153	0.642424
81-82-3	COUMACHLOR	Rodenticide	Other pesticide class	0.399	1.73721	758.578	2.88	2.22121e-07	8.96078e-11	0.999951								4.89012	6.87523	4.10889	36.8641	3.40587	3.88746e+08	86.4327	3.98714	16.7777	3.79904		1487.54	10.9871	0.121208	2488.55	278.867	0.452111	60.307	157.755	1.39337e-07	113.114	0.612649	256.404	1.70653	71.6228	64.0507	0.650085	622.149	1487.54	278.867	157.755	0.612649
82097-50-5	Triasulfuron	Herbicide	Other pesticide class	0.00559	123.998	275.423	2.44	9.25883e-09	3.73518e-12	0.999949								4.31703	5.62495	3.65983	13.9068	3.05981	3.54858e+09	74.1306	3.547	14.5099	3.68292		1685.01	784.229	0.148149	2488.55	313.084	1.19845	60.307	175.596	1.52643e-08	113.114	0.714319	256.404	1.91829	71.6228	74.0615	0.67058	622.149	1685.01	313.084	175.596	0.714319
82558-50-7	Isoxaben	Herbicide	Other pesticide class	0.502	1.38077	8709.64	3.94	0.00012827	5.17464e-08	0.999866								5.27102	7.8216	4.40735	414.661	3.63588	7.53616e+06	94.6092	4.27968	18.2849	3.86328		1380.04	8.73275	0.106543	2488.55	259.983	0.0401935	60.307	147.775	7.18757e-06	113.114	0.559701	256.404	1.58988	71.6228	58.7708	0.639275	622.149	1380.04	259.983	147.775	0.559701
82560-54-1	BENFURACARB	Insecticide	Carbamate	0.463	1.49708	19952.6	4.3	0.0013635	5.5006e-07	0.999742								5.29356	7.88088	4.42501	948.875	3.64949	1.62189e+06	95.0929	4.29699	18.3741	3.86681		1374.17	9.46834	0.105741	2488.55	258.945	0.0175647	60.307	147.224	3.33972e-05	113.114	0.556854	256.404	1.58347	71.6228	58.4856	0.638691	622.149	1374.17	258.945	147.224	0.556854
82657-04-3	Bifenthrin	Insecticide, Acaricide	Pyrethroid	15.5	0.0447192	1.41254e+08	8.15	0.101	4.07452e-05	0.389415								5.31117	7.9275	4.43881	6.71172e+06	3.66012	1.54843e+08	95.471	4.31052	18.4438	3.86955		1369.61	0.282828	0.105119	2488.55	258.14	2.48322e-06	60.307	146.796	3.49817e-07	113.114	0.554649	256.404	1.5785	71.6228	58.2646	0.638238	622.149	1369.61	258.14	146.796	0.554649
82-68-8	Pentachloronitrobenzene	Fungicide	Other pesticide class	3.73	0.18583	43651.6	4.64	4.4642	0.00180094	0.999479								5.30311	7.90612	4.43249	2074.94	3.65525	1083.13	95.2979	4.30432	18.4119	3.8683		1371.69	1.17529	0.105404	2488.55	258.508	0.00803236	60.307	146.992	0.0500093	113.114	0.555657	256.404	1.58078	71.6228	58.3656	0.638445	622.149	1371.69	258.508	146.992	0.555657
83055-99-6	BENSULFURON-METHYL (PH7)	Herbicide	Other pesticide class	0.00198	350.074	151.356	2.18	3.8178e-10	1.54017e-13	0.999942								3.78287	4.61399	3.24129	8.01174	2.73727	5.00798e+10	62.6644	3.13676	12.3962	3.54619		1922.94	2214.06	0.18061	2488.55	353.512	2.08028	60.307	196.288	1.08161e-09	113.114	0.845023	256.404	2.16917	71.6228	86.6899	0.696436	622.149	1922.94	353.512	196.288	0.845023
83121-18-0	TEFLUBENZURON	Insecticide, Veterinary treatment	Benzoylurea	0.503	1.37803	36307.8	4.56	1.5958e-05	6.43774e-09	0.99956								5.30148	7.90181	4.43121	1726	3.65427	2.52051e+08	95.2629	4.30307	18.4054	3.86805		1372.11	8.71539	0.105461	2488.55	258.583	0.00965625	60.307	147.031	2.14903e-07	113.114	0.555861	256.404	1.58123	71.6228	58.3861	0.638487	622.149	1372.11	258.583	147.031	0.555861
83164-33-4	DIFLUFENICAN	Herbicide	Other pesticide class	2.46	0.281767	79432.8	4.9	0.032825	1.32422e-05	0.999082								5.30674	7.91573	4.43533	3775.1	3.65744	267994	95.3758	4.30711	18.4263	3.86887		1370.75	1.78205	0.105276	2488.55	258.342	0.0044149	60.307	146.904	0.000202119	113.114	0.555203	256.404	1.57975	71.6228	58.3201	0.638352	622.149	1370.75	258.342	146.904	0.555203
834-12-8	AMETRYNE	Herbicide	Other pesticide class	0.104	6.66488	954.993	2.98	0.00024543	9.90109e-08	0.999949								4.97006	7.0655	4.17152	46.1968	3.45414	440432	88.1487	4.04854	17.094	3.81327		1463.61	42.1523	0.117944	2488.55	274.68	0.360775	60.307	155.55	0.000122985	113.114	0.600723	256.404	1.68065	71.6228	62.8654	0.647658	622.149	1463.61	274.68	155.55	0.600723
83-79-4	ROTENONE	Insecticide, Acaricide, Veterinary treatment	Botanical insecticide	0.0833	8.32109	12589.3	4.1	0.00018249	7.36196e-08	0.999823								5.28332	7.8539	4.41698	599.003	3.6433	7.65085e+06	94.8731	4.28913	18.3336	3.86521		1376.83	52.6271	0.106104	2488.55	259.415	0.027824	60.307	147.474	7.07982e-06	113.114	0.558144	256.404	1.58638	71.6228	58.6149	0.638955	622.149	1376.83	259.415	147.474	0.558144
84087-01-4	Quinclorac	Herbicide	Other pesticide class	0.263	2.63554	933.254	2.97	0.0196131	7.91226e-06	0.99995								4.96274	7.0479	4.16579	45.1639	3.44972	5388.68	87.9915	4.04291	17.065	3.81199		1465.77	16.6686	0.118239	2488.55	275.058	0.369026	60.307	155.749	0.0100519	113.114	0.601795	256.404	1.68299	71.6228	62.9722	0.647876	622.149	1465.77	275.058	155.749	0.601795
841-06-5	METHOPROPTRYNE	Herbicide	Other pesticide class	0.0762	9.09642	660.693	2.82	3.2118e-05	1.2957e-08	0.999951								4.83444	6.74516	4.06526	32.2131	3.37225	2.35107e+06	85.2375	3.94438	16.5573	3.78887		1504.67	57.5307	0.123545	2488.55	281.86	0.517388	60.307	159.327	2.30392e-05	113.114	0.621239	256.404	1.72503	71.6228	64.903	0.65183	622.149	1504.67	281.86	159.327	0.621239
84-65-1	ANTHRAQUINONE	Repellent	Other pesticide class	0.386	1.79572	2454.71	3.39	0.0023735	9.57512e-07	0.999935								5.17192	7.56542	4.3297	117.456	3.57604	115500	92.4819	4.20357	17.8928	3.84741		1406.48	11.3571	0.11015	2488.55	264.645	0.141897	60.307	150.248	0.000468976	113.114	0.572576	256.404	1.61866	71.6228	60.0589	0.641912	622.149	1406.48	264.645	150.248	0.572576
85-00-7	DIQUAT DIBROMIDE	Herbicide	Other pesticide class	0.0076	91.2036	0.00151356	-2.82	4.64565e-10	1.87414e-13	0.342155								0.875239	0.792029	0.962983	0.820072	0.98151	5.0843e+09	0.24903	0.903649	0.890322	0.825944		8311.14	576.821	1.05215	2488.55	1189.88	20.3234	60.307	547.414	1.06537e-08	113.114	212.636	256.404	7.52965	71.6228	1207	2.99015	622.149	8311.14	1189.88	547.414	212.636
85-34-7	FENAC	Herbicide	Other pesticide class	1.96	0.353647	1584.89	3.2	0.00178819	7.21389e-07	0.999944								5.09915	7.3819	4.27268	76.1267	3.53209	99450	90.9198	4.14768	17.6048	3.83539		1426.56	2.23665	0.112889	2488.55	268.177	0.218933	60.307	152.117	0.000544662	113.114	0.582413	256.404	1.64047	71.6228	61.0413	0.643923	622.149	1426.56	268.177	152.117	0.582413
85-41-6	PHTHALIMIDE	Metabolite	Other pesticide class	0.375	1.84839	14.1254	1.15	5.72172e-07	2.30825e-10	0.999757								1.54404	1.48543	1.48703	1.49117	1.38536	6.8611e+06	14.6056	1.4173	3.53685	2.16447		4711.16	11.6902	0.561006	2488.55	770.551	11.1769	60.307	387.835	7.89475e-06	113.114	3.62552	256.404	4.80079	71.6228	303.835	1.14102	622.149	4711.16	770.551	387.835	3.62552
86209-51-0	PRIMISULFURON-METHYL	Herbicide	Other pesticide class	0.00522	132.787	257.04	2.41	2.59243e-07	1.04583e-10	0.999949								4.26273	5.51593	3.61729	13.0333	3.02702	1.18886e+08	72.9651	3.5053	14.295	3.67045		1706.47	839.816	0.151078	2488.55	316.766	1.27877	60.307	177.498	4.55618e-07	113.114	0.725729	256.404	1.94111	71.6228	75.1746	0.67286	622.149	1706.47	316.766	177.498	0.725729
86-50-0	METHYL AZINPHOS	Insecticide, Acaricide	Organophosphate	2.2	0.315067	562.341	2.75	0.0024139	9.7381e-07	0.999952								4.7614	6.57749	4.00802	27.5398	3.32814	26770.9	83.6695	3.88828	16.2683	3.77519		1527.75	1.99265	0.126695	2488.55	285.885	0.605184	60.307	161.439	0.00202334	113.114	0.632882	256.404	1.74992	71.6228	66.0562	0.654191	622.149	1527.75	285.885	161.439	0.632882
86-86-2	1-Naphthaleneacetamide	Plant growth regulator	Other pesticide class	0.0802	8.64273	52.4807	1.72	0.000342596	1.38209e-07	0.999907								2.63838	2.8305	2.34451	3.31364	2.04617	23854	38.0967	2.25777	7.86727	3.0925		2757.08	54.6613	0.294412	2488.55	488.73	5.02972	60.307	262.584	0.00227075	113.114	1.38996	256.404	3.01367	71.6228	136.594	0.798608	622.149	2757.08	488.73	262.584	1.38996
86-87-3	NAPHTHALENEACETIC ACID	Plant growth regulator	Other pesticide class	1.09	0.635915	173.78	2.24	0.000565724	2.28223e-07	0.999944								3.91815	4.85761	3.34729	9.07722	2.81895	38185	65.5683	3.24065	12.9315	3.58401		1856.55	4.02187	0.171552	2488.55	342.317	1.8361	60.307	190.6	0.00141853	113.114	0.807599	256.404	2.09963	71.6228	83.1013	0.689088	622.149	1856.55	342.317	190.6	0.807599
86-88-4	N-1-NAPTHYLTHIOUREA	Rodenticide	Other pesticide class	0.0993	6.98033	44.6684	1.65	4.94462e-05	1.99475e-08	0.999897								2.47029	2.60411	2.2128	2.94243	1.94467	147784	34.4884	2.12867	7.2021	2.99562		2944.69	44.1474	0.320007	2488.55	517.821	5.66425	60.307	276.289	0.000366527	113.114	1.53538	256.404	3.19644	71.6228	149.209	0.824437	622.149	2944.69	517.821	276.289	1.53538
87130-20-9	CARBAMIC ACID, (3,4-DIETHOXYPHENYL)-, 1-METHYLET	Fungicide	Carbamate	0.0923	7.50972	812.831	2.91	0.084133	3.39408e-05	0.999951								4.91572	6.9357	4.12894	39.4419	3.42133	1097.73	86.9822	4.0068	16.879	3.80364		1479.79	47.4956	0.120151	2488.55	277.512	0.422562	60.307	157.042	0.0493441	113.114	0.608779	256.404	1.69815	71.6228	63.6663	0.649298	622.149	1479.79	277.512	157.042	0.608779
87237-48-7	HALOXYFOP-ETOTYL	Herbicide	Other pesticide class	0.261	2.65574	21379.6	4.33	1.2221e-06	4.93017e-10	0.999726								5.29473	7.88398	4.42592	1016.68	3.65019	1.93883e+09	95.1181	4.29789	18.3787	3.867		1373.86	16.7963	0.1057	2488.55	258.891	0.0163932	60.307	147.195	2.79379e-08	113.114	0.556707	256.404	1.58314	71.6228	58.4709	0.63866	622.149	1373.86	258.891	147.195	0.556707
872-50-4	N-METHYLPYRROLIDONE	Other product constituent	Other pesticide class	0.0107	64.7801	0.416869	-0.38	0.0003232	1.30385e-07	0.993031								0.898279	0.814544	0.981036	0.839808	0.995422	7450.41	0.743603	0.921344	0.981493	0.894623		8097.97	409.705	1.02307	2488.55	1167.98	19.8458	60.307	539.763	0.00727029	113.114	71.2112	256.404	7.38504	71.6228	1094.88	2.7606	622.149	8097.97	1167.98	539.763	71.2112
87392-12-9	S-Metolachlor	Herbicide	Other pesticide class	0.184	3.7671	794.328	2.9	0.000909	3.66707e-07	0.999951								4.90735	6.91587	4.12238	38.5628	3.41627	99347.8	86.8025	4.00037	16.8458	3.80214		1482.31	23.8252	0.120496	2488.55	277.954	0.432196	60.307	157.274	0.000545223	113.114	0.610039	256.404	1.70088	71.6228	63.7916	0.649554	622.149	1482.31	277.954	157.274	0.610039
87-51-4	INDOLE-3-ACETIC ACID	Plant growth regulator	Botanical insecticide	0.265	2.61565	25.704	1.41	3.27021e-05	1.31926e-08	0.99985								1.95844	1.96076	1.81174	2.04133	1.63559	159246	23.501	1.73556	5.17666	2.6163		3714.3	16.5428	0.425005	2488.55	632.451	8.1646	60.307	328.5	0.000340145	113.114	2.25322	256.404	3.92044	71.6228	207.59	0.943964	622.149	3714.3	632.451	328.5	2.25322
87546-18-7	FLUMICLORAC-PENTYL	Herbicide	Other pesticide class	11.3	0.0613405	97723.7	4.99	2.62545e-05	1.05915e-08	0.99888								5.30757	7.91793	4.43598	4644.19	3.65794	4.12196e+08	95.3936	4.30775	18.4295	3.86899		1370.54	0.38795	0.105246	2488.55	258.304	0.00358871	60.307	146.884	1.3141e-07	113.114	0.555099	256.404	1.57952	71.6228	58.3097	0.638331	622.149	1370.54	258.304	146.884	0.555099
87674-68-8	DIMETHENAMID	Herbicide	Other pesticide class	0.0396	17.5037	141.254	2.15	0.008282	3.34111e-06	0.999941								3.71295	4.49114	3.1865	7.53172	2.69504	2173.5	61.1635	3.08306	12.1195	3.52568		1959.15	110.703	0.185551	2488.55	359.59	2.21286	60.307	199.363	0.0249214	113.114	0.86576	256.404	2.20696	71.6228	88.6691	0.700488	622.149	1959.15	359.59	199.363	0.86576
87-86-5	pentachlorophenol	Insecticide, Herbicide, Fungicide, Molluscicide, Plant growth regulator	Organochlorine	2.2	0.315067	131826	5.12	0.0024745	9.98258e-07	0.998502								5.3085	7.92041	4.43671	6264.56	3.65851	5.89923e+06	95.4137	4.30846	18.4332	3.86914		1370.3	1.99265	0.105213	2488.55	258.262	0.00266047	60.307	146.861	9.18199e-06	113.114	0.554982	256.404	1.57926	71.6228	58.298	0.638307	622.149	1370.3	258.262	146.861	0.554982
88-04-0	4-CHLORO-3,5-DIMETHYL PHENOL	Fungicide, Bactericide, Microbiocide, Veterinary treatment	Other pesticide class	0.181	3.82954	1862.09	3.27	0.150346	6.06521e-05	0.999941								5.12942	7.45777	4.29639	89.2977	3.55037	1386.98	91.5696	4.17093	17.7246	3.84043		1418.14	24.2201	0.11174	2488.55	266.697	0.186642	60.307	151.334	0.0390538	113.114	0.578281	256.404	1.63133	71.6228	60.6288	0.643079	622.149	1418.14	266.697	151.334	0.578281
88283-41-4	PYRIFENOX	Fungicide	Other pesticide class	1.66	0.417559	5011.87	3.7	0.00335838	1.35483e-06	0.999907								5.24186	7.74545	4.3845	238.961	3.61827	165931	93.9832	4.25729	18.1695	3.85867		1387.72	2.64087	0.10759	2488.55	261.337	0.0697465	60.307	148.494	0.000326441	113.114	0.563429	256.404	1.59824	71.6228	59.1441	0.640039	622.149	1387.72	261.337	148.494	0.563429
886-50-0	TERBUTRYN	Herbicide, Metabolite	Other pesticide class	0.226	3.06702	5495.41	3.74	0.0021715	8.76022e-07	0.999902								5.24788	7.7611	4.38921	261.936	3.6219	281278	94.1123	4.2619	18.1933	3.85962		1386.13	19.3975	0.107373	2488.55	261.057	0.0636287	60.307	148.345	0.000192574	113.114	0.562657	256.404	1.59651	71.6228	59.0668	0.63988	622.149	1386.13	261.057	148.345	0.562657
88671-89-0	MYCLOBUTANIL	Fungicide	Triazole	5.35	0.12956	870.964	2.94	0.00043228	1.74389e-07	0.99995								4.9399	6.99323	4.1479	42.2041	3.43593	228537	87.5014	4.02538	16.9747	3.80795		1472.54	0.819409	0.119163	2488.55	276.245	0.394906	60.307	156.374	0.000237015	113.114	0.605167	256.404	1.69032	71.6228	63.3074	0.648563	622.149	1472.54	276.245	156.374	0.605167
88-85-7	Dinoseb	Herbicide	Other pesticide class	0.0575	12.0547	3630.78	3.56	0.046056	1.85798e-05	0.999922								5.21606	7.67862	4.36428	173.338	3.60269	8779.52	93.4294	4.23747	18.0674	3.85455		1394.58	76.2407	0.108527	2488.55	262.548	0.0961514	60.307	149.136	0.00616966	113.114	0.566769	256.404	1.60571	71.6228	59.4783	0.640723	622.149	1394.58	262.548	149.136	0.566769
88-99-3	O-PHTHALIC ACID	Metabolite	Other pesticide class	0.0793	8.74082	5.37032	0.73	2.02e-06	8.14904e-10	0.999422								1.15568	1.0725	1.18272	1.07517	1.15085	1.46357e+06	6.2689	1.11903	2.00004	1.52544		6294.35	55.2817	0.777001	2488.55	968.81	15.5014	60.307	466.865	3.70101e-05	113.114	8.44692	256.404	6.08042	71.6228	537.299	1.61901	622.149	6294.35	968.81	466.865	8.44692
89-83-8	THYMOL	Insecticide, Fungicide, Antiseptic, Biocide, Veterinary treatment	Botanical insecticide	0.194	3.57292	1995.26	3.3	0.048783	1.96799e-05	0.99994								5.14109	7.48719	4.30554	95.6255	3.55742	4576.81	91.82	4.17989	17.7708	3.84235		1414.92	22.5971	0.111301	2488.55	266.13	0.174291	60.307	151.034	0.011835	113.114	0.576703	256.404	1.62783	71.6228	60.4713	0.642756	622.149	1414.92	266.13	151.034	0.576703
9006-42-2	METIRAM	Fungicide	Dithiocarbamate	0.00229	302.684	1.99526	0.3	5.19265e-11	2.09481e-14	0.998507								0.983692	0.898823	1.04796	0.914806	1.047	4.97381e+10	2.57708	0.986943	1.31948	1.12957		7394.83	1914.34	0.927139	2488.55	1093.39	18.2188	60.307	513.174	1.08904e-09	113.114	20.5476	256.404	6.89419	71.6228	814.427	2.1864	622.149	7394.83	1093.39	513.174	20.5476
900-95-8	FENTIN ACETATE	Fungicide	Other pesticide class	0.0804	8.62123	13.1826	1.12	0.00378162	1.52558e-06	0.999742								1.50574	1.44336	1.45702	1.44637	1.36224	1010.5	13.7835	1.38789	3.3853	2.1129		4830.99	54.5254	0.577355	2488.55	786.421	11.5231	60.307	394.419	0.0536036	113.114	3.84177	256.404	4.90254	71.6228	317.438	1.16887	622.149	4830.99	786.421	394.419	3.84177
90-15-3	1-NAPHTHOL	Metabolite	Other pesticide class	0.434	1.59711	707.946	2.85	0.00606	2.44471e-06	0.999951								4.86305	6.81174	4.08767	34.4583	3.38952	13324	85.8516	3.96635	16.6705	3.79412		1495.82	10.101	0.122338	2488.55	280.314	0.483677	60.307	158.515	0.00406536	113.114	0.616796	256.404	1.71547	71.6228	64.4623	0.650927	622.149	1495.82	280.314	158.515	0.616796
90-43-7	2-Phenylphenol	Fungicide, Disinfectant, Preservative	Other pesticide class	0.583	1.18893	1230.27	3.09	0.10605	4.27825e-05	0.999947								5.04175	7.23979	4.2277	59.2766	3.49743	1306.68	89.6876	4.1036	17.3777	3.82569		1442.8	7.51945	0.115105	2488.55	271.03	0.281168	60.307	153.625	0.0414538	113.114	0.590415	256.404	1.6581	71.6228	61.8392	0.645557	622.149	1442.8	271.03	153.625	0.590415
90717-03-6	Quinmerac	Herbicide	Other pesticide class	0.0326	21.2622	741.31	2.87	1.81553e-05	7.32416e-09	0.999951								4.88126	6.8544	4.10195	36.0436	3.40052	4.65084e+06	86.2426	3.98034	16.7426	3.79744		1490.24	134.474	0.121576	2488.55	279.339	0.462403	60.307	158.003	1.16467e-05	113.114	0.614	256.404	1.70944	71.6228	64.1848	0.650359	622.149	1490.24	279.339	158.003	0.614
91-20-3	naphthalene	Repellent, Other product constituent	Other pesticide class	4.53	0.153013	2511.89	3.4	46.1611	0.0186222	0.999934								5.175	7.57326	4.3321	120.173	3.57789	6.07587	92.5479	4.20593	17.9049	3.84791		1405.65	0.967735	0.110036	2488.55	264.498	0.138689	60.307	150.17	8.91504	113.114	0.572168	256.404	1.61775	71.6228	60.0181	0.641828	622.149	1405.65	264.498	150.17	0.572168
91465-08-6	LAMBDA-CYHALOTHRIN	Insecticide	Pyrethroid	3.77	0.183859	10000000	7	0.14948	6.03029e-05	0.90006								5.31114	7.92741	4.43878	475154	3.6601	7.4068e+06	95.4703	4.31049	18.4437	3.86955		1369.62	1.16282	0.105121	2488.55	258.141	3.50763e-05	60.307	146.797	7.3131e-06	113.114	0.554653	256.404	1.57851	71.6228	58.265	0.638239	622.149	1369.62	258.141	146.797	0.554653
91-53-2	ETHOXYQUIN	Fungicide, Veterinary treatment, Other product constituent	Other pesticide class	2.58	0.268662	7413.1	3.87	0.219052	8.83697e-05	0.99988								5.26408	7.80339	4.4019	353.056	3.63168	3757.62	94.4601	4.27435	18.2574	3.86219		1381.86	1.69916	0.106791	2488.55	260.304	0.0472069	60.307	147.946	0.0144152	113.114	0.560585	256.404	1.59186	71.6228	58.8593	0.639456	622.149	1381.86	260.304	147.946	0.560585
919-86-8	DEMETON-S-METHYL	Insecticide, Acaricide	Organophosphate	0.0246	28.1767	10.4713	1.02	0.0027775	1.12049e-06	0.999685								1.39113	1.31929	1.36722	1.31755	1.29303	1267.75	11.3233	1.29987	2.93178	1.94556		5228.99	178.205	0.631654	2488.55	838.076	12.6498	60.307	415.529	0.0427268	113.114	4.67646	256.404	5.23452	71.6228	366.542	1.2694	622.149	5228.99	838.076	415.529	4.67646
92-52-4	biphenyl	Fungicide	Other pesticide class	1.68	0.412588	9549.93	3.98	31.108	0.0125495	0.999857								5.27453	7.83079	4.41009	454.588	3.63799	34.0651	94.6844	4.28237	18.2988	3.86383		1379.12	2.60943	0.106418	2488.55	259.821	0.0366632	60.307	147.689	1.59009	113.114	0.559257	256.404	1.58888	71.6228	58.7263	0.639183	622.149	1379.12	259.821	147.689	0.559257
934-32-7	2-AMINOBENZIMIDAZOLE	Metabolite	Other pesticide class	0.0398	17.4158	8.12831	0.91	2.3917e-07	9.64856e-11	0.999605								1.28639	1.20818	1.28514	1.20622	1.22978	1.36378e+07	9.07472	1.21942	2.51727	1.77297		5654.78	110.147	0.689745	2488.55	891.601	13.8173	60.307	436.901	3.9718e-06	113.114	5.83521	256.404	5.57985	71.6228	426.899	1.39297	622.149	5654.78	891.601	436.901	5.83521
93-71-0	2-CHLORO-N,N-DIALLYLACETAMIDE	Herbicide	Other pesticide class	0.0995	6.9663	61.6595	1.79	0.010807	4.35974e-06	0.999915								2.81211	3.07306	2.48064	3.74977	2.15108	850.24	41.826	2.3912	8.55474	3.18205		2586.75	44.0587	0.271174	2488.55	461.91	4.44472	60.307	249.778	0.0637075	113.114	1.26603	256.404	2.84551	71.6228	125.617	0.776135	622.149	2586.75	461.91	249.778	1.26603
93-72-1	SILVEX	Herbicide, Plant growth regulator	Other pesticide class	21.2	0.0326956	6309.57	3.8	0.00130579	5.26781e-07	0.999893								5.25594	7.78213	4.39553	300.621	3.62677	536789	94.2854	4.2681	18.2253	3.8609		1384	0.206785	0.107083	2488.55	260.682	0.0554407	60.307	148.146	0.000100909	113.114	0.561623	256.404	1.59419	71.6228	58.9633	0.639669	622.149	1384	260.682	148.146	0.561623
93-76-5	2,4,5-trichlorophenoxyacetic acid	Herbicide, Plant growth regulator	Other pesticide class	15.2	0.0456018	2041.74	3.31	0.00459514	1.85376e-06	0.999939								5.14482	7.49661	4.30846	97.8339	3.55967	49708.1	91.9	4.18275	17.7855	3.84297		1413.9	0.288411	0.111161	2488.55	265.95	0.170357	60.307	150.939	0.00108969	113.114	0.576201	256.404	1.62672	71.6228	60.4212	0.642653	622.149	1413.9	265.95	150.939	0.576201
94125-34-5	PROSULFURON	Herbicide	Other pesticide class	0.0422	16.4253	3630.78	3.56	2.5452e-07	1.02678e-10	0.999922								5.21606	7.67862	4.36428	173.338	3.60269	1.58867e+09	93.4294	4.23747	18.0674	3.85455		1394.58	103.882	0.108527	2488.55	262.548	0.0961514	60.307	149.136	3.40955e-08	113.114	0.566769	256.404	1.60571	71.6228	59.4783	0.640723	622.149	1394.58	262.548	149.136	0.566769
94361-06-5	Cyproconazole	Fungicide	Triazole	2.9	0.239016	794.328	2.9	7.171e-05	2.89291e-08	0.999951								4.90735	6.91587	4.12238	38.5628	3.41627	1.25934e+06	86.8025	4.00037	16.8458	3.80214		1482.31	1.51167	0.120496	2488.55	277.954	0.432196	60.307	157.274	4.3012e-05	113.114	0.610039	256.404	1.70088	71.6228	63.7916	0.649554	622.149	1482.31	277.954	157.274	0.610039
944-22-9	FONOPHOS	Insecticide	Organophosphate	0.762	0.909642	8709.64	3.94	0.70498	0.000284402	0.999866								5.27102	7.8216	4.40735	414.661	3.63588	1371.19	94.6092	4.27968	18.2849	3.86328		1380.04	5.75307	0.106543	2488.55	259.983	0.0401935	60.307	147.775	0.0395033	113.114	0.559701	256.404	1.58988	71.6228	58.7708	0.639275	622.149	1380.04	259.983	147.775	0.559701
94-74-6	2-Methyl-4-chlorophenoxyacetic acid	Herbicide, Metabolite	Other pesticide class	1.33	0.521163	1778.28	3.25	0.00013433	5.41911e-08	0.999942								5.12122	7.43716	4.28997	85.3155	3.54542	1.48326e+06	91.3936	4.16463	17.6922	3.83907		1420.41	3.29612	0.11205	2488.55	267.096	0.195353	60.307	151.545	3.65186e-05	113.114	0.579394	256.404	1.6338	71.6228	60.74	0.643306	622.149	1420.41	267.096	151.545	0.579394
94-75-7	2-(2,4-dichlorophenoxy)acetic acid	Herbicide, Plant Growth Regulator, Metabolite	Other pesticide class	10.1	0.0686284	645.654	2.81	0.0035754	1.44238e-06	0.999951								4.82456	6.72227	4.05751	31.4985	3.36628	20654	85.0253	3.93679	16.5182	3.78704		1507.75	0.434044	0.123966	2488.55	282.398	0.529126	60.307	159.61	0.00262257	113.114	0.62279	256.404	1.72835	71.6228	65.0567	0.652144	622.149	1507.75	282.398	159.61	0.62279
94-81-5	MCPB	Herbicide	Other pesticide class	1.5	0.462098	3162.28	3.5	0.00027371	1.1042e-07	0.999927								5.20232	7.64321	4.35351	151.077	3.59439	1.28778e+06	93.1343	4.22691	18.0131	3.85234		1398.27	2.92256	0.109029	2488.55	263.197	0.110319	60.307	149.481	4.2062e-05	113.114	0.568565	256.404	1.60972	71.6228	59.6579	0.641091	622.149	1398.27	263.197	149.481	0.568565
94-82-6	2,4-DB	Herbicide	Other pesticide class	15.9	0.0435942	3388.44	3.53	0.0459932	1.85545e-05	0.999925								5.20942	7.66148	4.35907	161.823	3.59868	8208.13	93.2867	4.23237	18.0411	3.85348		1396.36	0.275713	0.108769	2488.55	262.862	0.102993	60.307	149.303	0.00659915	113.114	0.567636	256.404	1.60765	71.6228	59.565	0.640901	622.149	1396.36	262.862	149.303	0.567636
950-37-8	METHIDATHION	Insecticide, Acaricide	Organophosphate	0.209	3.31649	158.489	2.2	0.00072417	2.92143e-07	0.999943								3.82867	4.69558	3.27717	8.35067	2.76492	27492.5	63.6475	3.17193	12.5774	3.55926		1899.94	20.9753	0.177472	2488.55	349.641	1.99585	60.307	194.324	0.00197024	113.114	0.831971	256.404	2.14512	71.6228	85.4408	0.693878	622.149	1899.94	349.641	194.324	0.831971
95-16-9	BENZOTHIAZOLE	Metabolite	Other pesticide class	0.112	6.18881	102.329	2.01	0.311019	0.000125471	0.999934								3.37091	3.91841	2.9185	5.68221	2.48851	44.021	53.8213	2.82037	10.766	3.41444		2157.94	39.1414	0.212671	2488.55	392.611	2.93313	60.307	215.909	1.23047	113.114	0.983865	256.404	2.41251	71.6228	99.8163	0.723311	622.149	2157.94	392.611	215.909	0.983865
95266-40-3	Trinexapac-ethyl	Plant growth regulator	Other pesticide class	0.00638	108.644	39.8107	1.6	0.19392	7.82308e-05	0.99989								2.35467	2.45291	2.12221	2.71162	1.87486	34.9089	32.0067	2.03988	6.74461	2.92217		3089.27	687.122	0.339733	2488.55	539.925	6.14639	60.307	286.577	1.55166	113.114	1.65443	256.404	3.33557	71.6228	159.33	0.845159	622.149	3089.27	539.925	286.577	1.65443
95737-68-1	PYRIPROXYFEN	Insecticide, Veterinary treatment	Other pesticide class	2.07	0.334854	354813	5.55	0.554388	0.00022365	0.99604								5.31018	7.92486	4.43803	16859.9	3.65952	70863.8	95.4497	4.30976	18.4399	3.8694		1369.86	2.1178	0.105154	2488.55	258.185	0.000988539	60.307	146.82	0.000764377	113.114	0.554773	256.404	1.57878	71.6228	58.277	0.638264	622.149	1369.86	258.185	146.82	0.554773
957-51-7	DIPHENAMID	Herbicide	Other pesticide class	0.087	7.96721	724.436	2.86	3.6663e-06	1.47905e-09	0.999951								4.87224	6.83324	4.09488	35.2418	3.39507	2.2521e+07	86.0489	3.97341	16.7069	3.7958		1493	50.389	0.121953	2488.55	279.821	0.472923	60.307	158.256	2.40516e-06	113.114	0.615382	256.404	1.71243	71.6228	64.322	0.65064	622.149	1493	279.821	158.256	0.615382
95-76-1	3,4-DICHLOROANILINE	Metabolite	Other pesticide class	0.516	1.34331	489.779	2.69	1.4746	0.00059488	0.999952								4.69133	6.41975	3.95312	24.092	3.28583	38.3755	82.1654	3.83447	15.991	3.76171		1550.57	8.49581	0.129808	2488.55	289.855	0.691793	60.307	163.518	1.41149	113.114	0.644467	256.404	1.77448	71.6228	67.2016	0.656536	622.149	1550.57	289.855	163.518	0.644467
95-82-9	2,5-DICHLOROANILINE	Metabolite	Other pesticide class	0.538	1.28838	562.341	2.75	1.07186	0.000432408	0.999952								4.7614	6.57749	4.00802	27.5398	3.32814	60.2899	83.6695	3.88828	16.2683	3.77519		1527.75	8.1484	0.126695	2488.55	285.885	0.605184	60.307	161.439	0.898437	113.114	0.632882	256.404	1.74992	71.6228	66.0562	0.654191	622.149	1527.75	285.885	161.439	0.632882
95-95-4	2,4,5-trichlorophenol	Fungicide, Herbicide, Metabolite	Other pesticide class	0.734	0.944342	5248.07	3.72	0.16362	6.60072e-05	0.999904								5.24494	7.75344	4.38691	250.184	3.62012	3565.64	94.0492	4.25965	18.1817	3.85916		1386.91	5.97253	0.107479	2488.55	261.194	0.0666176	60.307	148.418	0.0151913	113.114	0.563034	256.404	1.59735	71.6228	59.1045	0.639958	622.149	1386.91	261.194	148.418	0.563034
959-98-8	A-ENDOSULFAN	Insecticide, Acaricide	Organochlorine	5.39	0.128599	6760.83	3.83	6.565	0.00264844	0.999888								5.25959	7.79165	4.39838	322.063	3.62897	114.379	94.3636	4.2709	18.2397	3.86148		1383.04	0.813328	0.106952	2488.55	260.512	0.0517497	60.307	148.056	0.473572	113.114	0.561158	256.404	1.59315	71.6228	58.9167	0.639573	622.149	1383.04	260.512	148.056	0.561158
96-12-8	1,2-Dibromo-3-chloropropane	Nematicide, Insecticide, Fumigant, Fungicide	Other pesticide class	0.34	2.03867	912.011	2.96	14.847	0.00598955	0.99995								4.95527	7.02999	4.15994	44.1545	3.44521	6.9601	87.8313	4.03718	17.0355	3.81067		1467.98	12.8936	0.11854	2488.55	275.445	0.377463	60.307	155.953	7.78246	113.114	0.602893	256.404	1.68538	71.6228	63.0814	0.6481	622.149	1467.98	275.445	155.953	0.602893
96182-53-5	TEBUPIRIMFOS	Insecticide	Organophosphate	4.67	0.148426	15488.2	4.19	0.28785	0.000116124	0.999791								5.28851	7.86756	4.42105	736.745	3.64643	5965.46	94.9845	4.29311	18.3541	3.86602		1375.48	0.938724	0.10592	2488.55	259.177	0.022622	60.307	147.347	0.00908004	113.114	0.55749	256.404	1.5849	71.6228	58.5493	0.638821	622.149	1375.48	259.177	147.347	0.55749
96-18-4	1,2,3-trichloropropane	Other product constituent	Other pesticide class	0.527	1.31527	186.209	2.27	34.643	0.0139756	0.999945								3.9833	4.97781	3.39834	9.66777	2.85829	0.663286	66.9668	3.29069	13.1893	3.60139		1826.18	8.31848	0.16741	2488.55	337.175	1.72394	60.307	187.977	81.6641	113.114	0.790734	256.404	2.0677	71.6228	81.477	0.685763	622.149	1826.18	337.175	187.977	0.790734
96-24-2	3-CHLORO-1,2-PROPANEDIOL	Rodenticide, Chemiosterilant	Organochlorine	0.0129	53.7323	0.295121	-0.53	0.0029391	1.18569e-06	0.9902								0.89155	0.807959	0.975764	0.834023	0.991359	814.703	0.599168	0.916177	0.954867	0.874815		8159.08	339.833	1.03141	2488.55	1174.29	19.9835	60.307	541.975	0.0664864	113.114	88.3774	256.404	7.4267	71.6228	1125.41	2.82311	622.149	8159.08	1174.29	541.975	88.3774
96-45-7	Ethylenethiourea	Metabolite	Other pesticide class	0.00394	175.926	0.218776	-0.66	1.37562e-06	5.5495e-10	0.986837								0.88732	0.803823	0.97245	0.830395	0.988805	1.73452e+06	0.508372	0.912928	0.938129	0.862259		8197.98	1112.65	1.03671	2488.55	1178.3	20.0708	60.307	543.375	3.12286e-05	113.114	104.162	256.404	7.45312	71.6228	1145.49	2.86422	622.149	8197.98	1178.3	543.375	104.162
96489-71-3	PYRIDABEN	Insecticide, Acaricide	Other pesticide class	10.8	0.0641803	2.34423e+06	6.37	4.7672	0.00192317	0.974604								5.31103	7.9271	4.43869	111388	3.66003	54444.4	95.4679	4.3104	18.4432	3.86953		1369.65	0.405911	0.105125	2488.55	258.147	0.000149628	60.307	146.8	0.000994899	113.114	0.554667	256.404	1.57854	71.6228	58.2664	0.638242	622.149	1369.65	258.147	146.8	0.554667
97-17-6	DICHLOFENTHION	Insecticide	Other pesticide class	12.5	0.0554518	138038	5.14	95.748	0.0386265	0.998433								5.30862	7.92073	4.43681	6559.76	3.65858	159.643	95.4162	4.30856	18.4337	3.86916		1370.27	0.350707	0.105209	2488.55	258.256	0.00254074	60.307	146.858	0.339299	113.114	0.554967	256.404	1.57922	71.6228	58.2965	0.638304	622.149	1370.27	258.256	146.858	0.554967
97-23-4	PHENOL,2,2'-METHYLENEBIS 4-CHLORO-	Fungicide, Algicide, Bactericide, Veterinary treatment	Other pesticide class	0.3	2.31049	18197	4.26	1.1615e-07	4.6857e-11	0.999761								5.29187	7.87642	4.42368	865.457	3.64846	1.73661e+10	95.0566	4.29569	18.3674	3.86655		1374.61	14.6128	0.105801	2488.55	259.023	0.0192577	60.307	147.265	3.1191e-09	113.114	0.557067	256.404	1.58395	71.6228	58.5069	0.638734	622.149	1374.61	259.023	147.265	0.557067
973-21-7	DINOBUTON	Fungicide, Acaricide	Other pesticide class	0.268	2.58637	8709.64	3.94	0.0288706	1.16469e-05	0.999866								5.27102	7.8216	4.40735	414.661	3.63588	33482.6	94.6092	4.27968	18.2849	3.86328		1380.04	16.3576	0.106543	2488.55	259.983	0.0401935	60.307	147.775	0.00161776	113.114	0.559701	256.404	1.58988	71.6228	58.7708	0.639275	622.149	1380.04	259.983	147.775	0.559701
97-53-0	EUGENOL	Insecticide, Fungicide, Bactericide, Herbicide	Botanical insecticide	0.0895	7.74466	186.209	2.27	0.20099	8.1083e-05	0.999945								3.9833	4.97781	3.39834	9.66777	2.85829	114.325	66.9668	3.29069	13.1893	3.60139		1826.18	48.9814	0.16741	2488.55	337.175	1.72394	60.307	187.977	0.473795	113.114	0.790734	256.404	2.0677	71.6228	81.477	0.685763	622.149	1826.18	337.175	187.977	0.790734
97886-45-8	Dithiopyr	Herbicide	Other pesticide class	0.224	3.09441	56234.1	4.75	0.13495	5.44413e-05	0.999339								5.30491	7.91089	4.4339	2672.8	3.65634	46153.4	95.3366	4.30571	18.419	3.86858		1371.23	19.5707	0.10534	2488.55	258.426	0.00623565	60.307	146.948	0.00117362	113.114	0.555431	256.404	1.58027	71.6228	58.343	0.638399	622.149	1371.23	258.426	146.948	0.555431
98-01-1	FUFURAL	Fungicide, Biocide, Nematicide	Other pesticide class	0.107	6.47801	2.5704	0.41	0.38077	0.000153609	0.998832								1.014	0.929038	1.07171	0.942133	1.0653	6.95014	3.22764	1.01022	1.43941	1.20622		7173.81	40.9705	0.896985	2488.55	1069.16	17.6904	60.307	504.358	7.79361	113.114	16.4061	256.404	6.73534	71.6228	746.572	2.04747	622.149	7173.81	1069.16	504.358	16.4061
98-16-8	3-TRIFLUOROMETHYLANILINE	Metabolite	Other pesticide class	0.552	1.2557	194.984	2.29	2.69927	0.00108893	0.999946								4.02574	5.05716	3.43159	10.0848	2.88392	8.8727	67.8779	3.32329	13.3572	3.61244		1806.93	7.94174	0.164783	2488.55	333.907	1.65266	60.307	186.306	6.10487	113.114	0.78012	256.404	2.04742	71.6228	80.4525	0.683665	622.149	1806.93	333.907	186.306	0.78012
98967-40-9	FLUMETSULAM	Herbicide	Other pesticide class	0.241	2.87613	31.6228	1.5	2.4607e-09	9.92689e-13	0.999871								2.13693	2.17763	1.9516	2.32257	1.74338	2.38265e+09	27.3326	1.87265	5.88298	2.76582		3404.05	18.1902	0.382678	2488.55	587.126	7.17597	60.307	308.191	2.27338e-08	113.114	1.93735	256.404	3.63344	71.6228	182.666	0.892936	622.149	3404.05	587.126	308.191	1.93735
99129-21-2	CLETHODIM	Herbicide	Other pesticide class	0.995	0.69663	16218.1	4.21	9.38589e-05	3.78644e-08	0.999783								5.28952	7.87023	4.42184	771.428	3.64705	1.91561e+07	95.0063	4.29389	18.3581	3.86618		1375.21	4.40587	0.105884	2488.55	259.13	0.0216049	60.307	147.322	2.82764e-06	113.114	0.557362	256.404	1.58462	71.6228	58.5365	0.638795	622.149	1375.21	259.13	147.322	0.557362
99-30-9	2,6-DICHLORO-4-NITROANILINE	Fungicide	Other pesticide class	0.22	3.15067	630.957	2.8	0.0047167	1.9028e-06	0.999951								4.81449	6.69903	4.04963	30.8001	3.3602	15311.4	84.8092	3.92906	16.4784	3.78517		1510.9	19.9265	0.124396	2488.55	282.948	0.541123	60.307	159.899	0.00353767	113.114	0.624377	256.404	1.73176	71.6228	65.214	0.652466	622.149	1510.9	282.948	159.899	0.624377
99607-70-2	Cloquintocet-mexyl	Herbicide safener	Other pesticide class	0.212	3.26956	107152	5.03	8.181e-05	3.30036e-08	0.998775								5.30789	7.91878	4.43623	5092.18	3.65814	1.45042e+08	95.4004	4.30799	18.4308	3.86904		1370.46	20.6785	0.105235	2488.55	258.29	0.00327299	60.307	146.876	3.73456e-07	113.114	0.555059	256.404	1.57943	71.6228	58.3057	0.638322	622.149	1370.46	258.29	146.876	0.555059
99-65-0	1,3-Dinitrobenzene	Other product constituent	Other pesticide class	0.121	5.72849	30.903	1.49	0.004949	1.99652e-06	0.999869								2.11625	2.1521	1.93539	2.28836	1.73088	1168.58	26.8886	1.85676	5.80112	2.74957		3437.33	36.2301	0.387218	2488.55	592.043	7.28322	60.307	310.415	0.0463527	113.114	1.96935	256.404	3.66453	71.6228	185.244	0.898213	622.149	3437.33	592.043	310.415	1.96935
99-87-6	P-CYMENE	Fungicide	Botanical insecticide	2.06	0.336479	12589.3	4.1	1111	0.448197	0.999823								5.28332	7.8539	4.41698	599.003	3.6433	1.25671	94.8731	4.28913	18.3336	3.86521		1376.83	2.12808	0.106104	2488.55	259.415	0.027824	60.307	147.474	43.1021	113.114	0.558144	256.404	1.58638	71.6228	58.6149	0.638955	622.149	1376.83	259.415	147.474	0.558144
999-81-5	CHLORMEQUAT CHLORIDE	Plant growth regulator	Other pesticide class	0.0108	64.1803	0.000158489	-3.8	1.616e-09	6.51923e-13	0.0516505								0.875163	0.791955	0.962924	0.820008	0.981464	1.46153e+09	0.247408	0.903591	0.890023	0.825715		8311.85	405.911	1.05225	2488.55	1189.95	20.325	60.307	547.439	3.70616e-08	113.114	214.03	256.404	7.53014	71.6228	1207.41	2.99098	622.149	8311.85	1189.95	547.439	214.03
[truncated: 23 more columns]

## Sheet: Sheep
																		Partition coefficients (sheep)											Rate constants in the liver compartment				Rate constants in the kidney compartment			Rate constants in the lung compartment			Rate constants in the fat compartment		Rate constants in the muscle compartment		Rate constants in the mammary gland compartment			Rate constants in the blood compartment
CAS RN	Name	PesticideTargetClass	PesticideChemClass	Biotransformation half-life (fish)	Metabolic rate constant (fish) at 15 oC	KOW	log KOW	KH25C	KAir/Water	Euptake								KLiver/Blood	KLiver/Bile	KKidney/Blood	KKidney/Urine	KLung/Blood	KLung/Air (mass based)	KFat/Blood	KMuscle/Blood	Kmammary gland/Blood	Kmammary gland/Milk		k-Liver→Blood	km,Liver	ke,Bile	k+Blood→Liver	k-Kidney→Blood	ke,Urine	k+Blood→Kidney	k-Lung→Blood	ke,Exhalation	k+Blood→Lung	k-Fat→Blood	k+Blood→Fat	k-Muscle→Blood	k+Blood→Muscle	k-Mammary gland→Blood	ke,Milk	k+Blood→Mammary gland	k+Liver→Blood	k+Kidney→Blood	k+Lung→Blood	k+Fat→Blood
				Day	Day-1	L.L-1		Pa.m3.mol-1	Unitless	Unitless								Unitless	Unitless	Unitless	Unitless	Unitless	Unitless	Unitless	Unitless	Unitless	Unitless		day-1	day-1	day-1	day-1	day-1	day-1	day-1	day-1	day-1	day-1	day-1	day-1	day-1	day-1	day-1	day-1	day-1	day-1	day-1	day-1	day-1
1918-02-1	PICLORAM	Herbicide	Other pesticide class	0.0235	29.4956	79.4328	1.9	5.3833e-09	2.17172e-12	0.999926		Media/Products	Contents (g g-1)					3.38031	4.37782	2.28153	4.46387	2.08039	2.13664e+09	41.5986	3.22169	8.4029	1.96717		1120.61	186.546	0.114212	1147.88	2888.41	3.36031	399.394	165.834	1.46257e-08	83.6364	0.380323	64.2424	38.4539	927.273	67.6354	0.635431	206.667	1120.61	2888.41	165.834	0.380323
2164-08-1	LENACIL	Herbicide	Other pesticide class	0.0969	7.15322	1230.27	3.09	7.7871e-06	3.14146e-09	0.999947			Lipid (fat)	Non-lipid organics	Water	Others		5.14369	9.37555	3.206	57.0586	2.85925	1.84665e+07	70.6569	4.8582	13.6903	2.08012		736.437	45.2409	0.0533302	1147.88	2055.52	0.262888	399.394	120.661	1.69226e-06	83.6364	0.223912	64.2424	25.5005	927.273	41.5135	0.600927	206.667	736.437	2055.52	120.661	0.223912
2425-06-1	CAPTAFOL	Fungicide	Other pesticide class	5.65	0.122681	6309.57	3.8	0.00049692	2.00466e-07	0.999893		Blood	0.005	0.165	0.82	0.01		5.31729	10.097	3.29702	289.19	2.93593	1.46444e+06	73.5177	5.01931	14.2109	2.08709		712.393	0.775901	0.0495198	1147.88	1998.78	0.0518691	399.394	117.509	2.13393e-05	83.6364	0.215198	64.2424	24.682	927.273	39.9928	0.598919	206.667	712.393	1998.78	117.509	0.215198
2439-01-2	OXYTHIOQUINOX	Fungicide, Acaricide, Miticide, Insecticide	Dithiocarbamate	0.255	2.71822	6025.6	3.78	0.0062317	2.51398e-06	0.999896		Urine	0	0	0.95	0.05		5.31523	10.0881	3.29594	276.211	2.93502	111537	73.4837	5.0174	14.2047	2.08701		712.669	17.1915	0.0495636	1147.88	1999.43	0.0543062	399.394	117.546	0.000280177	83.6364	0.215298	64.2424	24.6914	927.273	40.0102	0.598942	206.667	712.669	1999.43	117.546	0.215298
2439-10-3	DODINE	Fungicide	Other pesticide class	0.0741	9.35421	14.1254	1.15	9.1001e-06	3.67114e-09	0.999757		Bile	0.0056	0.0004	0.894	0.1		1.69633	1.72112	1.39868	1.47923	1.33661	438959	13.8487	1.65888	3.35357	1.6235		2233.06	59.1611	0.290508	1147.88	4711.57	10.1404	399.394	258.116	7.11912e-05	83.6364	1.14241	64.2424	74.6809	927.273	169.471	0.769941	206.667	2233.06	4711.57	258.116	1.14241
2497-07-6	DISULFOTON SULFOXIDE	Metabolite	Organophosphate	0.201	3.44849	53.7032	1.73	0.000353308	1.42531e-07	0.999908		Milk	0.07	0.114	0.807	0.009		2.94242	3.55515	2.05196	3.28799	1.88699	24183.9	34.3827	2.81531	7.08992	1.91725		1287.38	21.8101	0.140641	1147.88	3211.56	4.56206	399.394	182.831	0.00129218	83.6364	0.460141	64.2424	44.0046	927.273	80.1608	0.651975	206.667	1287.38	3211.56	182.831	0.460141
2597-03-7	FENTHOATE	Insecticide, Acaricide	Organophosphate	0.0646	10.7298	4897.79	3.69	0.00055348	2.23284e-07	0.999908		Liver	0.05	0.222	0.714	0.014		5.30472	10.0427	3.29042	224.669	2.93038	1.02156e+06	73.3104	5.00764	14.1732	2.0866		714.082	67.8613	0.0497875	1147.88	2002.78	0.0667649	399.394	117.732	3.05905e-05	83.6364	0.215807	64.2424	24.7395	927.273	40.0993	0.59906	206.667	714.082	2002.78	117.732	0.215807
3813-05-6	BENAZOLIN	Herbicide	Other pesticide class	0.133	5.21163	21.8776	1.34	4.04e-08	1.62981e-11	0.99983		Kidney	0.03	0.165	0.792	0.013		2.03224	2.15504	1.57479	1.83352	1.48497	1.20935e+08	19.3841	1.97062	4.36078	1.74037		1863.95	32.9612	0.232014	1147.88	4184.69	8.18098	399.394	232.328	2.58404e-07	83.6364	0.816179	64.2424	62.8668	927.273	130.328	0.718239	206.667	1863.95	4184.69	232.328	0.816179
8018-01-7	MANCOZEB	Fungicide	Dithiocarbamate	0.0237	29.2467	4.16869	0.62	1.86281e-08	7.5149e-12	0.999266		Muscle	0.047	0.215	0.732	0.006		1.15066	1.09092	1.11261	1.0242	1.09559	1.52993e+08	4.85674	1.15247	1.7174	1.27136		3292.03	184.972	0.45833	1147.88	5923.02	14.6456	399.394	314.899	2.04257e-07	83.6364	3.25751	64.2424	107.497	927.273	330.927	0.983201	206.667	3292.03	5923.02	314.899	3.25751
10004-44-1	3-HYDROXY-5-METHYLISOXAZOLE	Fungicide	Other pesticide class	0.0172	40.2993	2.88403	0.46	0.0002121	8.55649e-08	0.998955		Fat	0.8	0	0.2	0		1.06819	1.00279	1.06937	0.965488	1.05916	12740.6	3.49771	1.07593	1.47011	1.1829		3546.2	254.874	0.498609	1147.88	6162.5	15.5362	399.394	325.729	0.00245278	83.6364	4.52322	64.2424	115.144	927.273	386.593	1.05673	206.667	3546.2	6162.5	325.729	4.52322
100-44-7	Benzyl chloride	Other product constituent	Other pesticide class	0.148	4.68343	199.526	2.3	41.612	0.016787	0.999946		Lung	0.026	0.167	0.797	0.011		4.28761	6.52466	2.75719	9.9523	2.48114	0.608188	56.5498	4.06372	11.1234	2.03722		883.476	29.6205	0.0766323	1147.88	2390.11	1.50719	399.394	139.049	51.3821	83.6364	0.279769	64.2424	30.486	927.273	51.0934	0.613581	206.667	883.476	2390.11	139.049	0.279769
100-51-6	benzyl alcohol	Metabolite	Other pesticide class	0.0267	25.9606	12.5893	1.1	0.034037	1.37311e-05	0.999732		Mammary gland	0.15	0.13	0.72	0		1.62156	1.62959	1.35948	1.40903	1.30358	112.171	12.6166	1.58949	3.12937	1.59037		2336.03	164.189	0.306826	1147.88	4847.43	10.6456	399.394	264.656	0.278591	83.6364	1.25398	64.2424	77.9413	927.273	181.613	0.785978	206.667	2336.03	4847.43	264.656	1.25398
100-52-7	benzyldehyde	Metabolite	Other pesticide class	0.156	4.44325	30.1995	1.48	2.6967	0.0010879	0.999866								2.33045	2.57446	1.73113	2.21384	1.61669	2.16651	24.2982	2.24737	5.25494	1.81436		1625.44	28.1015	0.194216	1147.88	3806.77	6.77555	399.394	213.4	14.4241	83.6364	0.651115	64.2424	55.1252	927.273	108.152	0.688948	206.667	1625.44	3806.77	213.4	0.651115
100784-20-1	HALOSULFURON-METHYL	Herbicide	Other pesticide class	0.000649	1068.02	2.51189	0.4	1.06287e-08	4.2878e-12	0.998806								1.04369	0.976943	1.05653	0.948481	1.04834	2.50219e+08	3.09402	1.0532	1.39665	1.15358		3629.43	6754.76	0.5118	1147.88	6237.41	15.8148	399.394	329.09	1.2489e-07	83.6364	5.11338	64.2424	117.629	927.273	406.925	1.08358	206.667	3629.43	6237.41	329.09	5.11338
101-05-3	ANILAZINE	Fungicide	Other pesticide class	2.62	0.26456	7585.78	3.88	2.8381e-05	1.14494e-08	0.999879		Physiological variables	Symbol	Unit	Value			5.32467	10.129	3.30088	347.514	2.93919	3.081e+07	73.6392	5.02616	14.233	2.08738		711.406	1.67322	0.0493635	1147.88	1996.44	0.0431638	399.394	117.379	1.01428e-06	83.6364	0.214843	64.2424	24.6484	927.273	39.9307	0.598837	206.667	711.406	1996.44	117.379	0.214843
101200-48-0	Tribenuron-methyl	Herbicide	Other pesticide class	0.00398	174.158	354.813	2.55	1.0302e-08	4.15601e-12	0.999951		Food intake rate	IRFood	kg day-1	2.1			4.68701	7.7278	2.96659	17.0491	2.65755	4.18943e+09	63.1315	4.43438	12.321	2.05924		808.191	1101.47	0.0647015	1147.88	2221.41	0.87981	399.394	129.819	7.45926e-09	83.6364	0.250602	64.2424	27.9378	927.273	46.1272	0.607022	206.667	808.191	2221.41	129.819	0.250602
101205-02-1	Cycloxydim	Herbicide	Other pesticide class	0.555	1.24891	7585.78	3.88	8.13675e-05	3.28251e-08	0.999879		Exhalation rate	ERExhalation	kg day-1	25			5.32467	10.129	3.30088	347.514	2.93919	1.07465e+07	73.6392	5.02616	14.233	2.08738		711.406	7.89881	0.0493635	1147.88	1996.44	0.0431638	399.394	117.379	2.90792e-06	83.6364	0.214843	64.2424	24.6484	927.273	39.9307	0.598837	206.667	711.406	1996.44	117.379	0.214843
101-21-3	CHLORPROPHAM	Herbicide, Plant growth regulator	Carbamate	0.34	2.03867	3235.94	3.51	0.057469	2.3184e-05	0.999926		Urine excretion rate	ERUrine	kg day-1	3			5.27611	9.92046	3.27543	148.72	2.91775	6514.27	72.8391	4.9811	14.0874	2.08548		717.953	12.8936	0.0504009	1147.88	2011.95	0.10086	399.394	118.242	0.00479716	83.6364	0.217203	64.2424	24.8714	927.273	40.3434	0.599382	206.667	717.953	2011.95	118.242	0.217203
101-27-9	BARBAN	Herbicide	Carbamate	0.314	2.20748	2570.4	3.41	0.0011817	4.76719e-07	0.999933		Bile excretion rate	ERBile	kg day-1	0.5			5.25454	9.82933	3.26412	118.304	2.90821	252060	72.4836	4.96107	14.0227	2.08463		720.901	13.9613	0.0508682	1147.88	2018.92	0.126792	399.394	118.629	0.000123979	83.6364	0.218269	64.2424	24.9718	927.273	40.5295	0.599628	206.667	720.901	2018.92	118.629	0.218269
101-42-8	FENURON	Herbicide	Other pesticide class	0.00757	91.565	9.54993	0.98	0.00020301	8.18979e-08	0.999658		Milk excretion rate	ERMilk	kg day-1	1.5			1.46425	1.44259	1.27701	1.27013	1.2341	17085.8	10.0243	1.4435	2.65768	1.50865		2586.99	579.107	0.346599	1147.88	5160.48	11.8098	399.394	279.556	0.00182901	83.6364	1.57825	64.2424	85.824	927.273	213.845	0.828553	206.667	2586.99	5160.48	279.556	1.57825
1014-69-3	DESMETRYNE	Herbicide	Other pesticide class	0.0702	9.87389	239.883	2.38	4.8783e-05	1.96799e-08	0.999948		Body mass	---	kg	70			4.43083	6.93418	2.83228	11.7967	2.5444	613888	58.91	4.19664	11.5529	2.04558		854.918	62.4479	0.0721066	1147.88	2326.75	1.27155	399.394	135.592	5.0905e-05	83.6364	0.268561	64.2424	29.5205	927.273	49.1941	0.611072	206.667	854.918	2326.75	135.592	0.268561
1014-70-6	SIMETRYN	Herbicide	Other pesticide class	0.0933	7.42923	630.957	2.8	4.4743e-05	1.80501e-08	0.999951		Blood mass	Mblood	kg	3.3			4.95552	8.65624	3.10735	29.6693	2.77614	1.67411e+06	67.5561	4.68357	13.1261	2.07199		764.401	46.9865	0.0577618	1147.88	2120.78	0.505574	399.394	124.273	1.86667e-05	83.6364	0.234189	64.2424	26.4514	927.273	43.2979	0.603284	206.667	764.401	2120.78	124.273	0.234189
101-77-9	4,4'-Methylenedianiline	Otehr product constituent	Other pesticide class	0.096	7.22028	38.9045	1.59	5.47225e-05	2.2076e-08	0.999888		Liver mass	Mliver	kg	1			2.59011	2.96927	1.86726	2.61167	1.73138	125052	28.5771	2.48835	6.03353	1.86424		1462.49	45.665	0.168391	1147.88	3529.24	5.74345	399.394	199.263	0.000249897	83.6364	0.553621	64.2424	49.7866	927.273	94.1958	0.670513	206.667	1462.49	3529.24	199.263	0.553621
101-79-1	Benzenamine, 4-(4-chlorophenoxy)-	Metabolite	Other pesticide class	2.27	0.305351	6025.6	3.78	0.0354548	1.43031e-05	0.999896		Kidney mass	Mkidney	kg	0.2			5.31523	10.0881	3.29594	276.211	2.93502	19604.2	73.4837	5.0174	14.2047	2.08701		712.669	1.93121	0.0495636	1147.88	1999.43	0.0543062	399.394	117.546	0.00159405	83.6364	0.215298	64.2424	24.6914	927.273	40.0102	0.598942	206.667	712.669	1999.43	117.546	0.215298
10222-01-2	2,2-DIBROMO-2-CYANOACETAMIDE	Microbiocide, Fungicide, Algicide	Other pesticide class	0.00798	86.8605	6.60693	0.82	0.0019291	7.78233e-07	0.999523		Lung mass	Mlung	kg	0.8			1.29878	1.25366	1.19026	1.13563	1.16101	1622.66	7.29759	1.28993	2.16153	1.39917		2916.59	549.353	0.398831	1147.88	5536.59	13.2085	399.394	297.154	0.0192586	83.6364	2.16796	64.2424	96.0412	927.273	262.931	0.893388	206.667	2916.59	5536.59	297.154	2.16796
1024-57-3	Heptachlor epoxide	Metabolite	Other pesticide class	33.7	0.0205682	95499.3	4.98	2.121	0.000855649	0.998904		Fat mass	Mfat	kg	13.4			5.35854	10.2773	3.31864	4365.28	2.95415	5177.18	74.1974	5.05759	14.3346	2.08868		706.909	0.130084	0.0486508	1147.88	1985.75	0.00343621	399.394	116.785	0.00603611	83.6364	0.213227	64.2424	24.4952	927.273	39.6478	0.598463	206.667	706.909	1985.75	116.785	0.213227
10265-92-6	METHAMIDPHOS	Insecticide, Acaricide, Metabolite	Organophosphate	0.0222	31.2228	0.158489	-0.8	6.64252e-07	2.67971e-10	0.981935		Muscle mass	Mmuscle	kg	24.7			0.882053	0.810108	0.971789	0.840927	0.976952	3.59647e+06	0.430465	0.90319	0.911995	0.91293		4294.53	197.47	0.617201	1147.88	6781.31	17.8374	399.394	353.139	8.68907e-06	83.6364	36.7531	64.2424	137.166	927.273	623.176	1.36922	206.667	4294.53	6781.31	353.139	36.7531
102851-06-9	tau-Fluvalinate	Insecticide, Acaricide, Veterinary treatment	Pyrethroid	1.88	0.368695	6.45654e+06	6.81	0.270906	0.000109288	0.933093		Mammary gland mass	MMammary gland	kg	1.2			5.36144	10.2902	3.32016	295073	2.95543	2.73982e+06	74.2452	5.06028	14.3433	2.08879		706.526	2.33183	0.0485901	1147.88	1984.84	5.08348e-05	399.394	116.734	1.14058e-05	83.6364	0.21309	64.2424	24.4821	927.273	39.6237	0.598431	206.667	706.526	1984.84	116.734	0.21309
1031-07-8	ENDOSULFAN SULFATE	Metabolite	Other pesticide class	4.34	0.159711	4570.88	3.66	0.032825	1.32422e-05	0.999912		Blood flow rate of liver	QBlood⇔Liver	kg day-1	3788			5.30071	10.0255	3.28832	209.729	2.92861	16080.2	73.2444	5.00392	14.1612	2.08645		714.621	1.0101	0.049873	1147.88	2004.06	0.0715208	399.394	117.803	0.00194339	83.6364	0.216001	64.2424	24.7579	927.273	40.1333	0.599104	206.667	714.621	2004.06	117.803	0.216001
103112-35-2	FENCHLORAZOLE-ETHYL	Herbicide safener	Other pesticide class	3.63	0.19095	33113.1	4.52	0.00039794	1.60536e-07	0.999596		Blood flow rate of kidney	QBlood⇔Kidney	kg day-1	1318			5.353	10.2529	3.31574	1514.15	2.9517	9.57178e+06	74.1061	5.05245	14.3179	2.08847		707.641	1.20767	0.0487668	1147.88	1987.49	0.00990657	399.394	116.882	3.2648e-06	83.6364	0.21349	64.2424	24.5201	927.273	39.6938	0.598524	206.667	707.641	1987.49	116.882	0.21349
10311-84-9	DIALIFOR	Insecticide, Acaricide	Organophosphate	9.12	0.076003	48977.9	4.69	0.017978	7.25265e-06	0.99942		Blood flow rate of lung	QBlood⇔Lung	kg day-1	276			5.35574	10.265	3.31718	2239.19	2.95292	313315	74.1513	5.055	14.3262	2.08858		707.278	0.480684	0.0487093	1147.88	1986.63	0.00669886	399.394	116.834	9.97398e-05	83.6364	0.21336	64.2424	24.5078	927.273	39.671	0.598494	206.667	707.278	1986.63	116.834	0.21336
103-33-3	AZOBENZENE	Acaricide, Ovicide, Miticide	Other pesticide class	0.591	1.17284	6606.93	3.82	1.3635	0.00055006	0.999889		Blood flow rate of fat	QBlood⇔Fat	kg day-1	212			5.31926	10.1055	3.29805	302.779	2.9368	558.777	73.5502	5.02114	14.2168	2.08717		712.129	7.41766	0.049478	1147.88	1998.15	0.049541	399.394	117.475	0.0559257	83.6364	0.215103	64.2424	24.673	927.273	39.9762	0.598897	206.667	712.129	1998.15	117.475	0.215103
103361-09-7	Flumioxazin	Herbicide	Other pesticide class	0.507	1.36715	354.813	2.55	0.063428	2.5588e-05	0.999951		Blood flow rate of muscle	QBlood⇔Muscle	kg day-1	3060			4.68701	7.7278	2.96659	17.0491	2.65755	680.448	63.1315	4.43438	12.321	2.05924		808.191	8.64663	0.0647015	1147.88	2221.41	0.87981	399.394	129.819	0.0459256	83.6364	0.250602	64.2424	27.9378	927.273	46.1272	0.607022	206.667	808.191	2221.41	129.819	0.250602
104-40-5	P-NONYLPHENOL	Adjuvant, Other product constituent	Other pesticide class	1.33	0.521163	575440	5.76	3.434	0.00138534	0.993617		Blood flow rate of mammary gland	QBlood⇔Mammary gland	kg day-1	682			5.361	10.2882	3.31993	26299.2	2.95524	19264.4	74.2379	5.05987	14.3419	2.08878		706.585	3.29612	0.0485995	1147.88	1984.98	0.000570359	399.394	116.742	0.00162216	83.6364	0.213111	64.2424	24.4842	927.273	39.6274	0.598436	206.667	706.585	1984.98	116.742	0.213111
104-46-1	ANETHOLE	Insecticide, Miticide, Other, Repellent	Botanical insecticide	2.4	0.288811	2454.71	3.39	12.5511	0.00506335	0.999935								5.24962	9.80871	3.26154	113.017	2.90604	22.6721	72.4026	4.95651	14.008	2.08443		721.576	1.8266	0.0509751	1147.88	2020.52	0.132723	399.394	118.718	1.37835	83.6364	0.218513	64.2424	24.9947	927.273	40.5721	0.599684	206.667	721.576	2020.52	118.718	0.218513
10453-86-8	RESMETHRIN	Insecticide	Pyrethroid	0.323	2.14597	1.38038e+06	6.14	0.013433	5.41911e-06	0.984873								5.36128	10.2894	3.32008	63086.2	2.95536	1.18134e+07	74.2426	5.06014	14.3428	2.08879		706.548	13.5723	0.0485935	1147.88	1984.89	0.00023777	399.394	116.737	2.64531e-06	83.6364	0.213097	64.2424	24.4829	927.273	39.6251	0.598433	206.667	706.548	1984.89	116.737	0.213097
105512-06-9	CLODINAFOP-PROPARGYL	Herbicide	Other pesticide class	0.0734	9.44342	7943.28	3.9	0.00027876	1.12457e-07	0.999875								5.32631	10.1361	3.30174	363.852	2.93992	3.28425e+06	73.6663	5.02768	14.2379	2.08744		711.186	59.7253	0.0493287	1147.88	1995.91	0.0412255	399.394	117.35	9.51512e-06	83.6364	0.214764	64.2424	24.6409	927.273	39.9169	0.598819	206.667	711.186	1995.91	117.35	0.214764
10552-74-6	Nitrothal-isopropyl	Fungicide	Other pesticide class	0.014	49.5105	1995.26	3.3	0.567248	0.000228838	0.99994								5.22465	9.70465	3.24845	92.0198	2.89501	408.538	71.991	4.93333	13.9331	2.08343		725.025	313.131	0.0515217	1147.88	2028.66	0.163008	399.394	119.17	0.0764923	83.6364	0.219762	64.2424	25.1122	927.273	40.7902	0.599972	206.667	725.025	2028.66	119.17	0.219762
105-67-9	2,4-dimethylphenol	Fungicide, Microbiocide, Disinfectant, Bactericide, Other product constituent	Other pesticide class	0.0865	8.01326	199.526	2.3	0.096051	3.87487e-05	0.999946								4.28761	6.52466	2.75719	9.9523	2.48114	263.484	56.5498	4.06372	11.1234	2.03722		883.476	50.6802	0.0766323	1147.88	2390.11	1.50719	399.394	139.049	0.118603	83.6364	0.279769	64.2424	30.486	927.273	51.0934	0.613581	206.667	883.476	2390.11	139.049	0.279769
10605-21-7	CARBENDAZIM	Fungicide, Metabolite	Imidazole	0.0249	27.8372	33.1131	1.52	2.1412e-06	8.63798e-10	0.999875								2.42261	2.71126	1.77944	2.347	1.65739	2.885e+06	25.8169	2.3329	5.53129	1.83335		1563.6	176.058	0.184416	1147.88	3703.4	6.39114	399.394	208.158	1.08319e-05	83.6364	0.612811	64.2424	53.1041	927.273	102.749	0.68181	206.667	1563.6	3703.4	208.158	0.612811
106-24-1	GERANIOL	Fungicide, Insect attractant/repellent, Veterinary treatment	Botanical insecticide	1.2	0.577623	3630.78	3.56	1.1615	0.00046857	0.999922								5.28524	9.95928	3.28021	166.765	2.92178	361.394	72.9895	4.98957	14.1148	2.08584		716.713	3.6532	0.0502044	1147.88	2009.02	0.0899468	399.394	118.079	0.0864708	83.6364	0.216756	64.2424	24.8291	927.273	40.2651	0.599279	206.667	716.713	2009.02	118.079	0.216756
106325-08-0	BAS 480F	Fungicide	Triazole	5	0.138629	2754.23	3.44	0.0018635	7.51769e-07	0.999931								5.26152	9.8587	3.26778	126.706	2.9113	171179	72.5986	4.96755	14.0436	2.0849		719.945	0.876768	0.0507166	1147.88	2016.66	0.118385	399.394	118.504	0.000182558	83.6364	0.217923	64.2424	24.9392	927.273	40.4691	0.599548	206.667	719.945	2016.66	118.504	0.217923
106-89-8	Epichlorohydrin	Fungicide, Insecticide, Microbiocide, Other product constituent	Organochlorine	0.0683	10.1486	2.81838	0.45	3.0704	0.00123865	0.998932								1.06389	0.99824	1.06712	0.962488	1.05726	0.877651	3.42683	1.07194	1.45721	1.17786		3560.54	64.1851	0.500882	1147.88	6175.52	15.5846	399.394	326.314	35.6064	83.6364	4.61677	64.2424	115.572	927.273	390.014	1.06125	206.667	3560.54	6175.52	326.314	4.61677
106-93-4	Ethylene dibromide	Insecticide, Fumigant	Other pesticide class	0.151	4.59038	91.2011	1.96	65.65	0.0264844	0.99993								3.53179	4.69065	2.36095	5.00169	2.1473	0.195812	44.0949	3.36228	8.85713	1.98146		1072.54	29.0321	0.106595	1147.88	2791.25	2.99898	399.394	160.667	159.592	83.6364	0.358792	64.2424	36.846	927.273	64.1668	0.630849	206.667	1072.54	2791.25	160.667	0.358792
106-99-0	1,3-butadiene	Other product constituent	Other pesticide class	0.338	2.05073	97.7237	1.99	7433.6	2.99885	0.999932								3.60618	4.85019	2.39995	5.29979	2.18016	0.00183019	45.3207	3.43132	9.08018	1.98802		1050.42	12.9699	0.103089	1147.88	2745.9	2.8303	399.394	158.245	17074.7	83.6364	0.349088	64.2424	36.1047	927.273	62.5905	0.628767	206.667	1050.42	2745.9	158.245	0.349088
107-02-8	Acrolein	Herbicide	Other pesticide class	0.0723	9.5871	0.977237	-0.01	12.322	0.00497092	0.996994								0.939641	0.868824	1.00198	0.878345	1.00239	0.201516	1.37945	0.956634	1.08467	1.00955		4031.33	60.634	0.575491	1147.88	6576.98	17.0776	399.394	344.178	155.074	83.6364	11.469	64.2424	129.503	927.273	523.968	1.23818	206.667	4031.33	6576.98	344.178	11.469
1071-83-6	Glyphosate	Herbicide	Other pesticide class	0.0025	277.259	0.000398107	-3.4	2.121e-07	8.55649e-11	0.120342								0.87076	0.798687	0.965869	0.833702	0.971964	1.11777e+07	0.244372	0.892709	0.878134	0.892246		4350.22	1753.54	0.626028	1147.88	6822.87	17.992	399.394	354.951	2.79575e-06	83.6364	64.741	64.2424	138.776	927.273	647.206	1.40096	206.667	4350.22	6822.87	354.951	64.741
107-21-1	Ethylene glycol	Other product constituent	Other pesticide class	0.00647	107.132	0.0436516	-1.36	0.00606	2.44471e-06	0.93747								0.873856	0.801814	0.967491	0.835679	0.973331	392.04	0.29538	0.895582	0.887416	0.897977		4334.81	677.564	0.623586	1147.88	6811.43	17.9495	399.394	354.453	0.0797113	83.6364	53.5612	64.2424	138.331	927.273	640.437	1.39202	206.667	4334.81	6811.43	354.453	53.5612
107-41-5	2-METHYL-2,4-PENTANEDIOL	Other product constituent	Other pesticide class	0.0352	19.6917	3.80189	0.58	0.000204845	8.26383e-08	0.999198								1.12744	1.06593	1.10043	1.00744	1.08533	13706.9	4.47406	1.13092	1.64776	1.24791		3359.84	124.541	0.469076	1147.88	5988.55	14.8893	399.394	317.875	0.00227987	83.6364	3.53614	64.2424	109.545	927.273	344.912	1.00167	206.667	3359.84	5988.55	317.875	3.53614
107-49-3	TETRAETHYL PYROPHOSPHATE	Insecticide, Acaricide	Organophosphate	0.00535	129.56	2.81838	0.45	1.01e-05	4.07452e-09	0.998932								1.06389	0.99824	1.06712	0.962488	1.05726	266806	3.42683	1.07194	1.45721	1.17786		3560.54	819.409	0.500882	1147.88	6175.52	15.5846	399.394	326.314	0.000117126	83.6364	4.61677	64.2424	115.572	927.273	390.014	1.06125	206.667	3560.54	6175.52	326.314	4.61677
107534-96-3	TEBUCONAZOLE	Fungicide, Plant growth regulator	Triazole	5.13	0.135116	5011.87	3.7	1.4645e-05	5.90806e-09	0.999907								5.30599	10.0482	3.29109	229.883	2.93094	3.95034e+07	73.3315	5.00882	14.177	2.08665		713.91	0.85455	0.0497603	1147.88	2002.37	0.0652506	399.394	117.71	7.91072e-07	83.6364	0.215745	64.2424	24.7337	927.273	40.0884	0.599045	206.667	713.91	2002.37	117.71	0.215745
108-10-1	Methyl isobutyl ketone	Other product constituent	Other pesticide class	0.0993	6.98033	20.4174	1.31	13.938	0.00562284	0.99982								1.97376	2.0767	1.54413	1.76679	1.45914	0.338491	18.4204	1.91634	4.18542	1.72306		1919.18	44.1474	0.240767	1147.88	4267.78	8.48999	399.394	236.44	92.3215	83.6364	0.858881	64.2424	64.6474	927.273	135.789	0.725451	206.667	1919.18	4267.78	236.44	0.858881
108-44-1	M-TOLUIDINE	Metabolite	Other pesticide class	0.114	6.08024	25.1189	1.4	0.16766	6.7637e-05	0.999847								2.1551	2.3237	1.6392	1.98165	1.53924	31.3633	21.4088	2.08464	4.72919	1.77348		1757.69	38.4547	0.215174	1147.88	4020.25	7.56945	399.394	224.137	0.996389	83.6364	0.738991	64.2424	59.4282	927.273	120.176	0.704829	206.667	1757.69	4020.25	224.137	0.738991
1085-98-9	DICHLOFLUANID	Fungicide	Other pesticide class	1.72	0.402993	5011.87	3.7	0.0038178	1.54017e-06	0.999907								5.30599	10.0482	3.29109	229.883	2.93094	151534	73.3315	5.00882	14.177	2.08665		713.91	2.54874	0.0497603	1147.88	2002.37	0.0652506	399.394	117.71	0.000206224	83.6364	0.215745	64.2424	24.7337	927.273	40.0884	0.599045	206.667	713.91	2002.37	117.71	0.215745
108-62-3	Metaldehyde (tetramer)	Molluscicide	Other pesticide class	0.108	6.41803	1.31826	0.12	0.0713307	2.87761e-05	0.997761								0.963193	0.893066	1.01433	0.89393	1.01279	35.3605	1.76755	0.978492	1.15529	1.04526		3932.75	40.5911	0.559869	1147.88	6496.91	16.7798	399.394	340.643	0.883755	83.6364	8.95074	64.2424	126.61	927.273	491.94	1.19588	206.667	3932.75	6496.91	340.643	8.95074
108-78-1	Melamine	Metabolite	Other pesticide class	0.000691	1003.11	0.042658	-1.37	1.8584e-09	7.49712e-13	0.936107								0.873785	0.801742	0.967454	0.835634	0.9733	1.27833e+09	0.294209	0.895516	0.887203	0.897846		4335.16	6344.2	0.623642	1147.88	6811.69	17.9504	399.394	354.464	2.4446e-08	83.6364	53.7743	64.2424	138.341	927.273	640.59	1.39222	206.667	4335.16	6811.69	354.464	53.7743
108-94-1	cyclohexanone	Other product constituent	Other pesticide class	0.0577	12.0129	6.45654	0.81	0.909	0.000366707	0.999513								1.28994	1.24379	1.18563	1.12876	1.15711	3.42462	7.15202	1.28173	2.13504	1.39245		2936.56	75.9764	0.401997	1147.88	5558.22	13.289	399.394	298.156	9.12511	83.6364	2.21209	64.2424	96.6555	927.273	266.193	0.897696	206.667	2936.56	5558.22	298.156	2.21209
109-79-5	BUTANETHIOL	Repellent, Other product constituent	Other pesticide class	0.192	3.61014	190.546	2.28	458.54	0.184983	0.999946								4.24953	6.41956	2.73723	9.54189	2.46432	0.052941	55.9223	4.02838	11.0092	2.0349		891.392	22.8325	0.0778869	1147.88	2407.54	1.57202	399.394	139.998	590.279	83.6364	0.282908	64.2424	30.7535	927.273	51.6233	0.614281	206.667	891.392	2407.54	139.998	0.282908
109-86-4	2-Methoxyethanol	Other product constituent	Other pesticide class	0.0174	39.836	0.169824	-0.77	0.03333	1.34459e-05	0.983118								0.882861	0.810926	0.972212	0.841445	0.977308	71.7151	0.443771	0.903939	0.914417	0.914385		4290.6	251.945	0.616579	1147.88	6778.35	17.8265	399.394	353.01	0.435752	83.6364	35.651	64.2424	137.052	927.273	621.526	1.36704	206.667	4290.6	6778.35	353.01	35.651
110-17-8	FUMARIC ACID	Other product constituent	Other pesticide class	0.184	3.7671	2.88403	0.46	0.000340472	1.37352e-07	0.998955								1.06819	1.00279	1.06937	0.965488	1.05916	7936.88	3.49771	1.07593	1.47011	1.1829		3546.2	23.8252	0.498609	1147.88	6162.5	15.5362	399.394	325.729	0.00393731	83.6364	4.52322	64.2424	115.144	927.273	386.593	1.05673	206.667	3546.2	6162.5	325.729	4.52322
110-27-0	ISOPROPYL MYRISTATE	Other product constituent	Other pesticide class	1.21	0.572849	1.47911e+07	7.17	249.02	0.100459	0.858946								5.36147	10.2903	3.32018	675973	2.95544	6828.2	74.2456	5.06031	14.3433	2.0888		706.523	3.62301	0.0485896	1147.88	1984.83	2.21902e-05	399.394	116.734	0.00457661	83.6364	0.213089	64.2424	24.482	927.273	39.6235	0.598431	206.667	706.523	1984.83	116.734	0.213089
110488-70-5	DIMETHOMORPH	Fungicide	Morpholine	0.787	0.880746	478.63	2.68	2.0301e-05	8.18979e-09	0.999952								4.84128	8.24807	3.04746	22.7077	2.72569	2.82711e+06	65.6736	4.57755	12.7836	2.06674		782.438	5.57032	0.0606202	1147.88	2162.46	0.660568	399.394	126.574	1.10537e-05	83.6364	0.240902	64.2424	27.064	927.273	44.4581	0.604817	206.667	782.438	2162.46	126.574	0.240902
110-96-3	DIISOBUTYLAMINE	Metabolite	Other pesticide class	0.982	0.705853	426.58	2.63	56.762	0.0228988	0.999952								4.78594	8.0575	3.01845	20.3289	2.70124	0.905704	64.7617	4.52619	12.6176	2.06411		791.485	4.4642	0.062054	1147.88	2183.24	0.737865	399.394	127.719	34.5035	83.6364	0.244294	64.2424	27.3711	927.273	45.0428	0.605589	206.667	791.485	2183.24	127.719	0.244294
1113-02-6	DIMETHOXON	Insecticide, Acaricide, Metabolite	Organophosphate	0.00178	389.409	0.18197	-0.74	7.04948e-07	2.84389e-10	0.984224								0.883726	0.811802	0.972666	0.842	0.97769	3.39268e+06	0.458025	0.904742	0.91701	0.915941		4286.4	2462.83	0.615913	1147.88	6775.19	17.8147	399.394	352.872	9.21102e-06	83.6364	34.5416	64.2424	136.93	927.273	619.768	1.36472	206.667	4286.4	6775.19	352.872	34.5416
111-30-8	PENTANE-1,5-DIAL	Fungicide, Bactericide, Other product consitituent	Other pesticide class	0.052	13.3298	0.660693	-0.18	0.0479043	1.93255e-05	0.995578								0.917553	0.84621	0.9904	0.863879	0.992632	51.0746	1.01546	0.936135	1.01844	0.974137		4128.37	84.3046	0.59087	1147.88	6653.88	17.3635	399.394	347.561	0.61185	83.6364	15.58	64.2424	132.338	927.273	558.043	1.28319	206.667	4128.37	6653.88	347.561	15.58
11141-17-6	Azadirachtin	Insecticide, Fungicide	Botanical insecticide	0.00473	146.543	12.3027	1.09	9.9485e-09	4.0134e-12	0.999727								1.60727	1.61229	1.35199	1.39593	1.29727	3.80463e+08	12.3811	1.57623	3.08653	1.58367		2356.79	926.816	0.310117	1147.88	4874.29	10.7455	399.394	265.943	8.21367e-08	83.6364	1.27782	64.2424	78.597	927.273	184.134	0.789308	206.667	2356.79	4874.29	265.943	1.27782
1114-71-2	PEBULATE	Herbicide	Other pesticide class	0.181	3.82954	6760.83	3.83	23.937	0.00965661	0.999888								5.32022	10.1096	3.29855	309.813	2.93722	32.5682	73.5659	5.02202	14.2196	2.08721		712.001	24.2201	0.0494578	1147.88	1997.85	0.0484164	399.394	117.458	0.959526	83.6364	0.215058	64.2424	24.6687	927.273	39.9682	0.598886	206.667	712.001	1997.85	117.458	0.215058
111479-05-1	PROPAQUIZAFOP	Herbicide	Other pesticide class	0.228	3.04012	39810.7	4.6	3.0906e-07	1.2468e-10	0.999521								5.35442	10.2592	3.31648	1820.24	2.95233	1.48157e+10	74.1296	5.05377	14.3222	2.08853		707.453	19.2274	0.0487369	1147.88	1987.04	0.00824069	399.394	116.857	2.10925e-09	83.6364	0.213422	64.2424	24.5137	927.273	39.682	0.598508	206.667	707.453	1987.04	116.857	0.213422
111-76-2	Ethylene glycol, monobutyl ether	Other product constituent	Other pesticide class	0.0537	12.9078	6.76083	0.83	0.1616	6.51923e-05	0.999533								1.30778	1.26374	1.19498	1.14266	1.16499	19.4799	7.4459	1.29828	2.18852	1.40591		2896.51	81.6357	0.39565	1147.88	5514.73	13.1272	399.394	296.14	1.60422	83.6364	2.12478	64.2424	95.4233	927.273	259.689	0.889105	206.667	2896.51	5514.73	296.14	2.12478
111-92-2	DIBUTYLAMINE	Metabolite	Other pesticide class	1.29	0.537323	676.083	2.83	8.989	0.00362632	0.999951								4.98031	8.74758	3.12035	31.7316	2.78709	8.91001	67.9647	4.70658	13.2005	2.0731		760.595	3.39833	0.0571587	1147.88	2111.94	0.472715	399.394	123.785	3.50729	83.6364	0.232781	64.2424	26.322	927.273	43.0541	0.602962	206.667	760.595	2111.94	123.785	0.232781
111991-09-4	Nicosulfuron	Herbicide	Other pesticide class	0.00037	1873.37	1.02329	0.01	9.02902e-12	3.64247e-15	0.997128								0.942837	0.872105	1.00366	0.88045	1.0038	2.75598e+11	1.4321	0.9596	1.09425	1.01451		4017.66	11848.2	0.573325	1147.88	6566	17.0367	399.394	343.694	1.1339e-10	83.6364	11.0473	64.2424	129.102	927.273	519.38	1.23212	206.667	4017.66	6566	343.694	11.0473
112-05-0	NONANOIC ACID	Herbicide, Plant growth regulator, Adjuvant	Botanical insecticide	0.865	0.801326	2630.27	3.42	0.16362	6.60072e-05	0.999933								5.25691	9.83933	3.26536	121.04	2.90927	1862.5	72.5227	4.96328	14.0298	2.08472		720.575	5.06802	0.0508165	1147.88	2018.15	0.123926	399.394	118.587	0.0167786	83.6364	0.218151	64.2424	24.9606	927.273	40.5089	0.599601	206.667	720.575	2018.15	118.587	0.218151
112-12-9	UNDECANONE	Repellent, Sterilant	Other pesticide class	0.662	1.04705	12302.7	4.09	6.4236	0.0025914	0.999826								5.33871	10.1902	3.30825	563.083	2.94539	220.541	73.8707	5.03919	14.2751	2.08792		709.535	6.62211	0.0490669	1147.88	1991.99	0.0266391	399.394	117.132	0.141697	83.6364	0.21417	64.2424	24.5846	927.273	39.8129	0.598681	206.667	709.535	1991.99	117.132	0.21417
112226-61-6	HALOFENOZIDE	Insecticide	Other pesticide class	2.28	0.304012	1659.59	3.22	1.0623e-06	4.28551e-10	0.999943								5.19798	9.59486	3.23447	76.679	2.88323	1.81826e+08	71.5516	4.90858	13.8531	2.08235		728.745	1.92274	0.0521112	1147.88	2037.43	0.195621	399.394	119.657	1.71867e-07	83.6364	0.221112	64.2424	25.2388	927.273	41.0257	0.600283	206.667	728.745	2037.43	119.657	0.221112
112-30-1	1-DECANOL	Plant growth regulator, Other product constituent	Other pesticide class	0.789	0.878514	37153.5	4.57	3.232	0.00130385	0.999551								5.35392	10.2569	3.31622	1698.8	2.95211	1322.24	74.1212	5.0533	14.3207	2.08851		707.519	5.5562	0.0487475	1147.88	1987.2	0.00882977	399.394	116.866	0.0236342	83.6364	0.213446	64.2424	24.516	927.273	39.6861	0.598514	206.667	707.519	1987.2	116.866	0.213446
112410-23-8	TEBUFENOZIDE	Insecticide	Other pesticide class	3.8	0.182407	17782.8	4.25	0.0012726	5.1339e-07	0.999766								5.3457	10.2208	3.31191	813.531	2.94848	1.60824e+06	73.9859	5.04568	14.2961	2.08819		708.606	1.15364	0.0489198	1147.88	1989.79	0.0184381	399.394	117.009	1.94311e-05	83.6364	0.213837	64.2424	24.553	927.273	39.7545	0.598604	206.667	708.606	1989.79	117.009	0.213837
112-53-8	DODECANOL	Insecticide, Adjuvant, Other product constituent	Botanical insecticide	1.11	0.624457	134896	5.13	2.2422	0.000904544	0.998468								5.3594	10.2811	3.31909	6165.77	2.95453	6917.23	74.2116	5.05839	14.3371	2.08872		706.796	3.94941	0.0486328	1147.88	1985.48	0.00243278	399.394	116.77	0.0045177	83.6364	0.213186	64.2424	24.4913	927.273	39.6407	0.598454	206.667	706.796	1985.48	116.77	0.213186
1129-41-5	N-METHYL-M-TOLYLCARBAMATE	Insecticide, Acaricide	Carbamate	0.0574	12.0757	50.1187	1.7	0.0091203	3.67929e-06	0.999904								2.86557	3.42202	2.01167	3.12418	1.85304	891.671	33.1163	2.74399	6.85948	1.90685		1321.9	76.3735	0.146112	1147.88	3275.89	4.80127	399.394	186.18	0.0350466	83.6364	0.477738	64.2424	45.1484	927.273	82.8538	0.655532	206.667	1321.9	3275.89	186.18	0.477738
113136-77-9	Cyclanilide	Plant growth regulator	Other pesticide class	0.223	3.10828	63.0957	1.8	7.3831e-05	2.97847e-08	0.999916								3.12303	3.88071	2.14665	3.71724	1.96676	130353	37.3589	2.98292	7.63146	1.9396		1212.93	19.6585	0.128842	1147.88	3069.9	4.03525	399.394	175.416	0.000239733	83.6364	0.423484	64.2424	41.5319	927.273	74.4724	0.644461	206.667	1212.93	3069.9	175.416	0.423484
1134-23-2	CYCLOATE	Herbicide	Other pesticide class	0.229	3.02684	7585.78	3.88	0.6767	0.000272993	0.999879								5.32467	10.129	3.30088	347.514	2.93919	1292.18	73.6392	5.02616	14.233	2.08738		711.406	19.1434	0.0493635	1147.88	1996.44	0.0431638	399.394	117.379	0.0241839	83.6364	0.214843	64.2424	24.6484	927.273	39.9307	0.598837	206.667	711.406	1996.44	117.379	0.214843
114-26-1	Propoxur	Insecticide, Acaricide, Veterinary treatment	Carbamate	0.0536	12.9319	33.1131	1.52	0.00014443	5.82656e-08	0.999875								2.42261	2.71126	1.77944	2.347	1.65739	42770.7	25.8169	2.3329	5.53129	1.83335		1563.6	81.7881	0.184416	1147.88	3703.4	6.39114	399.394	208.158	0.000730641	83.6364	0.612811	64.2424	53.1041	927.273	102.749	0.68181	206.667	1563.6	3703.4	208.158	0.612811
114311-32-9	Imazamox	Herbicide	Other pesticide class	0.00118	587.413	5.37032	0.73	1.1632e-10	4.69256e-14	0.999422								1.22498	1.17185	1.15157	1.07911	1.12842	2.56887e+10	6.0815	1.22144	1.94025	1.33977		3092.29	3715.12	0.426676	1147.88	5722.61	13.9003	399.394	305.738	1.21649e-09	83.6364	2.60148	64.2424	101.426	927.273	292.917	0.932995	206.667	3092.29	5722.61	305.738	2.60148
114369-43-6	Fenbuconazole	Fungicide	Triazole	3.23	0.214597	1698.24	3.23	0.0083931	3.38593e-06	0.999943								5.20157	9.60956	3.23635	78.4457	2.88482	23542.9	71.6107	4.91191	13.8639	2.0825		728.242	1.35723	0.0520315	1147.88	2036.25	0.191215	399.394	119.592	0.00132736	83.6364	0.220929	64.2424	25.2217	927.273	40.9938	0.600241	206.667	728.242	2036.25	119.592	0.220929
115-29-7	Endosulfan	Insecticide, Acaricide	Organochlorine	5.39	0.128599	6760.83	3.83	6.565	0.00264844	0.999888								5.32022	10.1096	3.29855	309.813	2.93722	118.748	73.5659	5.02202	14.2196	2.08721		712.001	0.813328	0.0494578	1147.88	1997.85	0.0484164	399.394	117.458	0.263161	83.6364	0.215058	64.2424	24.6687	927.273	39.9682	0.598886	206.667	712.001	1997.85	117.458	0.215058
115-32-2	DICOFOL	Acaricide	Organochlorine	37.4	0.0185333	104713	5.02	0.024442	9.86034e-06	0.998802								5.3588	10.2785	3.31878	4786.35	2.95427	492594	74.2016	5.05783	14.3353	2.08869		706.875	0.117215	0.0486454	1147.88	1985.67	0.00313391	399.394	116.78	6.34397e-05	83.6364	0.213215	64.2424	24.494	927.273	39.6456	0.59846	206.667	706.875	1985.67	116.78	0.213215
115-90-2	FENSULFOTHION	Insecticide, Nematicide	Organophosphate	0.948	0.731168	169.824	2.23	0.0010201	4.11527e-07	0.999944								4.15044	6.15313	2.68528	8.59488	2.42055	21462.1	54.2895	3.93642	10.7121	2.02865		912.674	4.6243	0.0812595	1147.88	2454.12	1.74522	399.394	142.529	0.00145606	83.6364	0.291417	64.2424	31.4719	927.273	53.0551	0.616172	206.667	912.674	2454.12	142.529	0.291417
116-06-3	Aldicarb	Insecticide, Acaricide, Nematicide	Carbamate	0.065	10.6638	13.4896	1.13	0.00014544	5.86731e-08	0.999747								1.66575	1.68347	1.38265	1.45018	1.3231	26962.9	13.3448	1.6305	3.26188	1.61034		2274.05	67.4437	0.297005	1147.88	4766.2	10.3436	399.394	260.751	0.001159	83.6364	1.18555	64.2424	75.9808	927.273	174.235	0.776233	206.667	2274.05	4766.2	260.751	1.18555
116255-48-2	BROMUCONAZOLE	Fungicide	Triazole	4.52	0.153351	1737.8	3.24	3.0199e-05	1.21828e-08	0.999942								5.20508	9.62397	3.23819	80.2535	2.88637	6.69377e+06	71.6686	4.91517	13.8744	2.08264		727.75	0.969876	0.0519536	1147.88	2035.09	0.186908	399.394	119.527	4.66852e-06	83.6364	0.220751	64.2424	25.2049	927.273	40.9627	0.6002	206.667	727.75	2035.09	119.527	0.220751
116-29-0	TETRADIFON	Acaricide	Other pesticide class	16.6	0.0417559	40738	4.61	0.00014544	5.86731e-08	0.999511								5.35458	10.2599	3.31657	1862.62	2.9524	3.22163e+07	74.1322	5.05392	14.3227	2.08853		707.431	0.264087	0.0487336	1147.88	1986.99	0.00805319	399.394	116.854	9.70005e-07	83.6364	0.213415	64.2424	24.513	927.273	39.6806	0.598507	206.667	707.431	1986.99	116.854	0.213415
117-18-0	2,3,5,6-TETRACHLORONITROBENZENE	Fungicide, Plant growth regulator	Other pesticide class	2.94	0.235764	23988.3	4.38	29.9587	0.0120859	0.999697								5.34978	10.2387	3.31405	1097.13	2.95028	92.1278	74.053	5.04946	14.3083	2.08835		708.067	1.4911	0.0488343	1147.88	1988.51	0.013672	399.394	116.938	0.339203	83.6364	0.213643	64.2424	24.5346	927.273	39.7206	0.598559	206.667	708.067	1988.51	116.938	0.213643
117337-19-6	Fluthiacet-methyl	Herbicide	Other pesticide class	0.769	0.901362	5888.44	3.77	0.00020907	8.43426e-08	0.999897								5.31417	10.0834	3.29538	269.943	2.93455	3.24913e+06	73.4662	5.01641	14.2015	2.08697		712.812	5.7007	0.0495862	1147.88	1999.77	0.0555673	399.394	117.565	9.61797e-06	83.6364	0.215349	64.2424	24.6963	927.273	40.0192	0.598954	206.667	712.812	1999.77	117.565	0.215349
117718-60-2	Thiazopyr	Herbicide	Other pesticide class	0.0193	35.9144	7762.47	3.89	0.047369	1.91095e-05	0.999877								5.3255	10.1326	3.30132	355.589	2.93956	18888.5	73.6529	5.02693	14.2355	2.08741		711.295	227.142	0.0493459	1147.88	1996.17	0.0421835	399.394	117.365	0.00165444	83.6364	0.214803	64.2424	24.6446	927.273	39.9237	0.598828	206.667	711.295	1996.17	117.365	0.214803
117-80-6	DICHLONE	Fungicide, Algicide	Other pesticide class	1.55	0.447192	446.684	2.65	0.00416258	1.67926e-06	0.999952								4.80866	8.13517	3.03036	21.2477	2.71128	12905.6	65.136	4.54727	12.6858	2.0652		787.746	2.82828	0.0614615	1147.88	2174.66	0.705958	399.394	127.246	0.00242143	83.6364	0.24289	64.2424	27.2442	927.273	44.8009	0.60527	206.667	787.746	2174.66	127.246	0.24289
118-74-1	hexachlorobenzene	Fungicide, Metabolite	Other pesticide class	21.5	0.0322394	537032	5.73	171.7	0.0692669	0.994038								5.36096	10.288	3.31991	24543.9	2.95522	359.573	74.2373	5.05984	14.3418	2.08878		706.59	0.2039	0.0486002	1147.88	1984.99	0.00061115	399.394	116.743	0.0869088	83.6364	0.213112	64.2424	24.4843	927.273	39.6277	0.598437	206.667	706.59	1984.99	116.743	0.213112
118-75-2	CHLORANIL	Fungicide	Other pesticide class	0.395	1.7548	165.959	2.22	0.00029899	1.20618e-07	0.999944								4.12997	6.09931	2.67455	8.41822	2.41151	71738.4	53.9521	3.91742	10.6507	2.02732		917.198	11.0983	0.0819765	1147.88	2463.97	1.78185	399.394	143.064	0.000435611	83.6364	0.29324	64.2424	31.6246	927.273	53.3609	0.616576	206.667	917.198	2463.97	143.064	0.29324
119-12-0	PYRIDAPHENTHION	Insecticide	Organophosphate	0.644	1.07632	1584.89	3.2	4.9793e-06	2.00874e-09	0.999944								5.19057	9.56459	3.23058	73.2654	2.87996	3.70669e+07	71.4294	4.9017	13.8309	2.08205		729.786	6.8072	0.0522762	1147.88	2039.88	0.204735	399.394	119.793	8.4307e-07	83.6364	0.22149	64.2424	25.2742	927.273	41.0916	0.60037	206.667	729.786	2039.88	119.793	0.22149
119-38-0	ISOLAN	Insecticide, Fumigant	Carbamate	0.0629	11.0198	44.6684	1.65	2.81693e-05	1.1364e-08	0.999897								2.73887	3.20919	1.94525	2.87509	1.79708	266451	31.0286	2.62641	6.4796	1.88837		1383.05	69.6954	0.155803	1147.88	3387.74	5.21723	399.394	191.978	0.000117282	83.6364	0.509882	64.2424	47.1695	927.273	87.7112	0.661948	206.667	1383.05	3387.74	191.978	0.509882
119446-68-3	Difenoconazole	Fungicide	Triazole	21.2	0.0326956	19952.6	4.3	8.9991e-07	3.6304e-10	0.999742								5.34742	10.2283	3.31281	912.695	2.94924	2.55147e+09	74.0141	5.04727	14.3012	2.08826		708.38	0.206785	0.0488838	1147.88	1989.25	0.0164348	399.394	116.979	1.22479e-08	83.6364	0.213755	64.2424	24.5453	927.273	39.7403	0.598585	206.667	708.38	1989.25	116.979	0.213755
1194-65-6	2,6-DICHLOROBENZONITRILE	Herbicide, Metabolite	Other pesticide class	1.4	0.495105	549.541	2.74	1.0201	0.000411527	0.999952								4.90153	8.4608	3.07905	25.9484	2.7523	64.2535	66.6665	4.63346	12.9642	2.06954		772.82	3.13131	0.0590961	1147.88	2140.27	0.57807	399.394	125.35	0.486355	83.6364	0.237314	64.2424	26.7374	927.273	43.8386	0.603999	206.667	772.82	2140.27	125.35	0.237314
12002-53-8	Trimedlure	Pheromone, Insecticide	Other pesticide class	0.775	0.894383	39810.7	4.6	218773	88.2569	0.999521								5.35442	10.2592	3.31648	1820.24	2.95233	0.0209301	74.1296	5.05377	14.3222	2.08853		707.453	5.65657	0.0487369	1147.88	1987.04	0.00824069	399.394	116.857	1493.06	83.6364	0.213422	64.2424	24.5137	927.273	39.682	0.598508	206.667	707.453	1987.04	116.857	0.213422
120068-37-3	Fipronil	Insecticide, Veterinary treatment	Other pesticide class	3.77	0.183859	10000	4	8.5042e-05	3.43075e-08	0.999852								5.3335	10.1674	3.30551	457.847	2.94309	1.35457e+07	73.7848	5.03435	14.2595	2.08772		710.228	1.16282	0.0491767	1147.88	1993.64	0.032762	399.394	117.224	2.30701e-06	83.6364	0.21442	64.2424	24.6083	927.273	39.8565	0.598739	206.667	710.228	1993.64	117.224	0.21442
120-36-5	DICHLORPROP	Herbicide	Other pesticide class	1.14	0.608024	2691.53	3.43	4.1641e-05	1.67987e-08	0.999932								5.25924	9.84912	3.26658	123.84	2.91029	7.48745e+06	72.5611	4.96544	14.0368	2.08481		720.256	3.84547	0.050766	1147.88	2017.4	0.121124	399.394	118.545	4.17365e-06	83.6364	0.218036	64.2424	24.9498	927.273	40.4888	0.599574	206.667	720.256	2017.4	118.545	0.218036
120-51-4	BENZYL BENZOATE	Acaricide, Insecticide, Veterinary treatment, Other product constituent	Other pesticide class	0.044	15.7533	9332.54	3.97	0.411904	0.000166169	0.999859								5.33151	10.1587	3.30447	427.343	2.94221	2610.38	73.752	5.03251	14.2535	2.08764		710.493	99.6327	0.0492187	1147.88	1994.27	0.0351006	399.394	117.259	0.0119715	83.6364	0.214515	64.2424	24.6173	927.273	39.8732	0.598761	206.667	710.493	1994.27	117.259	0.214515
12071-83-9	(PROPYLENEBIS(DITHIOCARBAMATO))ZINC	Fungicide	Dithiocarbamate	0.0179	38.7233	114.815	2.06	7.14171e-06	2.88109e-09	0.999936								3.77518	5.22811	2.48855	6.0809	2.2548	2.18011e+06	48.1056	3.58815	9.58691	2.00193		1003.4	244.907	0.0956369	1147.88	2648.13	2.46674	399.394	153.007	1.43341e-05	83.6364	0.328879	64.2424	34.5266	927.273	59.2822	0.624397	206.667	1003.4	2648.13	153.007	0.328879
120-83-2	2,4-dichlorophenol	Metabolite	Other pesticide class	0.436	1.58979	1148.15	3.06	0.43329	0.000174797	0.999948								5.12892	9.31684	3.19826	53.3058	2.85273	310.094	70.4135	4.84449	13.646	2.0795		738.557	10.0547	0.0536663	1147.88	2060.5	0.281395	399.394	120.937	0.100776	83.6364	0.224685	64.2424	25.5727	927.273	41.6482	0.601105	206.667	738.557	2060.5	120.937	0.224685
120-93-4	2-Imidazolidinone	Metabolite	Other pesticide class	0.000899	771.02	0.18197	-0.74	0.00559618	2.2576e-06	0.984224								0.883726	0.811802	0.972666	0.842	0.97769	427.374	0.458025	0.904742	0.91701	0.915941		4286.4	4876.35	0.615913	1147.88	6775.19	17.8147	399.394	352.872	0.0731209	83.6364	34.5416	64.2424	136.93	927.273	619.768	1.36472	206.667	4286.4	6775.19	352.872	34.5416
12122-67-7	ZINEB	Fungicide	Dithiocarbamate	0.0223	31.0828	0.40738	-0.39	2.08092e-05	8.3948e-09	0.992871								0.899717	0.828035	0.98105	0.852302	0.984754	116178	0.72155	0.919583	0.964961	0.944082		4210.21	196.585	0.60384	1147.88	6717.29	17.5994	399.394	350.341	0.000268983	83.6364	21.9263	64.2424	134.72	927.273	588.97	1.32404	206.667	4210.21	6717.29	350.341	21.9263
1214-39-7	1H-PURIN-6-AMINE, N-(PHENYLMETHYL)-	Plant growth regulator	Botanical insecticide	0.00996	69.5931	37.1535	1.57	8.9284e-09	3.60188e-12	0.999884								2.54152	2.89314	1.84178	2.53165	1.70991	7.43901e+08	27.7764	2.44325	5.88783	1.85572		1490.45	440.145	0.172823	1147.88	3578.05	5.92499	399.394	201.765	4.20083e-08	83.6364	0.569581	64.2424	50.7056	927.273	96.5268	0.673592	206.667	1490.45	3578.05	201.765	0.569581
121552-61-2	CGA 219417 (CYPRODINIL)	Fungicide	Anilinopyrimidine	0.246	2.81767	10000	4	0.0084739	3.41852e-06	0.999852								5.3335	10.1674	3.30551	457.847	2.94309	135941	73.7848	5.03435	14.2595	2.08772		710.228	17.8205	0.0491767	1147.88	1993.64	0.032762	399.394	117.224	0.000229879	83.6364	0.21442	64.2424	24.6083	927.273	39.8565	0.598739	206.667	710.228	1993.64	117.224	0.21442
121-75-5	Malathion	Insecticide, Acaricide, Veterinary treatment	Organophosphate	0.00758	91.4442	229.087	2.36	0.00049389	1.99244e-07	0.999948								4.3964	6.83361	2.81423	11.3033	2.52919	58122.6	58.3425	4.16468	11.4496	2.04362		861.614	578.343	0.0731678	1147.88	2341.67	1.32705	399.394	136.407	0.000537657	83.6364	0.271173	64.2424	29.747	927.273	49.6377	0.611658	206.667	861.614	2341.67	136.407	0.271173
121-86-8	2-CHLORO-4-NITROTOLUENE	Metabolite	Other pesticide class	0.581	1.19302	1000	3	2.20669	0.000890216	0.999949								5.0965	9.18934	3.18126	46.535	2.83841	53.1698	69.8792	4.8144	13.5488	2.07814		743.256	7.54534	0.0544109	1147.88	2071.51	0.322338	399.394	121.547	0.58774	83.6364	0.226403	64.2424	25.7325	927.273	41.9471	0.6015	206.667	743.256	2071.51	121.547	0.226403
122-14-5	FENITROTHION	Insecticide	Organophosphate	0.785	0.88299	1995.26	3.3	0.09393	3.7893e-05	0.99994								5.22465	9.70465	3.24845	92.0198	2.89501	2467.18	71.991	4.93333	13.9331	2.08343		725.025	5.58451	0.0515217	1147.88	2028.66	0.163008	399.394	119.17	0.0126663	83.6364	0.219762	64.2424	25.1122	927.273	40.7902	0.599972	206.667	725.025	2028.66	119.17	0.219762
122-20-3	2-Propanol, 1,1',1''-nitrilotris-	Other product constituent	Other pesticide class	0.00073	949.517	0.060256	-1.22	5.71506e-07	2.30556e-10	0.953897								0.875043	0.803014	0.968114	0.836438	0.973855	4.16036e+06	0.314942	0.896684	0.890975	0.900163		4328.93	6005.26	0.622654	1147.88	6807.05	17.9332	399.394	354.262	7.51137e-06	83.6364	50.2342	64.2424	138.161	927.273	637.878	1.38864	206.667	4328.93	6807.05	354.262	50.2342
122-34-9	simazine	Herbicide	Other pesticide class	0.0875	7.92168	151.356	2.18	9.5142e-05	3.8382e-08	0.999942								4.04596	5.88273	2.63051	7.75086	2.3744	207799	52.5677	3.83945	10.3988	2.02173		936.242	50.101	0.0849946	1147.88	2505.22	1.93527	399.394	145.3	0.000150386	83.6364	0.300962	64.2424	32.2667	927.273	54.6535	0.618284	206.667	936.242	2505.22	145.3	0.300962
122-39-4	diphenylamine	Fungicide, Insecticide, Plant growth regulator	Other pesticide class	0.262	2.6456	3162.28	3.5	0.27169	0.000109605	0.999927								5.27416	9.91218	3.27441	145.354	2.91688	1346.76	72.807	4.97929	14.0816	2.0854		718.218	16.7322	0.050443	1147.88	2012.58	0.103196	399.394	118.277	0.0232039	83.6364	0.217299	64.2424	24.8804	927.273	40.3601	0.599404	206.667	718.218	2012.58	118.277	0.217299
122-42-9	ISOPROPYL PHENYL CARBAMATE	Herbicide, Plant growth regulator	Carbamate	0.0422	16.4253	398.107	2.6	0.018584	7.49712e-06	0.999951								4.75038	7.93739	2.99981	19.0277	2.68554	2590.21	64.1757	4.49319	12.511	2.06238		797.41	103.882	0.062993	1147.88	2196.81	0.788324	399.394	128.466	0.0120647	83.6364	0.246525	64.2424	27.5721	927.273	45.4266	0.606096	206.667	797.41	2196.81	128.466	0.246525
122836-35-5	Sulfentrazone	Herbicide	Other pesticide class	0.017	40.7734	446.684	2.65	6.4337e-08	2.59547e-11	0.999952								4.80866	8.13517	3.03036	21.2477	2.71128	8.34989e+08	65.136	4.54727	12.6858	2.0652		787.746	257.873	0.0614615	1147.88	2174.66	0.705958	399.394	127.246	3.74256e-08	83.6364	0.24289	64.2424	27.2442	927.273	44.8009	0.60527	206.667	787.746	2174.66	127.246	0.24289
122-88-3	P-CHLOROPHENOXYACETIC ACID	Plant growth regulator, Herbicide	Other pesticide class	1.06	0.653912	177.828	2.25	0.0012687	5.11815e-07	0.999945								4.19074	6.26027	2.70641	8.96066	2.43835	17981.8	54.9535	3.97381	10.833	2.03123		903.898	4.1357	0.0798688	1147.88	2434.96	1.67398	399.394	141.489	0.00173786	83.6364	0.287896	64.2424	31.1758	927.273	52.4634	0.615391	206.667	903.898	2434.96	141.489	0.287896
122931-48-0	RIMSULFURON	Herbicide	Other pesticide class	0.000944	734.266	1.94984	0.29	6.4842e-05	2.61584e-08	0.998473								1.00616	0.937635	1.03685	0.922795	1.03177	40018.7	2.47553	1.01836	1.28411	1.10552		3764.82	4643.9	0.533256	1147.88	6355.78	16.255	399.394	334.378	0.000780885	83.6364	6.39091	64.2424	121.653	927.273	442.588	1.13069	206.667	3764.82	6355.78	334.378	6.39091
123312-89-0	Pymetrozine	Insecticide	Other pesticide class	0.000434	1597.11	0.660693	-0.18	1.37829e-06	5.56026e-10	0.995578								0.917553	0.84621	0.9904	0.863879	0.992632	1.77517e+06	1.01546	0.936135	1.01844	0.974137		4128.37	10101	0.59087	1147.88	6653.88	17.3635	399.394	347.561	1.76039e-05	83.6364	15.58	64.2424	132.338	927.273	558.043	1.28319	206.667	4128.37	6653.88	347.561	15.58
123-31-9	Hydroquinone	Other product constituent	Other pesticide class	0.0113	61.3405	3.89045	0.59	4.7773e-06	1.92725e-09	0.999216								1.13307	1.07197	1.10339	1.01148	1.08782	589869	4.56684	1.13614	1.66465	1.2537		3343.14	387.95	0.46643	1147.88	5972.53	14.8297	399.394	317.148	5.29778e-05	83.6364	3.4643	64.2424	109.042	927.273	341.414	0.997052	206.667	3343.14	5972.53	317.148	3.4643
123-33-1	MALEIC HYDRAZIDE	Plant growth regulator, Herbicide	Other pesticide class	0.013	53.319	0.144544	-0.84	1.21949e-07	4.91963e-11	0.98023								0.881059	0.809102	0.971268	0.84029	0.976513	1.95768e+07	0.414087	0.902267	0.909015	0.911134		4299.37	337.218	0.617969	1147.88	6784.95	17.851	399.394	353.298	1.59628e-06	83.6364	38.2067	64.2424	137.306	927.273	625.219	1.37192	206.667	4299.37	6784.95	353.298	38.2067
123343-16-8	Pyrithiobac-sodium salt	Herbicide	Other pesticide class	0.598	1.15911	3.98107	0.6	2.2927e-12	9.24916e-16	0.999233								1.13881	1.07815	1.1064	1.01562	1.09036	1.23365e+12	4.66152	1.14147	1.68187	1.25953		3326.28	7.33084	0.463757	1147.88	5956.27	14.7692	399.394	316.41	2.53312e-11	83.6364	3.39393	64.2424	108.532	927.273	337.917	0.992433	206.667	3326.28	5956.27	316.41	3.39393
123-91-1	1,4-Dioxane	Other product constituent	Other pesticide class	0.0311	22.2877	0.537032	-0.27	0.4848	0.000195577	0.994574								0.908864	0.837346	0.985845	0.858227	0.988794	5.01749	0.872274	0.928072	0.992387	0.959664		4167.84	140.959	0.597125	1147.88	6684.62	17.4779	399.394	348.91	6.22821	83.6364	18.1375	64.2424	133.488	927.273	572.693	1.30254	206.667	4167.84	6684.62	348.91	18.1375
12427-38-2	MANEB	Fungicide	Dithiocarbamate	0.0237	29.2467	4.16869	0.62	1.86281e-08	7.5149e-12	0.999266								1.15066	1.09092	1.11261	1.0242	1.09559	1.52993e+08	4.85674	1.15247	1.7174	1.27136		3292.03	184.972	0.45833	1147.88	5923.02	14.6456	399.394	314.899	2.04257e-07	83.6364	3.25751	64.2424	107.497	927.273	330.927	0.983201	206.667	3292.03	5923.02	314.899	3.25751
124-40-3	Dimethylamine	Metabolite	Other pesticide class	0.134	5.17274	0.416869	-0.38	1.7877	0.00072119	0.993031								0.900388	0.828717	0.981401	0.852736	0.98505	1.35295	0.732602	0.920206	0.966972	0.945237		4207.07	32.7152	0.603343	1147.88	6714.89	17.5904	399.394	350.236	23.0977	83.6364	21.5955	64.2424	134.629	927.273	587.745	1.32242	206.667	4207.07	6714.89	350.236	21.5955
124-58-3	METHANE ARSONATE	Herbicide	Other pesticide class	0.00966	71.7544	0.0660693	-1.18	8.96683e-06	3.61738e-09	0.95778								0.875458	0.803434	0.968332	0.836704	0.974039	265237	0.321789	0.897069	0.892221	0.900926		4326.88	453.814	0.622328	1147.88	6805.52	17.9275	399.394	354.195	0.000117819	83.6364	49.1654	64.2424	138.102	927.273	636.987	1.38746	206.667	4326.88	6805.52	354.195	49.1654
125401-92-5	Bispyribac-sodium	Herbicide	Other pesticide class	0.143	4.84718	0.0933254	-1.03	4.98767e-17	2.01211e-20	0.969727								0.877405	0.805404	0.969352	0.837949	0.974899	4.77472e+16	0.353872	0.898876	0.898059	0.904491		4317.28	30.6562	0.620807	1147.88	6798.35	17.9008	399.394	353.883	6.54489e-16	83.6364	44.7079	64.2424	137.824	927.273	632.846	1.38199	206.667	4317.28	6798.35	353.883	44.7079
126-22-7	BUTONATE	Insecticide	Organophosphate	0.0582	11.9097	51.2861	1.71	0.0167275	6.74816e-06	0.999906								2.89113	3.46596	2.02507	3.17753	1.86433	494.187	33.5375	2.76771	6.93612	1.91037		1310.22	75.3237	0.14426	1147.88	3254.21	4.72065	399.394	185.053	0.0632351	83.6364	0.471738	64.2424	44.7614	927.273	81.9382	0.654323	206.667	1310.22	3254.21	185.053	0.471738
126535-15-7	Triflusulfuron-methyl	Herbicide	Other pesticide class	0.00189	366.745	8709.64	3.94	4.01749e-08	1.62073e-11	0.999866								5.32938	10.1495	3.30336	398.876	2.94127	2.49811e+10	73.7169	5.03053	14.2471	2.08756		710.776	2319.49	0.0492637	1147.88	1994.94	0.0376057	399.394	117.296	1.25094e-09	83.6364	0.214617	64.2424	24.6269	927.273	39.8911	0.598785	206.667	710.776	1994.94	117.296	0.214617
127-20-8	DALAPON (SODIUM SALT)	Herbicide	Other pesticide class	0.0887	7.81451	0.0074131	-2.13	1.36603e-09	5.51081e-13	0.718089								0.871263	0.799194	0.966132	0.834023	0.972186	1.73612e+09	0.25265	0.893176	0.87964	0.89318		4347.71	49.4232	0.62563	1147.88	6821.01	17.9851	399.394	354.87	1.79999e-08	83.6364	62.6199	64.2424	138.704	927.273	646.097	1.39949	206.667	4347.71	6821.01	354.87	62.6199
12771-68-5	ANCYMIDOL	Plant growth regulator	Other pesticide class	0.817	0.848405	81.2831	1.91	1.5756e-06	6.35625e-10	0.999926								3.40576	4.4293	2.29487	4.54843	2.09164	7.4352e+06	42.0181	3.24532	8.47924	1.96966		1112.23	5.36578	0.112885	1147.88	2871.62	3.29784	399.394	164.942	4.20298e-06	83.6364	0.376526	64.2424	38.174	927.273	67.0265	0.634626	206.667	1112.23	2871.62	164.942	0.376526
128639-02-1	Carfentrazone-ethyl	Herbicide	Other pesticide class	0.0117	59.2433	2290.87	3.36	0.00029896	1.20606e-07	0.999936								5.24183	9.77613	3.25746	105.529	2.9026	888831	72.2742	4.94928	13.9846	2.08412		722.648	374.687	0.051145	1147.88	2023.05	0.142141	399.394	118.859	3.51585e-05	83.6364	0.218901	64.2424	25.0312	927.273	40.6399	0.599774	206.667	722.648	2023.05	118.859	0.218901
13071-79-9	TERBUFOS	Insecticide, Nematicide	Organophosphate	1.98	0.350074	30199.5	4.48	2.424	0.000977885	0.999628								5.35218	10.2493	3.31531	1380.99	2.95134	1433.19	74.0926	5.05169	14.3155	2.08844		707.749	2.21406	0.0487839	1147.88	1987.75	0.0108618	399.394	116.896	0.0218045	83.6364	0.213529	64.2424	24.5238	927.273	39.7006	0.598533	206.667	707.749	1987.75	116.896	0.213529
13121-70-5	TRICYCLOHEXYLHYDROXYSTANNANE	Insecticide, Acaricide, Metabolite	Other pesticide class	9.87	0.0702277	4.2658e+06	6.63	0.012844	5.1815e-06	0.954757								5.36142	10.2901	3.32015	194953	2.95542	3.81805e+07	74.2449	5.06026	14.3432	2.08879		706.529	0.444158	0.0485906	1147.88	1984.85	7.69415e-05	399.394	116.735	8.18481e-07	83.6364	0.213091	64.2424	24.4823	927.273	39.6239	0.598432	206.667	706.529	1984.85	116.735	0.213091
131341-86-1	FLUDIOXONIL	Fungicide	Other pesticide class	5.8	0.119508	13182.6	4.12	5.3732e-05	2.16765e-08	0.999817								5.34022	10.1968	3.30904	603.295	2.94606	2.82479e+07	73.8956	5.04059	14.2796	2.08798		709.334	0.755834	0.049035	1147.88	1991.51	0.0248635	399.394	117.105	1.10628e-06	83.6364	0.214098	64.2424	24.5778	927.273	39.8003	0.598665	206.667	709.334	1991.51	117.105	0.214098
13171-21-6	PHOSPHAMIDON	Insecticide, Acaricide	Organophosphate	0.0236	29.3706	6.16595	0.79	6.5751e-07	2.65251e-10	0.999491								1.27277	1.22466	1.17663	1.11548	1.14952	4.68368e+06	6.86893	1.26579	2.08353	1.3791		2976.19	185.756	0.408278	1147.88	5600.76	13.4472	399.394	300.124	6.6721e-06	83.6364	2.30325	64.2424	97.8729	927.273	272.774	0.906389	206.667	2976.19	5600.76	300.124	2.30325
13181-17-4	BROMOFENOXIM	Herbicide	Other pesticide class	0.0384	18.0507	1995.26	3.3	1.05113e-05	4.24043e-09	0.99994								5.22465	9.70465	3.24845	92.0198	2.89501	2.20471e+07	71.991	4.93333	13.9331	2.08343		725.025	114.162	0.0515217	1147.88	2028.66	0.163008	399.394	119.17	1.41742e-06	83.6364	0.219762	64.2424	25.1122	927.273	40.7902	0.599972	206.667	725.025	2028.66	119.17	0.219762
131860-33-8	Azoxystrobin	Fungicide	Strobilurin	0.67	1.03455	316.228	2.5	7.373e-09	2.9744e-12	0.99995								4.61833	7.50682	2.93058	15.2857	2.62721	5.2521e+09	61.9997	4.37064	12.1151	2.05573		820.209	6.54304	0.0666061	1147.88	2248.7	0.981308	399.394	131.318	5.95e-09	83.6364	0.255177	64.2424	28.3452	927.273	46.9112	0.608057	206.667	820.209	2248.7	131.318	0.255177
13194-48-4	O-ETHYL S,S-DIPROPYL PHOSPHORODITHIOATE	Insecticide, Nematicide	Organophosphate	0.158	4.38701	3890.45	3.59	0.016362	6.60072e-06	0.999919								5.29025	9.98065	3.28284	178.632	2.92399	27478.9	73.0721	4.99421	14.1298	2.08604		716.034	27.7458	0.0500969	1147.88	2007.41	0.0839713	399.394	117.99	0.00113724	83.6364	0.216511	64.2424	24.806	927.273	40.2223	0.599222	206.667	716.034	2007.41	117.99	0.216511
1330-20-7	Xylenes	Other product constituent	Other pesticide class	0.958	0.723536	1318.26	3.12	523.18	0.21106	0.999946								5.15756	9.43108	3.21328	61.0798	2.86538	0.294192	70.8856	4.87108	13.7319	2.08069		734.455	4.57603	0.0530162	1147.88	2050.87	0.24558	399.394	120.403	106.223	83.6364	0.223189	64.2424	25.4331	927.273	41.3877	0.600761	206.667	734.455	2050.87	120.403	0.223189
133-06-2	Captan	Fungicide, Bactericide	Other pesticide class	2.51	0.276154	630.957	2.8	0.000707	2.85216e-07	0.999951								4.95552	8.65624	3.10735	29.6693	2.77614	105947	67.5561	4.68357	13.1261	2.07199		764.401	1.74655	0.0577618	1147.88	2120.78	0.505574	399.394	124.273	0.000294959	83.6364	0.234189	64.2424	26.4514	927.273	43.2979	0.603284	206.667	764.401	2120.78	124.273	0.234189
133-07-3	FOLPET	Fungicide	Other pesticide class	3.14	0.220748	707.946	2.85	0.0077366	3.12108e-06	0.999951								4.99607	8.80616	3.12861	33.1877	2.79405	10825.8	68.2244	4.7212	13.2477	2.0738		758.196	1.39613	0.0567785	1147.88	2106.36	0.451974	399.394	123.476	0.00288662	83.6364	0.231895	64.2424	26.2405	927.273	42.9005	0.60276	206.667	758.196	2106.36	123.476	0.231895
133-32-4	3-INDOLEBUTYRIC ACID	Plant growth regulator	Botanical insecticide	0.471	1.47165	199.526	2.3	0.00019511	7.8711e-08	0.999946								4.28761	6.52466	2.75719	9.9523	2.48114	129711	56.5498	4.06372	11.1234	2.03722		883.476	9.30752	0.0766323	1147.88	2390.11	1.50719	399.394	139.049	0.000240921	83.6364	0.279769	64.2424	30.486	927.273	51.0934	0.613581	206.667	883.476	2390.11	139.049	0.279769
13356-08-6	FENBUTATIN OXIDE	Acaricide	Other pesticide class	8750	7.92168e-05	4.46684e+14	14.65	0.000199319	8.04089e-08	2.01687e-07								5.36148	10.2903	3.32019	2.0414e+13	2.95545	2.57627e+17	74.2459	5.06032	14.3434	2.0888		706.521	0.00050101	0.0485892	1147.88	1984.83	7.34789e-13	399.394	116.733	1.21299e-16	83.6364	0.213088	64.2424	24.482	927.273	39.6234	0.598431	206.667	706.521	1984.83	116.733	0.213088
13360-45-7	CHLORBROMURON	Herbicide	Other pesticide class	0.11	6.30134	1230.27	3.09	0.00044238	1.78464e-07	0.999947								5.14369	9.37555	3.206	57.0586	2.85925	325061	70.6569	4.8582	13.6903	2.08012		736.437	39.8531	0.0533302	1147.88	2055.52	0.262888	399.394	120.661	9.61359e-05	83.6364	0.223912	64.2424	25.5005	927.273	41.5135	0.600927	206.667	736.437	2055.52	120.661	0.223912
133-90-4	3-AMINO-2,5-DICHLOROBENZOIC ACID	Herbicide	Other pesticide class	0.123	5.63534	79.4328	1.9	3.9087e-06	1.57684e-09	0.999926								3.38031	4.37782	2.28153	4.46387	2.08039	2.94272e+06	41.5986	3.22169	8.4029	1.96717		1120.61	35.641	0.114212	1147.88	2888.41	3.36031	399.394	165.834	1.06194e-05	83.6364	0.380323	64.2424	38.4539	927.273	67.6354	0.635431	206.667	1120.61	2888.41	165.834	0.380323
134-20-3	METHYL ANTHRANILATE	Repellent	Botanical insecticide	0.0307	22.5781	75.8578	1.88	0.19089	7.70084e-05	0.999924								3.32919	4.27574	2.25473	4.30048	2.05782	58.1027	40.7562	3.17425	8.24964	1.96204		1137.81	142.796	0.116939	1147.88	2922.74	3.48798	399.394	167.653	0.537841	83.6364	0.388183	64.2424	39.0286	927.273	68.8919	0.63709	206.667	1137.81	2922.74	167.653	0.388183
13457-18-6	PYRAZOPHOS	Fungicide	Other pesticide class	0.0921	7.52603	6309.57	3.8	0.00269063	1.08545e-06	0.999893								5.31729	10.097	3.29702	289.19	2.93593	270460	73.5177	5.01931	14.2109	2.08709		712.393	47.5987	0.0495198	1147.88	1998.78	0.0518691	399.394	117.509	0.000115544	83.6364	0.215198	64.2424	24.682	927.273	39.9928	0.598919	206.667	712.393	1998.78	117.509	0.215198
134-62-3	DEET [N,N,-DIET-3-ME BENZAMIDE]	Insecticide, Repellent	Other pesticide class	0.206	3.36479	151.356	2.18	0.0765886	3.08972e-05	0.999942								4.04596	5.88273	2.63051	7.75086	2.3744	258.137	52.5677	3.83945	10.3988	2.02173		936.242	21.2808	0.0849946	1147.88	2505.22	1.93527	399.394	145.3	0.12106	83.6364	0.300962	64.2424	32.2667	927.273	54.6535	0.618284	206.667	936.242	2505.22	145.3	0.300962
135158-54-2	CGA 245704	Fungicide, Insecticide	Other pesticide class	0.22	3.15067	1258.93	3.1	0.012019	4.84868e-06	0.999947								5.14841	9.39441	3.20848	58.3682	2.86134	12238.5	70.7347	4.86258	13.7045	2.08031		735.761	19.9265	0.0532231	1147.88	2053.93	0.256989	399.394	120.573	0.00255342	83.6364	0.223665	64.2424	25.4775	927.273	41.4706	0.600871	206.667	735.761	2053.93	120.573	0.223665
13593-03-8	QUINALPHOS	Insecticide, Acaricide	Organophosphate	0.944	0.734266	27542.3	4.44	0.0046864	1.89058e-06	0.999657								5.35128	10.2453	3.31484	1259.55	2.95095	676123	74.0778	5.05086	14.3128	2.08841		707.868	4.6439	0.0488027	1147.88	1988.03	0.011909	399.394	116.912	4.62194e-05	83.6364	0.213571	64.2424	24.5278	927.273	39.708	0.598543	206.667	707.868	1988.03	116.912	0.213571
13684-56-5	DESMEDIPHAM	Herbicide	Carbamate	0.0245	28.2917	2454.71	3.39	1.7069e-05	6.88594e-09	0.999935								5.24962	9.80871	3.26154	113.017	2.90604	1.66711e+07	72.4026	4.95651	14.008	2.08443		721.576	178.932	0.0509751	1147.88	2020.52	0.132723	399.394	118.718	1.8745e-06	83.6364	0.218513	64.2424	24.9947	927.273	40.5721	0.599684	206.667	721.576	2020.52	118.718	0.218513
13684-63-4	PHENMEDIPHAM	Herbicide	Carbamate	0.0715	9.69437	3890.45	3.59	8.4941e-08	3.42667e-11	0.999919								5.29025	9.98065	3.28284	178.632	2.92399	5.29321e+09	73.0721	4.99421	14.1298	2.08604		716.034	61.3124	0.0500969	1147.88	2007.41	0.0839713	399.394	117.99	5.90379e-09	83.6364	0.216511	64.2424	24.806	927.273	40.2223	0.599222	206.667	716.034	2007.41	117.99	0.216511
137-26-8	Thiram	Fungicide, Repellent, Metabolite	Dithiocarbamate	0.228	3.04012	53.7032	1.73	0.018382	7.41563e-06	0.999908								2.94242	3.55515	2.05196	3.28799	1.88699	464.822	34.3827	2.81531	7.08992	1.91725		1287.38	19.2274	0.140641	1147.88	3211.56	4.56206	399.394	182.831	0.06723	83.6364	0.460141	64.2424	44.0046	927.273	80.1608	0.651975	206.667	1287.38	3211.56	182.831	0.460141
137-30-4	ZIRAM	Fungicide, Repellent	Dithiocarbamate	0.109	6.35915	16.9824	1.23	6.2519e-05	2.52213e-08	0.999792								1.82773	1.88632	1.46757	1.6098	1.39464	69147.2	16.0141	1.78083	3.74758	1.67469		2072.51	40.2187	0.265066	1147.88	4490.41	9.3179	399.394	247.375	0.000451934	83.6364	0.987936	64.2424	69.5669	927.273	151.654	0.746407	206.667	2072.51	4490.41	247.375	0.987936
137-41-7	Methylcarbamodithioic acid, Monopotassium salt	Fungicide, Insecticide, Nematicide, Soil sterilent	Dithiocarbamate	0.0381	18.1928	3.01995	0.48	0.0316086	1.27515e-05	0.999								1.07706	1.01219	1.07403	0.9717	1.06309	85.9866	3.64401	1.08417	1.49673	1.19315		3516.97	115.061	0.493977	1147.88	6135.79	15.4369	399.394	324.527	0.363429	83.6364	4.34162	64.2424	114.269	927.273	379.717	1.04764	206.667	3516.97	6135.79	324.527	4.34162
137-42-8	METHYLDITHIOCARBAMIC ACID, NA SALT	Herbicide, Fungicide, Nematicide, Insecticide	Dithiocarbamate	0.0334	20.7529	0.00239883	-2.62	1.08059e-10	4.3593e-14	0.451849								0.870903	0.798831	0.965944	0.833794	0.972027	2.19419e+10	0.246733	0.892842	0.878564	0.892513		4349.51	131.253	0.625914	1147.88	6822.34	17.9901	399.394	354.928	1.42422e-09	83.6364	64.1215	64.2424	138.755	927.273	646.889	1.40054	206.667	4349.51	6822.34	354.928	64.1215
138261-41-3	IMIDACLOPRID	Insecticide, Veterinary treatment	Neonicotinoid	0.013	53.319	3.71535	0.57	1.6665e-10	6.72296e-14	0.99918								1.12192	1.06001	1.09754	1.00348	1.0829	1.67888e+10	4.38316	1.1258	1.63122	1.24218		3376.36	337.218	0.471694	1147.88	6004.33	14.948	399.394	318.59	1.86136e-09	83.6364	3.60948	64.2424	110.043	927.273	348.409	1.00629	206.667	3376.36	6004.33	318.59	3.60948
138-86-3	LIMONENE	Insecticide, Repellent, Adjuvant, Veterinary treatment	Botanical insecticide	3.53	0.196359	37153.5	4.57	3221.9	1.29977	0.999551								5.35392	10.2569	3.31622	1698.8	2.95211	1.32638	74.1212	5.0533	14.3207	2.08851		707.519	1.24188	0.0487475	1147.88	1987.2	0.00882977	399.394	116.866	23.5603	83.6364	0.213446	64.2424	24.516	927.273	39.6861	0.598514	206.667	707.519	1987.2	116.866	0.213446
139-40-2	PROPAZINE	Herbicide	Other pesticide class	0.145	4.78033	851.138	2.93	0.0004646	1.87428e-07	0.99995								5.05333	9.0225	3.15863	39.7318	2.81934	215704	69.1679	4.77434	13.4194	2.07629		749.605	30.2334	0.055417	1147.88	2086.35	0.377531	399.394	122.369	0.000144874	83.6364	0.228732	64.2424	25.9484	927.273	42.3516	0.602035	206.667	749.605	2086.35	122.369	0.228732
140-38-5	P-CHLOROPHENYLUREA	Metabolite	Other pesticide class	0.0218	31.7957	63.0957	1.8	0.00211686	8.53981e-07	0.999916								3.12303	3.88071	2.14665	3.71724	1.96676	4546.4	37.3589	2.98292	7.63146	1.9396		1212.93	201.094	0.128842	1147.88	3069.9	4.03525	399.394	175.416	0.00687357	83.6364	0.423484	64.2424	41.5319	927.273	74.4724	0.644461	206.667	1212.93	3069.9	175.416	0.423484
140-56-7	FENAMINOSULF	Fungicide, Bactericide	Other pesticide class	0.00931	74.4519	0.0218776	-1.66	9.54712e-13	3.85148e-16	0.882574								0.872298	0.80024	0.966675	0.834684	0.972643	2.48584e+12	0.269711	0.894136	0.882745	0.895099		4342.55	470.874	0.624813	1147.88	6817.18	17.9709	399.394	354.704	1.25712e-11	83.6364	58.6586	64.2424	138.555	927.273	643.825	1.39649	206.667	4342.55	6817.18	354.704	58.6586
140-57-8	ARAMITE	Insecticide, Miticide, Acaricide	Other pesticide class	3.77	0.183859	66069.3	4.82	0.293518	0.00011841	0.99923								5.35723	10.2715	3.31795	3020.29	2.95357	25884.6	74.1758	5.05637	14.3306	2.08863		707.082	1.16282	0.0486782	1147.88	1986.16	0.00496641	399.394	116.808	0.00120728	83.6364	0.213289	64.2424	24.5011	927.273	39.6587	0.598478	206.667	707.082	1986.16	116.808	0.213289
140-67-0	Benzene, 1-methoxy-4-(2-propenyl)-	Insecticide, Semiochemical, Pheromone, Repellent	Botanical insecticide	1.26	0.550117	2951.21	3.47	18.3181	0.00738985	0.999929								5.26805	9.88629	3.2712	135.708	2.91418	18.6502	72.7062	4.97361	14.0632	2.08516		719.052	3.47924	0.0505751	1147.88	2014.55	0.110532	399.394	118.387	1.67558	83.6364	0.2176	64.2424	24.9088	927.273	40.4127	0.599474	206.667	719.052	2014.55	118.387	0.2176
141112-29-0	Isoxaflutole	Herbicide	Other pesticide class	0.319	2.17288	208.93	2.32	1.8685e-05	7.53786e-09	0.999947								4.32479	6.62876	2.77668	10.382	2.49756	1.41231e+06	57.1624	4.09822	11.2349	2.03945		875.882	13.7424	0.0754288	1147.88	2373.34	1.4448	399.394	138.135	2.21269e-05	83.6364	0.276771	64.2424	30.2294	927.273	50.5865	0.612912	206.667	875.882	2373.34	138.135	0.276771
141-66-2	DICROTOPHOS	Insecticide, Acaricide	Organophosphate	0.00957	72.4292	1	0	5.0803e-06	2.04948e-09	0.997062								0.941221	0.870446	1.00281	0.879386	1.00309	489282	1.40548	0.958101	1.08941	1.01201		4024.56	458.081	0.574418	1147.88	6571.54	17.0574	399.394	343.939	6.38691e-05	83.6364	11.2566	64.2424	129.304	927.273	521.69	1.23517	206.667	4024.56	6571.54	343.939	11.2566
141776-32-1	SULFOSULFURON	Herbicide	Other pesticide class	0.00478	145.01	9.77237	0.99	2.3028e-06	9.28991e-10	0.999665								1.47621	1.45655	1.28328	1.28029	1.23938	1.51735e+06	10.2214	1.4546	2.69355	1.51553		2566.03	917.121	0.343277	1147.88	5135.27	11.7161	399.394	278.365	2.05951e-05	83.6364	1.54782	64.2424	85.1691	927.273	210.998	0.824792	206.667	2566.03	5135.27	278.365	1.54782
1420-06-0	TRIFENMORPH	Insecticide, Molluscicide	Morpholine	0.125	5.54518	16218.1	4.21	0.0610581	2.46319e-05	0.999783								5.34419	10.2142	3.31112	742.022	2.94781	30573.8	73.9609	5.04427	14.2915	2.08813		708.807	35.0707	0.0489516	1147.88	1990.26	0.020215	399.394	117.036	0.00102212	83.6364	0.213909	64.2424	24.5599	927.273	39.7672	0.598621	206.667	708.807	1990.26	117.036	0.213909
1420-07-1	Dinoterb	Herbicide	Other pesticide class	0.0977	7.09465	4365.16	3.64	0.00868351	3.50308e-06	0.999914								5.29789	10.0133	3.28684	200.327	2.92736	58062	73.1979	5.0013	14.1527	2.08634		715.002	44.8704	0.0499333	1147.88	2004.96	0.0748775	399.394	117.854	0.000538218	83.6364	0.216139	64.2424	24.7709	927.273	40.1573	0.599136	206.667	715.002	2004.96	117.854	0.216139
14214-32-5	DIFENOXURON	Herbicide	Other pesticide class	0.134	5.17274	346.737	2.54	5.51662e-05	2.22551e-08	0.999951								4.67371	7.6845	2.95961	16.68	2.65167	765522	62.9122	4.42203	12.2811	2.05856		810.491	32.7152	0.0650661	1147.88	2226.64	0.89928	399.394	130.107	4.08218e-05	83.6364	0.251476	64.2424	28.0158	927.273	46.277	0.607219	206.667	810.491	2226.64	130.107	0.251476
142459-58-3	Fluthiamide	Herbicide	Other pesticide class	0.533	1.30046	1584.89	3.2	0.00058176	2.34692e-07	0.999944								5.19057	9.56459	3.23058	73.2654	2.87996	317257	71.4294	4.9017	13.8309	2.08205		729.786	8.22484	0.0522762	1147.88	2039.88	0.204735	399.394	119.793	9.85007e-05	83.6364	0.22149	64.2424	25.2742	927.273	41.0916	0.60037	206.667	729.786	2039.88	119.793	0.22149
142-59-6	NABAM	Fungicide, Algicide, Bactericide	Dithiocarbamate	0.0183	37.8769	5.7544e-05	-4.24	1.62001e-13	6.53539e-17	0.0193911								0.870736	0.798662	0.965856	0.833687	0.971953	1.46342e+13	0.24397	0.892687	0.878061	0.892201		4350.34	239.554	0.626047	1147.88	6822.96	17.9924	399.394	354.955	2.13541e-12	83.6364	64.8476	64.2424	138.78	927.273	647.259	1.40103	206.667	4350.34	6822.96	354.955	64.8476
143390-89-0	BAS 490F	Fungicide, Bacteriacide	Strobilurin	0.248	2.79495	2511.89	3.4	0.00035855	1.44645e-07	0.999934								5.25211	9.81913	3.26284	115.63	2.90714	811973	72.4435	4.95882	14.0154	2.08453		721.235	17.6768	0.050921	1147.88	2019.71	0.129724	399.394	118.673	3.84865e-05	83.6364	0.218389	64.2424	24.9831	927.273	40.5506	0.599656	206.667	721.235	2019.71	118.673	0.218389
143-50-0	Kepone	Insecticide, Fungicide, Metabolite	Organochlorine	13.2	0.0525112	257040	5.41	0.0054338	2.19209e-06	0.997118								5.36039	10.2855	3.31961	11747.9	2.95497	5.4384e+06	74.2279	5.05931	14.3401	2.08875		706.665	0.332109	0.0486121	1147.88	1985.17	0.00127683	399.394	116.753	5.74617e-06	83.6364	0.21314	64.2424	24.4869	927.273	39.6324	0.598443	206.667	706.665	1985.17	116.753	0.21314
144-21-8	DSMA	Herbicide	Other pesticide class	0.00745	93.0399	4.57088e-06	-5.34	5.67685e-09	2.29014e-12	0.00156829								0.870732	0.798658	0.965854	0.833684	0.971951	4.17616e+08	0.243908	0.892683	0.87805	0.892194		4350.36	588.435	0.62605	1147.88	6822.98	17.9924	399.394	354.956	7.48295e-08	83.6364	64.8642	64.2424	138.78	927.273	647.268	1.40104	206.667	4350.36	6822.98	354.956	64.8642
14437-17-3	CHLORFENPROP METHYL	Herbicide	Other pesticide class	0.263	2.63554	2511.89	3.4	1.57731	0.000636315	0.999934								5.25211	9.81913	3.26284	115.63	2.90714	184.576	72.4435	4.95882	14.0154	2.08453		721.235	16.6686	0.050921	1147.88	2019.71	0.129724	399.394	118.673	0.169307	83.6364	0.218389	64.2424	24.9831	927.273	40.5506	0.599656	206.667	721.235	2019.71	118.673	0.218389
14484-64-1	FERBAM	Fungicide	Dithiocarbamate	0.0237	29.2467	0.0251189	-1.6	2.81491e-07	1.13559e-10	0.896149								0.87253	0.800474	0.966796	0.834832	0.972745	8.43235e+06	0.273533	0.894352	0.88344	0.895528		4341.4	184.972	0.62463	1147.88	6816.33	17.9677	399.394	354.666	3.70597e-06	83.6364	57.839	64.2424	138.521	927.273	643.318	1.39582	206.667	4341.4	6816.33	354.666	57.839
145-73-3	ENDOTHAL	Herbicide, Algicide, Plant growth regulator	Other pesticide class	1.59	0.435942	81.2831	1.91	3.8885e-11	1.56869e-14	0.999926								3.40576	4.4293	2.29487	4.54843	2.09164	3.0127e+11	42.0181	3.24532	8.47924	1.96966		1112.23	2.75713	0.112885	1147.88	2871.62	3.29784	399.394	164.942	1.03727e-10	83.6364	0.376526	64.2424	38.174	927.273	67.0265	0.634626	206.667	1112.23	2871.62	164.942	0.376526
14698-29-4	OXOLINIC ACID	Veterinary treatment; Fungicide	Other pesticide class	0.0268	25.8637	8.70964	0.94	1.11027e-05	4.47903e-09	0.999629								1.41839	1.38946	1.25297	1.23173	1.21385	303709	9.2687	1.40094	2.52019	1.48111		2670.63	163.576	0.359852	1147.88	5259.49	12.178	399.394	284.221	0.000102895	83.6364	1.70692	64.2424	88.431	927.273	225.512	0.843963	206.667	2670.63	5259.49	284.221	1.70692
14816-18-3	PHOXIM	Insecticide, Disinfectant	Organophosphate	1.1	0.630134	24547.1	4.39	0.15251	6.15253e-05	0.999691								5.35004	10.2399	3.31419	1122.67	2.9504	18518.5	74.0574	5.04971	14.3091	2.08836		708.032	3.98531	0.0488287	1147.88	1988.42	0.013361	399.394	116.933	0.0016875	83.6364	0.21363	64.2424	24.5334	927.273	39.7184	0.598556	206.667	708.032	1988.42	116.933	0.21363
14816-20-7	Chlorphoxim	Insecticide	Organophosphate	7.34	0.0944342	107152	5.03	0.0349703	1.41077e-05	0.998775								5.35886	10.2787	3.31881	4897.82	2.95429	352309	74.2027	5.05789	14.3355	2.0887		706.867	0.597253	0.0486441	1147.88	1985.65	0.00306259	399.394	116.779	8.87005e-05	83.6364	0.213212	64.2424	24.4938	927.273	39.6451	0.59846	206.667	706.867	1985.65	116.779	0.213212
148-24-3	8-QUINOLINOL	Fungicide, Bactericide	Other pesticide class	0.0426	16.2711	104.713	2.02	0.05757	2.32248e-05	0.999934								3.67946	5.01135	2.43836	5.6192	2.21253	250.275	46.5282	3.49932	9.2999	1.99421		1029.5	102.907	0.0997736	1147.88	2702.63	2.66942	399.394	155.93	0.124863	83.6364	0.340028	64.2424	35.4031	927.273	61.1118	0.626814	206.667	1029.5	2702.63	155.93	0.340028
148-79-8	THIABENDAZOLE	Fungicide	Imidazole	0.193	3.59144	295.121	2.47	2.1412e-06	8.63798e-10	0.99995								4.5745	7.36901	2.9076	14.3211	2.60785	1.69519e+07	61.2774	4.32996	11.9836	2.05343		828.069	22.7142	0.0678517	1147.88	2266.48	1.04741	399.394	132.293	1.84346e-06	83.6364	0.258185	64.2424	28.6115	927.273	47.4258	0.608737	206.667	828.069	2266.48	132.293	0.258185
149979-41-9	BAS 620H	Herbicide	Other pesticide class	0.595	1.16495	1778.28	3.25	4.76895e-07	1.92388e-10	0.999942								5.20852	9.63809	3.23999	82.1034	2.88789	4.33635e+08	71.7253	4.91837	13.8847	2.08278		727.27	7.3678	0.0518775	1147.88	2033.96	0.182696	399.394	119.464	7.20651e-08	83.6364	0.220576	64.2424	25.1886	927.273	40.9323	0.60016	206.667	727.27	2033.96	119.464	0.220576
150-50-5	MERPHOS	Plant growth regulator, Herbicide	Organophosphate	12.9	0.0537323	4.67735e+07	7.67	150.509	0.060718	0.658231								5.36148	10.2903	3.32018	2.13761e+06	2.95545	35725.5	74.2458	5.06032	14.3434	2.0888		706.521	0.339833	0.0485894	1147.88	1984.83	7.01717e-06	399.394	116.734	0.000874726	83.6364	0.213088	64.2424	24.482	927.273	39.6234	0.598431	206.667	706.521	1984.83	116.734	0.213088
150-68-5	MONURON	Herbicide	Other pesticide class	0.0632	10.9675	87.0964	1.94	5.7772e-05	2.33063e-08	0.999929								3.48166	4.58537	2.33466	4.8141	2.12516	214346	43.2687	3.31575	8.7068	1.97687		1087.99	69.3646	0.109043	1147.88	2822.68	3.11584	399.394	162.341	0.000145792	83.6364	0.365643	64.2424	37.3631	927.273	65.2747	0.632313	206.667	1087.99	2822.68	162.341	0.365643
152-16-9	OCTAMETHYLPYROPHOSPHORAMIDE	Insecticide, Acaricide	Organophosphate	0.24	2.88811	0.0977237	-1.01	3.81667e-05	1.53971e-08	0.971048								0.877719	0.805721	0.969517	0.83815	0.975037	62409.9	0.359047	0.899168	0.899	0.905065		4315.73	18.266	0.620562	1147.88	6797.2	17.8966	399.394	353.833	0.000500722	83.6364	44.0636	64.2424	137.779	927.273	632.184	1.38112	206.667	4315.73	6797.2	353.833	44.0636
15263-53-3	Cartap	Insecticide	Other pesticide class	3.75e-05	18483.9	0.112202	-0.95	1.50315e-09	6.06399e-13	0.974685								0.878753	0.806767	0.970059	0.838812	0.975494	1.58576e+09	0.376076	0.900127	0.902099	0.906948		4310.66	116902	0.619758	1147.88	6793.4	17.8824	399.394	353.667	1.97066e-08	83.6364	42.0684	64.2424	137.632	927.273	630.012	1.37825	206.667	4310.66	6793.4	353.667	42.0684
15299-99-7	N,N-DIETHYL-2-(1-NAPHTHALENYLOXY)PROPANAMIDE	Herbicide	Other pesticide class	0.739	0.937953	2290.87	3.36	8.4941e-05	3.42667e-08	0.999936								5.24183	9.77613	3.25746	105.529	2.9026	3.12835e+06	72.2742	4.94928	13.9846	2.08412		722.648	5.93212	0.051145	1147.88	2023.05	0.142141	399.394	118.859	9.9893e-06	83.6364	0.218901	64.2424	25.0312	927.273	40.6399	0.599774	206.667	722.648	2023.05	118.859	0.218901
15310-01-7	BENZAMIDE, 2-IODO-N-PHENYL	Fungicide	Other pesticide class	0.117	5.92433	7413.1	3.87	0.000284354	1.14714e-07	0.99988								5.32382	10.1253	3.30044	339.622	2.93881	3.00529e+06	73.6252	5.02537	14.2304	2.08735		711.52	37.4687	0.0493815	1147.88	1996.71	0.0441667	399.394	117.394	1.03983e-05	83.6364	0.214884	64.2424	24.6523	927.273	39.9379	0.598846	206.667	711.52	1996.71	117.394	0.214884
15457-05-3	FLUORODIFEN	Herbicide	Other pesticide class	1.9	0.364814	4466.84	3.65	0.0450742	1.81837e-05	0.999913								5.29931	10.0195	3.28759	204.974	2.92799	11444.9	73.2214	5.00263	14.157	2.08639		714.81	2.30728	0.0499028	1147.88	2004.51	0.07318	399.394	117.828	0.00273047	83.6364	0.216069	64.2424	24.7643	927.273	40.1451	0.59912	206.667	714.81	2004.51	117.828	0.216069
15545-48-9	CHLORTOLURON	Herbicide	Other pesticide class	0.0542	12.7887	257.04	2.41	1.4544e-05	5.86731e-09	0.999949								4.48077	7.08248	2.85846	12.5807	2.56645	2.19469e+06	59.7328	4.24298	11.7026	2.04837		845.39	80.8827	0.0705967	1147.88	2305.44	1.1923	399.394	134.427	1.42389e-05	83.6364	0.264861	64.2424	29.198	927.273	48.5647	0.610241	206.667	845.39	2305.44	134.427	0.264861
1563-38-8	CARBOFURAN PHENOL	Metabolite	Other pesticide class	0.11	6.30134	120.226	2.08	0.0421512	1.70046e-05	0.999938								3.8221	5.33705	2.51314	6.32819	2.27553	384.135	48.8788	3.6317	9.72761	2.00557		991.078	39.8531	0.0936847	1147.88	2622.21	2.37035	399.394	151.613	0.0813516	83.6364	0.323676	64.2424	34.1126	927.273	58.4248	0.623265	206.667	991.078	2622.21	151.613	0.323676
1563-66-2	Carbofuran	Insecticide, Nematicide, Acaricide, Metabolite	Carbamate	0.0813	8.5258	208.93	2.32	0.00031209	1.25903e-07	0.999947								4.32479	6.62876	2.77668	10.382	2.49756	84555.5	57.1624	4.09822	11.2349	2.03945		875.882	53.9218	0.0754288	1147.88	2373.34	1.4448	399.394	138.135	0.00036958	83.6364	0.276771	64.2424	30.2294	927.273	50.5865	0.612912	206.667	875.882	2373.34	138.135	0.276771
15662-33-6	Ryanodine	Insecticide	Botanical insecticide	0.0149	46.5199	56.2341	1.75	4.82091e-15	1.94484e-18	0.999911								2.99389	3.64609	2.07895	3.40366	1.90972	1832708247235938	35.231	2.86308	7.24426	1.92391		1265.24	294.217	0.137133	1147.88	3169.87	4.40702	399.394	180.655	1.70513e-14	83.6364	0.449062	64.2424	43.2704	927.273	78.4529	0.649719	206.667	1265.24	3169.87	180.655	0.449062
1570-64-5	2-METHYL-4-CHLOROPHENOL	Metabolite	Other pesticide class	0.209	3.31649	602.56	2.78	0.11413	4.60421e-05	0.999952								4.93819	8.593	3.09827	28.3715	2.76849	627.705	67.2705	4.66748	13.0741	2.07121		767.083	20.9753	0.0581869	1147.88	2127	0.5287	399.394	124.617	0.0497846	83.6364	0.235183	64.2424	26.5425	927.273	43.47	0.603512	206.667	767.083	2127	124.617	0.235183
1582-09-8	trifluralin	Herbicide	Other pesticide class	0.561	1.23556	218776	5.34	10.403	0.00419676	0.997541								5.3602	10.2847	3.31951	9999.19	2.95488	2417.81	74.2247	5.05913	14.3395	2.08875		706.69	7.81433	0.0486161	1147.88	1985.23	0.00150012	399.394	116.756	0.0129249	83.6364	0.213149	64.2424	24.4877	927.273	39.634	0.598445	206.667	706.69	1985.23	116.756	0.213149
15879-93-3	CHLORALOSE	Rodenticide, Avicide, Repellent	Other pesticide class	0.12	5.77623	10.4713	1.02	1.02247e-08	4.12483e-12	0.999685								1.51332	1.50013	1.30274	1.31224	1.25577	3.49594e+08	10.8329	1.48903	2.80481	1.53612		2503.11	36.532	0.333306	1147.88	5058.58	11.4309	399.394	274.731	8.93893e-08	83.6364	1.46045	64.2424	83.1994	927.273	202.628	0.813736	206.667	2503.11	5058.58	274.731	1.46045
1593-77-7	DODEMORPH	Fungicide	Morpholine	2.93	0.236569	501187	5.7	0.0626694	2.5282e-05	0.994431								5.36092	10.2879	3.31989	22905.8	2.9552	919396	74.2367	5.0598	14.3417	2.08877		706.595	1.49619	0.048601	1147.88	1985	0.000654857	399.394	116.743	3.39897e-05	83.6364	0.213114	64.2424	24.4845	927.273	39.628	0.598437	206.667	706.595	1985	116.743	0.213114
1596-84-5	DAMINOZIDE	Plant growth regulator	Other pesticide class	0.324	2.13934	0.0316228	-1.5	4.2723e-05	1.72352e-08	0.915701								0.872995	0.800945	0.96704	0.835129	0.972951	55576.1	0.281202	0.894784	0.884836	0.896389		4339.08	13.5304	0.624263	1147.88	6814.61	17.9613	399.394	354.591	0.000562292	83.6364	56.2617	64.2424	138.454	927.273	642.304	1.39448	206.667	4339.08	6814.61	354.591	56.2617
15972-60-8	ALACHLOR	Herbicide	Other pesticide class	0.271	2.55774	3311.31	3.52	0.00084032	3.39e-07	0.999925								5.27802	9.92855	3.27643	152.165	2.91859	455818	72.8706	4.98287	14.0931	2.08556		717.693	16.1765	0.0503598	1147.88	2011.34	0.0985772	399.394	118.208	6.8558e-05	83.6364	0.21711	64.2424	24.8625	927.273	40.327	0.59936	206.667	717.693	2011.34	118.208	0.21711
1610-18-0	PROMETON	Herbicide	Other pesticide class	0.0972	7.13114	977.237	2.99	9.1809e-05	3.70374e-08	0.999949								5.0907	9.16673	3.17822	45.4947	2.83585	1.24947e+06	69.7837	4.80902	13.5314	2.07789		744.103	45.1012	0.0545451	1147.88	2073.49	0.329709	399.394	121.657	2.50107e-05	83.6364	0.226713	64.2424	25.7613	927.273	42.001	0.601571	206.667	744.103	2073.49	121.657	0.226713
161050-58-4	RH-2485	Insecticide	Other pesticide class	1.92	0.361014	5011.87	3.7	1.71957e-06	6.93707e-10	0.999907								5.30599	10.0482	3.29109	229.883	2.93094	3.36436e+08	73.3315	5.00882	14.177	2.08665		713.91	2.28325	0.0497603	1147.88	2002.37	0.0652506	399.394	117.71	9.28854e-08	83.6364	0.215745	64.2424	24.7337	927.273	40.0884	0.599045	206.667	713.91	2002.37	117.71	0.215745
16118-49-3	Carbetamide	Herbicide	Carbamate	0.00408	169.889	42.658	1.63	1.27811e-05	5.15612e-09	0.999894								2.68883	3.12731	1.91902	2.78321	1.77498	569171	30.204	2.57997	6.32955	1.88056		1408.79	1074.47	0.159882	1147.88	3434.05	5.38946	399.394	194.368	5.49044e-05	83.6364	0.523802	64.2424	48.0186	927.273	89.7904	0.664694	206.667	1408.79	3434.05	194.368	0.523802
1646-87-3	ALDICARB SULFOXIDE	Metabolite	Other pesticide class	0.0153	45.3037	0.165959	-0.78	9.7869e-05	3.94821e-08	0.982732								0.882585	0.810647	0.972068	0.841269	0.977187	24418.6	0.439234	0.903684	0.913591	0.913889		4291.94	286.525	0.616791	1147.88	6779.36	17.8302	399.394	353.054	0.00127976	83.6364	36.0193	64.2424	137.091	927.273	622.087	1.36778	206.667	4291.94	6779.36	353.054	36.0193
1646-88-4	ALDICARB SULFONE	Insecticide, Nematicide, Metabolite	Carbamate	0.0162	42.7869	0.269153	-0.57	0.00034037	1.37311e-07	0.989268								0.889924	0.818087	0.975916	0.845985	0.980428	7056.1	0.560174	0.910495	0.935597	0.926988		4256.54	270.607	0.611182	1147.88	6752.63	17.7308	399.394	351.887	0.00442879	83.6364	28.2428	64.2424	136.065	927.273	607.455	1.34845	206.667	4256.54	6752.63	351.887	28.2428
16484-77-8	Mecoprop-P	Herbicide	Other pesticide class	1.26	0.550117	1584.89	3.2	9.0496e-05	3.65077e-08	0.999944								5.19057	9.56459	3.23058	73.2654	2.87996	2.03951e+06	71.4294	4.9017	13.8309	2.08205		729.786	3.47924	0.0522762	1147.88	2039.88	0.204735	399.394	119.793	1.53223e-05	83.6364	0.22149	64.2424	25.2742	927.273	41.0916	0.60037	206.667	729.786	2039.88	119.793	0.22149
16672-87-0	ETHEPHON	Plant growth regulator	Other pesticide class	0.0272	25.4834	0.60256	-0.22	1.88813e-09	7.61707e-13	0.995157								0.913472	0.842045	0.988261	0.861222	0.990829	1.29229e+09	0.948217	0.932348	1.00621	0.96738		4146.81	161.171	0.593793	1147.88	6668.28	17.4171	399.394	348.193	2.41819e-08	83.6364	16.6849	64.2424	132.876	927.273	564.828	1.29215	206.667	4146.81	6668.28	348.193	16.6849
16752-77-5	METHOMYL	Insecticide, Acaricide, Metabolite	Carbamate	0.0926	7.48539	3.98107	0.6	1.9897e-06	8.02681e-10	0.999233								1.13881	1.07815	1.1064	1.01562	1.09036	1.42152e+06	4.66152	1.14147	1.68187	1.25953		3326.28	47.3417	0.463757	1147.88	5956.27	14.7692	399.394	316.41	2.19835e-05	83.6364	3.39393	64.2424	108.532	927.273	337.917	0.992433	206.667	3326.28	5956.27	316.41	3.39393
1689-83-4	IOXYNIL	Herbicide, Metabolite	Other pesticide class	0.0603	11.495	2691.53	3.43	0.000136499	5.5066e-08	0.999932								5.25924	9.84912	3.26658	123.84	2.91029	2.28416e+06	72.5611	4.96544	14.0368	2.08481		720.256	72.7005	0.050766	1147.88	2017.4	0.121124	399.394	118.545	1.36812e-05	83.6364	0.218036	64.2424	24.9498	927.273	40.4888	0.599574	206.667	720.256	2017.4	118.545	0.218036
1689-84-5	BROMOXYNIL	Herbicide, Metabolite	Other pesticide class	0.237	2.92467	2454.71	3.39	1.3332e-05	5.37837e-09	0.999935								5.24962	9.80871	3.26154	113.017	2.90604	2.13441e+07	72.4026	4.95651	14.008	2.08443		721.576	18.4972	0.0509751	1147.88	2020.52	0.132723	399.394	118.718	1.4641e-06	83.6364	0.218513	64.2424	24.9947	927.273	40.5721	0.599684	206.667	721.576	2020.52	118.718	0.218513
1689-99-2	Bromoxynil octanoate	Herbicide	Other pesticide class	0.638	1.08644	251189	5.4	3.2219	0.00129977	0.997183								5.36036	10.2854	3.3196	11480.5	2.95496	8963.21	74.2275	5.05928	14.34	2.08875		706.668	6.87122	0.0486126	1147.88	1985.18	0.00130656	399.394	116.753	0.00348647	83.6364	0.213141	64.2424	24.487	927.273	39.6327	0.598443	206.667	706.668	1985.18	116.753	0.213141
1698-60-8	CHLORIDAZON	Herbicide	Other pesticide class	0.212	3.26956	13.8038	1.14	3.3633e-05	1.35682e-08	0.999752								1.68093	1.70212	1.39061	1.46454	1.3298	117670	13.5949	1.64458	3.30739	1.61694		2253.52	20.6785	0.293751	1147.88	4738.93	10.2421	399.394	259.437	0.000265572	83.6364	1.16374	64.2424	75.33	927.273	171.838	0.773067	206.667	2253.52	4738.93	259.437	1.16374
1702-17-6	3,6-DICHLOROPICOLINIC ACID	Herbicide	Other pesticide class	0.0482	14.3806	11.4815	1.06	0.00030603	1.23458e-07	0.99971								1.56572	1.56236	1.33021	1.35841	1.27892	12059.7	11.6964	1.53766	2.96193	1.5634		2419.34	90.951	0.320029	1147.88	4954.11	11.0424	399.394	269.76	0.00259127	83.6364	1.35263	64.2424	80.5681	927.273	191.879	0.799539	206.667	2419.34	4954.11	269.76	1.35263
17109-49-8	EDIFENPHOS	Fungicide	Organophosphate	0.101	6.86284	3019.95	3.48	7.6861e-05	3.10071e-08	0.999929								5.27013	9.8951	3.27229	138.849	2.9151	4.54768e+06	72.7406	4.97555	14.0695	2.08525		718.767	43.4044	0.05053	1147.88	2013.88	0.108031	399.394	118.349	6.87164e-06	83.6364	0.217498	64.2424	24.8991	927.273	40.3948	0.59945	206.667	718.767	2013.88	118.349	0.217498
173584-44-6	DPX-MP062	Insecticide	Other pesticide class	0.121	5.72849	162181	5.21	0.000489263	1.97378e-07	0.998166								5.35975	10.2827	3.31928	7412.72	2.95469	3.81112e+07	74.2173	5.05871	14.3382	2.08873		706.749	36.2301	0.0486255	1147.88	1985.37	0.00202355	399.394	116.764	8.19969e-07	83.6364	0.21317	64.2424	24.4897	927.273	39.6378	0.59845	206.667	706.749	1985.37	116.764	0.21317
1746-81-2	MONOLINURON	Herbicide	Other pesticide class	0.0742	9.34161	199.526	2.3	0.004646	1.87428e-06	0.999946								4.28761	6.52466	2.75719	9.9523	2.48114	5447.25	56.5498	4.06372	11.1234	2.03722		883.476	59.0814	0.0766323	1147.88	2390.11	1.50719	399.394	139.049	0.00573684	83.6364	0.279769	64.2424	30.486	927.273	51.0934	0.613581	206.667	883.476	2390.11	139.049	0.279769
17606-31-4	BENSULTAP	Insecticide	Other pesticide class	0.0359	19.3077	2290.87	3.36	0.1212	4.88942e-05	0.999936								5.24183	9.77613	3.25746	105.529	2.9026	2192.45	72.2742	4.94928	13.9846	2.08412		722.648	122.113	0.051145	1147.88	2023.05	0.142141	399.394	118.859	0.0142535	83.6364	0.218901	64.2424	25.0312	927.273	40.6399	0.599774	206.667	722.648	2023.05	118.859	0.218901
17804-35-2	Benomyl	Fungicide, Miticide	Imidazole	0.0476	14.5619	131.826	2.12	4.9793e-07	2.00874e-10	0.99994								3.91389	5.55547	2.56126	6.85829	2.31607	3.51961e+07	50.3913	3.71688	10.0028	2.01242		967.836	92.0975	0.0900014	1147.88	2572.95	2.18713	399.394	148.959	8.87883e-07	83.6364	0.313961	64.2424	33.3308	927.273	56.8173	0.621142	206.667	967.836	2572.95	148.959	0.313961
18181-70-9	IODOFENPHOS	Insecticide, Acaricide, Veterinary treatment	Other pesticide class	7.24	0.0957386	323594	5.51	0.45248	0.000182539	0.996384								5.36061	10.2865	3.31973	14789.5	2.95507	82218.3	74.2316	5.05952	14.3408	2.08876		706.635	0.605503	0.0486074	1147.88	1985.1	0.00101423	399.394	116.749	0.000380086	83.6364	0.213129	64.2424	24.4859	927.273	39.6306	0.59844	206.667	706.635	1985.1	116.749	0.213129
18181-80-1	ISOPROPYL 4,4'DIBROMOBENZILATE	Acaricide	Other pesticide class	2.15	0.322394	251189	5.4	0.046662	1.88243e-05	0.997183								5.36036	10.2854	3.3196	11480.5	2.95496	618889	74.2275	5.05928	14.34	2.08875		706.668	2.039	0.0486126	1147.88	1985.18	0.00130656	399.394	116.753	5.04937e-05	83.6364	0.213141	64.2424	24.487	927.273	39.6327	0.598443	206.667	706.668	1985.18	116.753	0.213141
1836-75-5	NITROFEN	Herbicide	Other pesticide class	6.83	0.101486	43651.6	4.64	0.30304	0.000122252	0.999479								5.35504	10.2619	3.31681	1995.77	2.95261	16567.1	74.1398	5.05435	14.3241	2.08855		707.371	0.641851	0.0487239	1147.88	1986.85	0.0075159	399.394	116.846	0.00188627	83.6364	0.213393	64.2424	24.5109	927.273	39.6768	0.598502	206.667	707.371	1986.85	116.846	0.213393
18467-77-1	,ALPHA,-L-XYLO-2-HEXULOFURANOSONIC ACID, 2,3:4,6	Plant growth regulator	Other pesticide class	0.237	2.92467	22.3872	1.35	0.000219392	8.85066e-08	0.999833								2.05218	2.18203	1.58524	1.85681	1.49378	22536.6	19.7126	1.98912	4.42056	1.74603		1845.85	18.4972	0.229145	1147.88	4157.1	8.07837	399.394	230.958	0.00138664	83.6364	0.802576	64.2424	62.2821	927.273	128.566	0.715911	206.667	1845.85	4157.1	230.958	0.802576
18530-56-8	NOREA	Herbicide	Other pesticide class	0.105	6.6014	190.546	2.28	0.000743076	2.9977e-07	0.999946								4.24953	6.41956	2.73723	9.54189	2.46432	32669	55.9223	4.02838	11.0092	2.0349		891.392	41.7509	0.0778869	1147.88	2407.54	1.57202	399.394	139.998	0.000956563	83.6364	0.282908	64.2424	30.7535	927.273	51.6233	0.614281	206.667	891.392	2407.54	139.998	0.282908
1861-32-1	Dimethyl tetrachloroterephthalate	Herbicide	Other pesticide class	0.0955	7.25809	19054.6	4.28	0.22018	8.88246e-05	0.999752								5.34675	10.2254	3.31246	871.655	2.94895	9959.37	74.0032	5.04665	14.2992	2.08823		708.467	45.9041	0.0488977	1147.88	1989.46	0.0172087	399.394	116.991	0.00313775	83.6364	0.213787	64.2424	24.5483	927.273	39.7458	0.598593	206.667	708.467	1989.46	116.991	0.213787
1861-40-1	Benefin	Herbicide	Other pesticide class	0.586	1.18285	194984	5.29	29.391	0.0118569	0.997804								5.36004	10.284	3.31943	8911.88	2.95481	762.732	74.2221	5.05898	14.3391	2.08874		706.711	7.48096	0.0486194	1147.88	1985.28	0.00168315	399.394	116.759	0.0409712	83.6364	0.213156	64.2424	24.4884	927.273	39.6353	0.598447	206.667	706.711	1985.28	116.759	0.213156
18691-97-9	Methabenzthiazuron	Herbicide	Other pesticide class	0.00975	71.092	436.516	2.64	5.6358e-05	2.27358e-08	0.999952								4.7974	8.09657	3.02446	20.783	2.7063	932465	64.9505	4.53682	12.652	2.06466		789.595	449.625	0.0617545	1147.88	2178.9	0.721742	399.394	127.48	3.35133e-05	83.6364	0.243584	64.2424	27.3069	927.273	44.9205	0.605428	206.667	789.595	2178.9	127.48	0.243584
18854-01-8	ISOXATHION	Insecticide	Organophosphate	1.29	0.537323	5370.32	3.73	0.188646	7.6103e-05	0.999903								5.30965	10.064	3.29301	246.264	2.93256	3285.17	73.3918	5.01222	14.188	2.0868		713.418	3.39833	0.0496822	1147.88	2001.21	0.0609102	399.394	117.645	0.00951244	83.6364	0.215568	64.2424	24.7169	927.273	40.0574	0.599004	206.667	713.418	2001.21	117.645	0.215568
1897-45-6	Chlorothalonil	Fungicide	Other pesticide class	1.29	0.537323	1122.02	3.05	0.202	8.14904e-05	0.999948								5.12379	9.29654	3.19557	52.1114	2.85046	650.277	70.329	4.83973	13.6307	2.07929		739.297	3.39833	0.0537835	1147.88	2062.23	0.287845	399.394	121.033	0.0480564	83.6364	0.224956	64.2424	25.5978	927.273	41.6952	0.601168	206.667	739.297	2062.23	121.033	0.224956
19044-88-3	ORYZALIN	Herbicide	Other pesticide class	0.0386	17.9572	5370.32	3.73	5.52329e-05	2.22819e-08	0.999903								5.30965	10.064	3.29301	246.264	2.93256	1.12204e+07	73.3918	5.01222	14.188	2.0868		713.418	113.571	0.0496822	1147.88	2001.21	0.0609102	399.394	117.645	2.78511e-06	83.6364	0.215568	64.2424	24.7169	927.273	40.0574	0.599004	206.667	713.418	2001.21	117.645	0.215568
1910-42-5	Paraquat dichloride	Herbicide	Other pesticide class	0.11	6.30134	0.00194984	-2.71	4.94727e-09	1.99582e-12	0.401209								0.870871	0.798799	0.965927	0.833773	0.972013	4.79248e+08	0.246203	0.892813	0.878467	0.892453		4349.67	39.8531	0.62594	1147.88	6822.46	17.9905	399.394	354.934	6.52064e-08	83.6364	64.2595	64.2424	138.76	927.273	646.96	1.40063	206.667	4349.67	6822.46	354.934	64.2595
1912-24-9	atrazine	Herbicide	Other pesticide class	0.117	5.92433	407.38	2.61	0.00023836	9.61587e-08	0.999951								4.76243	7.9779	3.00613	19.4515	2.69086	206421	64.3743	4.50438	12.5472	2.06297		795.392	37.4687	0.0626731	1147.88	2192.19	0.771149	399.394	128.212	0.00015139	83.6364	0.245764	64.2424	27.5036	927.273	45.2958	0.605923	206.667	795.392	2192.19	128.212	0.245764
1912-26-1	TRIETAZINE	Herbicide	Other pesticide class	0.1	6.93147	2187.76	3.34	0.162328	6.54862e-05	0.999937								5.23635	9.75327	3.25458	100.817	2.90018	1563.94	72.1839	4.9442	13.9682	2.0839		723.404	43.8384	0.0512649	1147.88	2024.84	0.148784	399.394	118.958	0.0199816	83.6364	0.219175	64.2424	25.057	927.273	40.6877	0.599837	206.667	723.404	2024.84	118.958	0.219175
1918-00-9	dicamba	Herbicide	Other pesticide class	2.48	0.279495	162.181	2.21	0.00022018	8.88246e-08	0.999943								4.10928	6.04535	2.6637	8.24557	2.40237	95443.7	53.6112	3.89822	10.5887	2.02597		921.815	1.76768	0.0827082	1147.88	2474	1.81916	399.394	143.608	0.000327418	83.6364	0.295104	64.2424	31.7803	927.273	53.6735	0.616989	206.667	921.815	2474	143.608	0.295104
1918-13-4	CHLORTHIAMID	Herbicide	Other pesticide class	0.238	2.91238	912.011	2.96	2.8886e-06	1.16531e-09	0.99995								5.07257	9.09648	3.16872	42.5138	2.82784	3.71162e+07	69.4851	4.7922	13.4771	2.07712		746.761	18.4195	0.0549663	1147.88	2079.7	0.352827	399.394	122.001	8.4195e-07	83.6364	0.227688	64.2424	25.8517	927.273	42.1703	0.601795	206.667	746.761	2079.7	122.001	0.227688
1918-16-7	PROPACHLOR	Herbicide	Other pesticide class	0.0954	7.26569	151.356	2.18	0.03636	1.46683e-05	0.999942								4.04596	5.88273	2.63051	7.75086	2.3744	543.74	52.5677	3.83945	10.3988	2.02173		936.242	45.9522	0.0849946	1147.88	2505.22	1.93527	399.394	145.3	0.0574723	83.6364	0.300962	64.2424	32.2667	927.273	54.6535	0.618284	206.667	936.242	2505.22	145.3	0.300962
1929-77-7	VERNOLATE	Herbicide	Other pesticide class	0.168	4.12588	6918.31	3.84	3.1209	0.00125903	0.999886								5.32115	10.1137	3.29904	317.01	2.93764	255.595	73.5812	5.02289	14.2224	2.08724		711.877	26.0943	0.049438	1147.88	1997.55	0.0473172	399.394	117.441	0.122264	83.6364	0.215013	64.2424	24.6644	927.273	39.9603	0.598876	206.667	711.877	1997.55	117.441	0.215013
1929-82-4	NITRAPYRIN	Bactericide	Other pesticide class	0.95	0.729629	2570.4	3.41	2.0503	0.000827128	0.999933								5.25454	9.82933	3.26412	118.304	2.90821	145.276	72.4836	4.96107	14.0227	2.08463		720.901	4.61457	0.0508682	1147.88	2018.92	0.126792	399.394	118.629	0.215108	83.6364	0.218269	64.2424	24.9718	927.273	40.5295	0.599628	206.667	720.901	2018.92	118.629	0.218269
1929-88-0	Benzthiazuron	Herbicide	Other pesticide class	0.00411	168.649	125.893	2.1	0.00153365	6.18702e-07	0.999939								3.86835	5.44621	2.53739	6.58714	2.29596	10982.4	49.6409	3.67462	9.86628	2.00906		979.229	1066.63	0.091807	1147.88	2597.16	2.27716	399.394	150.264	0.00284547	83.6364	0.318707	64.2424	33.7141	927.273	57.6036	0.62218	206.667	979.229	2597.16	150.264	0.318707
19666-30-9	OXADIAZON	Herbicide	Other pesticide class	23.1	0.0300064	63095.7	4.8	0.0073427	2.96218e-06	0.999263								5.35703	10.2706	3.31785	2884.39	2.95348	988158	74.1725	5.05619	14.33	2.08863		707.109	0.189777	0.0486824	1147.88	1986.23	0.0052004	399.394	116.811	3.16245e-05	83.6364	0.213299	64.2424	24.502	927.273	39.6603	0.59848	206.667	707.109	1986.23	116.811	0.213299
1967-16-4	CHLORBUFAM	Herbicide	Other pesticide class	0.129	5.37323	1047.13	3.02	0.00086961	3.50816e-07	0.999949								5.10775	9.23338	3.18716	48.6889	2.84338	141152	70.0647	4.82484	13.5826	2.07861		741.618	33.9833	0.0541514	1147.88	2067.67	0.308079	399.394	121.334	0.000221393	83.6364	0.225804	64.2424	25.6768	927.273	41.8429	0.601363	206.667	741.618	2067.67	121.334	0.225804
1982-47-4	CHLOROXURON	Herbicide	Other pesticide class	0.472	1.46853	5011.87	3.7	4.0703e-05	1.64203e-08	0.999907								5.30599	10.0482	3.29109	229.883	2.93094	1.42134e+07	73.3315	5.00882	14.177	2.08665		713.91	9.2878	0.0497603	1147.88	2002.37	0.0652506	399.394	117.71	2.19863e-06	83.6364	0.215745	64.2424	24.7337	927.273	40.0884	0.599045	206.667	713.91	2002.37	117.71	0.215745
1982-49-6	SIDURON	Herbicide	Other pesticide class	0.0545	12.7183	6309.57	3.8	6.8579e-06	2.7666e-09	0.999893								5.31729	10.097	3.29702	289.19	2.93593	1.06112e+08	73.5177	5.01931	14.2109	2.08709		712.393	80.4374	0.0495198	1147.88	1998.78	0.0518691	399.394	117.509	2.94499e-07	83.6364	0.215198	64.2424	24.682	927.273	39.9928	0.598919	206.667	712.393	1998.78	117.509	0.215198
19937-59-8	METOXURON	Herbicide	Other pesticide class	0.211	3.28506	43.6516	1.64	0.0014443	5.82656e-07	0.999896								2.7138	3.16801	1.93211	2.82862	1.78601	5115.87	30.6154	2.60314	6.40442	1.88449		1395.83	20.7765	0.157828	1147.88	3410.79	5.30294	399.394	193.168	0.00610844	83.6364	0.516762	64.2424	47.5912	927.273	88.7408	0.663308	206.667	1395.83	3410.79	193.168	0.516762
2008-41-5	BUTYLATE	Herbicide	Other pesticide class	0.209	3.31649	14125.4	4.15	8.5345	0.00344297	0.999806								5.34164	10.203	3.30978	646.382	2.94669	190.544	73.9189	5.0419	14.2839	2.08803		709.146	20.9753	0.0490053	1147.88	1991.07	0.0232061	399.394	117.081	0.164004	83.6364	0.214031	64.2424	24.5714	927.273	39.7885	0.598649	206.667	709.146	1991.07	117.081	0.214031
2008-58-4	2,6-DICHLOROBENZAMIDE	Metabolite	Other pesticide class	0.0555	12.4891	5.88844	0.77	4.40851e-05	1.77847e-08	0.999469								1.25623	1.20631	1.16795	1.10279	1.14222	69131.4	6.59635	1.25044	2.03393	1.36586		3015.38	78.9881	0.414488	1147.88	5642.35	13.6018	399.394	302.044	0.000452037	83.6364	2.39843	64.2424	99.0744	927.273	279.426	0.915175	206.667	3015.38	5642.35	302.044	2.39843
20301-63-7	Phosphorodithioic acid, S-[2-(ethylsulfonyl)ethy	Metabolite	Other pesticide class	0.104	6.66488	7.07946	0.85	0.00294576	1.18837e-06	0.999552								1.32629	1.28454	1.20468	1.15722	1.17316	1081.07	7.75089	1.31546	2.24401	1.41945		2856.09	42.1523	0.389245	1147.88	5470.31	12.962	399.394	294.077	0.0289065	83.6364	2.04117	64.2424	94.1774	927.273	253.267	0.880622	206.667	2856.09	5470.31	294.077	2.04117
2032-59-9	AMINOCARB	Insecticide	Carbamate	0.0142	48.8132	79.4328	1.9	0.0145972	5.88876e-06	0.999926								3.38031	4.37782	2.28153	4.46387	2.08039	787.975	41.5986	3.22169	8.4029	1.96717		1120.61	308.721	0.114212	1147.88	2888.41	3.36031	399.394	165.834	0.0396586	83.6364	0.380323	64.2424	38.4539	927.273	67.6354	0.635431	206.667	1120.61	2888.41	165.834	0.380323
2032-65-7	METHIOCARB	Insecticide, Molluscicide, Bird repellent	Carbamate	0.0607	11.4192	831.764	2.92	0.00011918	4.80793e-08	0.99995								5.04665	8.99699	3.15513	38.8464	2.8164	822192	69.0579	4.76815	13.3994	2.076		750.596	72.2214	0.0555741	1147.88	2088.66	0.386136	399.394	122.497	3.80082e-05	83.6364	0.229096	64.2424	25.9821	927.273	42.4149	0.602118	206.667	750.596	2088.66	122.497	0.229096
2079-00-7	BLASTICIDIN-S	Fungicide	Other pesticide class	2.6e-05	26659.5	2.0893e-05	-4.68	9.85717e-18	3.97656e-21	0.00712853								0.870733	0.798659	0.965854	0.833685	0.971952	2.4051e+17	0.243927	0.892684	0.878053	0.892196		4350.36	168609	0.626049	1147.88	6822.97	17.9924	399.394	354.956	1.29932e-16	83.6364	64.8591	64.2424	138.78	927.273	647.265	1.40104	206.667	4350.36	6822.97	354.956	64.8591
2104-64-5	EPN	Insecticide, Acaricide	Organophosphate	1.95	0.35546	60256	4.78	0.044844	1.80909e-05	0.999295								5.35682	10.2697	3.31774	2754.61	2.95339	154520	74.169	5.05599	14.3294	2.08862		707.136	2.24812	0.0486868	1147.88	1986.29	0.00544541	399.394	116.815	0.000202239	83.6364	0.213309	64.2424	24.5029	927.273	39.6621	0.598482	206.667	707.136	1986.29	116.815	0.213309
2104-96-3	BROMOPHOS	Insecticide	Other pesticide class	11.8	0.0587413	162181	5.21	20.705	0.00835277	0.998166								5.35975	10.2827	3.31928	7412.72	2.95469	900.575	74.2173	5.05871	14.3382	2.08873		706.749	0.371512	0.0486255	1147.88	1985.37	0.00202355	399.394	116.764	0.0347	83.6364	0.21317	64.2424	24.4897	927.273	39.6378	0.59845	206.667	706.749	1985.37	116.764	0.21317
21087-64-9	METRIBUZIN	Herbicide	Other pesticide class	0.131	5.2912	50.1187	1.7	1.1817e-05	4.76719e-09	0.999904								2.86557	3.42202	2.01167	3.12418	1.85304	688187	33.1163	2.74399	6.85948	1.90685		1321.9	33.4644	0.146112	1147.88	3275.89	4.80127	399.394	186.18	4.54092e-05	83.6364	0.477738	64.2424	45.1484	927.273	82.8538	0.655532	206.667	1321.9	3275.89	186.18	0.477738
21564-17-0	2-(THIOCYANATEMETHYLTHIO)BENZOTHIAZOLE	Fungicide, Microbiocide, Wood preservative	Other pesticide class	0.0865	8.01326	1995.26	3.3	7.93196e-05	3.19989e-08	0.99994								5.22465	9.70465	3.24845	92.0198	2.89501	2.92163e+06	71.991	4.93333	13.9331	2.08343		725.025	50.6802	0.0515217	1147.88	2028.66	0.163008	399.394	119.17	1.06961e-05	83.6364	0.219762	64.2424	25.1122	927.273	40.7902	0.599972	206.667	725.025	2028.66	119.17	0.219762
21609-90-5	LEPTOPHOS	Insecticide	Organophosphate	14.1	0.0491594	2.04174e+06	6.31	0.26765	0.000107975	0.977804								5.36135	10.2897	3.32011	93311	2.95539	876955	74.2437	5.0602	14.343	2.08879		706.539	0.310911	0.0485921	1147.88	1984.87	0.000160753	399.394	116.736	3.56347e-05	83.6364	0.213094	64.2424	24.4826	927.273	39.6245	0.598432	206.667	706.539	1984.87	116.736	0.213094
2163-80-6	MSMA	Herbicide	Other pesticide class	0.00849	81.6428	0.000794328	-3.1	2.79224e-09	1.12644e-12	0.214431								0.870789	0.798715	0.965883	0.833721	0.971976	8.49079e+08	0.24484	0.892736	0.878219	0.892299		4350.08	516.353	0.626005	1147.88	6822.77	17.9916	399.394	354.947	3.68046e-08	83.6364	64.6173	64.2424	138.772	927.273	647.143	1.40088	206.667	4350.08	6822.77	354.947	64.6173
2164-17-2	FLUOMETURON	Herbicide	Other pesticide class	0.133	5.21163	263.027	2.42	0.00026361	1.06345e-07	0.999949								4.49696	7.1312	2.86695	12.8544	2.5736	123697	59.9996	4.258	11.7511	2.04926		842.347	32.9612	0.0701145	1147.88	2298.61	1.16692	399.394	134.053	0.000252633	83.6364	0.263683	64.2424	29.095	927.273	48.3641	0.609976	206.667	842.347	2298.61	134.053	0.263683
21725-46-2	CYANAZINE	Herbicide	Other pesticide class	0.0853	8.12599	165.959	2.22	2.5957e-07	1.04715e-10	0.999944								4.12997	6.09931	2.67455	8.41822	2.41151	8.26331e+07	53.9521	3.91742	10.6507	2.02732		917.198	51.3932	0.0819765	1147.88	2463.97	1.78185	399.394	143.064	3.78178e-07	83.6364	0.29324	64.2424	31.6246	927.273	53.3609	0.616576	206.667	917.198	2463.97	143.064	0.29324
21757-82-4	ACETIC ACID, 1-(3,4-DICHLOROPHENYL)-2,2,2-TRICHL	Insecticide	Other pesticide class	1.11	0.624457	83176.4	4.92	0.0477282	1.92544e-05	0.999041								5.3581	10.2754	3.31841	3802.1	2.95396	200388	74.1902	5.05719	14.3332	2.08867		706.967	3.94941	0.0486599	1147.88	1985.89	0.00394518	399.394	116.792	0.000155947	83.6364	0.213248	64.2424	24.4972	927.273	39.6514	0.598468	206.667	706.967	1985.89	116.792	0.213248
2212-67-1	MOLINATE	Herbicide	Other pesticide class	0.109	6.35915	1621.81	3.21	0.4141	0.000167055	0.999943								5.19431	9.57987	3.23254	74.9526	2.88161	455.956	71.4911	4.90518	13.8421	2.0822		729.259	40.2187	0.0521928	1147.88	2038.64	0.200127	399.394	119.725	0.0685374	83.6364	0.221299	64.2424	25.2563	927.273	41.0582	0.600326	206.667	729.259	2038.64	119.725	0.221299
22212-55-1	BENZOYLPROP ETHYL	Herbicide	Other pesticide class	0.17	4.07734	18620.9	4.27	2.51492e-05	1.01456e-08	0.999756								5.34641	10.2239	3.31228	851.832	2.9488	8.52113e+07	73.9976	5.04634	14.2982	2.08822		708.512	25.7873	0.0489049	1147.88	1989.56	0.0176091	399.394	116.997	3.66735e-07	83.6364	0.213803	64.2424	24.5498	927.273	39.7486	0.598596	206.667	708.512	1989.56	116.997	0.213803
22224-92-6	FENAMIPHOS	Nematicide	Organophosphate	0.898	0.771879	1698.24	3.23	0.00012221	4.93017e-08	0.999943								5.20157	9.60956	3.23635	78.4457	2.88482	1.61687e+06	71.6107	4.91191	13.8639	2.0825		728.242	4.88178	0.0520315	1147.88	2036.25	0.191215	399.394	119.592	1.93274e-05	83.6364	0.220929	64.2424	25.2217	927.273	40.9938	0.600241	206.667	728.242	2036.25	119.592	0.220929
22248-79-9	TETRACHLORVINPHOS	Insecticide, Acaricide, Veterinary treatment	Organophosphate	1.57	0.441495	3388.44	3.53	0.00018584	7.49712e-08	0.999925								5.27989	9.93648	3.27741	155.69	2.91941	2.1088e+06	72.9013	4.9846	14.0987	2.08563		717.44	2.79225	0.0503196	1147.88	2010.74	0.0963453	399.394	118.174	1.48188e-05	83.6364	0.217018	64.2424	24.8539	927.273	40.311	0.599339	206.667	717.44	2010.74	118.174	0.217018
2227-13-6	TETRASUL	Acaricide, Insecticide, Nematicide	Other pesticide class	99.3	0.00698033	7.4131e+06	6.87	3.2549	0.00131309	0.923939								5.36145	10.2902	3.32017	338789	2.95544	261820	74.2453	5.06029	14.3433	2.08879		706.526	0.0441474	0.04859	1147.88	1984.84	4.42753e-05	399.394	116.734	0.000119357	83.6364	0.213089	64.2424	24.4821	927.273	39.6237	0.598431	206.667	706.526	1984.84	116.734	0.213089
2227-17-0	DIENOCHLOR	Acaricide, Insecticide	Organochlorine	685	0.00101189	2.45471e+08	8.39	5.5146	0.00222469	0.268473								5.36148	10.2903	3.32019	1.12183e+07	2.95545	5.11713e+06	74.2459	5.06032	14.3434	2.0888		706.521	0.00639977	0.0485893	1147.88	1984.83	1.3371e-06	399.394	116.733	6.10694e-06	83.6364	0.213088	64.2424	24.482	927.273	39.6234	0.598431	206.667	706.521	1984.83	116.733	0.213088
2274-67-1	PHOSPHORIC ACID,2-CHLORO-(2,4-DICHLOROPHENYL)VIN	Insecticide	Organophosphate	1.12	0.618881	1348.96	3.13	0.0033027	1.33237e-06	0.999946								5.162	9.44891	3.2156	62.4831	2.86734	47671.6	70.9587	4.87519	13.7452	2.08088		733.824	3.91414	0.0529162	1147.88	2049.38	0.240065	399.394	120.32	0.000655526	83.6364	0.222959	64.2424	25.4116	927.273	41.3476	0.600708	206.667	733.824	2049.38	120.32	0.222959
2275-14-1	PHENKAPTON	Insecticide, Acaricide	Organophosphate	18	0.0385082	691831	5.84	0.872891	0.00035214	0.992343								5.36108	10.2885	3.31997	31618.4	2.95527	91115.7	74.2392	5.05995	14.3422	2.08878		706.574	0.243547	0.0485977	1147.88	1984.96	0.000474407	399.394	116.74	0.00034297	83.6364	0.213107	64.2424	24.4838	927.273	39.6267	0.598435	206.667	706.574	1984.96	116.74	0.213107
2275-23-2	VAMIDOTHION	Insecticide, Acaricide	Organophosphate	0.00242	286.424	1.44544	0.16	5.24856e-08	2.11736e-11	0.997954								0.971913	0.902075	1.0189	0.899743	1.01664	4.83353e+07	1.91124	0.986584	1.18144	1.05798		3897.47	1811.5	0.554278	1147.88	6467.77	16.6714	399.394	339.353	6.46525e-07	83.6364	8.27783	64.2424	125.571	927.273	481.053	1.1815	206.667	3897.47	6467.77	339.353	8.27783
22781-23-3	BENDIOCARB	Insecticide, Veterinary treatment	Carbamate	0.0636	10.8985	50.1187	1.7	0.003939	1.58906e-06	0.999904								2.86557	3.42202	2.01167	3.12418	1.85304	2064.56	33.1163	2.74399	6.85948	1.90685		1321.9	68.9283	0.146112	1147.88	3275.89	4.80127	399.394	186.18	0.0151364	83.6364	0.477738	64.2424	45.1484	927.273	82.8538	0.655532	206.667	1321.9	3275.89	186.18	0.477738
22936-75-0	DIMETHAMRTRYNE	Herbicide	Other pesticide class	0.192	3.61014	7943.28	3.9	0.00095041	3.83412e-07	0.999875								5.32631	10.1361	3.30174	363.852	2.93992	963286	73.6663	5.02768	14.2379	2.08744		711.186	22.8325	0.0493287	1147.88	1995.91	0.0412255	399.394	117.35	3.2441e-05	83.6364	0.214764	64.2424	24.6409	927.273	39.9169	0.598819	206.667	711.186	1995.91	117.35	0.214764
23031-36-9	PRALLETHRIN	Insecticide	Pyrethroid	0.207	3.34854	30903	4.49	0.134179	5.41301e-05	0.99962								5.35239	10.2502	3.31542	1413.14	2.95144	26493.9	74.0961	5.05188	14.3161	2.08845		707.721	21.178	0.0487795	1147.88	1987.68	0.0106147	399.394	116.892	0.00117952	83.6364	0.213519	64.2424	24.5229	927.273	39.6988	0.598531	206.667	707.721	1987.68	116.892	0.213519
2303-16-4	diallate	Herbicide	Other pesticide class	0.654	1.05986	30903	4.49	0.3838	0.000154832	0.99962								5.35239	10.2502	3.31542	1413.14	2.95144	9262.43	74.0961	5.05188	14.3161	2.08845		707.721	6.70312	0.0487795	1147.88	1987.68	0.0106147	399.394	116.892	0.00337385	83.6364	0.213519	64.2424	24.5229	927.273	39.6988	0.598531	206.667	707.721	1987.68	116.892	0.213519
2303-17-5	triallate	Herbicide	Other pesticide class	1.06	0.653912	39810.7	4.6	1.212	0.000488942	0.999521								5.35442	10.2592	3.31648	1820.24	2.95233	3778	74.1296	5.05377	14.3222	2.08853		707.453	4.1357	0.0487369	1147.88	1987.04	0.00824069	399.394	116.857	0.00827156	83.6364	0.213422	64.2424	24.5137	927.273	39.682	0.598508	206.667	707.453	1987.04	116.857	0.213422
2307-68-8	PENTANOCHLOR	Herbicide	Other pesticide class	0.582	1.19097	20417.4	4.31	0.0322299	1.30021e-05	0.999736								5.34773	10.2297	3.31298	933.935	2.94938	72898.6	74.0194	5.04756	14.3022	2.08827		708.337	7.53237	0.0488771	1147.88	1989.15	0.0160611	399.394	116.974	0.000428678	83.6364	0.21374	64.2424	24.5438	927.273	39.7376	0.598582	206.667	708.337	1989.15	116.974	0.21374
2310-17-0	PHOSALONE	Insecticide, Acaricide	Organophosphate	1.25	0.554518	23988.3	4.38	0.00186513	7.52426e-07	0.999697								5.34978	10.2387	3.31405	1097.13	2.95028	1.47981e+06	74.053	5.04946	14.3083	2.08835		708.067	3.50707	0.0488343	1147.88	1988.51	0.013672	399.394	116.938	2.11176e-05	83.6364	0.213643	64.2424	24.5346	927.273	39.7206	0.598559	206.667	708.067	1988.51	116.938	0.213643
23103-98-2	PIRIMICARB	Insecticide	Carbamate	0.00949	73.0397	50.1187	1.7	8.5345e-05	3.44297e-08	0.999904								2.86557	3.42202	2.01167	3.12418	1.85304	95287.4	33.1163	2.74399	6.85948	1.90685		1321.9	461.943	0.146112	1147.88	3275.89	4.80127	399.394	186.18	0.000327955	83.6364	0.477738	64.2424	45.1484	927.273	82.8538	0.655532	206.667	1321.9	3275.89	186.18	0.477738
2312-35-8	PROPARGITE	Acaricide	Other pesticide class	3.47	0.199754	100000	5	0.06464	2.60769e-05	0.998854								5.35867	10.2779	3.31871	4570.97	2.95421	177880	74.1996	5.05771	14.3349	2.08869		706.892	1.26335	0.048648	1147.88	1985.71	0.00328158	399.394	116.783	0.00017568	83.6364	0.213221	64.2424	24.4946	927.273	39.6467	0.598462	206.667	706.892	1985.71	116.783	0.213221
23135-22-0	OXAMYL	Insecticide, Acaricide, Nematicide	Carbamate	0.0138	50.2281	0.338844	-0.47	2.3937e-05	9.65661e-09	0.991449								0.894867	0.823105	0.978507	0.84917	0.982611	100668	0.641624	0.915082	0.950418	0.935669		4233.03	317.67	0.607456	1147.88	6734.75	17.6643	399.394	351.105	0.000310426	83.6364	24.6576	64.2424	135.383	927.273	597.983	1.33594	206.667	4233.03	6734.75	351.105	24.6576
23184-66-9	BUTACHLOR	Herbicide	Other pesticide class	0.541	1.28123	31622.8	4.5	0.005151	2.07801e-06	0.999612								5.3526	10.2511	3.31553	1446.04	2.95153	706206	74.0995	5.05208	14.3167	2.08846		707.694	8.10322	0.0487751	1147.88	1987.62	0.0103732	399.394	116.889	4.42505e-05	83.6364	0.213509	64.2424	24.5219	927.273	39.6971	0.598528	206.667	707.694	1987.62	116.889	0.213509
23560-59-0	Heptenophos	Insecticide	Organophosphate	0.56	1.23776	208.93	2.32	0.017069	6.88594e-06	0.999947								4.32479	6.62876	2.77668	10.382	2.49756	1546.01	57.1624	4.09822	11.2349	2.03945		875.882	7.82829	0.0754288	1147.88	2373.34	1.4448	399.394	138.135	0.0202133	83.6364	0.276771	64.2424	30.2294	927.273	50.5865	0.612912	206.667	875.882	2373.34	138.135	0.276771
[truncated: 455 more rows]
[truncated: 23 more columns]

## Sheet: Note
Pesticides and their basic physicochemical data were obtained from current databases.
[truncated: 6 more rows]
