# Supplementary material for: Screening of pesticide distributions in foods of animal origin: a matrix-based approach for biotransfer factor modeling of grazing mammals
Source: Royal Society of Chemistry journal article supplement (doi:10.1039/d1em00454a), 2022-01-01
Supplement: d1em00454a2.pdf [file d1em00454a2.pdf]

Supplementary file

**Screening of pesticides in foods of animal origin: A matrix-based approach for biotransfer  
factor modeling of grazing mammals**

Zijian Li<sup>a\*</sup>, Jie Xiong<sup>a</sup>, Peter Fantke<sup>b</sup>

<sup>a</sup> School of Public Health (Shenzhen), Sun Yat-sen University, Shenzhen, Guangdong 518107,  
China

<sup>b</sup> Quantitative Sustainability Assessment, Department of Technology, Management and  
Economics, Technical University of Denmark, Produktionstorvet 424, 2800 Kgs. Lyngby,  
Denmark

\*Corresponding author: Tel.: +86 13644302865, lizijian3@mail.sysu.edu.cn

## **Table of Contents**

- S1. Complete pesticide fate and distribution models in animal bodies
- S2. Estimation of  $E_{\text{uptake}}$  values
- S3. Estimation of  $k_{m,\text{Liver}}$  values
- S4. Estimation of partition coefficients
- S5. Physiological variables
- S6. Derivation of BTF values
- S7. Uptake-to-elimination ratios
- S8. Model parameterization (log BTF vs log  $K_{ow}$ )
- S9. Linear relationships of BTFs among cattle and sheep products
- S10. Model evaluation
- S11. Sensitivity analysis
- S12. Uncertainty analysis

## S1. Complete pesticide fate and distribution models in animal bodies

In the liver compartment in the steady state:

$$\frac{dm_{\text{Liver}}}{dt} = E_{\text{uptake}} IR_{\text{Food}} C_{\text{Food}} + k_{\text{Blood} \rightarrow \text{Liver}}^+ m_{\text{Blood}} - (k_{\text{Liver} \rightarrow \text{Blood}}^- + k_{\text{m,Liver}} + k_{\text{e,Bile}}) m_{\text{Liver}} = 0 \quad (\text{A1a})$$

$$k_{\text{Blood} \rightarrow \text{Liver}}^+ = \frac{Q_{\text{Blood} \Leftrightarrow \text{Liver}}}{M_{\text{Blood}}} \quad (\text{A1b})$$

$$k_{\text{Liver} \rightarrow \text{Blood}}^- = \frac{Q_{\text{Blood} \Leftrightarrow \text{Liver}}}{M_{\text{Liver}} K_{\text{Liver/Blood}}} \quad (\text{A1c})$$

$$k_{\text{e,Bile}} = \frac{ER_{\text{Bile}}}{M_{\text{Liver}} K_{\text{Liver/Bile}}} \quad (\text{A1d})$$

where  $C_{\text{Food}}$  ( $\text{mg kg}^{-1}$ ) is the pesticide concentration in the food;  $m_{\text{Liver}}$  ( $\text{mg}$ ) and  $m_{\text{Blood}}$  ( $\text{mg}$ ) are pesticide masses in liver and blood, respectively;  $E_{\text{uptake}}$  (unitless) is the gut lumen-to-liver uptake efficiency (considering the first pass effect);  $IR_{\text{Food}}$  ( $\text{kg day}^{-1}$ ) is the food intake rate;  $k_{\text{Blood} \rightarrow \text{Liver}}^+$  ( $\text{day}^{-1}$ ),  $k_{\text{Liver} \rightarrow \text{Blood}}^-$  ( $\text{day}^{-1}$ ),  $k_{\text{m,Liver}}$  ( $\text{day}^{-1}$ ), and  $k_{\text{e,Bile}}$  ( $\text{day}^{-1}$ ) are the blood-to-liver uptake rate constant, liver-to-blood elimination rate constant, metabolic rate constant, and elimination rate constant via biliary excretion, respectively;  $M_{\text{Blood}}$  ( $\text{kg}$ ) and  $M_{\text{Liver}}$  ( $\text{kg}$ ) are blood and liver masses, respectively;  $Q_{\text{Blood} \Leftrightarrow \text{Liver}}$  ( $\text{kg day}^{-1}$ ) is the blood flow of liver;  $K_{\text{Liver/Blood}}$  and  $K_{\text{Liver/Bile}}$  are the liver-to-blood and liver-to-bile partition coefficients, respectively; and  $ER_{\text{Bile}}$  ( $\text{kg day}^{-1}$ ) is the bile excretion rate. The estimation of pesticide  $E_{\text{uptake}}$  values is provided in S2, and the estimation of pesticide  $k_{\text{m,Liver}}$  values is provided in S3.

In the kidney compartment in the steady state:

$$\frac{dm_{\text{Kidney}}}{dt} = k_{\text{Blood} \rightarrow \text{Kidney}}^+ m_{\text{Blood}} - (k_{\text{Kidney} \rightarrow \text{Blood}}^- + k_{\text{e,Urine}}) m_{\text{Kidney}} = 0 \quad (\text{A2a})$$

$$k_{\text{Blood} \rightarrow \text{Kidney}}^+ = \frac{Q_{\text{Blood} \Leftrightarrow \text{Kidney}}}{M_{\text{Blood}}} \quad (\text{A2b})$$

$$k_{\text{Kidney} \rightarrow \text{Blood}}^- = \frac{Q_{\text{Blood} \Leftrightarrow \text{Kidney}}}{M_{\text{Kidney}} K_{\text{Kidney/Blood}}} \quad (\text{A2c})$$

$$k_{e,Urine} = \frac{ER_{Urine}}{M_{Kidney}K_{Kidney/Urine}} \quad (A2d)$$

where  $m_{Kidney}$  (mg) is the pesticide mass in the kidney;  $Q_{Blood \leftrightarrow Kidney}$  ( $kg \text{ day}^{-1}$ ) is the blood flow of kidney;  $k_{Blood \rightarrow Kidney}^+$  ( $day^{-1}$ ),  $k_{Kidney \rightarrow Blood}^-$  ( $day^{-1}$ ), and  $k_{e,Urine}$  ( $day^{-1}$ ) are the blood-to-kidney uptake rate constant, kidney-to-blood elimination rate constant, and elimination rate constant via urinary excretion, respectively;  $M_{Kidney}$  (kg) is the mass of the kidney;  $K_{Kidney/Blood}$  and  $K_{Kidney/Urine}$  are the kidney-to-blood and kidney-to-urine partition coefficients, respectively; and  $ER_{Urine}$  ( $kg \text{ day}^{-1}$ ) is the urine excretion rate.

In the lung compartment in the steady state:

$$\frac{dm_{Lung}}{dt} = k_{Blood \rightarrow Lung}^+ m_{Blood} - (k_{Lung \rightarrow Blood}^- + k_{e,Exhalation}) m_{Lung} = 0 \quad (A3a)$$

$$k_{Blood \rightarrow Lung}^+ = \frac{Q_{Blood \leftrightarrow Lung}}{M_{Blood}} \quad (A3b)$$

$$k_{Lung \rightarrow Blood}^- = \frac{Q_{Blood \leftrightarrow Lung}}{M_{Lung}K_{Lung/Blood}} \quad (A3c)$$

$$k_{e,Exhalation} = \frac{ER_{Exhalation}}{M_{Lung}K_{Lung/Air}} \quad (A3d)$$

where  $m_{Lung}$  ( $mg \text{ kg}^{-1}$ ) is the pesticide mass in the lung;  $Q_{Blood \leftrightarrow Lung}$  ( $kg \text{ day}^{-1}$ ) is the blood flow of lung;  $k_{Blood \rightarrow Lung}^+$  ( $day^{-1}$ ),  $k_{Lung \rightarrow Blood}^-$  ( $day^{-1}$ ), and  $k_{e,Exhalation}$  ( $day^{-1}$ ) are the blood-to-lung uptake rate constant, lung-to-blood elimination rate constant, and elimination rate constant via exhalation, respectively;  $M_{Lung}$  (kg) is the mass of the lung;  $K_{Lung/Blood}$  and  $K_{Lung/Air}$  are the lung-to-blood and lung-to-air partition coefficients, respectively; and  $ER_{Exhalation}$  ( $kg \text{ day}^{-1}$ ) is the exhalation rate.

In the fat (or adipose tissue) compartment in the steady state:

$$\frac{dm_{Fat}}{dt} = k_{Blood \rightarrow Fat}^+ m_{Blood} - k_{Fat \rightarrow Blood}^- m_{Fat} = 0 \quad (A4a)$$

$$k_{Blood \rightarrow Fat}^+ = \frac{Q_{Blood \leftrightarrow Fat}}{M_{Blood}} \quad (A4b)$$

$$k_{\text{Fat} \rightarrow \text{Blood}}^- = \frac{Q_{\text{Blood} \Leftrightarrow \text{Fat}}}{M_{\text{Fat}} K_{\text{Fat}/\text{Blood}}} \quad (\text{A4c})$$

where  $m_{\text{Fat}}$  ( $\text{mg kg}^{-1}$ ) is the pesticide mass in fat;  $Q_{\text{Blood} \Leftrightarrow \text{Fat}}$  ( $\text{kg day}^{-1}$ ) is the blood flow of lung;  $k_{\text{Blood} \rightarrow \text{Fat}}^+$  ( $\text{day}^{-1}$ ) and  $k_{\text{Fat} \rightarrow \text{Blood}}^-$  ( $\text{day}^{-1}$ ) are the blood-to-fat uptake rate constant and fat-to-blood elimination rate constant, respectively;  $M_{\text{Fat}}$  ( $\text{kg}$ ) is the mass of the fat;  $K_{\text{Fat}/\text{Blood}}$  is the fat-to-blood partition coefficient.

In the muscle compartment in the steady state:

$$\frac{dm_{\text{Muscle}}}{dt} = k_{\text{Blood} \rightarrow \text{Muscle}}^+ m_{\text{Blood}} - k_{\text{Muscle} \rightarrow \text{Blood}}^- m_{\text{Muscle}} = 0 \quad (\text{A5a})$$

$$k_{\text{Blood} \rightarrow \text{Muscle}}^+ = \frac{Q_{\text{Blood} \Leftrightarrow \text{Muscle}}}{M_{\text{Blood}}} \quad (\text{A5b})$$

$$k_{\text{Muscle} \rightarrow \text{Blood}}^- = \frac{Q_{\text{Blood} \Leftrightarrow \text{Muscle}}}{M_{\text{Muscle}} K_{\text{Muscle}/\text{Blood}}} \quad (\text{A5c})$$

where  $m_{\text{Muscle}}$  ( $\text{mg kg}^{-1}$ ) is the pesticide mass in fat;  $Q_{\text{Blood} \Leftrightarrow \text{Muscle}}$  ( $\text{kg day}^{-1}$ ) is the blood flow of lung;  $k_{\text{Blood} \rightarrow \text{Muscle}}^+$  ( $\text{day}^{-1}$ ) and  $k_{\text{Muscle} \rightarrow \text{Blood}}^-$  ( $\text{day}^{-1}$ ) are the blood-to-muscle uptake rate constant and muscle-to-blood elimination rate constant, respectively;  $M_{\text{Muscle}}$  ( $\text{kg}$ ) is the mass of the muscle;  $K_{\text{Muscle}/\text{Blood}}$  is the muscle-to-blood partition coefficient.

In the mammary gland compartment in the steady state:

$$\frac{dm_{\text{Mammary gland}}}{dt} = k_{\text{Blood} \rightarrow \text{Mammary gland}}^+ m_{\text{Blood}} - (k_{\text{Mammary gland} \rightarrow \text{Blood}}^- + k_{e, \text{Milk}}) m_{\text{Mammary gland}} = 0 \quad (\text{A6a})$$

$$k_{\text{Blood} \rightarrow \text{Mammary gland}}^+ = \frac{Q_{\text{Blood} \Leftrightarrow \text{Mammary gland}}}{M_{\text{Blood}}} \quad (\text{A6b})$$

$$k_{\text{Mammary gland} \rightarrow \text{Blood}}^- = \frac{Q_{\text{Blood} \Leftrightarrow \text{Mammary gland}}}{M_{\text{Mammary gland}} K_{\text{Mammary gland}/\text{Blood}}} \quad (\text{A6c})$$

$$k_{e, \text{Milk}} = \frac{ER_{\text{Milk}}}{M_{\text{Mammary gland}} K_{\text{Mammary gland}/\text{Milk}}} \quad (\text{A6d})$$

$$C_{\text{Milk}} = \frac{C_{\text{Mammary gland}}}{K_{\text{Mammary gland}/\text{Milk}}} \quad (\text{A6e})$$

where  $c_{\text{Mammary gland}}$  ( $\text{mg kg}^{-1}$ ) and  $c_{\text{Milk}}$  ( $\text{mg kg}^{-1}$ ) are the pesticide concentrations in the mammary gland and milk, respectively;  $m_{\text{Mammary gland}}$  ( $\text{mg}$ ) is the pesticide mass in the mammary gland;  $Q_{\text{Blood} \leftrightarrow \text{Mammary gland}}$  ( $\text{kg day}^{-1}$ ) is the blood flow of mammary gland;  $k_{\text{Blood} \rightarrow \text{Mammary gland}}^+$  ( $\text{day}^{-1}$ ),  $k_{\text{Mammary gland} \rightarrow \text{Blood}}^-$  ( $\text{day}^{-1}$ ), and  $k_{e, \text{Milk}}$  ( $\text{day}^{-1}$ ) are the blood-to-mammary gland uptake rate constant and mammary gland-to-blood elimination rate constant, and elimination rate constant via milk excretion, respectively;  $M_{\text{Mammary gland}}$  ( $\text{kg}$ ) is the mass of the mammary gland;  $K_{\text{Mammary gland}/\text{Blood}}$  and  $K_{\text{Mammary gland}/\text{Milk}}$  are the mammary gland-to-blood and mammary gland-to-milk partition coefficients, respectively.

In the blood compartment in the steady state:

$$\frac{dm_{\text{Blood}}}{dt} = \sum (k_{\text{Tissue } i \rightarrow \text{Blood}}^+ m_{\text{Tissue } i}) - \sum (k_{\text{Blood} \rightarrow \text{Tissue } i}^- m_{\text{Blood}}) = 0 \quad (\text{A7a})$$

$$k_{\text{Tissue } i \rightarrow \text{Blood}}^+ = \frac{Q_{\text{Blood} \leftrightarrow \text{Tissue } i}}{M_{\text{Tissue } i} K_{\text{Tissue } i/\text{Blood}}} \quad (\text{A7b})$$

$$k_{\text{Blood} \rightarrow \text{Tissue } i}^- = \frac{Q_{\text{Blood} \leftrightarrow \text{Tissue } i}}{M_{\text{Blood}}} \quad (\text{A7c})$$

where  $k_{\text{Tissue } i \rightarrow \text{Blood}}^+$  ( $\text{day}^{-1}$ ) is the tissue  $i$ -to-blood uptake rate constant;  $Q_{\text{Blood} \leftrightarrow \text{Tissue } i}$  ( $\text{kg day}^{-1}$ ) is the blood flow of tissue  $i$ ;  $k_{\text{Blood} \rightarrow \text{Tissue } i}^-$  ( $\text{day}^{-1}$ ) is the blood-to-tissue  $i$  elimination rate constant; and  $M_{\text{Tissue } i}$  ( $\text{kg}$ ) is the mass of tissue  $i$ .

## S2. Estimation of $E_{\text{uptake}}$ values

In the present study, we approximated the  $E_{\text{uptake}}$  values of pesticides using the octanol–water partition coefficient ( $K_{\text{OW}}$ ) (O’Connor et al., 2013). (O’Connor et al., 2013) and (Hendriks et al., 2001) have proposed a simple model for estimating the uptake efficiency of pesticides via oral

ingestion based on a series of resistance rates and fractions of water and lipids in food, which can be expressed as follows:

$$E_{\text{uptake}} \approx \left( \frac{1}{\eta_W + \frac{\eta_M}{K_{\text{OW}}} + \frac{1}{\zeta \left( (1 - f_{\text{Lip}}^A) f_{\text{Lip}} K_{\text{OW}} + (1 - f_W^A)(1 - f_{\text{Lip}}) \right)}} \right) \left( \frac{1}{(1 - f_{\text{Lip}}^A) f_{\text{Lip}} K_{\text{OW}} + (1 - f_W^A)(1 - f_{\text{Lip}})} \right)^{\frac{1}{\zeta}} \quad (\text{A8a})$$

$$E_{\text{uptake}} \approx \frac{1}{0.05 \left( 0.000037 + \frac{0.12}{K_{\text{OW}}} \right) (0.006 K_{\text{OW}} + 0.485) + 1} \quad (\text{A8b})$$

where  $\eta_W$  ( $3.7 \times 10^{-5} \text{ day kg}^{-0.25}$ ) and  $\eta_M$  ( $0.12 \text{ day kg}^{-0.25}$ ) are the water layer and out membrane layer, respectively (O'Connor et al., 2013);  $\zeta$  (0.05) is the food ingestion coefficient (Hendriks et al., 2001);  $f_W^A$  (0.5) (Schroeder, 1981; Steffens, 1996) and  $f_{\text{Lip}}^A$  (0.8) (Calder and Braun, 1983; Edwards, 1975) are water and lipid assimilation efficiencies, respectively;  $f_{\text{Lip}}$  (0.03, generic) is the lipid fraction (O'Connor et al., 2013). Figure A1 shows the simulated  $E_{\text{Uptake}}$  values of 736 pesticides that are plotted against  $K_{\text{OW}}$  values.

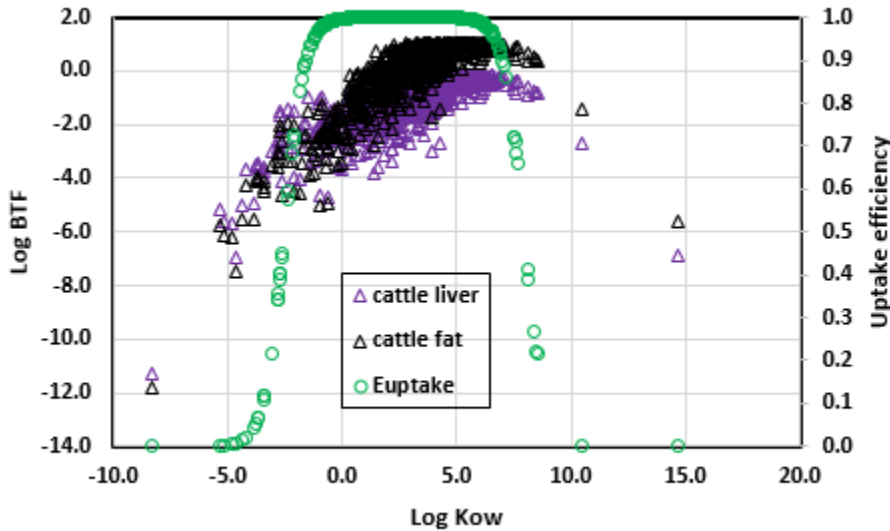

Figure A1. Simulated logarithms of the biotransfer factors (log BTF) and uptake efficiencies of 736 pesticides in cattle liver and fat plotted against log  $K_{\text{OW}}$  values.

### S3. Estimation of $k_{m,Liver}$ values

In the present study, we approximated the pesticide  $k_{m,Liver}$  values in the mammalian livers using the biotransformation rate constants in fish, for which an empirical multiplication factor of 5.0 was applied, assuming that the metabolic rates of pesticides in the mammalian livers are 5 times higher than those in fish (Arnot et al., 2009; Ciffroy and Radomyski, 2021). The biotransformation rate constants in fish were converted from biotransformation half-lives obtained from EPI Suite (BCFBAF V3.01, United States) (Arnot et al., 2009; Papa et al., 2014; USEPA, 2012). As EPI Suite provides half-lives at a temperature of 15°C, we adjusted the metabolic rates at the mammalian body temperature of 38.5°C (Aswini et al., 2017; Piccione et al., 2002) using a multiplication factor of  $e^{0.01(38.5-15)}$  (Arnot et al., 2009). The data are provided in the supporting database.

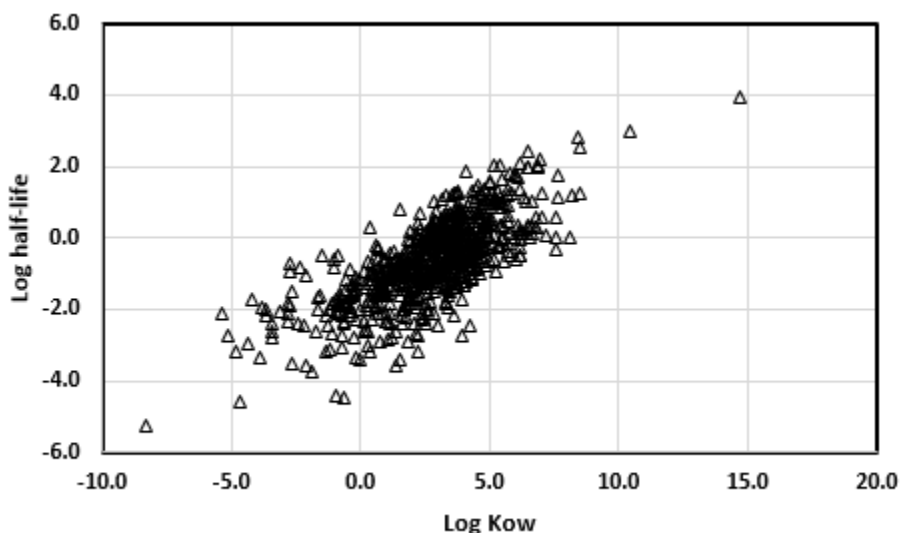

Figure A2. Logarithms of the half-lives of 736 pesticides (biotransformation in fish) (data obtained from EPI Suite) plotted against log  $K_{ow}$  values.



#### S4. Estimation of partition coefficients

In this study, we adopted the content-based method (i.e., three-phase partitioning approach) (Kelly and Gobas, 2003; Li, 2020) for estimating partition coefficients of pesticides as follows:

$$K_{i/i+1} = \frac{\theta_{Oct,i} + 0.035\theta_{NLO,i} + \frac{\theta_{Water,i}}{K_{OW}} \times \frac{\rho_{Octanol}}{\rho_{Water}}}{\theta_{Oct,i+1} + 0.035\theta_{NLO,i+1} + \frac{\theta_{Water,i+1}}{K_{OW}} \times \frac{\rho_{Octanol}}{\rho_{Water}}} \quad (A9a)$$

$$K_{Lung/Air} = \frac{K_{Lung/Water}}{\frac{K_{Air/Water}}{\rho_{Air}}} \quad (A9b)$$

where  $\theta_{Oct,i}$  ( $g\ g^{-1}$ ),  $\theta_{NLO,i}$  ( $g\ g^{-1}$ ), and  $\theta_{Water,i}$  ( $g\ g^{-1}$ ) are the lipid, non-lipid organics, and water contents of compartment  $i$  (or elimination medium  $i$ ) of livestock animals, respectively; subscription  $i + 1$  denotes compartment  $i + 1$ ;  $\rho_{Octanol}$  ( $kg\ L^{-1}$ ) and  $\rho_{Water}$  ( $kg\ L^{-1}$ ) are densities of octanol ( $0.824\ kg\ L^{-1}$ ) and water ( $1.0\ kg\ L^{-1}$ ), respectively, which are applied to convert the unit of  $K_{i/i+1}$  to  $kg\ kg^{-1}$  (or unitless).  $K_{Lung/Air}$ ,  $K_{Lung/Water}$ , and  $K_{Air/Water}$  are the lung-air, lung-water, and air-water partition coefficients, respectively;  $\rho_{Air}$  ( $kg\ L^{-1}$ ) is the density of the air ( $0.0012\ kg\ L^{-1}$ ), which is applied to convert the unit of  $K_{Lung/Air}$  to  $kg\ kg^{-1}$  (or unitless). Nutrition compositions of animal raw products (or excretion media) for common livestock animals (i.e., cattle and sheep) are provided in Tables S1 and S2.

Table A1. Nutrition compositions of raw products and elimination media for cattle.

| Media/Products | Contents (g g <sup>-1</sup> ) |                    |       |        | References                           | Notes                                                                                                                               |
|----------------|-------------------------------|--------------------|-------|--------|--------------------------------------|-------------------------------------------------------------------------------------------------------------------------------------|
|                | Lipid (fat)                   | Non-lipid organics | Water | Others |                                      |                                                                                                                                     |
| Blood          | 0.0023                        | 0.1737             | 0.809 | 0.015  | (Alencar, 1983; Duarte et al., 1999) |                                                                                                                                     |
| Urine          | 0                             | 0                  | 0.95  | 0.05   | (Gulhane et al., 2017)               | Lipid and non-lipid organics are negligible.                                                                                        |
| Bile           | 0.0056                        | 0.0004             | 0.894 | 0.1    | (Hertrampf and Piedad-Pascual, 2000) | Lipid content is the sum of lecithin and cholesterol                                                                                |
| Milk           | 0.037                         | 0.084              | 0.872 | 0.007  | (Guetouache et al., 2014)            | Non-lipid organics include proteins and lactose.                                                                                    |
| Liver          | 0.036                         | 0.243              | 0.708 | 0.013  | (NutritionData, 2018)                |                                                                                                                                     |
| Kidney         | 0.031                         | 0.177              | 0.779 | 0.013  | (NutritionData, 2018)                |                                                                                                                                     |
| Muscle         | 0.028                         | 0.232              | 0.731 | 0.009  | (Williams, 2007)                     | Estimated by lean tissues.                                                                                                          |
| Fat            | 0.8                           | 0                  | 0.2   | 0      | (Murphy, 1992)                       | Generic (adipose tissue).                                                                                                           |
| Lung           | 0.025                         | 0.162              | 0.794 | 0.0098 | (USDA, 2021)                         |                                                                                                                                     |
| Mammary gland  | 0.15                          | 0.13               | 0.72  | 0      | (Calorie-charts, 2018)               | No information was found about nutrition composition of mammary gland; we applied the data of beef udder based on a cached webpage. |

Table A2. Nutrition compositions of raw products and elimination media for sheep.

| Media/Products | Contents (g g <sup>-1</sup> ) |                    |       |        | References            | Notes                                                   |
|----------------|-------------------------------|--------------------|-------|--------|-----------------------|---------------------------------------------------------|
|                | Lipid (fat)                   | Non-lipid organics | Water | Others |                       |                                                         |
| Blood          | 0.005                         | 0.165              | 0.82  | 0.01   |                       | Estimated.                                              |
| Urine          | 0                             | 0                  | 0.95  | 0.05   |                       | Estimated; lipid and non-lipid organics are negligible. |
| Bile           | 0.0056                        | 0.0004             | 0.894 | 0.1    |                       | Applying cattle's data.                                 |
| Milk           | 0.07                          | 0.114              | 0.807 | 0.009  | (NutritionData, 2018) | Non-lipid organics include proteins and lactose.        |
| Liver          | 0.05                          | 0.222              | 0.714 | 0.014  | (NutritionData, 2018) |                                                         |
| Kidney         | 0.03                          | 0.165              | 0.792 | 0.013  | (NutritionData, 2018) |                                                         |
| Muscle         | 0.047                         | 0.215              | 0.732 | 0.006  | (Williams, 2007)      | Estimated by lean tissues.                              |
| Fat            | 0.8                           | 0                  | 0.2   | 0      | (Murphy, 1992)        | Generic (adipose tissue).                               |
| Lung           | 0.026                         | 0.167              | 0.797 | 0.011  | (USDA, 2021)          |                                                         |
| Mammary gland  | 0.15                          | 0.13               | 0.72  | 0      |                       | Estimated by beef udder.                                |

## **S5. Physiological variables**

Physiological variables for common livestock animals (cattle and sheep) are provided in Tables A3 and A4. Generic values of 1.0, 1.1, and 0.9 kg L<sup>-1</sup> were applied as the densities of mammal organs (Ciffroy and Radomyski, 2021), muscle, and fat, respectively. A generic value of 1.0 kg L<sup>-1</sup> was applied as the density of mammal blood, urine, hepatic bile, and milk (Al-Atabi et al., 2012; Vitello et al., 2015).

Table A3. Summary of the model input variables for cattle.

| Variables                        | Symbol                                                  | Unit                 | Value | Note                                                                                                                                                                                                                        |
|----------------------------------|---------------------------------------------------------|----------------------|-------|-----------------------------------------------------------------------------------------------------------------------------------------------------------------------------------------------------------------------------|
| Food intake rate                 | $IR_{\text{Food}}$                                      | kg day <sup>-1</sup> | 20    | Estimated (dry mass) based on 3% of the body mass (600 kg)                                                                                                                                                                  |
| Exhalation rate                  | $ER_{\text{Exhalation}}$                                | kg day <sup>-1</sup> | 260   | Estimated from the tidal volume and the breath per minute of cattle with the air density of 0.0012 kg L <sup>-1</sup> (Stevens, 1981).                                                                                      |
| Urine excretion rate             | $ER_{\text{Urine}}$                                     | kg day <sup>-1</sup> | 20    | Estimated from the urine volume per body weight per day (Ashara and Shah, 2016).                                                                                                                                            |
| Bile excretion rate              | $ER_{\text{Bile}}$                                      | kg day <sup>-1</sup> | 6.5   | (Symonds et al., 1982) and (Sutton, 1985) estimated the combined bile and pancreatic secretion rate of 13 L day <sup>-1</sup> . It was assumed that the bile secretion rate is half of the pancreatic juice secretion rate. |
| Milk excretion rate              | $ER_{\text{Milk}}$                                      | kg day <sup>-1</sup> | 32.6  | Estimated (Løvendahl and Sehested, 2016)                                                                                                                                                                                    |
| Body mass                        | ---                                                     | kg                   | 600   | Generic                                                                                                                                                                                                                     |
| Blood mass                       | $M_{\text{Blood}}$                                      | kg                   | 22.8  | Estimated (3.8% of the body mass) (Lautz et al., 2020)                                                                                                                                                                      |
| Liver mass                       | $M_{\text{Liver}}$                                      | kg                   | 7.8   | Estimated (1.3% of the body mass) (Lautz et al., 2020)                                                                                                                                                                      |
| Kidney mass                      | $M_{\text{Kidney}}$                                     | kg                   | 1.2   | Estimated (0.2% of the body mass) (Lautz et al., 2020)                                                                                                                                                                      |
| Lung mass                        | $M_{\text{Lung}}$                                       | kg                   | 4.8   | Estimated (0.8% of the body mass) (Lautz et al., 2020)                                                                                                                                                                      |
| Fat mass                         | $M_{\text{Fat}}$                                        | kg                   | 110.4 | Estimated (adipose tissue) (18.4% of the body mass) (Lautz et al., 2020)                                                                                                                                                    |
| Muscle mass                      | $M_{\text{Muscle}}$                                     | kg                   | 240   | Estimated (40% of the body mass; averaged from dairy and beef cattle) (Lautz et al., 2020)                                                                                                                                  |
| Mammary gland mass               | $M_{\text{Mammary gland}}$                              | kg                   | 13.2  | Estimated (2.2% of the body mass) (Lautz et al., 2020)                                                                                                                                                                      |
| Blood flow rate of liver         | $Q_{\text{Blood} \Leftrightarrow \text{Liver}}$         | kg day <sup>-1</sup> | 56739 | Estimated from dairy cattle (sum of hepatic artery and portal vein flows) (Lautz et al., 2020)                                                                                                                              |
| Blood flow rate of kidney        | $Q_{\text{Blood} \Leftrightarrow \text{Kidney}}$        | kg day <sup>-1</sup> | 1375  | Estimated from dairy cattle (Lautz et al., 2020)                                                                                                                                                                            |
| Blood flow rate of lung          | $Q_{\text{Blood} \Leftrightarrow \text{Lung}}$          | kg day <sup>-1</sup> | 2579  | Estimated from sheep (Lautz et al., 2020)                                                                                                                                                                                   |
| Blood flow rate of fat           | $Q_{\text{Blood} \Leftrightarrow \text{Fat}}$           | kg day <sup>-1</sup> | 5846  | Estimated from dairy cattle (Lautz et al., 2020)                                                                                                                                                                            |
| Blood flow rate of muscle        | $Q_{\text{Blood} \Leftrightarrow \text{Muscle}}$        | kg day <sup>-1</sup> | 1633  | Estimated from dairy cattle (Lautz et al., 2020)                                                                                                                                                                            |
| Blood flow rate of mammary gland | $Q_{\text{Blood} \Leftrightarrow \text{Mammary gland}}$ | kg day <sup>-1</sup> | 14185 | Estimated from dairy cattle (Lautz et al., 2020)                                                                                                                                                                            |

Table A4. Summary of the model input variables for sheep.

| Variables                        | Symbol                                                  | Unit                 | Value | Note                                                                                                                                                          |
|----------------------------------|---------------------------------------------------------|----------------------|-------|---------------------------------------------------------------------------------------------------------------------------------------------------------------|
| Food intake rate                 | $IR_{\text{Food}}$                                      | $\text{kg day}^{-1}$ | 2.1   | Estimated (dry mass) based on 3% of the body mass (70 kg)                                                                                                     |
| Exhalation rate                  | $ER_{\text{Exhalation}}$                                | $\text{kg day}^{-1}$ | 25    | Estimated from the tidal volume and the breath per minute of sheep (30 bpm) with the air density of $0.0012 \text{ kg L}^{-1}$ (Gomes da Silva et al., 2002). |
| Urine excretion rate             | $ER_{\text{Urine}}$                                     | $\text{kg day}^{-1}$ | 3.0   | Estimated (Marsden et al., 2020).                                                                                                                             |
| Bile excretion rate              | $ER_{\text{Bile}}$                                      | $\text{kg day}^{-1}$ | 0.5   | Estimated (Brown, 1967).                                                                                                                                      |
| Milk excretion rate              | $ER_{\text{Milk}}$                                      | $\text{kg day}^{-1}$ | 1.5   | The milk excretion rate was estimated from Manchega and Lacaune dairy ewes (Castillo et al., 2009).                                                           |
| Body mass                        | ---                                                     | kg                   | 70    | Generic                                                                                                                                                       |
| Blood mass                       | $M_{\text{Blood}}$                                      | kg                   | 3.3   | Estimated (4.7% of the body mass) (Lautz et al., 2020)                                                                                                        |
| Liver mass                       | $M_{\text{Liver}}$                                      | kg                   | 1.0   | Estimated (1.5% of the body mass) (Lautz et al., 2020)                                                                                                        |
| Kidney mass                      | $M_{\text{Kidney}}$                                     | kg                   | 0.2   | Estimated (0.3% of the body mass) (Lautz et al., 2020)                                                                                                        |
| Lung mass                        | $M_{\text{Lung}}$                                       | kg                   | 0.8   | Estimated (1.1% of the body mass) (Lautz et al., 2020)                                                                                                        |
| Fat mass                         | $M_{\text{Fat}}$                                        | kg                   | 13.4  | Estimated (adipose tissue) (19.2% of the body mass) (Lautz et al., 2020)                                                                                      |
| Muscle mass                      | $M_{\text{Muscle}}$                                     | kg                   | 24.7  | Estimated (35.3% of the body mass) (Lautz et al., 2020)                                                                                                       |
| Mammary gland mass               | $M_{\text{Mammary gland}}$                              | kg                   | 1.2   | Estimated (1.7% of the body mass) (Lautz et al., 2020)                                                                                                        |
| Blood flow rate of liver         | $Q_{\text{Blood} \Leftrightarrow \text{Liver}}$         | $\text{kg day}^{-1}$ | 3788  | Estimated (sum of hepatic artery and portal vein flows) (Lautz et al., 2020)                                                                                  |
| Blood flow rate of kidney        | $Q_{\text{Blood} \Leftrightarrow \text{Kidney}}$        | $\text{kg day}^{-1}$ | 1318  | Estimated (Lautz et al., 2020)                                                                                                                                |
| Blood flow rate of lung          | $Q_{\text{Blood} \Leftrightarrow \text{Lung}}$          | $\text{kg day}^{-1}$ | 276   | Estimated (Lautz et al., 2020)                                                                                                                                |
| Blood flow rate of fat           | $Q_{\text{Blood} \Leftrightarrow \text{Fat}}$           | $\text{kg day}^{-1}$ | 212   | Estimated (Lautz et al., 2020)                                                                                                                                |
| Blood flow rate of muscle        | $Q_{\text{Blood} \Leftrightarrow \text{Muscle}}$        | $\text{kg day}^{-1}$ | 3060  | Estimated (Lautz et al., 2020)                                                                                                                                |
| Blood flow rate of mammary gland | $Q_{\text{Blood} \Leftrightarrow \text{Mammary gland}}$ | $\text{kg day}^{-1}$ | 682   | Estimated (Lautz et al., 2020)                                                                                                                                |

## S6. Derivation of BTF values

According to Eq. (7), the  $BTF_i$  is equal to the  $C_i$  value (i.e.,  $\frac{m_i}{M_i}$ ) by setting the  $C_{Food}$  value as 1.0 mg  $kg^{-1}$ . Then, the analytical solutions of  $BTF_i$  values of the pesticide using the value of 1.0 mg  $kg^{-1}$  for  $C_{Food}$  can be expressed as follows:

$$BTF_{Blood} = \frac{1}{M_{Blood}} \left( \frac{k_{Liver \rightarrow Blood}^+ E_{uptake} IR_{Food}}{k_{Liver \rightarrow Blood}^- + k_{m,Liver} + k_{e,Blie}} \right) \left[ \sum k_{Blood \rightarrow Tissue\ i}^- \right. \quad (A10a)$$

$$- \left( \frac{k_{Liver \rightarrow Blood}^+ k_{Blood \rightarrow Liver}^+}{k_{Liver \rightarrow Blood}^- + k_{m,Liver} + k_{e,Blie}} + \frac{k_{Kidney \rightarrow Blood}^+ k_{Blood \rightarrow Kidney}^+}{k_{Kidney \rightarrow Blood}^- + k_{e,Urine}} \right.$$

$$+ \frac{k_{Lung \rightarrow Blood}^+ k_{Blood \rightarrow Lung}^+}{k_{Lung \rightarrow Blood}^- + k_{e,Exhalation}} + \frac{k_{Mammary\ gland \rightarrow Blood}^+ k_{Blood \rightarrow Mammary\ gland}^+}{k_{Mammary\ gland \rightarrow Blood}^- + k_{e,Milk}}$$

$$\left. + \frac{k_{Fat \rightarrow Blood}^+ k_{Blood \rightarrow Fat}^+}{k_{Fat \rightarrow Blood}^-} + \frac{k_{Muscle \rightarrow Blood}^+ k_{Blood \rightarrow Muscle}^+}{k_{Muscle \rightarrow Blood}^-} \right) \Bigg]^{-1}$$

$$BTF_{Liver} = \frac{1}{M_{Liver}} \left( \frac{E_{uptake} IR_{Food} + k_{Blood \rightarrow Liver}^+ BTF_{Blood} M_{Blood}}{k_{Liver \rightarrow Blood}^- + k_{m,Liver} + k_{e,Blie}} \right) \quad (A10b)$$

$$BTF_{Kidney} = \frac{1}{M_{Kidney}} \left( \frac{k_{Blood \rightarrow Kidney}^+ BTF_{Blood} M_{Blood}}{k_{Kidney \rightarrow Blood}^- + k_{e,Urine}} \right) \quad (A10c)$$

$$BTF_{Lung} = \frac{1}{M_{Lung}} \left( \frac{k_{Blood \rightarrow Lung}^+ BTF_{Blood} M_{Blood}}{k_{Lung \rightarrow Blood}^- + k_{e,Exhalation}} \right) \quad (A10d)$$

$$BTF_{Fat} = \frac{1}{M_{Fat}} \left( \frac{k_{Blood \rightarrow Fat}^+ BTF_{Blood} M_{Blood}}{k_{Fat \rightarrow Blood}^-} \right) \quad (A10e)$$

$$BTF_{Muscle} = \frac{1}{M_{Muscle}} \left( \frac{k_{Blood \rightarrow Muscle}^+ BTF_{Blood} M_{Blood}}{k_{Muscle \rightarrow Blood}^-} \right) \quad (A10f)$$

$$BTF_{Mammary\ gland} = \frac{1}{M_{Mammary\ gland}} \left( \frac{k_{Blood \rightarrow Mammary\ gland}^+ BTF_{Blood} M_{Blood}}{k_{Mammary\ gland \rightarrow Blood}^- + k_{e,Milk}} \right) \quad (A10g)$$

$$BTF_{Milk} = \frac{BTF_{Mammary\ gland}}{K_{Mammary\ gland/Milk}} \quad (A10h)$$

## S7. Uptake-to-elimination ratios

The uptake-to-elimination ratio ( $R_{\bar{B}}^U$ ) of the pesticide in animal tissue  $i$  is defined as the constant rate ratio of the uptake to elimination process in tissue  $i$ . Then, the uptake-to-elimination ratios in selected animal tissues can be expressed as follows:

$$R_{\bar{B}}^U = \begin{cases} \frac{E_{\text{uptake}} I R_{\text{Food}}}{M_{\text{Liver}}}; & \text{from food in gut lumen} \\ \frac{k_{\text{Blood} \rightarrow \text{Liver}}^+}{k_{\text{Liver} \rightarrow \text{Blood}}^- + k_{\text{m,Liver}} + k_{\text{e,Blie}}}; & \text{from blood} \end{cases} \quad (\text{A11a})$$

$$R_{\bar{B}}^U = \frac{k_{\text{Blood} \rightarrow \text{Kidney}}^+}{k_{\text{Kidney} \rightarrow \text{Blood}}^- + k_{\text{e,Urine}}} \quad (\text{A11b})$$

$$R_{\bar{B}}^U = \frac{k_{\text{Blood} \rightarrow \text{Lung}}^+}{k_{\text{Lung} \rightarrow \text{Blood}}^- + k_{\text{e,Exhalation}}} \quad (\text{A11c})$$

$$R_{\bar{B}}^U = \frac{k_{\text{Blood} \rightarrow \text{Fat}}^+}{k_{\text{Fat} \rightarrow \text{Blood}}^-} \quad (\text{A11d})$$

$$R_{\bar{B}}^U = \frac{k_{\text{Blood} \rightarrow \text{Muscle}}^+}{k_{\text{Muscle} \rightarrow \text{Blood}}^-} \quad (\text{A11e})$$

$$R_{\bar{B}}^U = \frac{k_{\text{Blood} \rightarrow \text{Mammary gland}}^+}{k_{\text{Mammary gland} \rightarrow \text{Blood}}^- + k_{\text{e,Milk}}} \quad (\text{A11f})$$

$$R_{\bar{B}}^U = \frac{R_{\bar{B}}^U \text{Mammary gland}}{K_{\text{Mammary gland/Milk}}} \quad (\text{A11g})$$

## S8. Model parameterization (BTF vs log $K_{ow}$ )

The relationship between the simulated log BTF values of 736 pesticides in foods of animal origin and log  $K_{ow}$  values is illustrated in Figure A3.

cattle liver

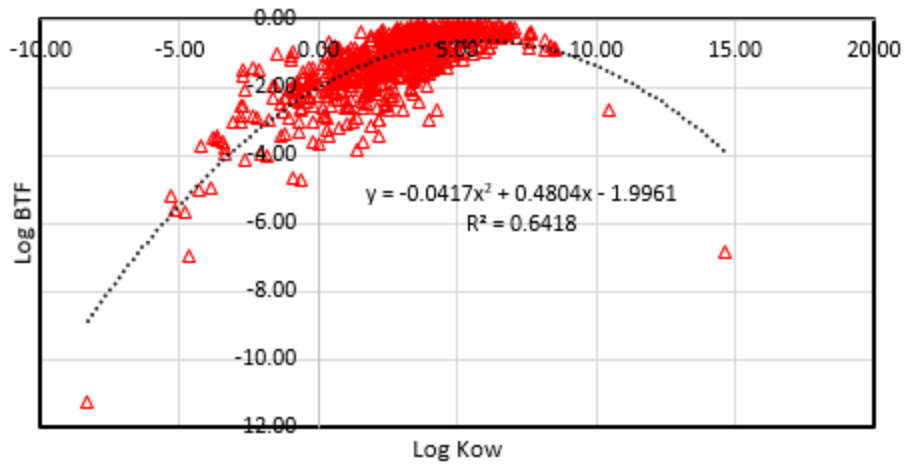

cattle kidney

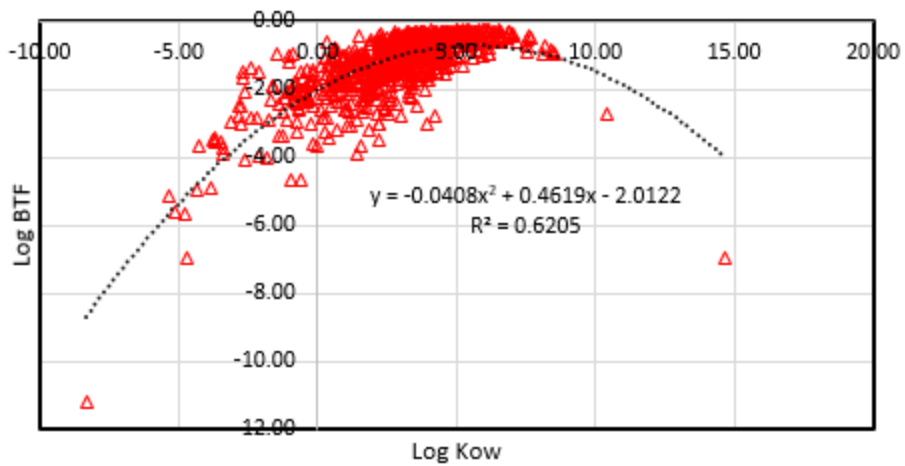

cattle fat

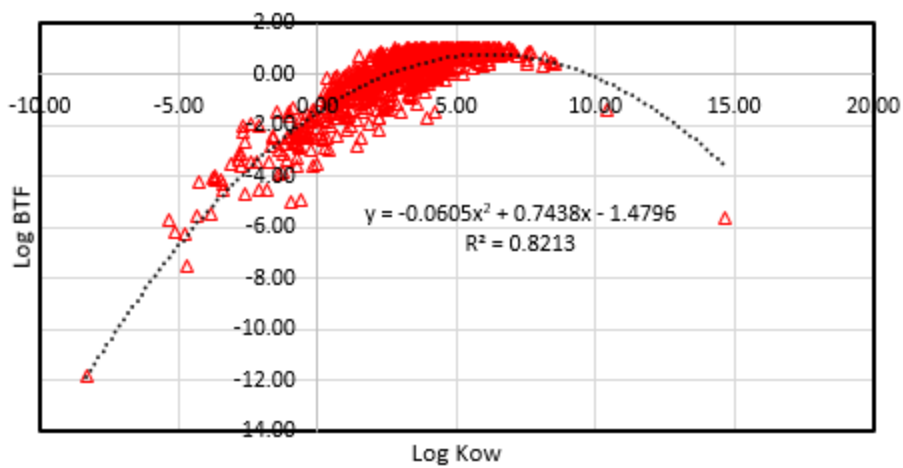



cattle muscle

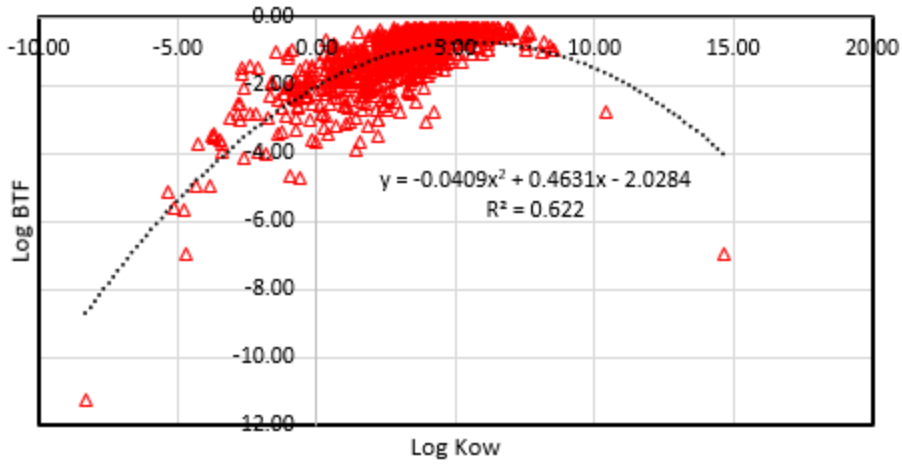

cattle milk

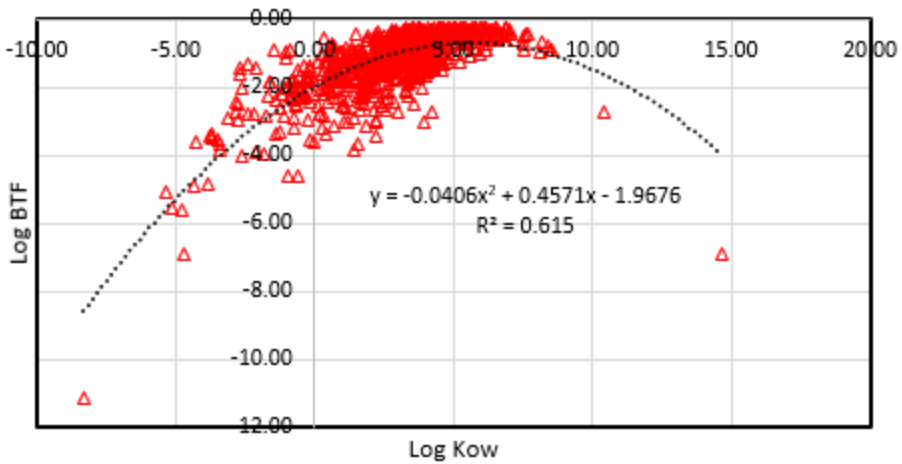

sheep liver

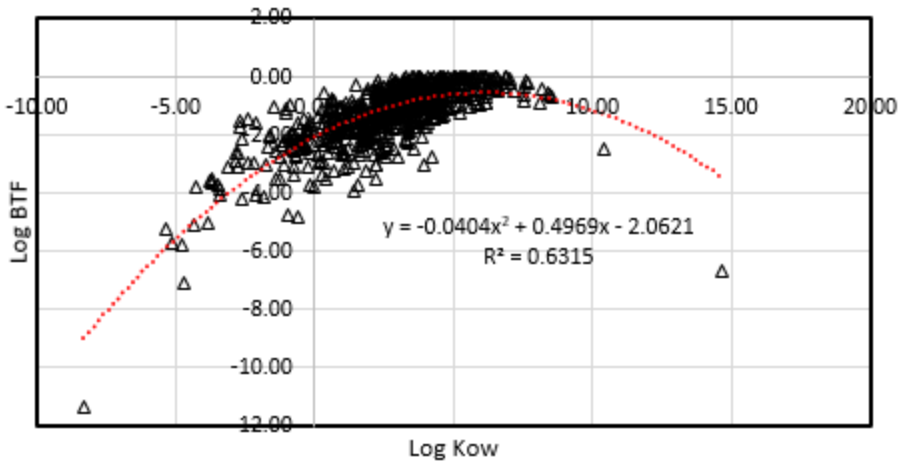

sheep kidney

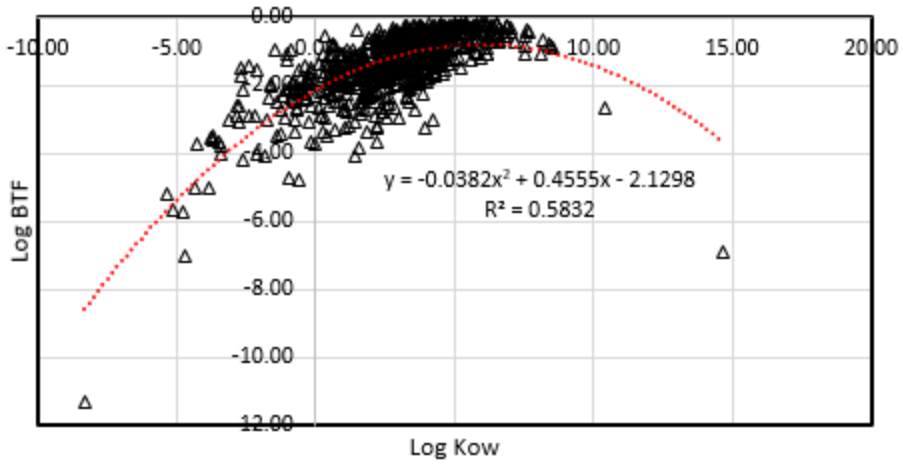

sheep fat

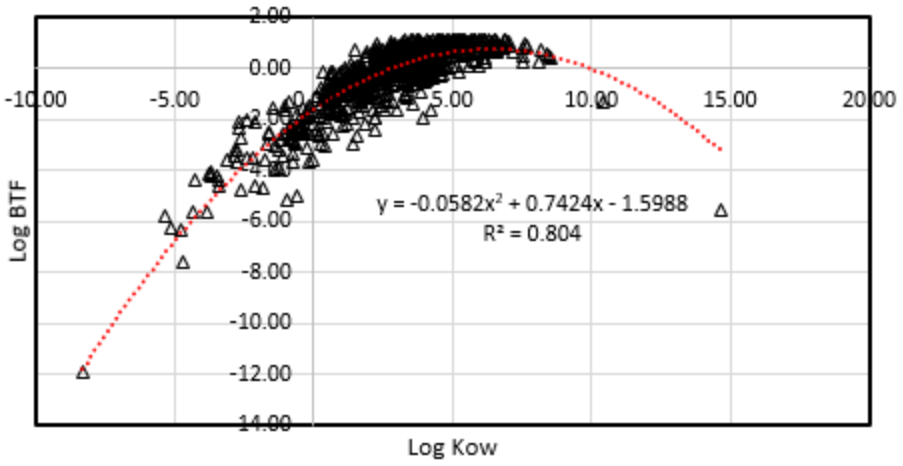

sheep muscle

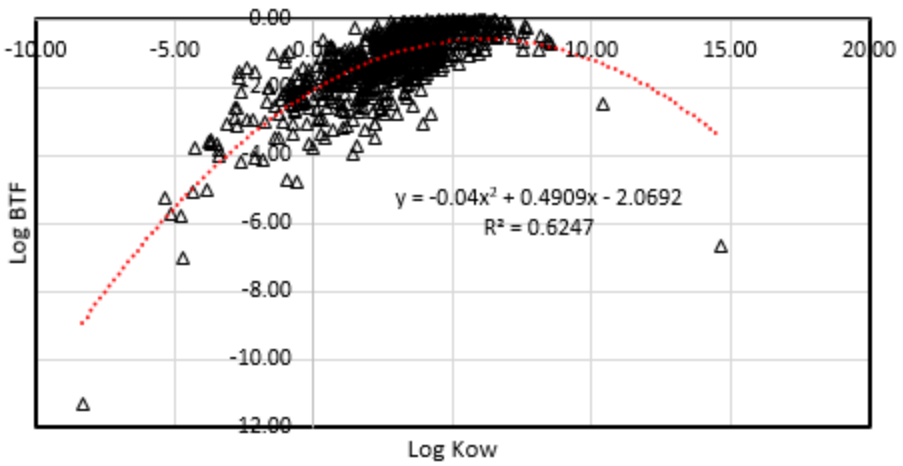

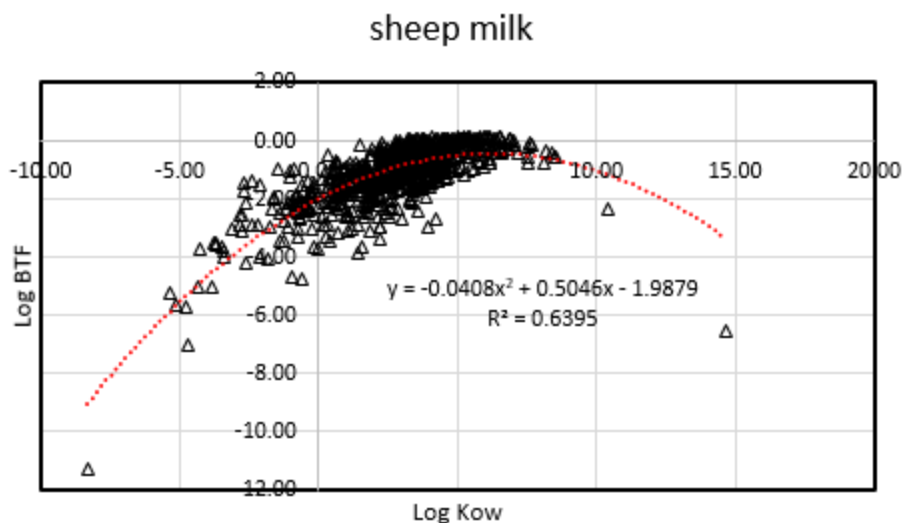

Figure A3. Relationships between the simulated log BTF values of 736 pesticides in foods of animal origin and log  $K_{ow}$  values.

### S9. Linear relationships of BTFs among cattle and sheep products

The linear relationships of BTFs among cattle and sheep products simulated for 736 pesticides are shown in the following figures. The fitted linear equations are given by the following equations.

Using the BTF of the cattle liver ( $BTF_{Liver}^{Cattle}$ ) as the surrogate, pesticide BTFs of the other cattle products can be expressed as follows:

$$BTF_{Kidney}^{Cattle} = 0.83 \times BTF_{Liver}^{Cattle} \quad (A12a)$$

$$BTF_{Fat}^{Cattle} = 18.10 \times BTF_{Liver}^{Cattle} \quad (A12b)$$

$$BTF_{Muscle}^{Cattle} = 0.81 \times BTF_{Liver}^{Cattle} \quad (A12c)$$

$$BTF_{Milk}^{Cattle} = 0.88 \times BTF_{Liver}^{Cattle} \quad (A12d)$$

Using the BTF in sheep liver ( $BTF_{Liver}^{Sheep}$ ) as the surrogate product, pesticide BTFs in sheep products can be expressed as follows:

$$BTF_{Kidney}^{Sheep} = 0.62 \times BTF_{Liver}^{Sheep} \quad (A13a)$$

$$BTF_{Fat}^{Sheep} = 13.88 \times BTF_{Liver}^{Sheep} \quad (A13b)$$

$$BTF_{Muscle}^{Sheep} = 0.94 \times BTF_{Liver}^{Sheep} \quad (A13c)$$

$$BTF_{Milk}^{Sheep} = 1.26 \times BTF_{Liver}^{Sheep} \quad (A13d)$$

The fitted linear relationship between  $BTF_{Liver}^{Cattle}$  and  $BTF_{Liver}^{Sheep}$  can be expressed as follows:

$$BTF_{Liver}^{Sheep} = 1.42 \times BTF_{Liver}^{Cattle} \quad (A14)$$

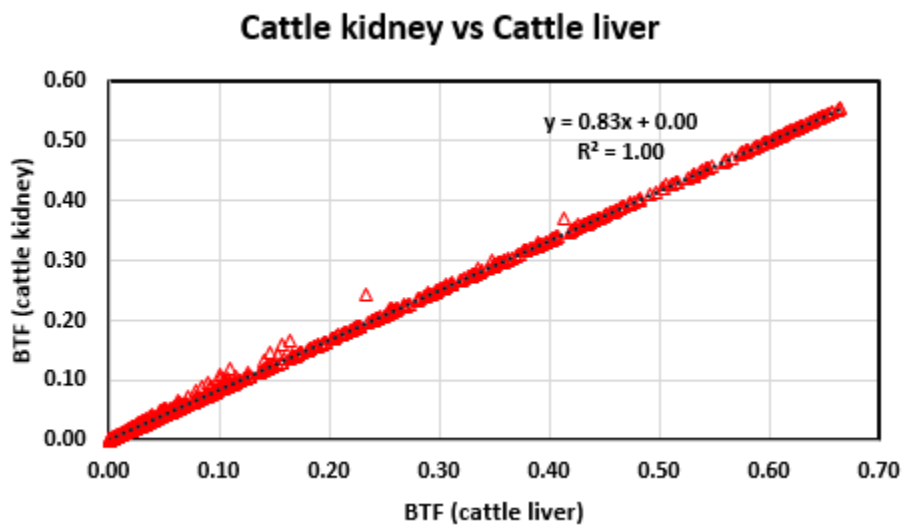

**Cattle fat vs Cattle liver**

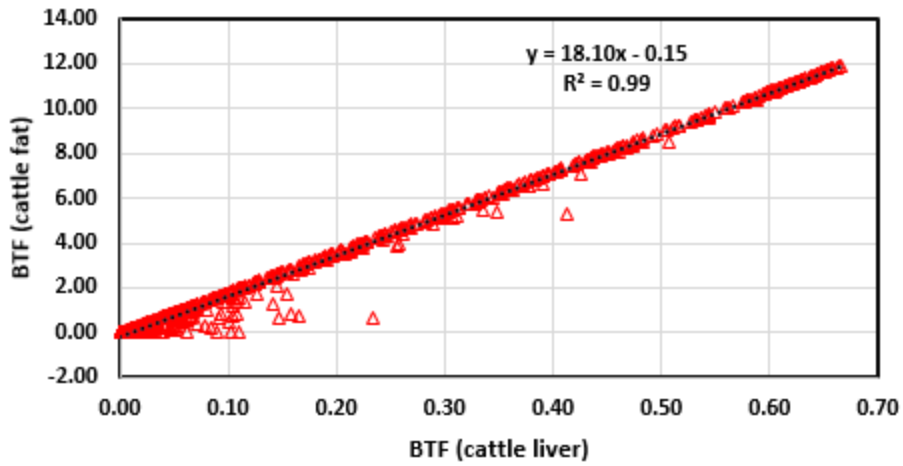

**Cattle muscle vs Cattle liver**

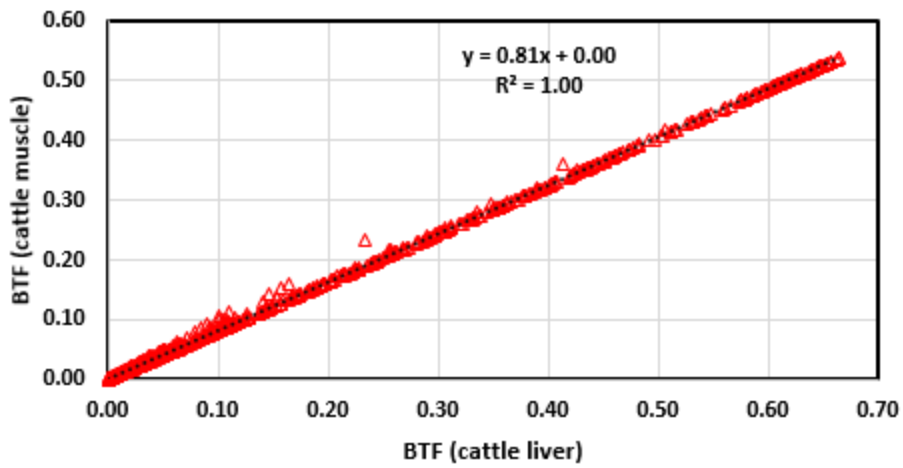

**Cattle milk vs Cattle liver**

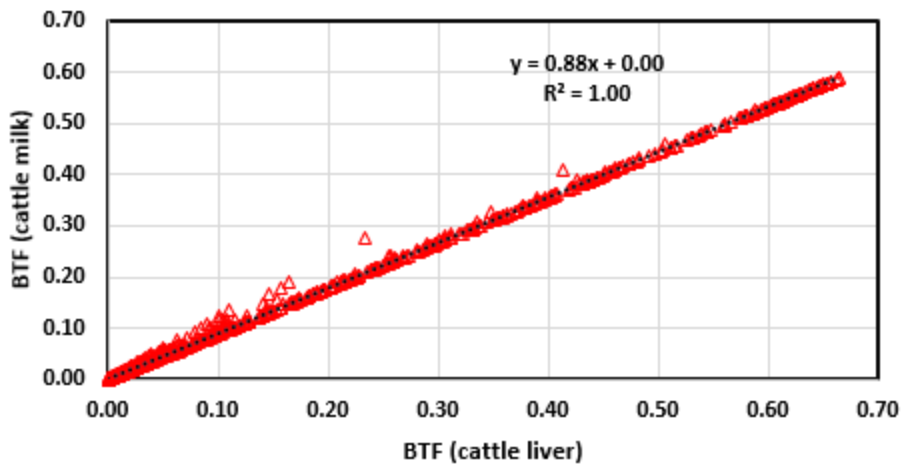

### Sheep kidney vs Sheep liver

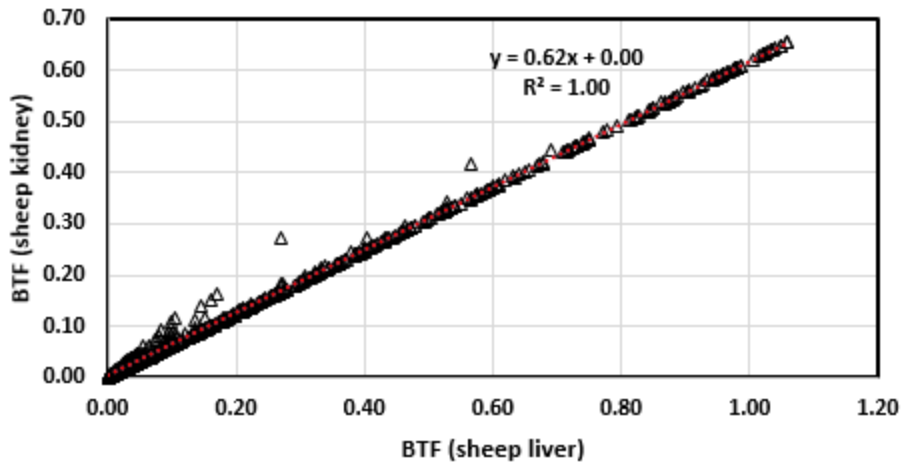

### Sheep fat vs Sheep liver

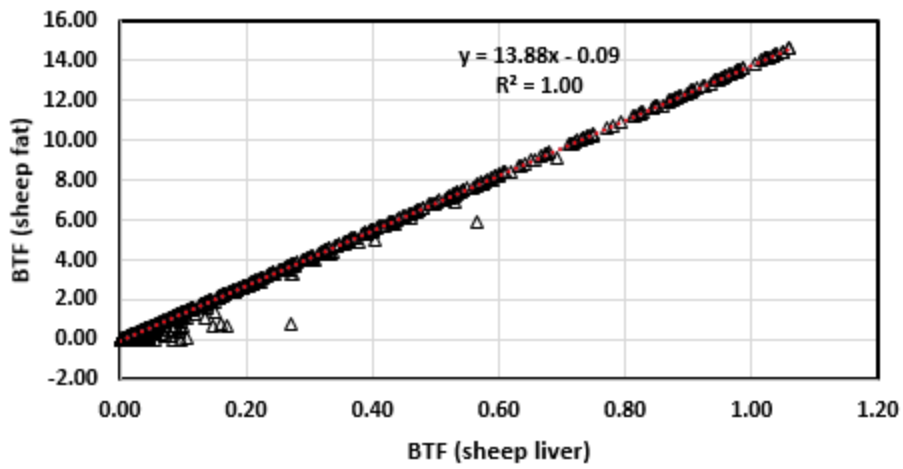

### Sheep muscle vs Sheep liver

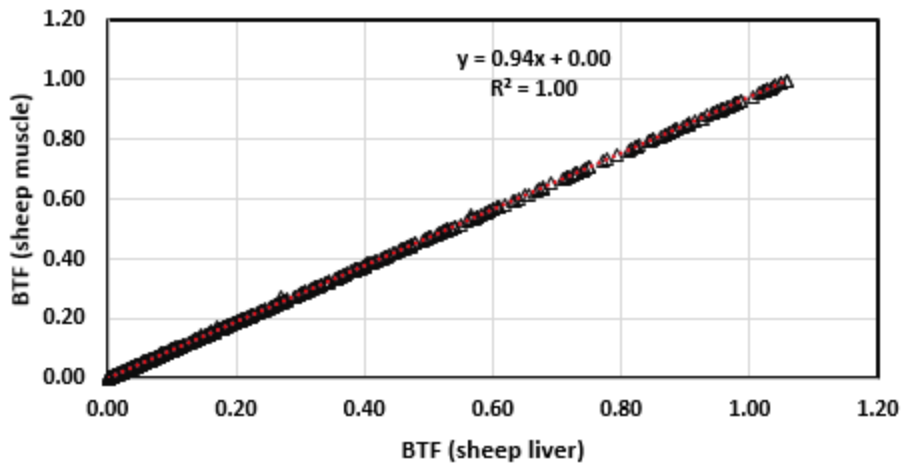

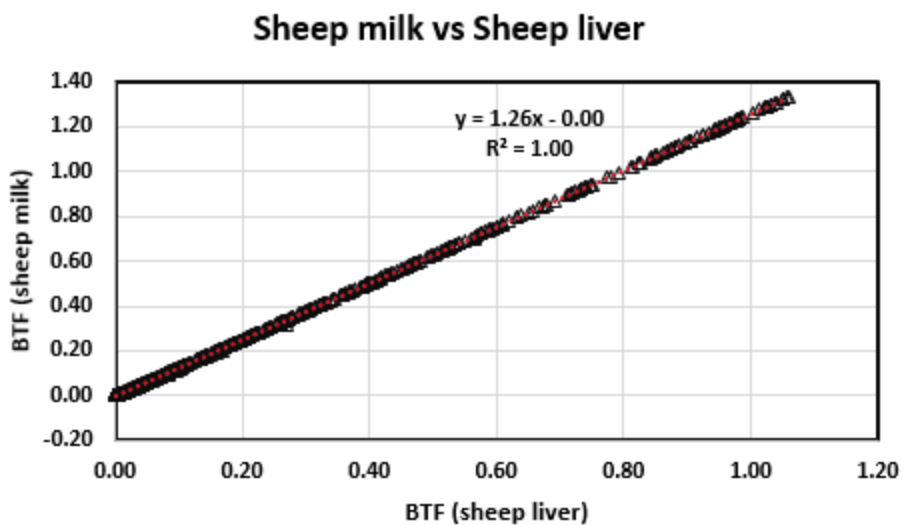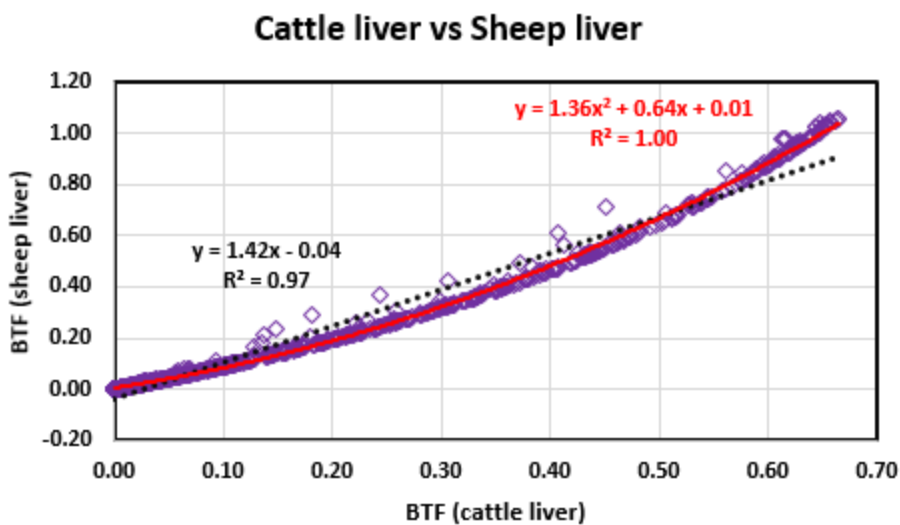

Figure A4. Fitted linear relationships of simulated BTFs of 736 pesticides in cattle and sheep products (liver, kidney, fat, muscle, and milk).

### S10. Model evaluation

Table A5. Means of  $\log BTF^A$  values of organic compounds in cattle meat, muscle, and milk for each  $\log Kow$  intervals.

| Log Kow | Average log BTF <sup>A</sup> |              |                    |                |                    |              |
|---------|------------------------------|--------------|--------------------|----------------|--------------------|--------------|
|         | Measurement (meat)           | Model (meat) | Measurement (meat) | Model (muscle) | Measurement (milk) | Model (milk) |
| < 3     | -4.95                        | -1.93        | -4.95              | -2.72          | -5.62              | -2.67        |
| 3-4     | -2.81                        | -1.34        | -2.81              | -2.21          | -3.29              | -2.17        |
| 4-5     | -3.25                        | -1.18        | -3.25              | -2.05          | -3.03              | -2.01        |
| 5-6     | -1.46                        | -0.94        | -1.46              | -1.81          | -2.47              | -1.77        |
| 6-7     | -1.55                        | -0.89        | -1.55              | -1.76          | -2.35              | -1.72        |
| 7-8     | -1.53                        | -1.00        | -1.53              | -1.86          | -2.10              | -1.82        |
| ≥ 8     | -1.85                        | -1.31        | -1.85              | -2.18          | -2.38              | -2.14        |

Note: mean absolute errors between the measurement and simulation for meat, muscle, and milk are 0.96, 0.50, and 0.67, respectively.

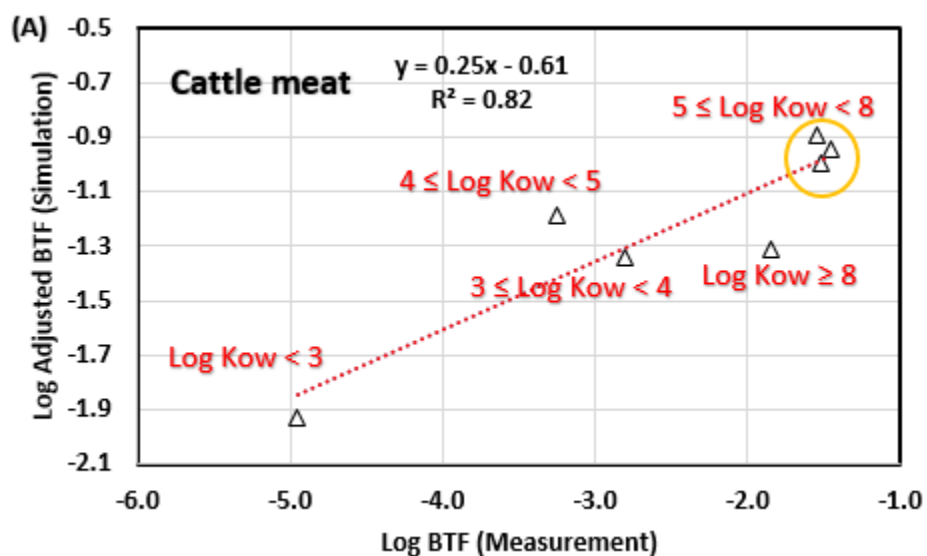



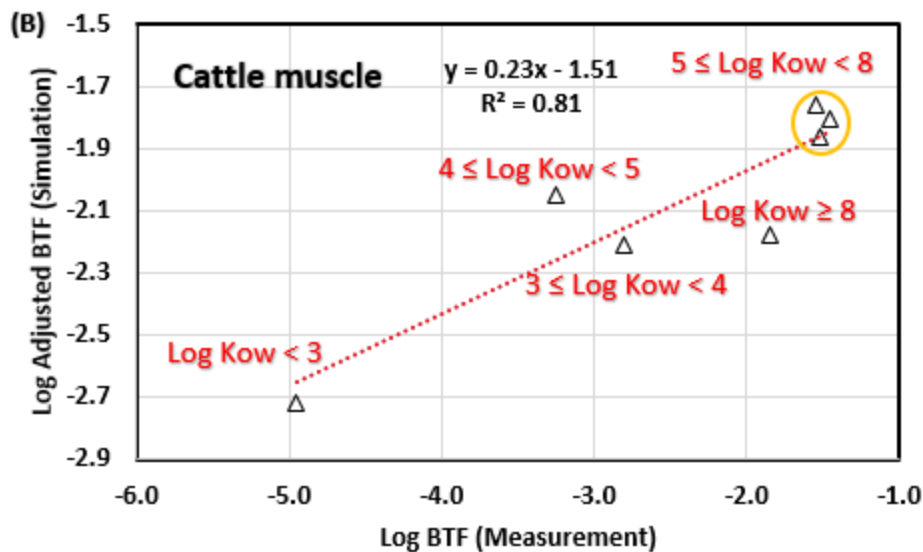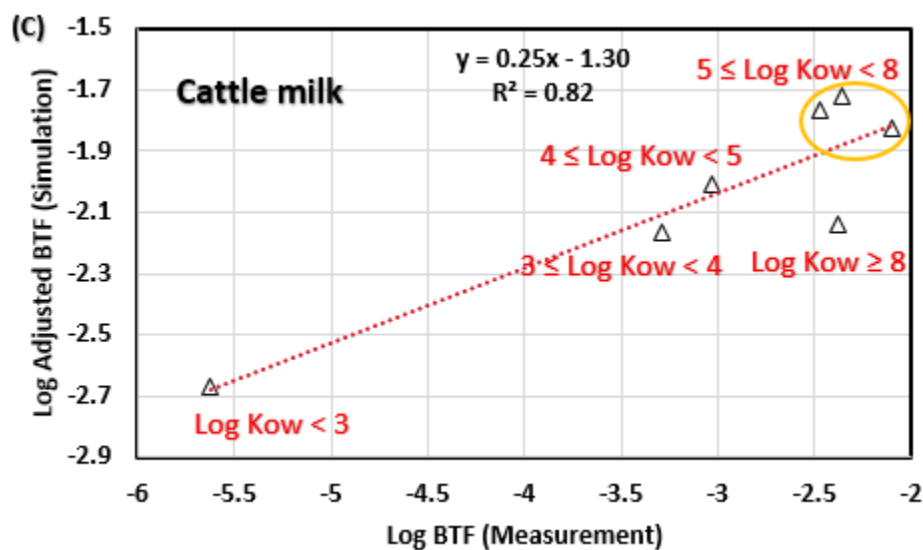

Figure A5. (A) The means of the simulated log BTF<sup>A</sup> values of cattle meat for pesticides in each log Kow interval plotted against those of measurement (meat). (B) The means of the simulated log BTF<sup>A</sup> values of cattle muscle for pesticides in each log Kow interval plotted against those of measurement (meat). (C) The means of the simulated log BTF values of cattle milk for pesticides in each log Kow interval plotted against those of measurement.

### S11. Sensitivity analysis

Sensitivity analysis of the DDT  $K_{\text{Milk/Blood}}$  was conducted for evaluating the impacts of nutritional compositions of cattle raw products on the output results.

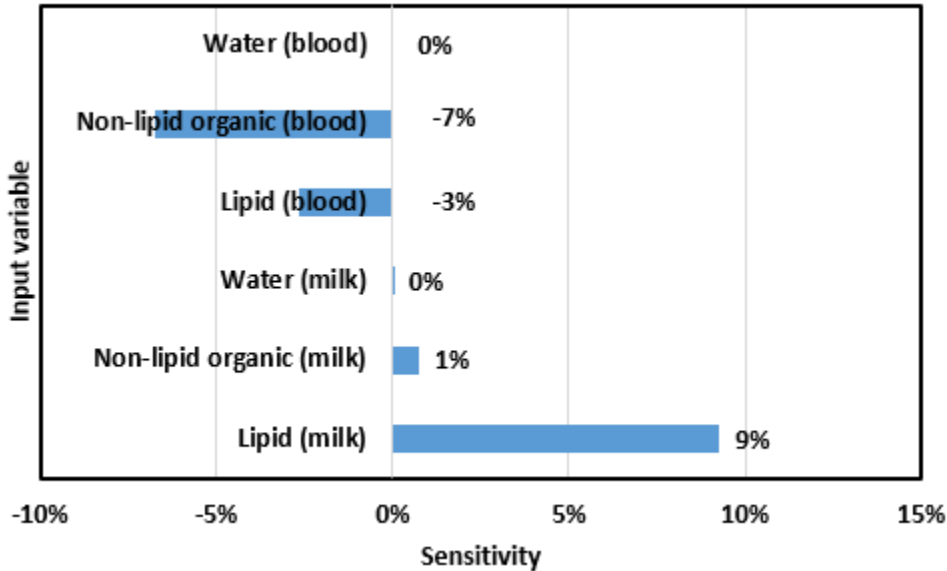

Figure A6. Sensitivity analysis of the DDT  $K_{\text{Milk/Blood}}$  (cattle) by varying 10% of the input variables (nutritional compositions). Water (blood) – water content of blood, non-lipid organic (blood) – non-lipid organic content of blood, lipid (blood) – lipid content of blood, Water (milk) – water content of milk, non-lipid organic (milk) – non-lipid organic content of milk, and lipid (milk) – lipid content of milk.

### S12. Uncertainty analysis

In this section, the spreadsheet-based approach for generating uncertainty intervals and customizing the BTF simulation for specific livestock varieties is illustrated by using the data collected by Rossow et al. (2020) (Table A6). Chlorothalonil, ethephon, and glyphosate was used as examples to show the output results for each type of dairy cows (Table A6), and ratios of  $\text{BTF}_{\text{Milk}}$

between dairy cows 1 and 2 (control group) were plotted against log  $K_{ow}$  for the selected 736 pesticides (Figure A7). Readers can apply the same approach for their chemicals/mammals of interest.

Table A6. Model input variables for control and enzyme-treated dairy cows.

| Model input variables                       | Input positions in the spreadsheet (Supplementary database) | Dairy cow 1            |                        | Dairy cow 2            |                        | Dairy cow 3            |                        |
|---------------------------------------------|-------------------------------------------------------------|------------------------|------------------------|------------------------|------------------------|------------------------|------------------------|
|                                             |                                                             | Control                | Enzyme-treated         | Control                | Enzyme-treated         | Control                | Enzyme-treated         |
| Fat content (%)                             | Sheet 'Cattle' – Table                                      | 4.56                   | 4.46                   | 3.80                   | 3.86                   | 4.03                   | 4.02                   |
| Non-lipid organic content (%)               | 'Media/Products'                                            | 2.91                   | 2.92                   | 2.94                   | 2.91                   | 2.95                   | 2.92                   |
| Cow body mass (kg)                          | Sheet 'Cattle' – Table                                      | 654                    | 656                    | 564                    | 565                    | 635                    | 637                    |
| Milk excretion rate (kg d <sup>-1</sup> )   | 'Physiological variables'                                   | 37.6                   | 38.2                   | 37.9                   | 41.5                   | 43.5                   | 43.7                   |
| Model output results (BTF <sub>Milk</sub> ) |                                                             |                        |                        |                        |                        |                        |                        |
| Chlorothalonil (log K <sub>OW</sub> = 3.05) |                                                             | 0.31                   | 0.30                   | 0.29                   | 0.27                   | 0.27                   | 0.27                   |
| Ethephon (log K <sub>OW</sub> = -0.22)      |                                                             | 0.02                   | 0.02                   | 0.02                   | 0.02                   | 0.02                   | 0.02                   |
| Glyphosate (log K <sub>OW</sub> = -3.40)    |                                                             | 2.3 × 10 <sup>-4</sup> |

Note:

Data were taken from Rossow et al. (2020), and average values were used.

Non-lipid organic contents were approximated using the protein contents provide by Rossow et al. (2020).

Water contents for the BTF simulation in the Spreadsheet were estimated based on the mass balance, with a default value of 0.007 g g<sup>-1</sup> for 'others' (inorganics).

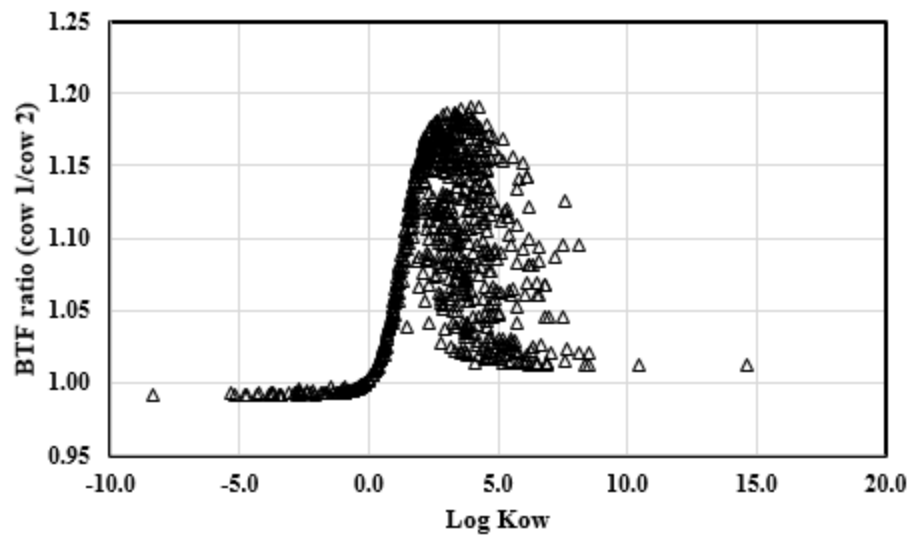

Figure A7. Ratios of biotransfer factors in milk ( $BTF_{\text{Milk}}$ ) between dairy cows 1 and 2 (control group) of the 736 pesticides plotted against log  $K_{ow}$ .

## References

- Al-Atabi, M., Ooi, R.C., Luo, X.Y., Chin, S.B., Bird, N.C., 2012. Computational analysis of the flow of bile in human cystic duct. *Medical Engineering & Physics* 34. <https://doi.org/10.1016/j.medengphy.2011.12.006>
- Alencar, F.A., 1983. Estudos da recuperac,ãõ das proteí nas do plasma bovino por complexac,ãõ com fosfatos e a sua utilizac,ãõ em produtos cá rneos. Universidade Estadual de Campinas.
- Arnot, J.A., Meylan, W., Tunkel, J., Howard, P.H., Mackay, D., Bonnell, M., Boethling, R.S., 2009. A QUANTITATIVE STRUCTURE–ACTIVITY RELATIONSHIP FOR PREDICTING METABOLIC BIOTRANSFORMATION RATES FOR ORGANIC CHEMICALS IN FISH. *Environmental Toxicology and Chemistry* 28. <https://doi.org/10.1897/08-289.1>
- Ashara, K., Shah, K., 2016. Cow’s Urine: an Incredible Aqueous Phase. *Global Journal of Biotechnology & Biochemistry* 11.
- Aswini, D., Santhya, S., Nandheni, T.S., Sukirthini, N., 2017. Cattle Health and Environment Monitoring System . *International Research Journal of Engineering and Technology* 04.
- Brown, J.M.M., 1967. Mechanisms of biliary secretion in the merino sheep. 1. Daily excretion patterns of some components of bile. *Journal of the South African Veterinary Association* 38.
- Calder, W.A., Braun, E.J., 1983. Scaling of osmotic regulation in mammals and birds. *American Journal of Physiology-Regulatory, Integrative and Comparative Physiology* 244. <https://doi.org/10.1152/ajpregu.1983.244.5.R601>
- Calorie-charts, 2018. HOW MANY CALORIES IN BEEF UDDER [WWW Document]. URL <https://webcache.googleusercontent.com/search?q=cache:uzomhEdVl28J:https://www.calorie-charts.info/beef-udder+&cd=1&hl=en&ct=clnk> (accessed 7.23.21).
- Castillo, V., Such, X., Caja, G., Casals, R., Salama, A.A.K., Albanell, E., 2009. Long- and short-term effects of omitting two weekend milkings on the lactational performance and mammary tight junction permeability of dairy ewes. *Journal of Dairy Science* 92. <https://doi.org/10.3168/jds.2008-1937>
- Ciffroy, P., Radomyski, A., 2021. The MERLIN-Expo Mammal model V1.1.
- Duarte, R.T., Carvalho Simões, M.C., Sgarbieri, V.C., 1999. Bovine Blood Components: Fractionation, Composition, and Nutritive Value. *Journal of Agricultural and Food Chemistry* 47. <https://doi.org/10.1021/jf9806255>
- Edwards, N.A., 1975. Scaling of renal functions in mammals. *Comparative Biochemistry and Physiology Part A: Physiology* 52. [https://doi.org/10.1016/S0300-9629\(75\)80128-9](https://doi.org/10.1016/S0300-9629(75)80128-9)
- Gomes da Silva, R., LaScala, N., Lima Filho, A., Catharin, M., 2002. Respiratory heat loss in the sheep: a comprehensive model. *International Journal of Biometeorology* 46. <https://doi.org/10.1007/s00484-002-0128-0>
- Guetouache, M., Guessas, B., Medjekal, S., 2014. Composition and nutritional value of raw milk. *Issues in Biological Sciences and Pharmaceutical Research* 2, 155–122.

- Gulhane, H., Nakanekar, A., Mahakal, N., Bhople, S., Salunke, A., 2017. GOMUTRA (COW URINE): A MULTIDIMENSIONAL DRUG REVIEW ARTICLE. *International Journal of Research in Ayurveda & Pharmacy* 8. <https://doi.org/10.7897/2277-4343.085231>
- Hendriks, A.J., van der Linde, A., Cornelissen, G., Sijm, D.T.H.M., 2001. The power of size. 1. Rate constants and equilibrium ratios for accumulation of organic substances related to octanol-water partition ratio and species weight. *Environmental Toxicology and Chemistry* 20. <https://doi.org/10.1002/etc.5620200703>
- Hertrampf, J.W., Piedad-Pascual, F., 2000. Nutrition of Aquatic Animals at a Glance, in: *Handbook on Ingredients for Aquaculture Feeds*. Springer Netherlands, Dordrecht. [https://doi.org/10.1007/978-94-011-4018-8\\_2](https://doi.org/10.1007/978-94-011-4018-8_2)
- Kelly, B.C., Gobas, F.A.P.C., 2003. An arctic terrestrial food-chain bioaccumulation model for persistent organic pollutants. *Environmental Science and Technology*. <https://doi.org/10.1021/es021035x>
- Lautz, L.S., Dorne, J.L.C.M., Oldenkamp, R., Hendriks, A.J., Ragas, A.M.J., 2020. Generic physiologically based kinetic modelling for farm animals: Part I. Data collection of physiological parameters in swine, cattle and sheep. *Toxicology Letters* 319. <https://doi.org/10.1016/j.toxlet.2019.10.021>
- Li, Z., 2020. PBCLM: A top-down causal modeling framework for soil standards and global sustainable agriculture. *Environmental Pollution*. <https://doi.org/10.1016/j.envpol.2020.114404>
- Løvendahl, P., Sehested, J., 2016. Short communication: Individual cow variation in urinary excretion of phosphorus. *Journal of Dairy Science* 99. <https://doi.org/10.3168/jds.2015-10338>
- Marsden, K.A., Lush, L., Holmberg, Jon.A., Whelan, M.J., King, A.J., Wilson, R.P., Charteris, A.F., Cardenas, L.M., Jones, D.L., Chadwick, D.R., 2020. Sheep urination frequency, volume, N excretion and chemical composition: Implications for subsequent agricultural N losses. *Agriculture, Ecosystems & Environment* 302. <https://doi.org/10.1016/j.agee.2020.107073>
- Murphy, M.R., 1992. Water Metabolism of Dairy Cattle. *Journal of Dairy Science* 75. [https://doi.org/10.3168/jds.S0022-0302\(92\)77768-6](https://doi.org/10.3168/jds.S0022-0302(92)77768-6)
- NutritionData, 2018. NutritionData - know what you eat [WWW Document]. URL <https://nutritiondata.self.com/> (accessed 7.23.21).
- O'Connor, I.A., Huijbregts, M.A.J., Ragas, A.M.J., Hendriks, A.J., 2013. Predicting the oral uptake efficiency of chemicals in mammals: Combining the hydrophilic and lipophilic range. *Toxicology and Applied Pharmacology* 266. <https://doi.org/10.1016/j.taap.2012.10.015>
- Papa, E., van der Wal, L., Arnot, J.A., Gramatica, P., 2014. Metabolic biotransformation half-lives in fish: QSAR modeling and consensus analysis. *Science of The Total Environment* 470–471. <https://doi.org/10.1016/j.scitotenv.2013.10.068>
- Piccione, G., Caola, G., Refinetti, R., 2002. Effect of shearing on the core body temperature of three breeds of Mediterranean sheep. *Small Ruminant Research* 46. [https://doi.org/10.1016/S0921-4488\(02\)00192-X](https://doi.org/10.1016/S0921-4488(02)00192-X)

- Rossow, H.A., Golder, H.M., Lean, I.J., 2020. Variation in milk production, fat, protein, and lactose responses to exogenous feed enzymes in dairy cows. *Applied Animal Science* 36. <https://doi.org/10.15232/aas.2019-01943>
- Schroeder, L.A., 1981. Consumer growth efficiencies: Their limits and relationships to ecological energetics. *Journal of Theoretical Biology* 93. [https://doi.org/10.1016/0022-5193\(81\)90341-6](https://doi.org/10.1016/0022-5193(81)90341-6)
- Steffens, W., 1996. Bedeutung und Vorteile des Einsatzes von Fetten in der Fischernahrung. *Lipid/Fett* 98. <https://doi.org/10.1002/lipi.19960980903>
- Stevens, D., 1981. A model of respiratory vapor loss in Holstein dairy cattle. *Transactions of the ASAE* 24.
- Sutton, J.D., 1985. Digestion and Absorption of Energy Substrates in the Lactating Cow. *Journal of Dairy Science* 68. [https://doi.org/10.3168/jds.S0022-0302\(85\)81251-0](https://doi.org/10.3168/jds.S0022-0302(85)81251-0)
- Symonds, H.W., Mather, D.L., Hall, E.D., 1982. Surgical procedure for modifying the duodenum in cattle to measure bile flow and the diurnal variation in biliary manganese, iron, copper and zinc excretion. *Research in Veterinary Science* 32. [https://doi.org/10.1016/S0034-5288\(18\)32428-7](https://doi.org/10.1016/S0034-5288(18)32428-7)
- USDA, 2021. FoodData Central [WWW Document]. URL <https://fdc.nal.usda.gov/> (accessed 7.23.21).
- USEPA, 2012. Estimation Programs Interface Suite™ for Microsoft® Windows, v 4.11 or insert version used [WWW Document].
- Vitello, D.J., Ripper, R.M., Fettiplace, M.R., Weinberg, G.L., Vitello, J.M., 2015. Blood Density Is Nearly Equal to Water Density: A Validation Study of the Gravimetric Method of Measuring Intraoperative Blood Loss. *Journal of Veterinary Medicine* 2015. <https://doi.org/10.1155/2015/152730>
- Williams, P.G., 2007. Nutritional composition of red meat .
